# Supplementary material for: Molecular and metabolomic changes in the proximal colon of pigs infected with Trichuris suis
Source: PubMed Central journal article supplement (PMC7393168; doi:10.1038/s41598-020-69462-5), 2020-07-30
Supplement: 41598_2020_69462_MOESM1_ESM.pdf [file 41598_2020_69462_MOESM1_ESM.pdf]

**Molecular and metabolomic changes in the proximal colon of pigs infected with *Trichuris suis***

Harry D. Dawson<sup>1</sup>, Celine Chen<sup>1</sup>, Robert W. Li<sup>2</sup>, Lauren Nicole Bell<sup>3</sup>, Terez Sheah-Donohue<sup>4</sup>, Helene Kringel<sup>5</sup>, Ethiopia Beshah<sup>1</sup>, Dolores E. Hill<sup>2</sup>, Joseph F. Urban Jr<sup>1,2</sup>.

<sup>1</sup>United States Department of Agriculture, Agricultural Research Service, Northeast Area, Beltsville Human Nutrition Research Center, Diet Genomics and Immunology Laboratory, <sup>2</sup>Beltsville Agricultural Research Center, Animal Parasitic Disease Laboratory, Beltsville, MD; <sup>3</sup>Metabolon, Inc., Morrisville, NC; <sup>4</sup>University of Maryland School of Medicine, Baltimore, MD, USA; <sup>5</sup>Department of Veterinary Disease Biology, Faculty of Health and Medical Sciences, University of Copenhagen, Copenhagen, Denmark

Supplemental Tables S1, S3, S4, S5, S6, S7, S8, S9, S10, S11, S12

Supplemental Table S1. Isolation of larval and adult stages of *Trichuris suis* from the cecum and proximal colon.

| Exp #/Source   | Pig ID/sex    | Sow ID/date of birth | <i>Trichuris</i> batch #<br>/ ~egg dose | <i>Trichuris</i> / <i>Ascaris</i> adults/ |             | Proximal colon<br>mucosa pathology/colon contents | Molecular/metabolic<br>Analysis |  |
|----------------|---------------|----------------------|-----------------------------------------|-------------------------------------------|-------------|---------------------------------------------------|---------------------------------|--|
|                |               |                      |                                         | DPI recovery                              | liver spots |                                                   |                                 |  |
| #15-19/BARC    | 1092/B        | 689/08/07/2015       | #15-01 - 10,000                         | 42                                        | 900 0/0     | hemorrhagic/loose                                 |                                 |  |
|                | 1096/B        | 163/08/05/2015       | #15-01 - 10,000                         | 42                                        | 0 0/0       | lightly hemorrhagic/semi-solid                    |                                 |  |
|                | 1128/B        | 1181/08/14/2015      | #15-01 - 10,000                         | 42                                        | 1900 0/0    | hemorrhagic/loose                                 |                                 |  |
|                | 1103/B        | 61/08/06/2015        | #15-01 - 10,000                         | 42                                        | 5435 0/0    | hemorrhagic/loose                                 |                                 |  |
|                | notag/B       |                      | #15-01 - 10,000                         | 42                                        | 730 0/0     | hemorrhagic/loose                                 |                                 |  |
|                | 1088/B        | 1672/08/08/2015      | #15-01 - 10,000                         | 42                                        | 711 0/0     | lightly hemorrhagic/loose                         |                                 |  |
|                | 1125/B        | 1185/08/14/2015      | #15-01 - 10,000                         | 42                                        | 2775 0/0    | hemorrhagic                                       |                                 |  |
|                | notag/B       |                      | #15-01 - 10,000                         | 42                                        | 1010 0/0    | lightly hemorrhagic/loose                         |                                 |  |
|                | 1115/B        | 721/08/11/2015       | #15-01 - 10,000                         | 42                                        | 76 0/0      | lightly hemorrhagic/semi-solid                    |                                 |  |
|                | 1116/B        | 861/08/12/2015       | #15-01 - 10,000                         | 42                                        | 1740 0/0    | hemorrhagic/loose                                 |                                 |  |
|                | #15-19/BARC   | 1102/B               | 868/08/05/2015                          | #15-01 - 10,000                           | 49          | 3795 0/0                                          | lightly hemorrhagic/loose       |  |
|                |               | 1118/B               | 490/08/14/2015                          | #15-01 - 10,000                           | 49          | 400 0/0                                           | hemorrhagic/loose/bloody        |  |
| 1095/B         |               | 689/08/07/2015       | #15-01 - 10,000                         | 49                                        | 2250 0/0    | lightly hemorrhagic/loose                         |                                 |  |
| 1104/B         |               | 1535/08/06/2015      | #15-01 - 10,000                         | 49                                        | 1286 0/0    | lightly hemorrhagic/loose                         |                                 |  |
| 1123/B         |               | 721/08/11/2015       | #15-01 - 10,000                         | 49                                        | 2372 0/0    | lightly hemorrhagic/loose                         |                                 |  |
| 1119/B         |               | 861/08/12/2015       | #15-01 - 10,000                         | 49                                        | 1615 0/0    | lightly hemorrhagic/loose                         |                                 |  |
| 1114/B         |               | 861/08/12/2015       | #15-01 - 10,000                         | 49                                        | 1652 0/0    | lightly hemorrhagic/loose                         |                                 |  |
| 1111/B         |               | 861/08/12/2015       | #15-01 - 10,000                         | 49                                        | 415 0/0     | hemorrhagic/loose                                 |                                 |  |
| 1105/B         |               | 861/08/12/2015       | #15-01 - 10,000                         | 49                                        | 355 0/0     | lightly hemorrhagic/loose                         |                                 |  |
| 1107/B         |               | 1181/08/14/2015      | #15-01 - 10,000                         | 49                                        | 1602 0/0    | lightly hemorrhagic/loose                         |                                 |  |
| #15-11/Oakhill |               | 64376/B              | 108/05/04/2015                          | #13-02 - 15,000                           | 56          | 0 0/0                                             | lightly hemorrhagic/loose       |  |
|                |               | 64370/B              | 756/05/02/2015                          | #13-02 - 15,000                           | 56          | 6000* 0/0                                         | hemorrhagic/loose               |  |
|                | 64398/B       | 702/05/01/2015       | #13-02 - 15,000                         | 56                                        | 6280 0/0    | hemorrhagic/loose                                 |                                 |  |
|                | 64378/B       | 910/05/02/2015       | #13-02 - 15,000                         | 56                                        | 5050 0/0    | hemorrhagic/loose                                 |                                 |  |
|                | 64366/B       | 46/04/30/2015        | #13-02 - 15,000                         | 56                                        | 6350 0/0    | hemorrhagic/loose                                 |                                 |  |
|                | 64405/B       | 890/05/02/2015       | #13-02 - 15,000                         | 56                                        | 1300* 0/0   | hemorrhagic/loose                                 |                                 |  |
|                | 64415/B       | 756/05/02/2015       | #13-02 - 15,000                         | 56                                        | 10 0/0      | normal/loose                                      |                                 |  |
|                | 64375/B       | 768/04/28/2015       | #13-02 - 15,000                         | 56                                        | 3,000 0/0   | hemorrhagic/loose                                 |                                 |  |
|                | 64380/B       | 120/05/01/2015       | #13-02 - 15,000                         | 56                                        | 50 0/0      | normal/loose                                      |                                 |  |
|                | 64379/B       | 768/04/28/2015       | #13-02 - 15,000                         | 56                                        | 4680 0/0    | hemorrhagic/loose                                 |                                 |  |
|                | 64388/B       | 863/04/30/2015       | #13-02 - 15,000                         | 56                                        | 800 0/0     | hemorrhagic/loose                                 |                                 |  |
|                | #15-1/Oakhill | 23824/B              | 532/12/05/2014                          | #13-02 - 10,000                           | 28          | 9500 0/0                                          | hemorrhagic/liquid              |  |
| 23796/B        |               | 1023/11/28/2014      | #13-02 - 10,000                         | 28                                        | 15,000 0/0  | hemorrhagic/liquid                                |                                 |  |
| 23802/B        |               | 1221/11/29/2014      | #13-02 - 10,000                         | 28                                        | 1,700 0/0   | strongly hemorrhagic/liquid                       |                                 |  |
| #15-1/Oakhill  | 23816/B       | 1550/12/05/2014      | #13-02 - 10,000                         | 53                                        | 1130 0/0    | normal/normal                                     |                                 |  |
|                | 23828/B       | Oakhill/             | #13-02 - 10,000                         | 53                                        | 1000 0/0    | lightly hemorrhagic/loose                         |                                 |  |
|                | 23829/B       | Oakhill/             | #13-02 - 10,000                         | 53                                        | 0 0/0       | normal/loose                                      |                                 |  |
|                | 23837/B       | Oakhill/             | #13-02 - 10,000                         | 53                                        | 1500* 0/0   | lightly hemorrhagic/loose                         |                                 |  |
|                | 23831/B       | Oakhill/             | #13-02 - 10,000                         | 53                                        | 1600 0/0    | lightly hemorrhagic/loose                         |                                 |  |
|                | 23844/B       | Oakhill/             | #13-02 - 10,000                         | 53                                        | 0 0/0       | normal/normal                                     |                                 |  |
|                | 23845/B       | Oakhill/             | #13-02 - 10,000                         | 53                                        | 800 0/0     | normal/normal                                     |                                 |  |
|                | 23848/B       | Oakhill/             | #13-02 - 10,000                         | 53                                        | 65 0/0      | normal/normal                                     |                                 |  |
|                | 23849/B       | Oakhill/             | #13-02 - 10,000                         | 53                                        | 1100 0/0    | lightly hemorrhagic/loose                         |                                 |  |
| #15-1/Oakhill  | 64376/B       | 108/05/04/2015       | #13-02 - 10,000                         | 56                                        | 0 0/0       | lightly hemorrhagic/normal                        |                                 |  |
|                | 64370/B       | 756/05/02/2015       | #13-02 - 10,000                         | 56                                        | 6000* 0/0   | hemorrhagic/normal                                |                                 |  |
|                | 64398/B       | 702/05/01/2015       | #13-02 - 10,000                         | 56                                        | 6280 0/0    | hemorrhagic/normal                                |                                 |  |
|                | 64378/B       | 910/05/02/2015       | #13-02 - 10,000                         | 56                                        | 5050 0/0    | hemorrhagic/normal                                |                                 |  |
|                | 64366/B       | 46/04/30/2015        | #13-02 - 10,000                         | 56                                        | 6350 0/0    | hemorrhagic/normal                                |                                 |  |
|                | 64405/B       | 890/05/02/2015       | #13-02 - 10,000                         | 56                                        | 1300* 0/0   | hemorrhagic/normal                                |                                 |  |
|                | 64415/B       | 756/05/02/2015       | #13-02 - 10,000                         | 56                                        | 10 0/0      | normal/normal                                     |                                 |  |
|                | 64375/B       | 768/04/28/2015       | #13-02 - 10,000                         | 56                                        | 3,000 0/0   | hemorrhagic/normal                                |                                 |  |
|                | 64380/B       | 120/05/01/2015       | #13-02 - 10,000                         | 56                                        | 50 0/0      | normal/normal                                     |                                 |  |
|                | 64379/B       | 768/04/28/2015       | #13-02 - 10,000                         | 56                                        | 4680 0/0    | hemorrhagic/normal                                |                                 |  |
|                | 64388/B       | 863/4/30/2015        | #13-02 - 10,000                         | 56                                        | 800 0/0     | hemorrhagic/normal                                |                                 |  |
|                | #13-2/BARC    | 161/M                | 334/06/23/2013                          | #10-01 - 10,000                           | 28          | 1250 2F/0                                         |                                 |  |
| 182/F          |               | 283/06/25/2013       | #10-01 - 10,000                         | 28                                        | 1000 1F/0   |                                                   |                                 |  |
| 172/F          |               | 339/06/25/2013       | #10-01 - 10,000                         | 28                                        | 250 1F/1    |                                                   |                                 |  |
| 170/M          |               | 339/06/25/2013       | #13-01 - 10,000                         | 28                                        | 1375 1F/0   |                                                   |                                 |  |
| 7698/F         |               | 320/06/13/2013       | #13-01 - 10,000                         | 28                                        | 8000 0/0    |                                                   |                                 |  |
| #13-2/BARC     |               | 190M                 | 313/06/27/2013                          | #10-01 - 10,000                           | 54          | 0 1F, 2M/0                                        | hemorrhagic/loose               |  |
|                | 615/F         | 334/06/23/2013       | #10-01 - 10,000                         | 54                                        | 150 0/0     | hemorrhagic/loose                                 |                                 |  |
|                | 221/M         |                      | #10-01 - 10,000                         | 54                                        | 1100 2F/0   | normal/normal                                     |                                 |  |
|                | 222/M         | 312/07/14/2013       | #10-01 - 10,000                         | 54                                        | 154 0/0     | hemorrhagic/loose                                 |                                 |  |
|                | 20/M          | 312/07/14/2013       | #10-01 - 10,000                         | 54                                        | 222 0/0     | hemorrhagic/loose                                 |                                 |  |
|                | 221/M         | 312/07/14/2013       | #10-01 - 10,000                         | 54                                        | 0 0/0       | hemorrhagic/loose                                 |                                 |  |
|                | 7077/F        | 343/08/04/2013       | #10-01 - 10,000                         | 54                                        | 0 0/0       | lightly hemorrhagic/normal                        |                                 |  |

|            |        |                 |                 |    |           |                                      |                        |
|------------|--------|-----------------|-----------------|----|-----------|--------------------------------------|------------------------|
|            | 7075/F | 343/08/04/2013  | #10-01 -10,000  | 54 | 0 0/0     | normal/normal                        |                        |
|            | 7071/F | 343/08/04/2013  | #10-01 -10,000  | 54 | 480 0/0   | normal/normal                        |                        |
|            | 7076/F | 343/08/04/2013  | #10-01 -10,000  | 54 | 0 0/0     | hemorrhagic/loose                    |                        |
| #13-2/BARC | 7419/F | 302/11/05/2012  | #12-01 - 10,000 | 54 | 107 0/0   |                                      |                        |
|            | 418/F  | 302/11/05/2012  | #12-01 - 10,000 | 54 | 240 0/0   |                                      |                        |
|            | 7420/F | 231/11/06/2012  | #12-01 - 10,000 | 54 | 289 0/0   |                                      |                        |
|            | 7421/M | 231/11/06/2012  | #12-01 - 10,000 | 54 | 500 0/0   |                                      |                        |
|            | 7411/M | 302/11/05/2012  | #12-01 - 10,000 | 54 | 190 0/0   |                                      |                        |
|            | 7427/M | 231/11/06/2012  | #12-01 - 10,000 | 54 | 160 0/0   |                                      |                        |
|            | 7429/F | 231/11/06/2012  | #12-01 - 10,000 | 54 | 1 0/0     |                                      |                        |
|            | 7423/F | 231/11/06/2012  | #12-01 - 10,000 | 54 | 147 0/0   |                                      |                        |
|            | 7412/F | 231/11/06/2012  | #12-01 - 10,000 | 54 | 105 0/0   |                                      |                        |
|            | 7410/M | 302/11/05/2012  | #12-01 - 10,000 | 54 | 170 0/0   |                                      |                        |
| #13-2/BARC | 96/F   | 311/01/07/2013  | #12-01 - 10,000 | 56 | 0 1F/0    |                                      |                        |
|            | 554/F  | 367/01/13/2013  | #12-01 - 10,000 | 56 | 0 3M/0    |                                      |                        |
|            | 546/F  | 345/01/13/2013  | #12-01 - 10,000 | 56 | 230 0/0   |                                      |                        |
|            | 538/F  | 348/01/12/2013  | #12-01 - 10,000 | 56 | 187 0/0   |                                      |                        |
|            | 7536/F | 348/01/12/2013  | #12-01 - 10,000 | 56 | 55 0/0    |                                      |                        |
|            | 7541/F | 345/01/13/2013  | #12-01 - 10,000 | 56 | 67 0/0    |                                      |                        |
|            | 7555/F | 367/01/13/2013  | #12-01 - 10,000 | 56 | 33 0/0    |                                      |                        |
|            | 7537/F | 348/01/12/2013  | #12-01 - 10,000 | 56 | 240 1F/0  |                                      |                        |
| #12-7/BARC | 122/F  | 8088/03/17/2012 | #07-01 - 10,000 | 21 | 2750 0/0  | normal/normal                        |                        |
|            | 126/F  | 8088/03/17/2012 | #07-01 - 10,000 | 21 | 3593 0/0  | normal/normal                        |                        |
|            | 126/M  | 306/03/11/2012  | #10-01 - 10,000 | 21 | 1530 0/0  | normal/normal                        |                        |
|            | 130/F  | 306/03/11/2012  | #10-01 - 10,000 | 21 | 3220 0/0  | normal/normal                        |                        |
|            | 119/M  | 8088/03/17/2012 | #12-01 - 10,000 | 21 | 765 0/0   | normal/normal                        |                        |
|            | 112/M  | 690/03/16/2012  | #12-01 - 10,000 | 21 | 980 0/0   | normal/normal                        |                        |
|            | 113/F  | 690/03/16/2012  | #07-02 - 10,000 | 21 | 1470 0/0  | normal/normal                        |                        |
|            | 115/F  | 690/03/16/2012  | #07-02 - 10,000 | 21 | 1530 0/0  | normal/normal                        |                        |
| #12-7/BARC | 7324/M | 5070/08/12/2012 | #07-02 - 10,000 | 28 | 1,666 0/0 | abundant mucus and hemorrhagic       |                        |
|            | 7320/M | 5070/08/12/2012 | #10-01 - 10,000 | 28 | 833* 0/0  | abundant mucus and hemorrhagic       |                        |
| #12-7/BARC | 7364   |                 | #10-01 - 10,000 | 34 | 51 0/0    | hemorrhagic/diarrhea                 |                        |
|            | 7383/M | 0547/09/15/2012 | #07-02 - 10,000 | 34 | 3500 0/0  | hemorrhagic/diarrhea                 |                        |
|            | 7381/M | 0547/09/15/2012 | #07-02 - 10,000 | 34 | 2750 0/0  | hemorrhagic/diarrhea                 |                        |
| #12-7/BARC | 7321/F | 5070/08/12/2012 | #07-02 - 10,000 | 42 | 110 0/0   | normal/soft                          |                        |
|            | 7322/F | 5070/08/12/2012 | #07-02 - 10,000 | 42 | 0 0/0     | normal/soft                          |                        |
|            | 7327/F | 5070/08/12/2012 | #10-01 - 10,000 | 42 | 0 0/0     | normal/soft                          |                        |
| #12-7/BARC | 7282/M | 302/05/21/2012  | #12-01 - 10,000 | 51 | 570 0/0   | lightlyhemorrhagic/normal            |                        |
|            | 7255/M | 5077/05/16/2012 | #12-01 - 10,000 | 51 | 0 0/0     | normal/normal                        |                        |
|            | 7275/M | 322/05/17/2012  | #12-01 - 10,000 | 51 | 32 0/0    | normal/normal                        |                        |
|            | 7243/M | 317/05/16/2012  | #12-01 - 10,000 | 51 | 2 0/0     | normal/normal                        |                        |
|            | 7306/M | 182/05/23/2012  | #12-01 - 10,000 | 51 | 0 0/0     | normal/normal                        |                        |
|            | 7291/M | 182/05/23/2012  | #12-01 - 10,000 | 51 | 225 0/0   | normal/normal                        |                        |
|            | 7302/M | 182/05/23/2012  | #12-01 - 10,000 | 51 | 255 0/0   | normal/normal                        |                        |
|            | 7326/M | 188/05/24/2012  | #12-01 - 10,000 | 51 | 185 0/0   | normal/normal                        |                        |
|            | 7324/M | 188/05/24/2012  | #12-01 - 10,000 | 51 | 250 0/0   | normal/normal                        |                        |
|            | 7321/M | 188/05/24/2012  | #12-01 - 10,000 | 51 | 0 0/0     | normal/normal                        |                        |
| #12-7/BARC | 7367/F | 318/09/13/2012  | #12-01 - 10,000 | 55 | 0 0/0     | normal/normal                        |                        |
|            |        | 0547/09/18/2012 | #12-01 - 10,000 | 55 | 345 0/0   | lightly hemorrhagic/normal           |                        |
|            |        | 0547/09/18/2012 | #12-01 - 10,000 | 55 | 31 0/0    | hemorrhagic/diarrhea; serosal fragil |                        |
|            |        | 0547/09/18/2012 | #12-01 - 10,000 | 55 | 78 0/0    | hemorrhagic/diarrhea; serosal fragil |                        |
|            | 7389/F | 0547/09/18/2012 | #12-01 - 10,000 | 55 | 350 0/0   | normal/loose                         |                        |
|            |        | 0547/09/18/2012 | #12-01 - 10,000 | 55 | 0 0/0     | normal/normal                        |                        |
|            |        | 4088/09/20/2012 | #12-01 - 10,000 | 55 | 38 0/0    | hemorrhagic/diarrhea; serosal fragil |                        |
|            |        | 4088/09/20/2012 | #12-01 - 10,000 | 55 | 192 0/0   | hemorrhagic/diarrhea; serosal fragil |                        |
|            |        | 0245/09/21/2012 | #12-01 - 10,000 | 55 | 0 0/0     | normal/normal                        |                        |
|            |        | 230/08/13/2012  | #12-01 - 10,000 | 55 | 0 0/0     | normal/normal                        |                        |
| #12-2/BARC | 660/F  | 194/11/22/2011  | #11-01 - 10,000 | 21 | 1710 0/0  | lightly hemorrhagic/semi-solid       | Physiology Fig. 2a; 2b |
|            | 662/M  | 194/11/22/2011  | #11-01 - 10,000 | 21 | 3140 0/0  | lightly hemorrhagic/semi-solid       | Physiology Fig. 2a; 2b |
|            | 650/F  | 185/11/05/2011  | #11-01 - 10,000 | 21 | 2200 0/0  | lightly hemorrhagic/semi-solid       | Physiology Fig. 2a; 2b |
|            | 673/F  | 182/11/24/2011  | #11-01 - 10,000 | 21 | 2220 0/0  | mildly pathology/loose               | Physiology Fig. 2a; 2b |
|            | 651/F  | 185/11/05/2011  | #11-01 - 10,000 | 21 | 2000 0/0  | mildly pathology/loose               | Physiology Fig. 2a; 2b |
|            | 658/F  | 185/11/05/2011  | #11-01 - 10,000 | 21 | 1,300 0/0 | lightly hemorrhagic/semi-solid       | Physiology Fig. 2a; 2b |
| #12-2/BARC | 7044/M | 199/01/07/2012  | 11:01 - 10,000  | 35 | 1 0/0     | normal/normal                        | Physiology Fig. 2a; 2b |
|            | 7070/M | 1895/01/10/2012 | 11:01 - 10,000  | 35 | 2 0/0     | normal/normal                        | Physiology Fig. 2a; 2b |
|            | 7091/M | 5001/01/11/2012 | 11:01 - 10,000  | 35 | 200 0/0   | normal/normal                        | Physiology Fig. 2a; 2b |
|            | 7031/M | 6001/01/06/2012 | 11:01 - 10,000  | 35 | 450* 0/0  | lightly hemorrhagic/loose            | Physiology Fig. 2a; 2b |

|            |        |                  |                     |    |             |                                  |                         |
|------------|--------|------------------|---------------------|----|-------------|----------------------------------|-------------------------|
|            | 7300/M | 206/01/12/2012   | 11:01 - 10,000      | 35 | 350 0/0     | lightly hemorrhagic/loose        | Physiology Fig. 2a; 2b  |
|            | 7050/M | 316/01/10/2012   | 11:01 - 10,000      | 35 | 400 0/0     | lightly hemorrhagic/loose        | Physiology Fig. 2a; 2b  |
|            | 7034/M | 6001/01/06/2012  | 11:01 - 10,000      | 35 | 150 0/0     | normal/semi-solid                | Physiology Fig. 2a; 2b  |
|            | 7036/M | 6001/01/06/2012  | 11:01 - 10,000      | 35 | 4 0/0       | normal/semi-solid                | Physiology Fig. 2a; 2b  |
| #12-2/BARC | 7081/M | 321/01/10/2012   | 11:01 - 10,000      | 42 | 130 0/0     | lightly hemorrhagic/loose        | Physiology Fig. 2a; 2b  |
|            | 7023/M | 1088/01/06/2012  | 11:01 - 10,000      | 42 | 44 0/0      | normal/semi-solid                | Physiology Fig. 2a; 2b  |
|            | 7040/M | 199/01/07/2012   | 11:01 - 10,000      | 42 | 0 0/0       | normal/semi-solid                | Physiology Fig. 2a; 2b  |
|            | 7044/M | 199/01/07/2012   | 11:01 - 10,000      | 42 | 3 0/0       | normal/semi-solid                | Physiology Fig. 2a; 2b  |
|            | 7092/M | 5001/01/11/2012  | 11:01 - 10,000      | 42 | 79 0/0      | normal/semi-solid                | Physiology Fig. 2a; 2b  |
|            | 7069/M | 1977/01/10/2012  | 11:01 - 10,000      | 42 | 52 0/0      | normal/normal                    | Physiology Fig. 2a; 2b  |
|            | 7021/M | 1088/01/06/2012  | 11:01 - 10,000      | 42 | 37 0/0      | normal/semi-solid                | Physiology Fig. 2a; 2b  |
|            | 7043/M | 199/01/07/2012   | 11:01 - 10,000      | 42 | 5 0/0       | normal/semi-solid                | Physiology Fig. 2a; 2b  |
| #12-2/BARC | 659/F  | 185/11/05/2011   | 11:01 - 10,000      | 52 | 0 0/0       | normal/normal                    | Physiology Fig. 2a; 2b  |
|            | 695/F  | 1950/11/29/2011  | 11:01 - 10,000      | 52 | 61* 0/0     | lightly hemorrhagic/semi-solid   | Physiology Fig. 2a; 2b  |
|            | 671/F  | 182/11/24/2011   | 11:01 - 10,000      | 52 | 0 0/0       | normal/normal                    | Physiology Fig. 2a; 2b  |
|            | 692/M  | 1950/11/29/2011  | 11:01 - 10,000      | 52 | 0 0/0       | normal/normal                    | Physiology Fig. 2a; 2b  |
|            | 55/F   | 185/11/05/2011   | 11:01 - 10,000      | 52 | 1009 0/0    | mildly hemorrhagic/loose         | Physiology Fig. 2a; 2b  |
| #12-2/BARC | 653/F  | 185/11/05/2011   | 11:01 - 10,000      | 53 | 291 0/0     | fragile tissue/loose             | Physiology Fig. 2a; 2b  |
|            | 685/F  | 6009/11/24/2011  | 11:01 - 10,000      | 53 | 6 0/0       | normal/normal                    | Physiology Fig. 2a; 2b  |
|            | 682/F  | 6009/11/24/2011  | 11:01 - 10,000      | 53 | 0 0/0       | normal/normal                    | Physiology Fig. 2a; 2b  |
|            | 683/M  | 6009/11/24/2011  | 11:01 - 10,000      | 53 | 328 0/0     | lightly hemorrhagic/semi-solid   | Physiology Fig. 2a; 2b  |
|            | 698/F  | 1950/11/29/2011  | 11:01 - 10,000      | 53 | 0 0/0       | normal/normal                    | Physiology Fig. 2a; 2b  |
| #10-6/BARC | 31/F   | 1942/08/15/2010  | #10-06 - 10,000     | 33 | 1158 0/0    |                                  | Metabolomics; Fig. 6-11 |
|            | 35/F   | 1942/08/15/2010  | #10-06 - 10,000     | 33 | 914 0/0     |                                  | Metabolomics; Fig. 6-11 |
|            | 9066/F | 1948/08/06/2010  | #10-06 - 10,000     | 33 | 884 0/0     |                                  | Metabolomics; Fig. 6-11 |
|            | 9069/F | 1948/08/06/2010  | #10-06 - 10,000     | 33 | 1225 0/0    |                                  | Metabolomics; Fig. 6-11 |
|            | 30/F   | 1942/08/15/2010  | #10-06 - 10,000     | 33 | 1275 0/0    |                                  | Metabolomics; Fig. 6-11 |
|            | 37/F   | 1942/08/15/2010  | #10-06 - 10,000     | 33 | 708 0/0     |                                  | Metabolomics; Fig. 6-11 |
|            | 35/M   | 1942/08/15/2010  | #10-06 - 10,000     | 33 | 1176 0/0    |                                  | Metabolomics; Fig. 6-11 |
|            | 9050/F | 1329/08/05/2010  | #10-06 - 10,000     | 33 | 1080 0/0    |                                  | Metabolomics; Fig. 6-11 |
|            | 9068/F | 1948/08/06/2010  | #10-06 - 10,000     | 33 | 1160 0/0    |                                  | Metabolomics; Fig. 6-11 |
|            | 9085/F | 1977/08/07/2010  | #10-06 - 10,000     | 33 | 956 3F;1M/1 |                                  | ND                      |
|            | 9070/F | 484/08/07/2010   | #10-06 - 10,000     | 33 | 428* 0/0    |                                  | Metabolomics; Fig. 6-11 |
|            | 9072/F | 484/08/07/2010   | #10-06 - 10,000     | 33 | 940 0/0     |                                  | Metabolomics; Fig. 6-11 |
| #10-6/BARC | 9074/F | 484/08/07/2010   | #10-01 - 10,000     | 52 | 0 0/0       | normal/normal                    |                         |
|            | 9071/F | 484/08/07/2010   | #10-01 - 10,000     | 52 | 0 0/0       | normal/normal                    |                         |
|            | 9081/F | 1977/08/07/2010  | #10-01 - 10,000     | 52 | 0 1F/0      | normal/normal                    |                         |
|            | 33/F   | 1942/08/15/2010  | #10-01 - 10,000     | 52 | 1089 0/0    | heavy mucus; hemorrhagic/normal  | Transcriptomics; Fig. 5 |
|            | 39/F   | 1942/08/15/2010  | #10-01 - 10,000     | 52 | 323 0/0     | heavy mucus; hemorrhagic/normal  | Transcriptomics; Fig. 5 |
|            | 30/F   | 1942/08/15/2010  | #10-01 - 10,000     | 52 | 0 0/0       | normal/normal                    | Transcriptomics; Fig. 5 |
|            | 9061/F | 1948/08/06/2010  | #10-01 - 10,000     | 52 | 0 0/0       | normal/normal                    | Transcriptomics; Fig. 5 |
| #10-6/BARC | 30/M   | 1942/08/15/2010  | #10-01 - 10,000     | 53 | 0 0/0       | normal/normal                    |                         |
|            | 9057/F | 1329/08/05/2010  | #10-01 - 10,000     | 53 | 0 0/0       | normal/normal                    | Transcriptomics; Fig. 5 |
|            | 9052/F | 1329/08/05/2010  | #10-01 - 10,000     | 53 | 83 0/0      | normal/normal                    |                         |
|            | 12/F   | 1907/08/10/2010  | #10-01 - 10,000     | 53 | 0 0/0       | normal/normal                    | Transcriptomics; Fig. 5 |
|            | 9063/F | 1948/08/06/2010  | #10-01 - 10,000     | 53 | 0 0/0       | normal/normal                    | Transcriptomics; Fig. 5 |
|            | 9067/F | 1948/08/06/2010  | #10-01 - 10,000     | 53 | 567 0/0     | heavy mucus; hemorrhagic/normal  | Transcriptomics; Fig. 5 |
|            | 9/F    | 1437/08/10/2010  | #10-01 - 10,000     | 53 | 0 1F;4M/0   | normal/normal                    |                         |
| #09-7/BARC | 3057/  | 427/06/01/2009   | #09-01/-02 - 30,000 | 21 | 4000 0/0    | hemorrhagic/loose                | Transcriptomics; Fig. 4 |
|            | 3073/F | 300/06/04/2009   | #09-01/-02 - 30,000 | 21 | 1666 0/0    | hemorrhagic/loose                | Transcriptomics; Fig. 4 |
|            | 3087/F | 107/06/06/2009   | #09-01/-02 - 30,000 | 21 | 4000 0/0    | strongly hemorrhagic/loose/blood |                         |
|            | 4041/  | 438/06/19/2009   | #09-01/-02 - 30,000 | 21 | 7000 0/0    | hemorrhagic/loose                |                         |
|            | 4062/  |                  | #09-01/-02 - 30,000 | 21 | 1000 0/0    | hemorrhagic/loose                |                         |
|            | 3094/M | 466/06/09/2009   | #09-01/-02 - 30,000 | 21 | 2500 0/0    | hemorrhagic/loose                |                         |
|            | 4040/M | 438/06/19/2009   | #09-01/-02 - 30,000 | 21 | 2833 0/0    | hemorrhagic/loose                |                         |
|            | 4044/M | 438/06/19/2009   | #09-01/-02 - 30,000 | 21 | 2166 0/0    | hemorrhagic/loose                |                         |
|            | 3058/  | 427/06/01/2009   | #09-01/-02 - 30,000 | 21 | 1666 0/0    | hemorrhagic/loose                | Transcriptomics; Fig. 4 |
|            | 3086/  | 107/06/06/2009   | #09-01/-02 - 30,000 | 21 | 666 0/0     | mildly hemorrhagic/normal        |                         |
| #173/BARC  | 9002   | 20025/02/01/2002 | #01-01 - 3,750      | 53 | 1880 0/0    |                                  | qPCR; Fig 3             |
|            | 7714   | 20024/1/22/2002  | #01-01 - 3,750      | 53 | 1410 0/0    |                                  | ND                      |
|            | 7713   | 20024/1/22/2002  | #01-01 - 3,750      | 53 | 6 0/0       |                                  | qPCR; Fig 3             |
|            | 7712   | 20024/1/22/2002  | #01-01 - 3,750      | 53 | 2030 0/0    |                                  | qPCR; Fig 3             |
|            | 8406   | 20023/1/18/2002  | #01-01 - 3,750      | 53 | 1220 0/0    |                                  | ND                      |
|            | 8205   | 20022/1/16/2002  | #01-01 - 3,750      | 53 | 2 0/0       |                                  | qPCR; Fig 3             |
|            | 7719   | 20024/1/22/2002  | #01-01 - 3,750      | 53 | 10 0/0      |                                  | qPCR; Fig 3             |
|            | 8202   | 20022/1/16/2002  | #01-01 - 3,750      | 53 | 2000 0/0    |                                  | qPCR; Fig 3             |
|            | 8404   | 20022/1/16/2002  | #01-01 - 3,750      | 53 | 1560 0/0    |                                  | ND                      |
|            | 8107   | 20021/1/7/2002   | #01-01 - 3,750      | 53 | 986 0/0     |                                  | ND                      |

Pig Sex - male (M); female (F); barrow (B)

\*indicates worms smaller than average within the group

*Ascaris* adult females (F) or males (M)

**Supplemental Table S3. DEGs in the proximal colon of infected over control pigs at 21 days after inoculation.**

| Feature ID | Fold change | EDGE test: FDR p-value correction |
|------------|-------------|-----------------------------------|
| PLA2G2A    | -1633.2     | 1.33E-05                          |
| OLIG2      | -143.0      | 1.09E-03                          |
| ZFP42      | -89.1       | 3.67E-11                          |
| DNAH14     | -60.4       | 1.56E-02                          |
| COL22A1    | -56.8       | 1.34E-02                          |
| ADAM1A     | -52.9       | 1.87E-02                          |
| ASTL       | -49.0       | 2.75E-02                          |
| FABP3L2*   | -44.6       | 1.84E-04                          |
| ABCC4L3    | -23.7       | 8.32E-19                          |
| LIPM       | -19.0       | 2.62E-02                          |
| ZSCAN9     | -18.9       | 4.68E-02                          |
| CD40       | -17.7       | 4.10E-02                          |
| MIR1279    | -16.9       | 4.50E-05                          |
| SLC22A10L3 | -14.0       | 1.75E-03                          |
| HOXC9      | -12.3       | 5.27E-03                          |
| ABCC4L4    | -12.2       | 7.35E-07                          |
| FCER2      | -12.0       | 1.34E-02                          |
| AGTR2      | -11.5       | 3.94E-03                          |
| ALDOB      | -10.6       | 8.40E-19                          |
| CCL3L2     | -10.6       | 5.90E-03                          |
| MIR1244-1  | -9.7        | 6.08E-03                          |
| SLC30A10   | -9.4        | 2.71E-13                          |
| OAZ3       | -8.8        | 2.23E-02                          |
| SLC14A1    | -7.9        | 9.93E-11                          |
| TRPV6      | -7.7        | 1.24E-06                          |
| HMGCS2     | -7.2        | 0.00E+00                          |
| CD200R1L   | -6.9        | 7.81E-03                          |
| ABCA8      | -6.8        | 4.42E-10                          |
| PHEX       | -6.8        | 1.81E-02                          |
| ABCA6      | -6.4        | 3.40E-08                          |
| CXCL9      | -6.1        | 7.08E-08                          |
| CCR9       | -5.8        | 1.14E-02                          |
| CXCL13     | -5.8        | 5.77E-08                          |
| COL6A6     | -5.7        | 3.51E-08                          |
| COL25A1    | -5.6        | 7.28E-04                          |
| AGT        | -5.6        | 1.62E-05                          |
| S100G      | -5.6        | 3.09E-05                          |
| CCL3L1     | -5.6        | 2.84E-03                          |
| ABCA9      | -5.5        | 3.06E-08                          |
| MOGAT2     | -5.4        | 8.78E-03                          |
| AICDA      | -5.3        | 8.16E-04                          |
| CR2        | -5.2        | 3.00E-14                          |
| FCRL1      | -5.0        | 1.34E-02                          |
| SLC24A4    | -4.9        | 8.53E-03                          |
| CYP26B1    | -4.8        | 9.76E-03                          |

|           |      |          |
|-----------|------|----------|
| MUSK      | -4.8 | 5.12E-05 |
| ZNF354B   | -4.7 | 1.05E-02 |
| PDK4      | -4.6 | 5.99E-03 |
| PLIN1     | -4.3 | 4.50E-05 |
| CD5L      | -4.2 | 2.41E-02 |
| GPR174    | -4.1 | 4.81E-08 |
| HAS3      | -4.0 | 4.07E-05 |
| TNFSF11   | -4.0 | 1.83E-03 |
| CYP1B1    | -3.9 | 2.93E-04 |
| IDO1      | -3.8 | 6.52E-05 |
| FCRLA     | -3.8 | 3.49E-02 |
| NR1H4     | -3.7 | 1.44E-02 |
| SLC7A3L7* | -3.6 | 4.06E-04 |
| CLEC17A   | -3.6 | 4.30E-03 |
| ABCG2     | -3.5 | 9.73E-07 |
| SLC25A53  | -3.5 | 2.19E-02 |
| NXPE2     | -3.4 | 2.01E-03 |
| KLRK1     | -3.4 | 6.23E-09 |
| ABCC4L2   | -3.4 | 2.05E-10 |
| MAMDC2    | -3.4 | 3.09E-05 |
| GHR       | -3.4 | 2.10E-05 |
| ART3      | -3.3 | 3.07E-02 |
| PNLIPRP2  | -3.3 | 7.77E-06 |
| ADORA3    | -3.3 | 5.03E-03 |
| GCNT4     | -3.3 | 6.50E-03 |
| AQP8      | -3.3 | 3.30E-04 |
| XCL1      | -3.3 | 3.63E-03 |
| AGTR1     | -3.2 | 6.35E-04 |
| ABCA13    | -3.2 | 3.49E-02 |
| PF4       | -3.2 | 1.71E-02 |
| CD28      | -3.2 | 1.08E-02 |
| CLCA4     | -3.1 | 1.16E-02 |
| FBXO32    | -3.1 | 9.94E-05 |
| ABI3BP    | -3.0 | 8.43E-06 |
| DDIT4L    | -3.0 | 2.84E-04 |
| EDIL3     | -3.0 | 3.93E-07 |
| CR1       | -3.0 | 1.86E-02 |
| CHRM2     | -3.0 | 7.15E-03 |
| LY9L1*    | -3.0 | 1.09E-02 |
| SNORA32   | -3.0 | 1.95E-02 |
| KLF12     | -2.9 | 1.06E-03 |
| CHP2      | -2.9 | 1.12E-05 |
| PAX5      | -2.8 | 2.30E-02 |
| RPL11L    | -2.8 | 7.05E-03 |
| CCL8      | -2.8 | 4.24E-02 |
| ASPA      | -2.8 | 1.01E-02 |
| NGLY1     | -2.8 | 4.52E-07 |

|          |      |          |
|----------|------|----------|
| HDAC9    | -2.7 | 7.28E-04 |
| IL15     | -2.7 | 3.09E-02 |
| AR       | -2.7 | 4.53E-02 |
| ADAMTS19 | -2.6 | 1.33E-02 |
| LIFR     | -2.6 | 3.03E-05 |
| RHOH     | -2.6 | 2.84E-03 |
| HOXD10   | -2.6 | 1.85E-02 |
| NEGR1    | -2.6 | 9.36E-03 |
| ADGRE4   | -2.6 | 1.56E-03 |
| CTBS     | -2.5 | 3.96E-02 |
| CELF2    | -2.5 | 4.04E-06 |
| CD1D     | -2.5 | 2.89E-03 |
| GPNMB    | -2.5 | 3.04E-05 |
| BMP3     | -2.5 | 2.94E-03 |
| SLC26A3  | -2.5 | 8.05E-03 |
| PADI2    | -2.5 | 1.60E-04 |
| TNFSF13B | -2.5 | 2.69E-04 |
| KCNJ2    | -2.5 | 2.94E-04 |
| NT5E     | -2.5 | 1.78E-04 |
| DAPK1    | -2.5 | 8.50E-03 |
| PRSS12   | -2.5 | 5.62E-03 |
| SLA-DQB1 | -2.5 | 1.55E-03 |
| BTC      | -2.4 | 1.84E-02 |
| LYPD6    | -2.4 | 1.56E-02 |
| SLA-DMB  | -2.4 | 3.61E-04 |
| PPFIA4   | -2.4 | 2.68E-02 |
| C4BPAL   | -2.4 | 3.78E-02 |
| IPCEF1   | -2.3 | 2.46E-02 |
| DMD      | -2.3 | 4.69E-05 |
| C3AR1    | -2.3 | 5.27E-03 |
| KIT      | -2.3 | 2.04E-02 |
| PDGFC    | -2.3 | 2.70E-03 |
| RPL35A   | -2.3 | 1.95E-03 |
| CXCL12   | -2.3 | 5.03E-03 |
| CNTN1    | -2.3 | 2.41E-02 |
| CST3     | -2.3 | 3.93E-04 |
| GPR82    | -2.2 | 1.35E-02 |
| AHRR     | -2.2 | 2.98E-02 |
| LPXN     | -2.2 | 1.56E-03 |
| SLC16A1  | -2.2 | 1.59E-03 |
| PTPN7    | -2.2 | 1.83E-03 |
| EGLN3    | -2.2 | 1.65E-03 |
| CD4      | -2.2 | 1.61E-02 |
| ADIPOQ   | -2.2 | 4.06E-03 |
| ADAMTS5  | -2.2 | 1.84E-02 |
| APH1B    | -2.2 | 3.53E-02 |
| TMTC1    | -2.2 | 2.39E-02 |

|         |      |          |
|---------|------|----------|
| SESN3   | -2.2 | 5.41E-04 |
| CHL1    | -2.2 | 1.49E-02 |
| SMAD9   | -2.2 | 3.79E-04 |
| ZNF672  | -2.1 | 1.41E-02 |
| TLR8    | -2.1 | 1.41E-02 |
| PGM5    | -2.1 | 8.60E-04 |
| DTNA    | -2.1 | 2.37E-02 |
| MPEG1   | -2.1 | 7.99E-03 |
| SLC8A1  | -2.1 | 2.28E-03 |
| CD302   | -2.1 | 6.84E-03 |
| CD3G    | -2.1 | 8.80E-03 |
| SLAMF6  | -2.1 | 4.40E-02 |
| HPSE    | -2.1 | 4.45E-03 |
| MAF     | -2.1 | 1.40E-02 |
| RARRES1 | -2.0 | 2.81E-03 |
| PIK3AP1 | -2.0 | 6.93E-03 |
| PLXNC1  | -2.0 | 1.18E-03 |
| CCL2    | -2.0 | 1.38E-03 |
| ZNF568  | -2.0 | 1.33E-02 |
| FAM65B  | -2.0 | 2.68E-02 |
| LRIG2   | -2.0 | 5.03E-03 |
| SDPR    | -2.0 | 4.88E-03 |
| SLC22A5 | -2.0 | 4.83E-02 |
| TLR7    | -2.0 | 4.66E-02 |
| RDH10   | -2.0 | 2.25E-02 |
| PCMTD2  | -2.0 | 2.03E-02 |
| CALD1   | -2.0 | 5.64E-03 |
| CYP4V2  | -2.0 | 1.52E-02 |
| COL6A5  | -2.0 | 1.50E-02 |
| SLC4A7  | -2.0 | 2.41E-02 |
| NPL     | -1.9 | 2.41E-02 |
| MAFB    | -1.9 | 5.99E-03 |
| ABCA1   | -1.9 | 5.62E-03 |
| C5      | -1.9 | 1.14E-02 |
| NFATC2  | -1.9 | 4.03E-02 |
| CD48    | -1.9 | 1.09E-02 |
| LRP12   | -1.9 | 2.33E-02 |
| ALDH6A1 | -1.9 | 5.11E-03 |
| SLC25A3 | -1.9 | 2.19E-02 |
| FGL2    | -1.9 | 2.08E-02 |
| DOCK10  | -1.9 | 1.58E-02 |
| SLA-DMA | -1.9 | 1.99E-02 |
| NREP    | -1.9 | 1.71E-02 |
| SATB1   | -1.9 | 1.64E-02 |
| CFL2    | -1.9 | 2.19E-02 |
| CD2     | -1.8 | 9.24E-03 |
| BANK1   | -1.8 | 4.81E-02 |

|          |      |          |
|----------|------|----------|
| LY9      | -1.8 | 4.79E-02 |
| ERAP1    | -1.8 | 3.18E-02 |
| PPAP2B   | -1.8 | 1.44E-02 |
| RBMS1    | -1.8 | 1.68E-02 |
| FRZB     | -1.8 | 3.93E-02 |
| DIXDC1   | -1.8 | 2.08E-02 |
| IGJ      | -1.8 | 1.92E-02 |
| AHCYL2   | -1.8 | 2.15E-02 |
| IGSF5    | -1.8 | 1.18E-02 |
| SLA-3    | -1.8 | 3.72E-02 |
| ITGAE    | -1.8 | 4.27E-02 |
| PTCH1    | -1.8 | 3.72E-02 |
| ITGA4    | -1.7 | 4.03E-02 |
| SCARA5   | -1.7 | 3.55E-02 |
| CDC42EP3 | -1.7 | 4.01E-02 |
| PAG1     | -1.7 | 4.72E-02 |
| SYNE1    | -1.7 | 3.52E-02 |
| KCTD12   | -1.7 | 4.66E-02 |
| CRLF3    | -1.7 | 4.24E-02 |
| COL14A1  | -1.7 | 3.72E-02 |
| MPDZ     | -1.7 | 3.53E-02 |
| CYP7B1   | -1.7 | 4.83E-02 |
| CD109    | -1.7 | 4.15E-02 |
| TSPAN7   | -1.7 | 4.78E-02 |
| SEC11C   | 1.7  | 4.83E-02 |
| MIF      | 1.7  | 4.03E-02 |
| PLA2G16  | 1.8  | 4.03E-02 |
| GLUL     | 1.8  | 4.41E-02 |
| SLC35C1  | 1.8  | 4.89E-02 |
| TARS     | 1.8  | 3.43E-02 |
| MAZ      | 1.8  | 3.53E-02 |
| S100A14  | 1.8  | 2.70E-02 |
| SMARCE1  | 1.8  | 1.98E-02 |
| SERPINB8 | 1.8  | 2.66E-02 |
| FOXA1    | 1.8  | 3.01E-02 |
| PIK3C2A  | 1.8  | 2.22E-02 |
| PMPCA    | 1.8  | 3.50E-02 |
| WDR1     | 1.9  | 4.04E-02 |
| MIR1282  | 1.9  | 2.53E-02 |
| CFL1     | 1.9  | 4.46E-02 |
| IGFBP5   | 1.9  | 2.01E-02 |
| MCF2L    | 1.9  | 1.98E-02 |
| PRTFDC1  | 1.9  | 1.86E-02 |
| NDUFA6   | 1.9  | 1.39E-02 |
| DDX54    | 1.9  | 4.32E-02 |
| MRPL51   | 1.9  | 1.72E-02 |
| LSS      | 1.9  | 3.03E-02 |

|          |     |          |
|----------|-----|----------|
| LRRC59   | 1.9 | 3.60E-02 |
| MKI67    | 1.9 | 1.58E-02 |
| SUMO4    | 1.9 | 3.77E-02 |
| STARD10  | 1.9 | 1.91E-02 |
| BOLA2    | 1.9 | 2.95E-02 |
| PSMB7    | 1.9 | 7.05E-03 |
| SLC39A7  | 1.9 | 9.92E-03 |
| MAGOH    | 1.9 | 1.71E-02 |
| PTN      | 1.9 | 1.03E-02 |
| CNOT3    | 2.0 | 3.50E-02 |
| CENPJ    | 2.0 | 4.45E-02 |
| SKA2     | 2.0 | 9.87E-03 |
| ATOH1    | 2.0 | 2.41E-02 |
| HSD11B1  | 2.0 | 2.19E-02 |
| SMPDL3B  | 2.0 | 1.67E-02 |
| FDPS     | 2.0 | 3.53E-02 |
| SERPINB6 | 2.0 | 1.67E-02 |
| TIMM17A  | 2.0 | 1.40E-02 |
| SLC25A1  | 2.0 | 4.03E-02 |
| CXCL16   | 2.0 | 2.89E-03 |
| LRRC8A   | 2.0 | 1.64E-02 |
| SEMA7A   | 2.1 | 2.41E-02 |
| PSTPIP2  | 2.1 | 5.66E-03 |
| GADD45B  | 2.1 | 4.75E-02 |
| SMAGP    | 2.1 | 4.78E-02 |
| ARHGDI1  | 2.1 | 1.87E-02 |
| HDLBP    | 2.1 | 1.81E-02 |
| UAP1L1   | 2.1 | 1.98E-02 |
| ERN2     | 2.1 | 1.54E-02 |
| DPP9     | 2.1 | 5.03E-03 |
| TGM2     | 2.2 | 7.15E-03 |
| SERPINB5 | 2.2 | 1.56E-03 |
| PYCR1    | 2.2 | 4.03E-02 |
| BCL3     | 2.2 | 2.84E-03 |
| PKM      | 2.2 | 2.62E-02 |
| DPRX     | 2.2 | 1.71E-02 |
| TRAPPC6A | 2.2 | 4.81E-02 |
| TUBA1C   | 2.2 | 3.01E-02 |
| TMEM54   | 2.2 | 1.11E-02 |
| CDH1     | 2.2 | 3.28E-03 |
| AREG     | 2.2 | 8.37E-03 |
| ROS1     | 2.2 | 8.87E-04 |
| RIPK3    | 2.3 | 1.33E-02 |
| UBE2S    | 2.3 | 2.19E-02 |
| CCNB2    | 2.3 | 3.45E-04 |
| ADAMTS1  | 2.3 | 4.06E-04 |
| B3GNT6   | 2.3 | 7.21E-03 |

|          |     |          |
|----------|-----|----------|
| ABCA12   | 2.3 | 4.40E-02 |
| CABIN1   | 2.3 | 1.96E-03 |
| FFAR4    | 2.3 | 2.68E-02 |
| MYBL2    | 2.4 | 3.34E-03 |
| P2RX4    | 2.4 | 8.14E-04 |
| CYP2B22  | 2.4 | 4.65E-02 |
| ND1      | 2.4 | 1.59E-03 |
| LIPH     | 2.4 | 1.88E-04 |
| TACC3    | 2.4 | 6.84E-03 |
| DEPDC7   | 2.4 | 3.67E-02 |
| GCNT3    | 2.4 | 4.06E-04 |
| IL1A     | 2.4 | 1.55E-03 |
| HMGA1    | 2.4 | 5.03E-03 |
| FAM20C   | 2.4 | 2.79E-02 |
| BGN      | 2.5 | 1.81E-02 |
| HSPA1L   | 2.5 | 4.83E-02 |
| PFKFB3   | 2.5 | 7.15E-03 |
| GALNT6   | 2.5 | 5.55E-03 |
| TNFRSF26 | 2.5 | 2.44E-02 |
| NT5DC2   | 2.5 | 2.37E-02 |
| CSRP2    | 2.5 | 1.20E-02 |
| PTPRN2   | 2.5 | 3.72E-02 |
| BIRC5    | 2.6 | 1.37E-03 |
| KCNE3    | 2.6 | 3.51E-05 |
| FGF7     | 2.6 | 5.67E-04 |
| TUBB3    | 2.6 | 2.11E-03 |
| ITGB6    | 2.6 | 7.63E-03 |
| GSTA1    | 2.7 | 4.73E-02 |
| CDX1     | 2.7 | 1.73E-03 |
| PNP      | 2.7 | 1.83E-03 |
| KCNJ11   | 2.7 | 3.31E-02 |
| TPSB2    | 2.8 | 2.68E-02 |
| RRBP1    | 2.8 | 8.06E-05 |
| PHLDA2   | 2.8 | 2.79E-03 |
| MDK      | 2.8 | 4.44E-04 |
| FCN2     | 2.9 | 9.94E-05 |
| CAPNS2   | 2.9 | 2.12E-03 |
| PLA2G3   | 2.9 | 4.90E-03 |
| SPDEF    | 3.0 | 1.13E-04 |
| BPIFB2   | 3.0 | 3.18E-02 |
| LAMB3    | 3.0 | 6.87E-04 |
| ME1      | 3.1 | 9.19E-03 |
| FUT2     | 3.1 | 1.38E-03 |
| F3       | 3.1 | 4.09E-05 |
| ETV4     | 3.1 | 4.03E-02 |
| ABAT     | 3.2 | 1.73E-05 |
| SLC7A5   | 3.3 | 1.30E-03 |

|           |     |          |
|-----------|-----|----------|
| FABP3     | 3.3 | 3.51E-08 |
| HK2       | 3.3 | 1.33E-05 |
| STEAP4    | 3.4 | 5.33E-03 |
| CLDN8     | 3.5 | 1.41E-02 |
| CLCA1     | 3.5 | 9.80E-09 |
| PRKCG     | 3.5 | 4.38E-02 |
| SERPINB10 | 3.5 | 2.87E-04 |
| DIO2      | 3.5 | 1.15E-03 |
| DNAH8     | 3.7 | 3.59E-02 |
| IGFBP4    | 3.7 | 6.25E-07 |
| TNFSF18   | 3.8 | 3.17E-02 |
| NRG1      | 3.8 | 2.41E-02 |
| TIMP1     | 3.9 | 2.94E-04 |
| LOC396756 | 4.0 | 1.51E-06 |
| PTGS2     | 4.0 | 1.30E-07 |
| TNFRSF8   | 4.0 | 2.04E-02 |
| SLC9C1    | 4.1 | 7.81E-04 |
| CHI3L2    | 4.2 | 4.97E-04 |
| GNMT      | 4.3 | 2.10E-02 |
| AKR1C4    | 4.3 | 2.30E-05 |
| SLC7A11   | 4.3 | 6.75E-07 |
| TLE6      | 4.4 | 1.34E-02 |
| CXCL14    | 4.4 | 2.73E-06 |
| PDZK1IP1L | 4.5 | 1.44E-02 |
| CXCL17    | 4.5 | 7.44E-06 |
| TNIP3     | 4.5 | 5.90E-06 |
| BAALC     | 4.5 | 3.96E-03 |
| BDKRB1    | 4.6 | 1.70E-02 |
| PI3       | 4.6 | 2.55E-08 |
| KRT18     | 4.7 | 7.48E-10 |
| SAPCD2    | 4.7 | 1.19E-03 |
| PLAUR     | 4.8 | 6.11E-06 |
| SLPI      | 4.8 | 2.22E-11 |
| COL28A1   | 4.9 | 5.31E-06 |
| MMP3      | 4.9 | 3.31E-10 |
| PHGDH     | 5.0 | 9.01E-04 |
| IL17C     | 5.0 | 7.15E-03 |
| SLC5A8    | 5.0 | 1.13E-04 |
| GSTA2     | 5.4 | 4.30E-03 |
| BTN1A1L2* | 5.4 | 2.54E-02 |
| CA4       | 5.5 | 9.51E-10 |
| CBS       | 5.5 | 7.18E-05 |
| AGR2      | 5.6 | 1.73E-11 |
| SDS       | 5.7 | 8.06E-05 |
| MIR6087   | 6.0 | 1.14E-02 |
| IL1R2     | 6.1 | 1.51E-06 |
| MUC2      | 6.3 | 2.16E-16 |

|            |       |          |
|------------|-------|----------|
| CHI3L1     | 6.4   | 1.03E-13 |
| B3GNT7     | 6.4   | 1.16E-05 |
| UPK1B      | 6.5   | 1.59E-03 |
| TAT        | 6.9   | 3.49E-02 |
| GSTP1L2*   | 6.9   | 3.53E-02 |
| RNF39      | 7.0   | 1.51E-06 |
| IL36A      | 7.2   | 2.58E-03 |
| MMP1       | 7.3   | 6.53E-13 |
| TCN1       | 8.0   | 1.44E-10 |
| SPINK4     | 8.1   | 9.43E-22 |
| S100A8     | 8.2   | 1.02E-02 |
| MPTX       | 8.3   | 4.03E-15 |
| SERPINB11  | 8.4   | 7.38E-04 |
| SLCO1A2    | 8.6   | 6.00E-04 |
| SP6        | 9.3   | 1.01E-02 |
| HCAR2      | 9.3   | 6.76E-05 |
| MMP9       | 9.3   | 1.00E-02 |
| ADAM30     | 9.6   | 8.58E-03 |
| MMP12      | 9.7   | 4.45E-16 |
| S100A9     | 9.8   | 1.83E-03 |
| TGM3       | 10.0  | 3.03E-05 |
| S100A2     | 10.0  | 3.03E-27 |
| REG4       | 11.1  | 8.84E-20 |
| IGHG1      | 11.1  | 3.80E-06 |
| HTR1B      | 11.8  | 2.40E-02 |
| GYS2       | 11.9  | 5.62E-03 |
| S100A12    | 12.8  | 4.09E-05 |
| PDZK1IP1*  | 13.6  | 1.24E-05 |
| AKR1C1     | 13.8  | 3.93E-07 |
| GABRP      | 15.7  | 1.59E-03 |
| A2ML1      | 16.0  | 2.14E-03 |
| SERPINB2   | 16.2  | 4.90E-32 |
| SLC6A2     | 18.7  | 1.53E-02 |
| PSAT1      | 20.6  | 4.69E-11 |
| IL11       | 21.6  | 6.84E-03 |
| TFF1       | 25.9  | 2.62E-06 |
| MMP13      | 27.5  | 9.71E-29 |
| ARG1       | 30.1  | 2.28E-07 |
| IL36B      | 30.8  | 1.02E-02 |
| ANXA8      | 34.8  | 6.97E-40 |
| TFF2       | 37.1  | 6.93E-10 |
| MMP7       | 53.1  | 4.09E-05 |
| IFITM1L3*  | 63.2  | 1.59E-02 |
| HOXB13     | 132.7 | 1.59E-02 |
| SLC7A3L11* | 188.2 | 1.59E-03 |
| IL4I1L     | 437.7 | 1.59E-14 |

Supplemental Table S4. Comparison of pigs at 52 days after inoculation with no worms compared to control uninfected pigs

| Feature ID | FC Naive vs Infection No Worms | EDGE test: FDR p-value correction |
|------------|--------------------------------|-----------------------------------|
| LCN15      | -32.1                          | 3.66E-07                          |
| ALPI       | -4.9                           | 5.20E-03                          |
| CD5L       | -4.7                           | 6.80E-03                          |
| PON1       | -4.5                           | 4.13E-02                          |
| SLC10A2    | -4.3                           | 4.13E-02                          |
| SDR9C7     | -4.2                           | 2.26E-02                          |
| CYP2B22    | -3.9                           | 2.23E-02                          |
| ACSL6      | -3.7                           | 9.52E-03                          |
| GSTA2      | -3.6                           | 5.23E-02                          |
| GDF5       | -3.3                           | 1.09E-03                          |
| SCNN1B     | -3.3                           | 2.26E-02                          |
| ALPIL1     | -3.1                           | 3.58E-02                          |
| GAL        | -3.1                           | 1.57E-02                          |
| PCK1       | -3.1                           | 1.86E-02                          |
| PDK4       | -3.0                           | 3.61E-02                          |
| NCR1       | -2.9                           | 2.48E-04                          |
| SLC24A1    | -2.9                           | 1.16E-03                          |
| RDH16      | -2.8                           | 4.89E-02                          |
| ACE2       | -2.6                           | 4.67E-02                          |
| SLC38A4    | -2.6                           | 5.46E-04                          |
| VGF        | -2.6                           | 2.96E-03                          |
| ANPEP      | -2.5                           | 4.13E-02                          |
| GPIHBP1    | -2.5                           | 3.06E-02                          |
| NCR2       | -2.5                           | 4.13E-02                          |
| TREM2      | -2.5                           | 4.89E-02                          |
| GPR162     | -2.3                           | 3.71E-02                          |
| NKPD1      | -2.3                           | 2.48E-03                          |
| NR1H4      | -2.3                           | 2.51E-02                          |
| EOMES      | -2.2                           | 3.65E-02                          |
| THNSL2     | -2.2                           | 2.04E-04                          |
| CIRBP      | -2.1                           | 6.57E-05                          |
| KLRD1L*    | -2.1                           | 2.36E-02                          |
| ANGPTL4    | -2.0                           | 4.70E-02                          |
| CA12       | -2.0                           | 3.03E-03                          |
| KLF11      | -2.0                           | 4.37E-02                          |
| SIRPB2     | -2.0                           | 3.09E-02                          |
| GSTM1      | -1.9                           | 9.10E-03                          |
| SMIM6      | -1.9                           | 4.13E-02                          |
| GSTM4      | -1.8                           | 5.07E-03                          |
| GSTT1      | -1.8                           | 4.13E-02                          |
| PYCARD     | -1.8                           | 1.54E-02                          |
| SLC24A4    | -1.8                           | 4.67E-02                          |
| SLC46A3    | -1.8                           | 2.05E-03                          |
| BDH1       | -1.7                           | 5.79E-03                          |
| CD8A       | -1.7                           | 5.31E-02                          |
| CES1B*     | -1.7                           | 7.07E-03                          |
| CLEC3B     | -1.7                           | 7.15E-03                          |
| H1F0       | -1.7                           | 6.99E-03                          |
| KCNE3      | -1.7                           | 1.16E-03                          |
| METTL7A    | -1.7                           | 3.83E-03                          |
| SLC16A14   | -1.7                           | 1.09E-02                          |
| THAP8      | -1.7                           | 4.86E-02                          |
| A1CF       | -1.6                           | 1.73E-02                          |
| ADGRE4     | -1.6                           | 2.26E-02                          |
| C1QB       | -1.6                           | 5.22E-02                          |
| GSTZ1      | -1.6                           | 1.03E-02                          |
| PDK2       | -1.6                           | 1.50E-02                          |
| PLCD1      | -1.6                           | 1.46E-02                          |

|           |      |          |
|-----------|------|----------|
| PNPLA2    | -1.6 | 1.01E-02 |
| SLC43A2   | -1.6 | 2.36E-02 |
| TMEM140   | -1.6 | 1.73E-02 |
| UGT2C1*   | -1.6 | 4.13E-02 |
| COQ8A     | -1.5 | 1.73E-02 |
| ARRDC3    | -1.5 | 4.39E-02 |
| FDXR      | -1.5 | 2.76E-02 |
| HADHA     | -1.5 | 1.16E-03 |
| ODC1      | -1.5 | 1.27E-02 |
| SULT1B1   | -1.5 | 3.48E-02 |
| TSPAN7    | -1.5 | 3.87E-02 |
| SNX19     | 1.5  | 3.48E-02 |
| RASA2     | 1.5  | 8.65E-03 |
| SKIL      | 1.5  | 1.47E-02 |
| SLC12A4   | 1.5  | 1.59E-03 |
| EPAS1     | 1.5  | 1.29E-02 |
| HSPA2     | 1.6  | 5.31E-02 |
| COL12A1   | 1.6  | 4.13E-02 |
| PRDM2     | 1.6  | 7.04E-03 |
| GJA1      | 1.7  | 4.40E-02 |
| APOBR     | 1.7  | 3.48E-02 |
| SAMSN1    | 1.7  | 1.85E-02 |
| PIK3C2A   | 1.7  | 5.31E-02 |
| CD33      | 1.7  | 2.79E-02 |
| AOAH      | 1.7  | 2.02E-02 |
| PTGS1     | 1.7  | 6.80E-03 |
| CDR2      | 1.7  | 1.47E-02 |
| ANKRD12   | 1.7  | 2.76E-02 |
| HYOU1     | 1.7  | 1.73E-02 |
| NFIL3     | 1.7  | 1.50E-04 |
| SERPINH1  | 1.8  | 4.70E-02 |
| GRAP      | 1.8  | 2.00E-02 |
| SLC26A2   | 1.8  | 5.24E-02 |
| CHORDC1   | 1.8  | 8.64E-03 |
| GPR68     | 1.8  | 6.99E-03 |
| LPCAT2    | 1.9  | 2.33E-03 |
| GPR65     | 1.9  | 3.09E-02 |
| HSPA5     | 1.9  | 2.26E-02 |
| ALOX5AP   | 2.0  | 3.09E-02 |
| NOV       | 2.0  | 3.48E-02 |
| TNFRSF12A | 2.0  | 2.26E-02 |
| DOCK2     | 2.0  | 7.80E-03 |
| GATA2     | 2.0  | 5.31E-02 |
| COL8A1    | 2.0  | 3.85E-02 |
| SFRP1     | 2.1  | 2.80E-03 |
| DNAJA1    | 2.1  | 5.20E-03 |
| SLCO4A1   | 2.1  | 1.73E-02 |
| F13A1     | 2.1  | 7.07E-03 |
| CD69      | 2.1  | 4.85E-03 |
| SRGN      | 2.1  | 1.18E-05 |
| ARNTL2    | 2.1  | 3.38E-02 |
| GFI1      | 2.2  | 1.03E-02 |
| RUNX3     | 2.2  | 5.12E-03 |
| IGHE      | 2.3  | 4.86E-02 |
| KIT       | 2.3  | 1.73E-02 |
| IPCEF1    | 2.4  | 1.03E-02 |
| SLC16A3   | 2.4  | 2.50E-03 |
| CD244     | 2.4  | 1.29E-02 |
| NLRC3     | 2.5  | 1.97E-02 |
| SELE      | 2.5  | 3.53E-02 |

|           |       |          |
|-----------|-------|----------|
| MAP4K1    | 2.5   | 2.73E-04 |
| GZMAL     | 2.5   | 1.01E-02 |
| TDRP1     | 2.6   | 5.04E-03 |
| HSPA1L    | 2.6   | 5.31E-02 |
| SLC2A3    | 2.7   | 1.71E-10 |
| HSPH1     | 2.7   | 1.29E-02 |
| HDC       | 2.7   | 2.39E-02 |
| GPR97     | 2.8   | 2.26E-02 |
| FGR       | 2.8   | 6.51E-07 |
| LTC4S     | 2.8   | 1.24E-02 |
| TIGIT     | 2.8   | 3.39E-04 |
| CSF2RAL   | 2.9   | 4.86E-02 |
| GZMA      | 3.0   | 4.54E-04 |
| CXCL6     | 3.1   | 1.01E-02 |
| MMP9      | 3.4   | 3.03E-03 |
| SH2D1B    | 3.5   | 4.91E-04 |
| FFAR2     | 3.6   | 1.18E-05 |
| TIAM1     | 4.4   | 6.67E-08 |
| GATA3     | 4.4   | 4.43E-04 |
| IGFBP2    | 4.7   | 1.99E-08 |
| SLC5A8    | 4.8   | 3.38E-02 |
| GPRC5D    | 4.8   | 9.86E-03 |
| DFNB31    | 4.9   | 7.93E-05 |
| DIO2      | 5.8   | 1.16E-03 |
| NXPH4     | 5.8   | 2.70E-06 |
| TKTL1     | 6.4   | 1.49E-02 |
| SLC4A11   | 6.9   | 1.04E-03 |
| CTSG      | 7.2   | 8.45E-07 |
| MMP12     | 7.3   | 1.09E-03 |
| KLRJ1*    | 9.6   | 1.59E-03 |
| SNORA73AL | 10.4  | 2.01E-02 |
| NTRK1     | 10.6  | 3.53E-03 |
| GZMB      | 11.2  | 8.54E-08 |
| TCN1      | 19.2  | 1.29E-02 |
| TNN       | 83.7  | 5.30E-05 |
| GNLY      | 132.0 | 2.98E-11 |
| REG3A     | 168.9 | 2.26E-02 |

Supplemental Table S5. Comparison of DEGs expressed in the proximal colon of pigs at 52 days after inoculation with worms compared to uninfected controls.

| Gene     | Fold change | EDGE FDR p-value |
|----------|-------------|------------------|
| SLC10A2  | -1285.8     | 8.30E-08         |
| ALPI     | -159.7      | 2.09E-10         |
| EVX1     | -38.1       | 2.47E-02         |
| ASTL     | -37.2       | 2.34E-02         |
| CLCA4    | -27.9       | 1.34E-07         |
| ALDOB    | -27.7       | 2.35E-07         |
| GSTA2    | -26.6       | 8.94E-06         |
| CYP2B22  | -26.4       | 2.38E-06         |
| BTNL2    | -21.7       | 9.02E-03         |
| HMGCS2   | -21.2       | 0.00E+00         |
| NXPE2    | -20.1       | 2.40E-06         |
| NR1H4    | -17.1       | 2.31E-11         |
| PCK1     | -16.9       | 1.62E-07         |
| FRMD1    | -15.5       | 9.59E-05         |
| OASL     | -14.4       | 5.68E-03         |
| SLC14A1  | -13.9       | 1.46E-02         |
| FOXO6    | -13.7       | 8.20E-06         |
| AQP8     | -13.7       | 2.47E-03         |
| SLC26A3  | -12.7       | 8.30E-08         |
| NCR2     | -12.1       | 1.81E-05         |
| CD5L     | -10.9       | 8.19E-04         |
| THAP12   | -10.5       | 4.27E-02         |
| ALPIL1*  | -10.3       | 1.67E-04         |
| SLC30A10 | -10.2       | 3.00E-03         |
| SDR9C7   | -9.3        | 8.99E-03         |
| MOGAT2   | -9.2        | 1.14E-03         |
| AGT      | -8.7        | 1.64E-05         |
| PADI2    | -8.6        | 1.42E-09         |
| GRIK1    | -8.6        | 4.27E-02         |
| HAS3     | -8.4        | 9.20E-06         |
| SULT1E1  | -8.2        | 1.08E-09         |
| SI       | -7.9        | 8.57E-03         |
| SLC25A34 | -7.8        | 1.41E-09         |
| COL6A6   | -7.8        | 1.07E-07         |
| SLC38A4  | -7.7        | 3.14E-09         |
| PDK4     | -7.7        | 2.11E-04         |
| LCN15    | -7.6        | 4.90E-02         |
| ABCG2    | -7.6        | 6.40E-07         |
| CXCL9    | -7.5        | 6.02E-04         |
| CEACAM8  | -7.5        | 1.20E-02         |
| NCR1     | -7.2        | 1.19E-06         |
| SLC51A   | -6.9        | 2.76E-08         |
| P2RX3    | -6.5        | 3.20E-05         |
| ABCA6    | -6.5        | 3.05E-06         |
| GUCA2A   | -6.3        | 2.26E-05         |
| TM6SF2   | -6.3        | 2.26E-14         |
| CA12     | -6.2        | 4.33E-13         |
| DNAI1    | -6.1        | 1.42E-02         |
| RDH16    | -6.1        | 3.20E-03         |
| TRPV6    | -6.0        | 4.34E-02         |
| IFI27    | -5.8        | 7.91E-04         |
| SSTR5    | -5.7        | 4.20E-03         |
| SLC16A1  | -5.7        | 0.00E+00         |
| CA1      | -5.6        | 4.33E-12         |
| CCL3L2   | -5.4        | 6.08E-03         |
| GABRB2   | -5.4        | 4.12E-06         |
| GPIHBP1  | -5.3        | 6.94E-04         |
| ANPEP    | -5.2        | 3.11E-04         |
| XCL1     | -5.2        | 1.96E-06         |
| CYP26B1  | -5.0        | 2.61E-08         |
| IGF2-AS  | -5.0        | 1.71E-02         |
| OPRL1    | -4.9        | 3.95E-04         |
| PIPOX    | -4.9        | 6.45E-03         |
| EOMES    | -4.8        | 1.12E-04         |
| FOXJ1    | -4.8        | 4.62E-03         |
| CXCL11   | -4.8        | 3.33E-02         |
| IL12B    | -4.7        | 1.02E-02         |
| CLEC4F   | -4.6        | 4.26E-02         |
| DACT2    | -4.6        | 4.67E-02         |
| EDN3     | -4.6        | 7.22E-03         |
| SLC24A4  | -4.4        | 2.68E-06         |
| RSAD2    | -4.4        | 2.06E-02         |

|          |      |          |
|----------|------|----------|
| SELENBP1 | -4.4 | 1.11E-11 |
| ADIPOQ   | -4.2 | 5.00E-04 |
| CD207    | -4.2 | 4.37E-02 |
| KLF11    | -4.2 | 3.47E-05 |
| CHP2     | -4.1 | 1.38E-07 |
| UGT2C1*  | -4.1 | 8.74E-11 |
| DLX4     | -4.1 | 2.69E-03 |
| ABCA8    | -4.1 | 3.01E-03 |
| CLDN10   | -4.1 | 3.30E-03 |
| PLIN1    | -4.0 | 3.06E-02 |
| PARP15   | -4.0 | 3.90E-04 |
| GZMK     | -4.0 | 1.31E-02 |
| SCNN1B   | -3.8 | 3.19E-02 |
| GPR162   | -3.8 | 1.31E-03 |
| WNT8B    | -3.8 | 2.30E-04 |
| DLX3     | -3.8 | 2.11E-02 |
| GDF5     | -3.8 | 1.25E-02 |
| FOXS1    | -3.8 | 3.26E-05 |
| FABP1    | -3.7 | 5.00E-05 |
| KLRD1L   | -3.7 | 1.90E-04 |
| HSD17B6  | -3.7 | 1.19E-02 |
| CD36     | -3.7 | 8.88E-09 |
| CIDEA    | -3.6 | 1.99E-03 |
| CTBS     | -3.6 | 8.38E-03 |
| SLC25A42 | -3.6 | 1.96E-06 |
| RNF112   | -3.5 | 1.01E-03 |
| VIP      | -3.5 | 5.68E-03 |
| CNTFR    | -3.5 | 4.40E-04 |
| IRF4L    | -3.4 | 5.23E-03 |
| SIGLEC15 | -3.4 | 5.06E-02 |
| CXCL10   | -3.4 | 3.22E-02 |
| SECTM1   | -3.4 | 1.23E-03 |
| ZBP1     | -3.4 | 5.56E-04 |
| DHX58    | -3.3 | 7.59E-03 |
| SELENOP  | -3.3 | 2.97E-08 |
| ISX      | -3.3 | 2.28E-03 |
| IGF2     | -3.2 | 5.66E-04 |
| PRSS12   | -3.2 | 1.43E-04 |
| XAF1     | -3.2 | 5.31E-02 |
| ABI3BP   | -3.2 | 4.50E-05 |
| SLC30A3  | -3.1 | 8.38E-03 |
| LYPD6    | -3.1 | 7.55E-03 |
| CLCA4L   | -3.1 | 1.92E-02 |
| SLC7A8   | -3.1 | 2.76E-05 |
| NECAB2   | -3.1 | 1.88E-02 |
| GSTM1    | -3.0 | 2.39E-05 |
| AOC1     | -3.0 | 3.91E-07 |
| ABCA9    | -3.0 | 3.15E-02 |
| GAL      | -3.0 | 4.97E-02 |
| CCR9     | -3.0 | 5.47E-02 |
| ASPA     | -2.9 | 4.20E-03 |
| ANGPTL4  | -2.9 | 1.19E-03 |
| GSTM4    | -2.9 | 3.46E-06 |
| IFI44    | -2.9 | 1.80E-02 |
| PRDX6    | -2.9 | 1.45E-07 |
| SLC35D3  | -2.9 | 3.46E-02 |
| BDH1     | -2.9 | 4.31E-08 |
| TMPRSS13 | -2.8 | 1.67E-02 |
| CARD14   | -2.8 | 6.03E-05 |
| AHRR     | -2.8 | 3.02E-04 |
| FBXO32   | -2.8 | 1.02E-04 |
| SIRPB2   | -2.8 | 6.49E-03 |
| CD209    | -2.8 | 1.42E-03 |
| SLC46A3  | -2.8 | 2.40E-06 |
| ACSBG1   | -2.8 | 4.00E-02 |
| SLC7A3L6 | -2.8 | 1.70E-02 |
| CD4      | -2.8 | 1.41E-04 |
| CXCL12   | -2.7 | 6.31E-04 |
| NMRAL1L* | -2.7 | 1.81E-02 |
| FAAH     | -2.7 | 6.61E-04 |
| UGT1A3   | -2.7 | 2.57E-02 |
| CA11     | -2.7 | 7.55E-03 |
| FABP4    | -2.7 | 1.86E-02 |
| NGB      | -2.7 | 3.12E-02 |

|              |      |          |
|--------------|------|----------|
| ZFP84L       | -2.7 | 3.53E-03 |
| ABCB4        | -2.7 | 2.10E-02 |
| LRP1B        | -2.7 | 1.12E-02 |
| MAOA         | -2.7 | 1.11E-07 |
| LILRB3L4     | -2.7 | 2.84E-02 |
| MAMDC2       | -2.7 | 2.50E-03 |
| WNT11        | -2.7 | 1.51E-02 |
| GRIK4        | -2.7 | 1.76E-02 |
| SLC8A2       | -2.7 | 2.11E-02 |
| PTPRD        | -2.6 | 1.41E-04 |
| ACE          | -2.6 | 7.25E-05 |
| SLC7A3L4     | -2.6 | 4.44E-03 |
| TXNIP        | -2.6 | 5.39E-05 |
| GBP6         | -2.6 | 5.25E-03 |
| GSTT1        | -2.6 | 1.25E-03 |
| AURKC        | -2.6 | 3.68E-03 |
| UBE2L6       | -2.6 | 1.15E-04 |
| P2RY13       | -2.6 | 6.61E-04 |
| ADGRB1       | -2.6 | 1.64E-02 |
| IFITM1       | -2.6 | 1.45E-02 |
| C1QB         | -2.6 | 4.13E-05 |
| C11orf86     | -2.5 | 4.92E-04 |
| SULT1C4      | -2.5 | 1.40E-04 |
| CD74         | -2.5 | 2.92E-04 |
| ZKSCAN2      | -2.5 | 4.12E-02 |
| KLRC1        | -2.5 | 2.35E-02 |
| CIRBP        | -2.5 | 3.91E-05 |
| IL34         | -2.5 | 3.63E-04 |
| ADGRE4       | -2.4 | 9.29E-06 |
| GBP2         | -2.4 | 1.02E-02 |
| AHCYL2       | -2.4 | 5.80E-06 |
| SLC7A3L7     | -2.4 | 3.11E-02 |
| SCARA5       | -2.4 | 2.08E-02 |
| DBP          | -2.4 | 3.71E-03 |
| PLCD1        | -2.4 | 1.77E-06 |
| GBP4         | -2.4 | 4.83E-02 |
| COL4A3       | -2.4 | 4.44E-02 |
| SLA-DRA      | -2.4 | 1.06E-03 |
| ADGB         | -2.4 | 3.63E-02 |
| TMPRSS2      | -2.4 | 1.23E-04 |
| SLA-DOA      | -2.4 | 3.71E-03 |
| TMEM140      | -2.4 | 2.01E-06 |
| CCL4         | -2.4 | 1.16E-02 |
| APOL2        | -2.4 | 1.75E-04 |
| RBP5         | -2.4 | 5.79E-03 |
| PNPLA2       | -2.4 | 1.05E-06 |
| ANK3         | -2.4 | 8.67E-03 |
| TLR8         | -2.3 | 1.46E-03 |
| C1QA         | -2.3 | 4.91E-05 |
| ANKH         | -2.3 | 7.37E-03 |
| C1QC         | -2.3 | 5.39E-05 |
| SLC39A5      | -2.3 | 3.63E-02 |
| IL12RB2      | -2.3 | 4.34E-02 |
| TUBAL3       | -2.3 | 3.93E-02 |
| CD83         | -2.3 | 1.40E-02 |
| IHH          | -2.3 | 3.41E-05 |
| THNSL2       | -2.3 | 1.15E-03 |
| HAPLN4       | -2.3 | 1.17E-04 |
| SLA-3        | -2.3 | 1.89E-04 |
| ADRB1        | -2.3 | 1.40E-03 |
| VEGF         | -2.3 | 3.28E-02 |
| IFITM1L2*    | -2.3 | 6.10E-05 |
| SLC46A2      | -2.3 | 6.48E-03 |
| HOXD10       | -2.3 | 8.74E-03 |
| IFI44L       | -2.3 | 3.75E-03 |
| SLA-11       | -2.3 | 1.08E-04 |
| PCSK6        | -2.3 | 1.07E-05 |
| CD300H       | -2.3 | 1.10E-05 |
| LOC106509843 | -2.3 | 1.93E-02 |
| SLA-DQA1     | -2.3 | 3.27E-03 |
| SLA-DQB1     | -2.3 | 1.13E-02 |
| CD36L1       | -2.3 | 2.24E-03 |
| ABCC6        | -2.2 | 4.92E-02 |
| MAF          | -2.2 | 1.08E-04 |

|              |      |          |
|--------------|------|----------|
| RETSAT       | -2.2 | 4.10E-06 |
| FCGR3A       | -2.2 | 8.60E-05 |
| LGALS9       | -2.2 | 2.92E-04 |
| SLA-DMB      | -2.2 | 8.10E-04 |
| CD8A         | -2.2 | 4.54E-03 |
| ZNF419       | -2.2 | 3.82E-02 |
| CD300C       | -2.2 | 5.26E-03 |
| LTBP4        | -2.2 | 9.11E-05 |
| CD27         | -2.2 | 4.87E-02 |
| PTPRO        | -2.2 | 3.59E-02 |
| EDIL3        | -2.2 | 2.93E-03 |
| CD7          | -2.2 | 4.61E-02 |
| ABCB1        | -2.2 | 2.05E-03 |
| PARP9        | -2.2 | 1.66E-04 |
| SLA-DRB1     | -2.2 | 5.60E-03 |
| PTCH1        | -2.2 | 1.80E-03 |
| EFNA3        | -2.2 | 2.20E-02 |
| TSPAN7       | -2.2 | 5.07E-06 |
| TST          | -2.2 | 3.80E-05 |
| TLR1         | -2.2 | 8.67E-04 |
| CXCR3        | -2.2 | 1.38E-02 |
| CYP7B1       | -2.2 | 9.83E-03 |
| COQ8A        | -2.2 | 9.79E-06 |
| MPEG1        | -2.2 | 4.93E-03 |
| KLHL7        | -2.1 | 2.73E-04 |
| NT5E         | -2.1 | 1.30E-02 |
| CES1B        | -2.1 | 5.66E-04 |
| P2RY12       | -2.1 | 5.25E-02 |
| ACSF2        | -2.1 | 6.81E-06 |
| NKPD1        | -2.1 | 4.23E-02 |
| LY9L1*       | -2.1 | 4.13E-03 |
| CYP2C91      | -2.1 | 5.29E-02 |
| CDKN2B       | -2.1 | 1.87E-04 |
| H1FO         | -2.1 | 7.02E-04 |
| LOC110255453 | -2.1 | 4.34E-02 |
| FOXH1        | -2.1 | 3.28E-02 |
| ADAMTSL5     | -2.1 | 3.76E-02 |
| CST3         | -2.1 | 1.99E-03 |
| ABCB6        | -2.1 | 2.65E-05 |
| SLC16A5      | -2.1 | 1.59E-03 |
| PARP14       | -2.1 | 1.16E-02 |
| LTB4R2       | -2.1 | 3.08E-02 |
| CASP1        | -2.1 | 9.13E-04 |
| LIFR         | -2.1 | 4.05E-04 |
| SLC25A20     | -2.1 | 1.13E-04 |
| SLC25A27     | -2.1 | 1.55E-05 |
| METTL7A      | -2.1 | 1.05E-04 |
| SLA-DMA      | -2.1 | 4.61E-03 |
| CTSD         | -2.1 | 3.64E-04 |
| ZNF548       | -2.1 | 1.71E-02 |
| TMPRSS4      | -2.1 | 4.56E-05 |
| PLCB2        | -2.0 | 1.74E-03 |
| MLYCD        | -2.0 | 1.50E-03 |
| CECR1        | -2.0 | 4.20E-03 |
| CSMD1        | -2.0 | 3.76E-02 |
| AMT          | -2.0 | 3.33E-04 |
| GFRA1        | -2.0 | 4.61E-02 |
| CPT1A        | -2.0 | 2.94E-03 |
| KLRG1        | -2.0 | 5.07E-02 |
| WNT2B        | -2.0 | 3.42E-03 |
| PFKFB4       | -2.0 | 4.11E-05 |
| COBL         | -2.0 | 2.96E-06 |
| EXOC3L4      | -2.0 | 4.81E-04 |
| PKNOX2       | -2.0 | 2.25E-02 |
| MMP11        | -2.0 | 7.40E-04 |
| LAIR1        | -2.0 | 7.37E-03 |
| TLR5         | -2.0 | 4.03E-02 |
| CDH23        | -2.0 | 4.71E-02 |
| B2M          | -2.0 | 5.66E-04 |
| MDK          | -2.0 | 1.75E-02 |
| ABCC4L2      | -2.0 | 8.20E-03 |
| UGT1A1       | -2.0 | 1.54E-02 |
| NADK         | -2.0 | 5.86E-05 |
| TLR6         | -2.0 | 4.77E-03 |

|           |      |          |
|-----------|------|----------|
| EBI3      | -2.0 | 4.52E-02 |
| FBXW10    | -2.0 | 2.07E-02 |
| GBP1      | -1.9 | 5.21E-02 |
| SLC9A2    | -1.9 | 1.78E-04 |
| LGALS3BP  | -1.9 | 3.18E-02 |
| TSPAN11   | -1.9 | 4.35E-03 |
| SLC25A38  | -1.9 | 4.57E-04 |
| RGS10     | -1.9 | 2.55E-02 |
| OSBPL10   | -1.9 | 6.89E-03 |
| ZNF664    | -1.9 | 6.81E-05 |
| TAP1      | -1.9 | 5.73E-03 |
| CSTA      | -1.9 | 2.56E-02 |
| PYCARD    | -1.9 | 8.72E-03 |
| NCAM1     | -1.9 | 3.06E-02 |
| TCF7L1    | -1.9 | 2.24E-02 |
| BSG       | -1.9 | 1.92E-04 |
| ADHFE1    | -1.9 | 4.54E-02 |
| PIK3IP1   | -1.9 | 1.62E-03 |
| PGF       | -1.9 | 4.93E-02 |
| THAP8     | -1.9 | 4.60E-02 |
| ITIH5     | -1.9 | 1.46E-02 |
| IL10RA    | -1.9 | 8.53E-04 |
| CLEC3B    | -1.9 | 2.18E-03 |
| GLI2      | -1.9 | 3.33E-02 |
| ERBB2     | -1.9 | 1.33E-03 |
| SDPR      | -1.9 | 1.59E-02 |
| MT-CO3    | -1.9 | 4.64E-03 |
| SPIDR     | -1.9 | 2.85E-04 |
| OGDH      | -1.9 | 8.27E-05 |
| NOXO1     | -1.9 | 1.71E-03 |
| PDK2      | -1.9 | 1.11E-03 |
| TRANK1    | -1.9 | 1.91E-02 |
| TEF       | -1.9 | 3.52E-03 |
| SLC25A29  | -1.9 | 1.01E-02 |
| GIMAP8    | -1.9 | 1.74E-03 |
| CD302     | -1.9 | 9.28E-03 |
| AKR1E2    | -1.9 | 3.20E-03 |
| C7        | -1.9 | 3.94E-02 |
| ABCC4L5   | -1.8 | 2.09E-02 |
| SLC31A2   | -1.8 | 2.06E-02 |
| USH1C     | -1.8 | 4.24E-04 |
| CTSZ      | -1.8 | 4.19E-03 |
| SYNPO     | -1.8 | 7.65E-03 |
| MMP24     | -1.8 | 2.06E-02 |
| PSMB9     | -1.8 | 9.65E-03 |
| FGFRL1    | -1.8 | 8.75E-03 |
| MAP2K6    | -1.8 | 3.77E-02 |
| SLC45A4   | -1.8 | 1.06E-03 |
| GRINA     | -1.8 | 1.50E-03 |
| SLC43A2   | -1.8 | 2.00E-03 |
| RGL1      | -1.8 | 1.84E-03 |
| DAPK1     | -1.8 | 2.09E-02 |
| MEIS2     | -1.8 | 4.81E-02 |
| CD300LF   | -1.8 | 5.14E-02 |
| MTCP1     | -1.8 | 4.83E-02 |
| RNF213    | -1.8 | 4.61E-02 |
| ZNF709L5* | -1.8 | 4.65E-02 |
| UCP2      | -1.8 | 7.55E-03 |
| SNX4      | -1.8 | 7.26E-04 |
| DTX3L     | -1.8 | 7.69E-03 |
| PHACTR1   | -1.8 | 6.57E-03 |
| HSD17B1   | -1.8 | 4.04E-02 |
| CLCN2     | -1.8 | 4.79E-05 |
| CCR5      | -1.8 | 5.37E-03 |
| CYP27A1   | -1.8 | 3.99E-02 |
| PAX8      | -1.8 | 3.67E-02 |
| MOCS1     | -1.8 | 6.89E-03 |
| CADM1     | -1.8 | 3.02E-02 |
| TRPV3     | -1.8 | 1.05E-02 |
| ADA       | -1.8 | 1.88E-02 |
| RALGDS    | -1.8 | 2.82E-03 |
| TNFAIP2   | -1.8 | 2.30E-04 |
| TESK2     | -1.8 | 5.66E-03 |
| ASAP3     | -1.8 | 3.44E-03 |

|           |      |          |
|-----------|------|----------|
| SULT1B1   | -1.8 | 1.20E-03 |
| PSMB10    | -1.8 | 3.20E-03 |
| SOWAHA    | -1.8 | 2.63E-03 |
| SLC25A10  | -1.8 | 2.22E-04 |
| MMP25     | -1.8 | 1.15E-02 |
| IRF9      | -1.8 | 5.24E-03 |
| CD72      | -1.8 | 4.52E-02 |
| EGFLAM    | -1.8 | 2.10E-02 |
| VAMP2     | -1.8 | 1.77E-03 |
| GABBR1    | -1.8 | 2.17E-03 |
| FLT3LG    | -1.8 | 3.71E-03 |
| ADCY9     | -1.8 | 1.41E-04 |
| MTHFR     | -1.8 | 7.98E-03 |
| GPR34     | -1.8 | 2.92E-02 |
| GSTP1     | -1.8 | 7.59E-03 |
| TCF21     | -1.8 | 4.67E-03 |
| SLC7A3L2  | -1.8 | 4.24E-04 |
| SCIN      | -1.8 | 3.67E-02 |
| GABARAPL1 | -1.8 | 6.54E-04 |
| ADCY5     | -1.8 | 4.38E-02 |
| ACY1      | -1.7 | 9.49E-03 |
| PRAG1     | -1.7 | 1.02E-02 |
| ALDH6A1   | -1.7 | 1.15E-02 |
| DOCK6     | -1.7 | 4.13E-03 |
| MT-ATP6   | -1.7 | 1.36E-02 |
| TSKU      | -1.7 | 3.98E-02 |
| HADHA     | -1.7 | 1.84E-04 |
| ENO2      | -1.7 | 3.86E-02 |
| NPL       | -1.7 | 2.11E-02 |
| HSDL2     | -1.7 | 7.04E-04 |
| JAML      | -1.7 | 2.72E-02 |
| PLTP      | -1.7 | 1.75E-02 |
| MISP      | -1.7 | 2.06E-03 |
| UGT1A10   | -1.7 | 6.00E-04 |
| SLC7A3L8  | -1.7 | 1.79E-02 |
| MOV10     | -1.7 | 1.22E-03 |
| MERTK     | -1.7 | 7.59E-03 |
| N4BP2L1   | -1.7 | 5.30E-02 |
| AXIN2     | -1.7 | 3.42E-02 |
| TICAM1    | -1.7 | 1.41E-03 |
| CSF1R     | -1.7 | 3.70E-03 |
| CD68L1    | -1.7 | 1.16E-02 |
| MT-CO1    | -1.7 | 7.42E-03 |
| SLC27A1   | -1.7 | 3.17E-02 |
| PLA2G6    | -1.7 | 9.77E-03 |
| LCP2      | -1.7 | 7.46E-03 |
| CCL21     | -1.7 | 4.86E-02 |
| VDR       | -1.7 | 7.90E-03 |
| ACADS     | -1.7 | 2.96E-03 |
| APOE      | -1.7 | 3.18E-02 |
| LIPE      | -1.7 | 3.48E-02 |
| PARP3     | -1.7 | 3.15E-02 |
| ZNF362    | -1.7 | 7.88E-03 |
| MICALCL   | -1.7 | 2.78E-02 |
| DTX3      | -1.7 | 4.85E-03 |
| RFTN2     | -1.7 | 1.70E-02 |
| CRIP1     | -1.7 | 2.87E-02 |
| TSPAN4    | -1.7 | 3.42E-02 |
| NREP      | -1.7 | 4.99E-02 |
| NADSYN1   | -1.7 | 7.62E-03 |
| HPSE      | -1.6 | 1.75E-02 |
| LRIG2     | -1.6 | 5.77E-03 |
| DISP1     | -1.6 | 4.68E-03 |
| ATG2A     | -1.6 | 4.13E-03 |
| SPPL2B    | -1.6 | 7.40E-04 |
| ETHE1     | -1.6 | 1.38E-03 |
| ERAP2     | -1.6 | 4.60E-02 |
| DECR1     | -1.6 | 1.78E-03 |
| PSMB8     | -1.6 | 2.91E-02 |
| PLA2G4B   | -1.6 | 3.68E-02 |
| ACADSB    | -1.6 | 1.66E-03 |
| UGDH      | -1.6 | 2.77E-03 |
| HOXA11    | -1.6 | 5.12E-02 |
| TAP2      | -1.6 | 1.31E-02 |

|          |      |          |
|----------|------|----------|
| HGSNAT   | -1.6 | 1.40E-02 |
| ZNF358   | -1.6 | 1.34E-02 |
| COL4A6   | -1.6 | 3.19E-02 |
| PPARD    | -1.6 | 4.85E-03 |
| NAAA     | -1.6 | 3.53E-02 |
| LAPTM5   | -1.6 | 3.96E-02 |
| PNPLA7   | -1.6 | 4.92E-03 |
| NATD1    | -1.6 | 4.27E-02 |
| SLC44A4  | -1.6 | 3.27E-03 |
| GIMAP5   | -1.6 | 4.42E-02 |
| ACAD10   | -1.6 | 1.02E-02 |
| THRA     | -1.6 | 2.58E-02 |
| HS1BP3   | -1.6 | 1.12E-02 |
| ANKRD13A | -1.6 | 3.64E-03 |
| HDAC10   | -1.6 | 1.78E-03 |
| IRF8     | -1.6 | 1.94E-02 |
| NR3C2    | -1.6 | 2.11E-02 |
| CDX2     | -1.6 | 1.15E-02 |
| TYROBP   | -1.6 | 3.74E-02 |
| PSME1    | -1.6 | 5.26E-03 |
| BCAS3    | -1.6 | 2.27E-02 |
| INPP5K   | -1.6 | 7.22E-03 |
| GMPR     | -1.6 | 6.59E-03 |
| LTBP3    | -1.6 | 4.59E-02 |
| CYB5RL   | -1.6 | 5.37E-02 |
| ATG4A    | -1.6 | 1.45E-02 |
| KLC4     | -1.6 | 4.83E-03 |
| CD44     | -1.6 | 2.09E-02 |
| ERBB3    | -1.6 | 4.43E-02 |
| IVD      | -1.6 | 2.32E-02 |
| DHRS11   | -1.6 | 4.77E-03 |
| CYBB     | -1.6 | 3.34E-02 |
| RARRES2  | -1.6 | 4.83E-02 |
| PDXK     | -1.6 | 9.56E-03 |
| SLC6A6   | -1.6 | 5.12E-02 |
| SCARB2   | -1.6 | 1.71E-03 |
| HOXA5    | -1.6 | 1.74E-02 |
| FBP2     | -1.6 | 1.05E-02 |
| CERS6    | -1.6 | 3.04E-02 |
| SLA-8    | -1.6 | 1.98E-02 |
| LRP4     | -1.6 | 2.19E-02 |
| GALNS    | -1.6 | 1.45E-02 |
| PNPLA6   | -1.6 | 2.08E-02 |
| ASCC2    | -1.6 | 6.52E-04 |
| FTL      | -1.6 | 4.64E-02 |
| MYH14    | -1.6 | 1.75E-02 |
| MNT      | -1.6 | 1.51E-02 |
| ACAD11   | -1.6 | 1.82E-02 |
| NOP53    | -1.6 | 9.95E-03 |
| VAR52    | -1.5 | 1.93E-02 |
| MT-CO2   | -1.5 | 5.08E-02 |
| THSD4    | -1.5 | 2.95E-02 |
| MAP1LC3A | -1.5 | 1.88E-02 |
| TRAP1    | -1.5 | 1.76E-02 |
| SYNE1    | -1.5 | 4.67E-02 |
| VAV3     | -1.5 | 5.02E-02 |
| SLC9A3R1 | -1.5 | 1.36E-02 |
| FCER1G   | -1.5 | 5.31E-02 |
| CUEDC2   | -1.5 | 2.10E-02 |
| LIPA     | -1.5 | 3.68E-02 |
| TMEM94   | -1.5 | 4.35E-03 |
| MUL1     | -1.5 | 1.04E-02 |
| VSIR     | -1.5 | 1.46E-02 |
| NAT6     | -1.5 | 5.14E-02 |
| VIL1     | -1.5 | 2.16E-02 |
| PCBP4    | -1.5 | 4.08E-02 |
| CNNM4    | -1.5 | 1.45E-02 |
| TRIM66   | -1.5 | 2.93E-02 |
| TOM1L2   | -1.5 | 3.51E-02 |
| BBS4     | -1.5 | 1.94E-02 |
| CSF1     | -1.5 | 3.58E-02 |
| NT5C3A   | -1.5 | 4.41E-02 |
| ACVR1B   | -1.5 | 1.73E-02 |
| DIRC2    | -1.5 | 4.91E-02 |

|          |      |          |
|----------|------|----------|
| SCARF1   | -1.5 | 4.78E-02 |
| UVRAG    | -1.5 | 1.97E-02 |
| CTDSP2   | -1.5 | 2.09E-02 |
| IL17RA   | -1.5 | 1.36E-02 |
| SLC25A6  | -1.5 | 2.26E-02 |
| UNC93B1  | -1.5 | 4.49E-02 |
| BCL9L    | -1.5 | 4.61E-02 |
| NAV1     | -1.5 | 3.87E-02 |
| CLEC2D   | -1.5 | 5.17E-02 |
| DENND6B  | -1.5 | 5.10E-02 |
| PCGF2    | -1.5 | 4.54E-02 |
| SESN1    | -1.5 | 2.85E-02 |
| SLC25A5  | -1.5 | 2.24E-02 |
| BFAR     | -1.5 | 1.98E-02 |
| PSEN1    | -1.5 | 1.41E-02 |
| BCL2L14  | -1.5 | 2.85E-02 |
| TCN2     | -1.5 | 3.88E-02 |
| CAT      | -1.5 | 1.33E-02 |
| FCGRT    | -1.5 | 2.30E-02 |
| SLC13A1  | -1.5 | 4.47E-02 |
| SLC12A7  | -1.5 | 2.28E-02 |
| PPARA    | -1.5 | 4.14E-02 |
| MAFB     | -1.5 | 3.08E-02 |
| SP110    | -1.5 | 5.40E-02 |
| LENG8    | -1.5 | 4.23E-02 |
| ACOX1    | -1.5 | 1.80E-02 |
| ASPH     | 1.5  | 1.62E-02 |
| HM13     | 1.5  | 4.05E-02 |
| ZNF639   | 1.5  | 4.39E-02 |
| TOR1AIP1 | 1.5  | 9.73E-03 |
| MCF2L    | 1.5  | 4.37E-02 |
| SLC35B1  | 1.5  | 2.46E-02 |
| RNF115   | 1.5  | 3.78E-02 |
| VKORC1L1 | 1.5  | 1.66E-02 |
| ROCK1    | 1.5  | 3.08E-02 |
| SLC39A11 | 1.5  | 5.49E-02 |
| NUP153   | 1.5  | 2.91E-02 |
| MAPK8    | 1.5  | 3.25E-02 |
| MAP2K1   | 1.5  | 9.07E-03 |
| LRRC8A   | 1.5  | 5.45E-02 |
| UBE2N    | 1.5  | 3.17E-02 |
| EIF5     | 1.5  | 1.51E-02 |
| ACSL4    | 1.5  | 3.29E-02 |
| MTHFD1   | 1.5  | 1.94E-02 |
| FILIP1L  | 1.5  | 5.11E-02 |
| ANP32E   | 1.5  | 2.39E-02 |
| PTP4A1   | 1.5  | 4.70E-02 |
| RASA2    | 1.5  | 1.67E-02 |
| FAT1     | 1.5  | 4.34E-02 |
| SUGT1    | 1.5  | 3.17E-02 |
| UBA2     | 1.5  | 1.35E-02 |
| SLC37A3  | 1.5  | 7.96E-03 |
| TSPAN6   | 1.5  | 2.95E-02 |
| YARS     | 1.5  | 4.20E-03 |
| ITGB1    | 1.5  | 1.80E-02 |
| SMAD1    | 1.5  | 1.98E-02 |
| PSMD1    | 1.5  | 3.59E-02 |
| HMG3     | 1.5  | 2.23E-02 |
| TNPO1    | 1.5  | 3.57E-02 |
| ZW10     | 1.5  | 1.38E-02 |
| PTPN11   | 1.5  | 1.93E-02 |
| RAPGEF2  | 1.5  | 7.74E-03 |
| DDX21    | 1.5  | 2.23E-02 |
| ACKR3    | 1.5  | 4.95E-02 |
| CEP350   | 1.5  | 2.57E-02 |
| SEC16A   | 1.5  | 1.69E-02 |
| LTBP1    | 1.5  | 2.73E-02 |
| KPNB1    | 1.5  | 1.97E-02 |
| MESDC1   | 1.5  | 1.49E-02 |
| WDR36    | 1.5  | 2.03E-02 |
| P2RX4    | 1.5  | 4.22E-02 |
| MAGT1    | 1.5  | 2.43E-02 |
| PDE4B    | 1.5  | 4.82E-02 |
| DDX18    | 1.5  | 2.76E-02 |

|          |     |          |
|----------|-----|----------|
| CLTC     | 1.5 | 3.32E-02 |
| SWAP70   | 1.5 | 2.99E-02 |
| UBR1     | 1.5 | 1.69E-02 |
| ARID3A   | 1.5 | 1.18E-02 |
| NOP58    | 1.5 | 4.61E-02 |
| PBRM1    | 1.5 | 3.12E-02 |
| SRPR     | 1.5 | 1.16E-02 |
| ZNF827   | 1.5 | 3.66E-02 |
| STARD10  | 1.5 | 3.63E-02 |
| TACC3    | 1.5 | 5.11E-02 |
| MSH2     | 1.5 | 3.64E-02 |
| SLC12A4  | 1.5 | 4.15E-03 |
| SRSF10   | 1.5 | 4.44E-03 |
| MOGS     | 1.5 | 5.43E-03 |
| CSE1L    | 1.5 | 5.73E-03 |
| QSER1    | 1.5 | 3.74E-02 |
| SMC1A    | 1.5 | 3.99E-02 |
| ASCC3    | 1.5 | 5.12E-02 |
| SLC35C1  | 1.5 | 4.14E-02 |
| PPIA     | 1.5 | 1.88E-02 |
| DSC2     | 1.5 | 4.78E-02 |
| GALNT1   | 1.5 | 4.20E-02 |
| MAL2     | 1.5 | 1.07E-02 |
| RAN      | 1.5 | 1.47E-02 |
| MANSC1   | 1.5 | 2.58E-02 |
| RACGAP1  | 1.5 | 5.25E-02 |
| CAD      | 1.5 | 1.90E-02 |
| HSPA4    | 1.5 | 1.23E-02 |
| ZBTB1    | 1.5 | 3.22E-02 |
| STARD5   | 1.5 | 4.88E-02 |
| SELENOI  | 1.5 | 5.04E-03 |
| CCP110   | 1.5 | 2.09E-02 |
| TVP23B   | 1.5 | 3.30E-03 |
| TMED2    | 1.5 | 1.25E-02 |
| TRIP11   | 1.5 | 1.75E-02 |
| LAMC1    | 1.6 | 2.40E-02 |
| DDX3X    | 1.6 | 5.28E-02 |
| ACACA    | 1.6 | 4.83E-03 |
| CANX     | 1.6 | 2.07E-02 |
| SEC23B   | 1.6 | 1.24E-02 |
| BZW1     | 1.6 | 3.18E-02 |
| IDE      | 1.6 | 7.53E-03 |
| SELENOF  | 1.6 | 1.38E-02 |
| SURF4    | 1.6 | 1.38E-02 |
| APEX1    | 1.6 | 3.94E-03 |
| GOLGA4   | 1.6 | 1.42E-02 |
| PRDM1    | 1.6 | 2.16E-02 |
| TOP2B    | 1.6 | 1.38E-02 |
| NUP205   | 1.6 | 2.04E-02 |
| BTAF1    | 1.6 | 1.43E-02 |
| EIF2AK3  | 1.6 | 3.01E-03 |
| ANXA2    | 1.6 | 1.42E-02 |
| BAZ1A    | 1.6 | 7.89E-03 |
| PDPN     | 1.6 | 4.98E-02 |
| ATF4     | 1.6 | 1.20E-02 |
| AARS     | 1.6 | 6.94E-03 |
| SACS     | 1.6 | 2.04E-02 |
| SEC61A1  | 1.6 | 9.70E-03 |
| SEL1L3   | 1.6 | 2.74E-02 |
| ZNF281   | 1.6 | 3.22E-03 |
| STK39    | 1.6 | 3.52E-03 |
| FZD6     | 1.6 | 5.05E-02 |
| CLIC2    | 1.6 | 2.84E-02 |
| FUT8     | 1.6 | 5.97E-03 |
| AOAH     | 1.6 | 5.28E-02 |
| ENTPD6   | 1.6 | 1.65E-02 |
| WISP1    | 1.6 | 5.23E-02 |
| SEL1L    | 1.6 | 4.20E-03 |
| SLC39A10 | 1.6 | 5.43E-02 |
| CASP3    | 1.6 | 2.55E-03 |
| PAWR     | 1.6 | 2.76E-04 |
| SERPINB1 | 1.6 | 3.13E-02 |
| ADAMTS7  | 1.6 | 3.54E-02 |
| ERLEC1   | 1.6 | 2.58E-02 |

|          |     |          |
|----------|-----|----------|
| C9       | 1.6 | 3.93E-02 |
| ALDOC    | 1.6 | 5.08E-02 |
| PPRC1    | 1.6 | 1.77E-02 |
| MIS18BP1 | 1.6 | 3.18E-02 |
| GOLGA3   | 1.6 | 2.64E-03 |
| IQGAP1   | 1.6 | 6.60E-03 |
| ZMYND19  | 1.6 | 3.44E-02 |
| TUBA1B   | 1.6 | 6.88E-03 |
| DOCK7    | 1.6 | 1.37E-02 |
| EPRS     | 1.6 | 3.45E-03 |
| CMAS     | 1.6 | 1.54E-02 |
| SLC7A1   | 1.6 | 1.25E-02 |
| FLVCR2   | 1.6 | 2.26E-02 |
| PGM2     | 1.6 | 7.93E-03 |
| VLDLR    | 1.6 | 1.87E-03 |
| COL5A2   | 1.6 | 1.79E-02 |
| S100A6   | 1.6 | 3.06E-02 |
| AP3S1    | 1.7 | 1.36E-03 |
| PTPN12   | 1.7 | 3.05E-04 |
| CCDC134  | 1.7 | 4.17E-02 |
| FOCAD    | 1.7 | 3.14E-03 |
| ABCE1    | 1.7 | 3.69E-03 |
| NAA15    | 1.7 | 1.71E-02 |
| PRKAA2   | 1.7 | 3.44E-02 |
| CARS     | 1.7 | 1.99E-03 |
| ARG2     | 1.7 | 3.31E-02 |
| SRP54    | 1.7 | 5.23E-03 |
| SELENOK  | 1.7 | 1.33E-03 |
| EIF4E    | 1.7 | 8.21E-03 |
| PLA2G4A  | 1.7 | 3.82E-02 |
| LTBP2    | 1.7 | 2.28E-02 |
| ARCN1    | 1.7 | 2.11E-03 |
| COPB2    | 1.7 | 6.68E-03 |
| MAPK6    | 1.7 | 1.13E-02 |
| UBE2S    | 1.7 | 1.08E-02 |
| P4HA2    | 1.7 | 5.38E-03 |
| CTNNB1   | 1.7 | 3.08E-03 |
| ITGAV    | 1.7 | 7.96E-03 |
| CDCA8    | 1.7 | 2.23E-02 |
| ATM      | 1.7 | 1.39E-03 |
| AMIGO3   | 1.7 | 2.55E-03 |
| TOPBP1   | 1.7 | 3.75E-03 |
| HSPD1    | 1.7 | 1.25E-02 |
| SLC20A1  | 1.7 | 1.63E-02 |
| GMPPB    | 1.7 | 8.21E-03 |
| SOX9     | 1.7 | 1.52E-02 |
| DNAJC25  | 1.7 | 1.46E-02 |
| SLC30A7  | 1.7 | 2.93E-03 |
| AMD1     | 1.7 | 3.24E-03 |
| BRCA2    | 1.7 | 3.63E-02 |
| THY1     | 1.7 | 1.92E-02 |
| SOAT1    | 1.7 | 1.57E-02 |
| BDP1     | 1.7 | 2.88E-03 |
| UFM1     | 1.7 | 5.37E-03 |
| MAP4K4   | 1.7 | 5.24E-04 |
| ADAMTS9  | 1.7 | 4.78E-02 |
| CASC4    | 1.7 | 1.90E-03 |
| RPS6KA3  | 1.7 | 1.07E-03 |
| MAN2A1   | 1.7 | 7.59E-03 |
| SLC2A1   | 1.7 | 7.88E-03 |
| TFPI2    | 1.7 | 5.42E-03 |
| SLC7A6   | 1.7 | 2.15E-03 |
| ATR      | 1.7 | 2.92E-02 |
| RPN2     | 1.7 | 7.02E-03 |
| CFI      | 1.7 | 4.15E-02 |
| SLC39A7  | 1.7 | 1.29E-03 |
| CBX5     | 1.7 | 9.86E-04 |
| F2RL2    | 1.7 | 1.57E-02 |
| PTGER2   | 1.7 | 1.84E-03 |
| HMMR     | 1.7 | 4.64E-02 |
| COPB1    | 1.7 | 7.69E-03 |
| COL4A1   | 1.7 | 1.53E-02 |
| BUB1     | 1.7 | 5.12E-02 |
| E2F7     | 1.7 | 5.49E-02 |

|           |     |          |
|-----------|-----|----------|
| C3        | 1.7 | 3.10E-02 |
| TMED5     | 1.7 | 4.92E-04 |
| SPATS2    | 1.7 | 8.34E-04 |
| SAMSN1    | 1.7 | 1.38E-02 |
| TNFRSF11A | 1.7 | 3.61E-02 |
| GALNT6    | 1.7 | 1.20E-02 |
| DUSP5     | 1.7 | 1.26E-02 |
| SPC24     | 1.7 | 5.41E-02 |
| BTG2      | 1.7 | 9.85E-03 |
| TMED10    | 1.7 | 1.41E-04 |
| GRAP      | 1.7 | 2.12E-02 |
| TOP2A     | 1.7 | 2.46E-02 |
| NSDHL     | 1.7 | 4.11E-03 |
| COL6A3    | 1.8 | 3.31E-02 |
| CHORDC1   | 1.8 | 1.47E-02 |
| ADM       | 1.8 | 2.21E-02 |
| OSBPL8    | 1.8 | 5.05E-02 |
| SKA2      | 1.8 | 1.91E-02 |
| GARS      | 1.8 | 7.19E-04 |
| TIFA      | 1.8 | 7.65E-03 |
| STEAP2    | 1.8 | 2.56E-02 |
| ECSCR     | 1.8 | 2.28E-02 |
| SLC38A2   | 1.8 | 2.90E-02 |
| NUDCD1    | 1.8 | 6.46E-03 |
| SSR1      | 1.8 | 8.41E-04 |
| TPX2      | 1.8 | 1.13E-02 |
| MTHFD2    | 1.8 | 2.97E-03 |
| TMED7     | 1.8 | 7.76E-04 |
| SC5D      | 1.8 | 3.28E-03 |
| MMP19     | 1.8 | 4.54E-02 |
| CCT6A     | 1.8 | 4.24E-04 |
| POLE      | 1.8 | 9.67E-03 |
| CCND2     | 1.8 | 5.04E-03 |
| CHEK2     | 1.8 | 3.88E-03 |
| TNFSF15   | 1.8 | 2.54E-02 |
| MIS18A    | 1.8 | 5.06E-02 |
| SRGN      | 1.8 | 2.61E-03 |
| MCTP2     | 1.8 | 1.96E-03 |
| ERN2      | 1.8 | 1.38E-02 |
| FGR       | 1.8 | 2.10E-02 |
| PGK1      | 1.8 | 1.24E-03 |
| MARS      | 1.8 | 4.34E-05 |
| SLC16A10  | 1.8 | 3.61E-02 |
| SLC3A2    | 1.8 | 1.83E-03 |
| KLF15     | 1.8 | 3.84E-02 |
| ACOT11    | 1.8 | 5.31E-02 |
| CD24      | 1.8 | 4.34E-02 |
| FAM20C    | 1.8 | 4.61E-03 |
| KRT80     | 1.8 | 4.15E-02 |
| TNFRSF10B | 1.8 | 3.08E-03 |
| ARF2      | 1.8 | 2.80E-03 |
| SLC30A5   | 1.8 | 1.03E-03 |
| TSPAN12   | 1.8 | 3.52E-04 |
| THBD      | 1.8 | 2.09E-02 |
| INTS2     | 1.8 | 3.06E-03 |
| SEC61G    | 1.8 | 4.85E-03 |
| DNA2      | 1.8 | 2.59E-02 |
| GADD45A   | 1.8 | 2.23E-02 |
| CD69      | 1.8 | 3.37E-02 |
| ARF4      | 1.8 | 1.02E-03 |
| SERP1     | 1.8 | 4.79E-04 |
| SLC1A5    | 1.8 | 8.53E-04 |
| IGJ       | 1.8 | 2.63E-02 |
| TSPAN13   | 1.8 | 1.66E-03 |
| IFRD1     | 1.8 | 2.25E-03 |
| CCDC88B   | 1.8 | 1.78E-03 |
| SLC6A9    | 1.8 | 1.29E-02 |
| WFS1      | 1.9 | 1.20E-03 |
| KIF5B     | 1.9 | 3.90E-03 |
| GNE       | 1.9 | 2.36E-03 |
| YARS2     | 1.9 | 2.28E-02 |
| DHCR7     | 1.9 | 3.19E-04 |
| PFKFB2    | 1.9 | 3.58E-02 |
| SELENOM   | 1.9 | 2.48E-03 |

|          |     |          |
|----------|-----|----------|
| FDFT1    | 1.9 | 3.52E-04 |
| HMGCR    | 1.9 | 1.25E-03 |
| STT3A    | 1.9 | 1.19E-03 |
| SULF2    | 1.9 | 2.64E-02 |
| CALR     | 1.9 | 2.48E-03 |
| ETV5     | 1.9 | 2.26E-02 |
| CDC25C   | 1.9 | 6.70E-03 |
| HSP90AA1 | 1.9 | 2.84E-02 |
| METTL16  | 1.9 | 2.84E-02 |
| PPIB     | 1.9 | 7.19E-04 |
| PANK1    | 1.9 | 9.77E-03 |
| CXCR4    | 1.9 | 1.45E-02 |
| SLC23A1  | 1.9 | 3.44E-03 |
| HSPA8    | 1.9 | 3.54E-02 |
| ITGA1    | 1.9 | 3.71E-02 |
| BLM      | 1.9 | 1.56E-02 |
| SKIL     | 1.9 | 3.19E-05 |
| SERPINB5 | 1.9 | 8.72E-03 |
| DNAJC10  | 1.9 | 4.24E-04 |
| SPRED1   | 1.9 | 3.24E-05 |
| SLC7A2   | 1.9 | 4.15E-02 |
| CD163    | 1.9 | 4.34E-02 |
| DSE      | 1.9 | 4.61E-03 |
| EDEM3    | 1.9 | 1.53E-02 |
| LRRC59   | 1.9 | 1.99E-03 |
| ADGRG6   | 1.9 | 2.65E-03 |
| MIA3     | 1.9 | 1.23E-04 |
| PKM      | 1.9 | 3.11E-04 |
| ECM1     | 1.9 | 4.06E-03 |
| HELLS    | 1.9 | 4.19E-03 |
| GALNT7   | 1.9 | 5.18E-04 |
| MVD      | 1.9 | 2.48E-04 |
| RRM2     | 1.9 | 2.76E-04 |
| MCM6     | 1.9 | 3.68E-04 |
| FNDC3B   | 1.9 | 4.00E-03 |
| SHMT2    | 2.0 | 2.65E-05 |
| FOXA1    | 2.0 | 6.53E-03 |
| SREBF1   | 2.0 | 1.67E-04 |
| ECT2     | 2.0 | 1.69E-02 |
| SERPINH1 | 2.0 | 7.17E-03 |
| ST7      | 2.0 | 4.61E-03 |
| MMD      | 2.0 | 9.89E-04 |
| EDEM1    | 2.0 | 5.13E-05 |
| ABCA5    | 2.0 | 4.93E-03 |
| WNT5A    | 2.0 | 2.03E-02 |
| OSMR     | 2.0 | 1.41E-04 |
| XBP1     | 2.0 | 2.73E-04 |
| IL17RD   | 2.0 | 2.03E-02 |
| DDIT4    | 2.0 | 1.40E-04 |
| ATOX1    | 2.0 | 3.87E-03 |
| AACS     | 2.0 | 4.99E-05 |
| RIPK3    | 2.0 | 5.75E-04 |
| ACSL3    | 2.0 | 8.07E-05 |
| BST1     | 2.0 | 9.80E-04 |
| PLSCR4   | 2.0 | 4.20E-03 |
| ASNSD1   | 2.0 | 1.71E-03 |
| KIF23    | 2.0 | 5.38E-03 |
| IL33     | 2.0 | 9.72E-04 |
| PCK2     | 2.0 | 1.77E-03 |
| CYP51A1  | 2.1 | 1.08E-04 |
| TARS     | 2.1 | 7.29E-05 |
| SLC35A3  | 2.1 | 3.51E-03 |
| WLS      | 2.1 | 7.12E-04 |
| CEBPB    | 2.1 | 3.29E-03 |
| CFB      | 2.1 | 1.92E-02 |
| WNT9B    | 2.1 | 3.98E-02 |
| SEC24D   | 2.1 | 2.38E-06 |
| DNAJA1   | 2.1 | 4.93E-03 |
| SEC11C   | 2.1 | 2.82E-04 |
| ANKRD12  | 2.1 | 1.18E-03 |
| RRBP1    | 2.1 | 1.96E-04 |
| COL12A1  | 2.1 | 1.41E-04 |
| MEST     | 2.1 | 4.67E-02 |
| TMED3    | 2.1 | 3.45E-03 |

|           |     |          |
|-----------|-----|----------|
| AFF2      | 2.1 | 2.84E-02 |
| PGM3      | 2.1 | 7.37E-05 |
| GPR19     | 2.1 | 2.11E-02 |
| COL7A1    | 2.1 | 1.26E-03 |
| ADGRE2    | 2.1 | 2.00E-02 |
| ANXA5     | 2.1 | 1.44E-05 |
| CDH1      | 2.1 | 1.78E-04 |
| PROCR     | 2.1 | 1.02E-02 |
| SELENOS   | 2.1 | 1.21E-05 |
| FASN      | 2.1 | 1.09E-04 |
| DNAJC3    | 2.1 | 2.07E-05 |
| CD14      | 2.1 | 1.23E-02 |
| PIK3C2A   | 2.1 | 1.70E-03 |
| CTGF      | 2.1 | 2.04E-02 |
| AREG      | 2.1 | 2.09E-02 |
| IRF4      | 2.1 | 2.55E-03 |
| CSRP2     | 2.1 | 1.90E-04 |
| ZGRF1     | 2.1 | 7.88E-03 |
| TMEM38B   | 2.1 | 1.48E-03 |
| ACLY      | 2.2 | 5.17E-06 |
| SLC41A2   | 2.2 | 5.17E-02 |
| GINS1     | 2.2 | 2.93E-03 |
| STC1      | 2.2 | 1.42E-02 |
| KIAA0101  | 2.2 | 1.07E-03 |
| LSS       | 2.2 | 1.54E-05 |
| FICD      | 2.2 | 1.96E-04 |
| PANK3     | 2.2 | 4.27E-02 |
| DEPDC1    | 2.2 | 2.26E-02 |
| MYOF      | 2.2 | 3.03E-05 |
| CD79A     | 2.2 | 1.05E-02 |
| SLC5A1    | 2.2 | 2.73E-04 |
| LIPH      | 2.2 | 2.78E-04 |
| FDPS      | 2.2 | 8.28E-05 |
| TNFRSF26  | 2.2 | 5.68E-04 |
| GFPT1     | 2.2 | 1.21E-05 |
| SLC17A9   | 2.2 | 1.07E-05 |
| DERL3     | 2.2 | 2.74E-04 |
| DIAPH3    | 2.2 | 2.40E-02 |
| SH2D1B    | 2.2 | 5.04E-02 |
| CDR2      | 2.2 | 1.11E-04 |
| LOXL4     | 2.2 | 3.47E-02 |
| ADM5      | 2.2 | 5.60E-03 |
| ITGA8     | 2.2 | 1.15E-04 |
| OLFM4     | 2.2 | 1.48E-02 |
| TGM2      | 2.2 | 3.66E-05 |
| SPDL1     | 2.3 | 2.87E-02 |
| KNL1      | 2.3 | 4.26E-03 |
| FCGBP     | 2.3 | 2.08E-02 |
| IL18      | 2.3 | 7.08E-03 |
| PHLDA1    | 2.3 | 3.66E-04 |
| TNFAIP6   | 2.3 | 2.84E-02 |
| VSTM1     | 2.3 | 1.95E-02 |
| PTGER1    | 2.3 | 1.21E-02 |
| PTGS1     | 2.3 | 9.54E-06 |
| GPBR1     | 2.3 | 1.39E-02 |
| FFAR4     | 2.3 | 1.81E-02 |
| MKX       | 2.3 | 2.40E-02 |
| HYOU1     | 2.3 | 4.56E-05 |
| HSD11B1   | 2.3 | 7.62E-03 |
| PDIA4     | 2.3 | 1.15E-04 |
| CCL28     | 2.3 | 4.92E-03 |
| CHIA      | 2.3 | 3.56E-02 |
| BCAT1     | 2.4 | 4.81E-04 |
| PTPRN2    | 2.4 | 2.45E-02 |
| ADAM32    | 2.4 | 1.08E-02 |
| DEPDC7    | 2.4 | 4.79E-02 |
| SFRP1     | 2.4 | 2.73E-04 |
| SMOC2     | 2.4 | 3.44E-03 |
| SCNN1D    | 2.4 | 1.45E-02 |
| PDZK1IP1L | 2.4 | 4.24E-02 |
| GJA1      | 2.4 | 6.11E-05 |
| BMP7      | 2.4 | 6.17E-05 |
| HIF1A     | 2.4 | 9.56E-06 |
| SLC15A2   | 2.4 | 2.11E-03 |

|              |     |          |
|--------------|-----|----------|
| NFIL3        | 2.4 | 3.14E-09 |
| CDK1         | 2.4 | 1.89E-03 |
| TNFRSF6B     | 2.4 | 4.77E-03 |
| FGF2         | 2.4 | 5.70E-04 |
| TRIB3        | 2.4 | 1.05E-02 |
| CHEK1        | 2.4 | 3.35E-03 |
| AHNAK2       | 2.4 | 4.81E-02 |
| NDUFA4L2     | 2.4 | 1.77E-03 |
| FADS1        | 2.4 | 6.98E-08 |
| TIGIT        | 2.5 | 3.55E-03 |
| ATF5         | 2.5 | 2.26E-02 |
| GABRD        | 2.5 | 4.65E-02 |
| FOS          | 2.5 | 2.09E-02 |
| PRDX4        | 2.5 | 3.41E-05 |
| ATP13A3      | 2.5 | 7.31E-03 |
| IFIT1L1      | 2.5 | 3.82E-02 |
| HSPH1        | 2.5 | 1.97E-02 |
| SLC1A4       | 2.5 | 1.36E-03 |
| LMAN1        | 2.5 | 3.59E-06 |
| SHCBP1       | 2.5 | 1.06E-03 |
| AHSA2        | 2.5 | 3.80E-05 |
| MSMO1        | 2.5 | 5.94E-06 |
| SMC2         | 2.5 | 1.70E-04 |
| "MARCH3"     | 2.5 | 5.78E-04 |
| SNORA63      | 2.5 | 4.32E-02 |
| SOCS3        | 2.5 | 1.07E-03 |
| LAMB3        | 2.5 | 2.26E-06 |
| CCR2         | 2.5 | 2.63E-03 |
| EGF          | 2.5 | 1.10E-03 |
| SLC16A3      | 2.6 | 1.23E-03 |
| EBP          | 2.6 | 1.17E-05 |
| NT5DC2       | 2.6 | 1.65E-05 |
| ADAM9        | 2.6 | 1.62E-07 |
| RBPJL        | 2.6 | 1.02E-02 |
| ROS1         | 2.6 | 3.77E-02 |
| ITGA2        | 2.6 | 3.66E-05 |
| ADAMTS4      | 2.6 | 4.92E-03 |
| IGFBP4       | 2.6 | 2.53E-05 |
| KRT18        | 2.6 | 4.34E-05 |
| LOC102161685 | 2.7 | 3.95E-04 |
| MYBL1        | 2.7 | 2.28E-02 |
| BDNF         | 2.7 | 1.64E-02 |
| HSD17B7      | 2.7 | 9.57E-06 |
| PPP2R5E      | 2.7 | 2.55E-02 |
| HSP90B1      | 2.7 | 1.17E-05 |
| ELOVL6       | 2.7 | 1.65E-05 |
| SNCA         | 2.7 | 1.40E-02 |
| SLC7A5       | 2.7 | 7.21E-06 |
| ABAT         | 2.7 | 2.61E-02 |
| CSF3R        | 2.7 | 1.81E-02 |
| TFF3         | 2.7 | 2.49E-03 |
| MANF         | 2.7 | 6.81E-06 |
| CXCR1        | 2.7 | 1.71E-02 |
| IGLL5L       | 2.7 | 7.30E-03 |
| SERPINB8     | 2.7 | 2.47E-05 |
| GCNT3        | 2.7 | 1.21E-03 |
| PNP          | 2.8 | 6.81E-06 |
| FADS2        | 2.8 | 2.38E-06 |
| PHLDA2       | 2.8 | 4.07E-04 |
| TFRC         | 2.8 | 3.47E-05 |
| SPHK1        | 2.8 | 3.05E-03 |
| STARD4       | 2.8 | 1.65E-06 |
| GPAT3        | 2.8 | 1.40E-04 |
| CXCR2        | 2.8 | 2.64E-02 |
| LDLR         | 2.8 | 1.77E-06 |
| UGGT1        | 2.9 | 5.68E-03 |
| TNC          | 2.9 | 8.70E-04 |
| SQLE         | 2.9 | 7.52E-07 |
| CXCL1        | 2.9 | 1.56E-02 |
| ETV4         | 2.9 | 3.43E-04 |
| ADAM20L2     | 2.9 | 2.39E-05 |
| IL1RAP       | 2.9 | 2.14E-03 |
| SNORA20E     | 2.9 | 4.65E-02 |
| LCN2         | 3.0 | 1.80E-02 |

|           |     |          |
|-----------|-----|----------|
| BAALC     | 3.0 | 5.32E-04 |
| SEMA7A    | 3.0 | 1.23E-05 |
| MIR9829   | 3.0 | 5.30E-02 |
| SLC1A2    | 3.0 | 2.04E-03 |
| TLE6      | 3.0 | 6.63E-03 |
| FFAR2     | 3.0 | 5.18E-04 |
| SHISA8    | 3.0 | 2.45E-02 |
| HSPA5     | 3.0 | 1.21E-05 |
| B3GNT6    | 3.0 | 2.31E-03 |
| SLCO4A1   | 3.1 | 7.29E-05 |
| SERPINE2  | 3.1 | 1.06E-04 |
| DHRS9     | 3.1 | 4.24E-04 |
| IDI1      | 3.1 | 3.39E-06 |
| INSIG1    | 3.1 | 6.97E-07 |
| C4BPB     | 3.1 | 5.70E-06 |
| FGF7      | 3.2 | 4.44E-05 |
| CLCA1     | 3.2 | 1.07E-03 |
| PFKFB3    | 3.2 | 4.64E-06 |
| IL13RA2   | 3.3 | 5.25E-02 |
| POU2AF1   | 3.3 | 9.54E-06 |
| CTSG      | 3.3 | 1.58E-02 |
| NKX2-2    | 3.3 | 5.22E-03 |
| CBS       | 3.4 | 1.61E-03 |
| SLC2A3    | 3.4 | 1.42E-12 |
| CXCL8     | 3.4 | 5.32E-04 |
| MMP3      | 3.5 | 3.34E-02 |
| ACAT2     | 3.5 | 1.27E-10 |
| SLC12A8   | 3.5 | 7.40E-04 |
| CXCL14    | 3.5 | 9.85E-08 |
| SPHKAP    | 3.5 | 8.66E-04 |
| TIAM1     | 3.5 | 2.62E-05 |
| RAET1EL3  | 3.6 | 4.51E-03 |
| SYNE4     | 3.6 | 2.31E-02 |
| PLA2G3    | 3.6 | 7.51E-05 |
| ITLN2L*   | 3.6 | 2.78E-02 |
| CLEC10A   | 3.6 | 2.24E-02 |
| HHIPL1    | 3.6 | 1.65E-05 |
| IL1A      | 3.6 | 1.30E-03 |
| CMAH      | 3.7 | 4.42E-02 |
| MYOM3     | 3.7 | 1.26E-03 |
| GPRC5D    | 3.7 | 4.11E-02 |
| KLRG2     | 3.7 | 4.54E-02 |
| MED12L    | 3.8 | 5.39E-05 |
| TGM1      | 3.8 | 3.08E-02 |
| ARNTL2    | 3.8 | 6.51E-06 |
| HMGCS1    | 3.9 | 7.11E-09 |
| SCD       | 3.9 | 9.81E-07 |
| SHANK2    | 3.9 | 1.44E-03 |
| MS4A7     | 3.9 | 2.55E-03 |
| WNT2      | 3.9 | 6.32E-03 |
| LIPG      | 4.0 | 1.77E-03 |
| STEAP4    | 4.0 | 5.38E-03 |
| BDKRB1    | 4.0 | 1.65E-03 |
| COL8A1    | 4.1 | 1.19E-06 |
| HEPHL1    | 4.1 | 5.31E-02 |
| ABCA12    | 4.1 | 1.91E-03 |
| IL26      | 4.1 | 2.96E-03 |
| SFTPD     | 4.1 | 2.73E-02 |
| ADAM12    | 4.2 | 4.78E-04 |
| TAT       | 4.2 | 4.00E-02 |
| CA4       | 4.3 | 9.18E-05 |
| TIMP1     | 4.3 | 2.48E-09 |
| NRG1      | 4.3 | 8.21E-05 |
| LRP2      | 4.3 | 1.38E-02 |
| C4BPA     | 4.3 | 1.37E-03 |
| P4HA3     | 4.4 | 3.89E-04 |
| SPDEF     | 4.4 | 3.89E-06 |
| OSM       | 4.4 | 1.92E-04 |
| F13A1     | 4.4 | 1.41E-09 |
| WAP1      | 4.4 | 5.33E-03 |
| KIAA1199  | 4.6 | 4.92E-03 |
| IGFBP2    | 4.6 | 3.68E-07 |
| PLAUR     | 4.6 | 3.65E-06 |
| TNFRSF11B | 4.6 | 1.51E-04 |

|           |      |          |
|-----------|------|----------|
| RN7SL1    | 4.6  | 2.45E-02 |
| ANKRD26L3 | 4.6  | 3.02E-02 |
| CAPNS2    | 4.7  | 3.43E-04 |
| COL28A1   | 4.7  | 5.24E-04 |
| SERPINA1  | 4.7  | 5.81E-03 |
| PI3       | 4.7  | 1.63E-02 |
| SLC4A11   | 4.8  | 5.93E-03 |
| RNF39     | 4.8  | 2.65E-05 |
| IGHE      | 5.0  | 2.59E-06 |
| TNFRSF12A | 5.0  | 6.86E-10 |
| CENPE     | 5.0  | 4.28E-03 |
| PHGDH     | 5.1  | 3.92E-05 |
| CCL23     | 5.1  | 1.56E-04 |
| NPPC      | 5.1  | 3.89E-03 |
| MUC2      | 5.2  | 7.10E-08 |
| CXCL6     | 5.3  | 2.39E-05 |
| AQP9      | 5.3  | 1.56E-02 |
| ITGB6     | 5.4  | 8.74E-11 |
| IL1B      | 5.5  | 1.20E-03 |
| GZMB      | 5.5  | 2.79E-04 |
| SDS       | 5.6  | 1.53E-02 |
| NXPH4     | 5.6  | 3.16E-05 |
| NEUROG3   | 5.7  | 1.61E-03 |
| IGH@      | 5.7  | 2.70E-05 |
| MPTX      | 5.8  | 4.12E-06 |
| CHI3L2    | 6.0  | 7.37E-04 |
| ADAM20L6  | 6.1  | 2.85E-02 |
| TREM1     | 6.4  | 4.61E-03 |
| SLC6A13   | 6.5  | 1.54E-02 |
| AGR2      | 6.5  | 1.79E-05 |
| IL6       | 6.5  | 1.29E-04 |
| PTGS2     | 6.5  | 8.39E-06 |
| DIO2      | 6.5  | 3.02E-04 |
| SPINK4    | 6.6  | 2.11E-06 |
| ADAMTS16  | 6.6  | 2.55E-03 |
| BPIFB2    | 6.7  | 2.43E-03 |
| AKR1C1    | 7.0  | 5.11E-02 |
| C1QL2     | 7.0  | 4.51E-02 |
| CRLF1     | 7.1  | 3.16E-05 |
| PSAT1     | 7.2  | 3.12E-04 |
| TNIP3     | 7.3  | 4.56E-05 |
| MCPT3*    | 7.3  | 2.80E-02 |
| COL26A1   | 7.3  | 2.71E-04 |
| HOXD1     | 7.4  | 6.83E-03 |
| S100A2    | 7.4  | 9.54E-06 |
| MMP20     | 7.4  | 4.14E-02 |
| ADM2      | 7.9  | 1.29E-05 |
| S100A3    | 8.0  | 6.29E-03 |
| RHCG      | 8.0  | 4.93E-02 |
| FAM71E2   | 8.2  | 9.06E-03 |
| F3        | 8.2  | 7.74E-11 |
| HK2       | 8.6  | 2.40E-06 |
| SCGB3A1   | 8.8  | 1.90E-02 |
| MMP9      | 8.9  | 1.02E-08 |
| MMP1      | 9.4  | 4.44E-05 |
| SERPINB2  | 9.8  | 2.12E-04 |
| SNORA20   | 9.8  | 2.20E-03 |
| SLC7A11   | 9.9  | 9.13E-04 |
| KLRJ1     | 10.0 | 5.18E-04 |
| RETNLB    | 10.1 | 2.14E-03 |
| IL1R2     | 10.3 | 2.46E-06 |
| SNORA73AL | 10.5 | 2.14E-02 |
| PRG4      | 10.7 | 1.39E-02 |
| UPK1B     | 10.9 | 1.66E-08 |
| PADI4     | 11.0 | 7.93E-03 |
| BPIFB6    | 11.0 | 4.32E-02 |
| SERPINB11 | 11.3 | 9.04E-04 |
| PCSK9     | 11.5 | 5.33E-09 |
| SLC5A8    | 11.9 | 4.56E-05 |
| CYP7A1    | 12.7 | 4.64E-02 |
| LYZ       | 13.0 | 7.77E-03 |
| HCAR2     | 13.3 | 7.26E-04 |
| SULT2A1   | 13.4 | 4.28E-02 |
| CLEC4D    | 13.4 | 4.10E-02 |

|            |       |          |
|------------|-------|----------|
| CHI3L1     | 13.9  | 2.38E-06 |
| REG4       | 15.8  | 2.97E-08 |
| MAGEA13P   | 15.8  | 1.76E-02 |
| MCHR1      | 17.9  | 7.59E-03 |
| SERPINB7   | 19.3  | 1.85E-02 |
| IL11       | 19.4  | 3.58E-04 |
| MMP13      | 20.2  | 1.77E-06 |
| ANXA8      | 21.8  | 2.21E-07 |
| IL36A      | 22.7  | 3.90E-04 |
| XDH        | 22.8  | 3.03E-02 |
| CHIT1      | 24.2  | 1.65E-02 |
| TFF2       | 25.1  | 3.57E-02 |
| MMP8       | 27.1  | 7.94E-03 |
| CLDN9      | 27.7  | 5.43E-02 |
| IGHG1      | 29.1  | 1.93E-04 |
| CLEC18A    | 29.5  | 7.94E-03 |
| MMP7       | 33.4  | 3.22E-03 |
| AQP5       | 33.5  | 4.54E-04 |
| S100A8     | 38.3  | 5.18E-04 |
| S100A12    | 38.4  | 4.48E-04 |
| SDSL       | 39.6  | 1.38E-02 |
| A3GALT2    | 40.6  | 5.54E-03 |
| NTRK1      | 42.0  | 2.62E-07 |
| S100A9     | 44.8  | 2.59E-04 |
| SPINK6     | 46.2  | 5.38E-03 |
| LTF        | 52.9  | 5.95E-03 |
| TCN1       | 54.1  | 1.15E-04 |
| PADI3      | 55.7  | 1.75E-02 |
| SERPINA3-2 | 60.8  | 2.96E-06 |
| TNN        | 61.3  | 4.18E-05 |
| AVPR1B     | 62.6  | 5.42E-03 |
| GNLY       | 68.8  | 2.42E-09 |
| MMP12      | 101.0 | 2.26E-14 |
| SCGB2A2    | 105.1 | 3.14E-07 |
| ARG1       | 122.6 | 4.56E-05 |
| IL4I1L     | 161.2 | 3.98E-05 |
| REG3A      | 275.6 | 2.48E-03 |
| PADI1      | 296.4 | 3.51E-03 |
| TFF1       | 705.1 | 2.48E-05 |

Supplemental Table S6. Comparison of DEGs expressed at 52 days after inoculation in pigs infected with *Trichuris suis* with no worms (worm-free) versus those with worm.

| Feature ID | Fold change | EDGE test: FDR p-value correction |
|------------|-------------|-----------------------------------|
| SLC10A2    | -297.1      | 1.18E-04                          |
| ALPI       | -32.9       | 4.94E-06                          |
| ALDOB      | -21.0       | 1.66E-06                          |
| BTNL2      | -19.6       | 1.37E-02                          |
| AQP8       | -15.1       | 2.08E-03                          |
| NXPE2      | -13.8       | 2.92E-05                          |
| THAP12     | -13.4       | 2.27E-02                          |
| CLCA4      | -13.2       | 2.57E-05                          |
| HMGCS2     | -12.8       | 0.00E+00                          |
| OASL       | -12.1       | 1.20E-02                          |
| SLC26A3    | -12.0       | 9.52E-08                          |
| FRMD1      | -9.6        | 1.51E-03                          |
| FOXO6      | -9.1        | 1.78E-04                          |
| NR1H4      | -7.6        | 1.96E-06                          |
| GSTA2      | -7.4        | 7.07E-03                          |
| CYP2B22    | -6.8        | 5.35E-03                          |
| SLC30A10   | -6.3        | 2.38E-02                          |
| SI         | -6.1        | 2.79E-02                          |
| COL6A6     | -5.7        | 3.03E-06                          |
| CXCL9      | -5.7        | 3.65E-03                          |
| DACT2      | -5.4        | 1.74E-02                          |
| PCK1       | -5.4        | 1.48E-03                          |
| PADI2      | -5.2        | 1.54E-06                          |
| HAS3       | -5.2        | 5.01E-04                          |
| SULT1E1    | -5.2        | 7.10E-07                          |
| GUCA2A     | -5.1        | 1.44E-04                          |
| MOGAT2     | -4.9        | 2.97E-02                          |
| NCR2       | -4.8        | 1.35E-02                          |
| SLC51A     | -4.8        | 3.48E-06                          |
| SSTR5      | -4.8        | 1.30E-02                          |
| CYP26B1    | -4.6        | 4.16E-08                          |
| ABCA6      | -4.4        | 1.88E-04                          |
| SLC16A1    | -4.4        | 0.00E+00                          |
| CXCL10     | -4.4        | 7.18E-03                          |
| RSAD2      | -4.3        | 2.28E-02                          |
| AGT        | -4.3        | 4.12E-03                          |
| SLC25A34   | -4.2        | 1.12E-05                          |
| GABRB2     | -4.0        | 1.45E-04                          |
| TM6SF2     | -4.0        | 1.95E-09                          |
| IFI27      | -3.9        | 1.12E-02                          |
| CA1        | -3.9        | 1.38E-08                          |
| P2RX3      | -3.9        | 4.22E-03                          |
| ABCG2      | -3.4        | 2.49E-03                          |
| WNT8B      | -3.1        | 1.99E-03                          |
| CA12       | -3.1        | 2.51E-06                          |
| SLC38A4    | -3.0        | 3.10E-03                          |
| SELENBP1   | -3.0        | 1.73E-07                          |
| PARP15     | -3.0        | 6.17E-03                          |
| CHP2       | -2.9        | 5.14E-05                          |
| CNTFR      | -2.9        | 3.11E-03                          |
| CTBS       | -2.9        | 4.10E-02                          |
| CLDN10     | -2.8        | 4.58E-02                          |
| CXCL12     | -2.8        | 2.48E-04                          |
| SCN2A      | -2.7        | 4.98E-02                          |
| ABCA9      | -2.7        | 5.24E-02                          |
| PRSS12     | -2.7        | 9.44E-04                          |
| XCL1       | -2.7        | 5.72E-03                          |
| ABCA8      | -2.7        | 4.77E-02                          |
| GRIK4      | -2.7        | 9.60E-03                          |
| IFI44      | -2.7        | 2.55E-02                          |
| DHX58      | -2.7        | 3.59E-02                          |
| IRF4L      | -2.7        | 3.39E-02                          |
| CCL8       | -2.6        | 7.80E-03                          |
| LYPD6      | -2.6        | 3.08E-02                          |
| AHRR       | -2.6        | 6.47E-04                          |
| HOXD10     | -2.6        | 1.40E-03                          |
| UGT2C1     | -2.5        | 1.18E-05                          |
| FBXO32     | -2.5        | 2.94E-04                          |
| HS3ST3A1   | -2.5        | 4.16E-02                          |
| UBE2L6     | -2.5        | 1.39E-04                          |
| ZBP1       | -2.5        | 1.11E-02                          |
| FOXS1      | -2.5        | 5.82E-03                          |
| ABI3BP     | -2.5        | 1.33E-03                          |
| PTPRD      | -2.5        | 2.63E-04                          |
| CD36       | -2.4        | 7.42E-05                          |
| CD300C     | -2.4        | 8.64E-04                          |
| SLC24A4    | -2.4        | 1.05E-02                          |
| LILRB3L4   | -2.4        | 5.21E-02                          |

|           |      |          |
|-----------|------|----------|
| MAMDC2    | -2.4 | 6.26E-03 |
| GBP2      | -2.4 | 9.65E-03 |
| AOC1      | -2.4 | 4.46E-05 |
| FABP1     | -2.4 | 1.03E-02 |
| FCER1A    | -2.3 | 3.53E-02 |
| SELENOP   | -2.3 | 5.83E-05 |
| SLC7A3L7* | -2.3 | 4.90E-02 |
| NT5E      | -2.3 | 4.92E-03 |
| C11orf86  | -2.2 | 2.08E-03 |
| SEMA3A    | -2.2 | 1.38E-02 |
| SECTM1    | -2.2 | 4.77E-02 |
| PRDX6     | -2.2 | 5.44E-05 |
| CARD14    | -2.2 | 2.07E-03 |
| IGF2      | -2.2 | 2.80E-02 |
| TLR8      | -2.2 | 2.49E-03 |
| SLC7A8    | -2.1 | 5.64E-03 |
| GBP6      | -2.1 | 3.20E-02 |
| AHCYL2    | -2.1 | 5.97E-05 |
| CTSW      | -2.1 | 1.42E-02 |
| DBP       | -2.1 | 1.42E-02 |
| PARP14    | -2.1 | 6.98E-03 |
| SLA-DRA   | -2.1 | 5.53E-03 |
| SLC25A42  | -2.1 | 7.36E-03 |
| GLI2      | -2.1 | 7.08E-03 |
| MPEG1     | -2.1 | 5.72E-03 |
| ANK3      | -2.1 | 2.79E-02 |
| SLC7A3L4* | -2.1 | 4.13E-02 |
| EDIL3     | -2.1 | 5.28E-03 |
| CD209     | -2.1 | 3.13E-02 |
| IL34      | -2.1 | 4.12E-03 |
| RYR2      | -2.0 | 2.80E-03 |
| KLRG1     | -2.0 | 4.23E-02 |
| CYP7B1    | -2.0 | 1.59E-02 |
| TXNIP     | -2.0 | 3.65E-03 |
| ADRB1     | -2.0 | 7.57E-03 |
| CD4       | -2.0 | 1.03E-02 |
| SLA-DRB1  | -2.0 | 1.25E-02 |
| ALDH1A3   | -2.0 | 1.10E-02 |
| GBP1      | -2.0 | 4.04E-02 |
| SLA-DQA1  | -2.0 | 1.33E-02 |
| IFI44L    | -2.0 | 1.59E-02 |
| P2RY13    | -2.0 | 1.81E-02 |
| CD74      | -2.0 | 7.72E-03 |
| ACE       | -2.0 | 6.94E-03 |
| ABCB1     | -2.0 | 7.10E-03 |
| PARP9     | -1.9 | 1.04E-03 |
| PCSK6     | -1.9 | 2.26E-04 |
| ANKH      | -1.9 | 4.54E-02 |
| HOXD11    | -1.9 | 5.02E-02 |
| GGT1      | -1.9 | 4.29E-02 |
| MAF       | -1.9 | 1.80E-03 |
| EGFLAM    | -1.9 | 5.37E-03 |
| CAVIN2    | -1.9 | 9.17E-03 |
| SYNPO     | -1.9 | 3.13E-03 |
| MS4A2     | -1.9 | 2.34E-02 |
| ADAMTS8   | -1.9 | 1.07E-02 |
| COLEC12   | -1.9 | 7.57E-03 |
| LY9L1*    | -1.9 | 1.61E-02 |
| CST3      | -1.9 | 7.80E-03 |
| MAOA      | -1.9 | 7.84E-04 |
| DAPK1     | -1.9 | 1.20E-02 |
| FOXF2     | -1.9 | 5.72E-03 |
| KLHL7     | -1.9 | 2.88E-03 |
| SEMA4D    | -1.8 | 3.81E-02 |
| RNF213    | -1.8 | 3.66E-02 |
| HAPLN4    | -1.8 | 5.64E-03 |
| ACSF2     | -1.8 | 1.98E-04 |
| SATB1     | -1.8 | 2.46E-02 |
| PKNOX2    | -1.8 | 5.16E-02 |
| NR1D1     | -1.8 | 3.13E-02 |
| SLC16A5   | -1.8 | 9.64E-03 |
| CADM1     | -1.8 | 2.11E-02 |
| TEF       | -1.8 | 3.94E-03 |
| MEIS2     | -1.8 | 5.29E-02 |
| AKR1E2    | -1.8 | 4.12E-03 |
| ADGRL1    | -1.8 | 4.66E-02 |
| HIC1      | -1.8 | 1.41E-02 |
| MAP2K6    | -1.8 | 4.90E-02 |
| TMPRSS2   | -1.8 | 1.60E-02 |
| LGALS9    | -1.8 | 1.10E-02 |

|          |      |          |
|----------|------|----------|
| CLCN2    | -1.8 | 3.54E-05 |
| POUGF1   | -1.8 | 3.37E-02 |
| CD86     | -1.8 | 1.93E-02 |
| LTBP4    | -1.8 | 5.61E-03 |
| WNT2B    | -1.8 | 1.98E-02 |
| ADA      | -1.7 | 2.04E-02 |
| LIFR     | -1.7 | 7.18E-03 |
| ARHGAP6  | -1.7 | 3.47E-02 |
| IFITM1L2 | -1.7 | 8.91E-03 |
| FGFRL1   | -1.7 | 1.45E-02 |
| CIITA    | -1.7 | 4.54E-02 |
| SLA-DMB  | -1.7 | 2.70E-02 |
| IHH      | -1.7 | 7.62E-03 |
| ZBTB4    | -1.7 | 1.22E-03 |
| TAP1     | -1.7 | 2.23E-02 |
| SLC9A2   | -1.7 | 1.92E-03 |
| PTCH1    | -1.7 | 4.04E-02 |
| C1QA     | -1.7 | 1.29E-02 |
| CDKN2B   | -1.7 | 7.89E-03 |
| SLA-2    | -1.7 | 5.02E-02 |
| BDH1     | -1.7 | 7.89E-03 |
| FCGR3A   | -1.7 | 1.21E-02 |
| APOL2    | -1.7 | 3.42E-02 |
| C1QC     | -1.7 | 1.61E-02 |
| ABCA1    | -1.7 | 5.31E-02 |
| CDH24    | -1.7 | 3.29E-02 |
| IL2RB    | -1.7 | 2.69E-02 |
| JAML     | -1.7 | 3.23E-02 |
| TNFAIP2  | -1.7 | 1.04E-03 |
| ABCB6    | -1.6 | 5.08E-03 |
| CTSD     | -1.6 | 1.68E-02 |
| DOK2     | -1.6 | 3.97E-02 |
| SLC45A3  | -1.6 | 2.17E-02 |
| IGSF3    | -1.6 | 5.40E-02 |
| TMPRSS4  | -1.6 | 6.34E-03 |
| CD33     | -1.6 | 4.32E-02 |
| FGF11    | -1.6 | 2.39E-02 |
| SLA-3    | -1.6 | 4.54E-02 |
| TCF21    | -1.6 | 1.33E-02 |
| SNX4     | -1.6 | 5.72E-03 |
| PNPLA6   | -1.6 | 6.03E-03 |
| CD302    | -1.6 | 5.19E-02 |
| PFKFB4   | -1.6 | 5.72E-03 |
| RETSAT   | -1.6 | 7.89E-03 |
| LCP2     | -1.6 | 1.11E-02 |
| GIMAP8   | -1.6 | 1.73E-02 |
| NADK     | -1.6 | 4.96E-03 |
| F8       | -1.6 | 3.01E-02 |
| SCARB2   | -1.6 | 5.21E-04 |
| SLC25A27 | -1.6 | 7.18E-03 |
| ELMSAN1  | -1.6 | 3.05E-02 |
| SLA-11   | -1.6 | 4.46E-02 |
| ZNF664   | -1.6 | 5.37E-03 |
| SLC8A1   | -1.6 | 5.29E-02 |
| TP53INP2 | -1.6 | 3.64E-02 |
| RALGDS   | -1.6 | 2.21E-02 |
| COL4A6   | -1.6 | 4.50E-02 |
| SIPA1    | -1.6 | 5.29E-02 |
| CSF2RB   | -1.5 | 4.36E-02 |
| CD300H   | -1.5 | 3.24E-02 |
| GSTP1    | -1.5 | 4.90E-02 |
| PIK3IP1  | -1.5 | 4.80E-02 |
| TMEM140  | -1.5 | 3.04E-02 |
| CSF1     | -1.5 | 1.68E-02 |
| PLCD1    | -1.5 | 3.39E-02 |
| VDR      | -1.5 | 3.04E-02 |
| IL10RA   | -1.5 | 3.17E-02 |
| IRF9     | -1.5 | 4.68E-02 |
| ASAP3    | -1.5 | 4.15E-02 |
| MERTK    | -1.5 | 4.10E-02 |
| SYNE1    | -1.5 | 4.69E-02 |
| DTX3     | -1.5 | 2.14E-02 |
| BSG      | -1.5 | 2.27E-02 |
| ADCY9    | -1.5 | 5.72E-03 |
| MOV10    | -1.5 | 1.20E-02 |
| HPSE     | -1.5 | 5.25E-02 |
| UGT1A10  | -1.5 | 8.65E-03 |
| PNPLA2   | -1.5 | 3.42E-02 |
| TST      | -1.5 | 5.16E-02 |
| COBL     | -1.5 | 1.01E-02 |

|           |      |          |
|-----------|------|----------|
| TSPAN7    | -1.5 | 3.19E-02 |
| UNC93B1   | -1.5 | 4.34E-02 |
| LRP4      | -1.5 | 5.02E-02 |
| MAP3K3    | -1.5 | 1.38E-02 |
| CSF1R     | -1.5 | 4.54E-02 |
| GABARAPL1 | -1.5 | 2.90E-02 |
| PCGF2     | -1.5 | 5.29E-02 |
| SLC30A7   | 1.5  | 3.01E-02 |
| TMED2     | 1.5  | 1.87E-02 |
| HMGB1     | 1.5  | 1.59E-02 |
| ENTPD6    | 1.5  | 4.58E-02 |
| EPRS      | 1.5  | 1.81E-02 |
| SMAD1     | 1.5  | 1.17E-02 |
| MAP4K4    | 1.5  | 9.03E-03 |
| SELENOS   | 1.5  | 3.07E-02 |
| SLC39A11  | 1.5  | 3.01E-02 |
| EDEM1     | 1.5  | 2.46E-02 |
| MAPK6     | 1.5  | 4.90E-02 |
| MET       | 1.5  | 4.52E-02 |
| SLC30A5   | 1.5  | 3.16E-02 |
| NECTIN1   | 1.5  | 3.13E-02 |
| MAL2      | 1.5  | 8.79E-03 |
| CDH17     | 1.5  | 3.46E-02 |
| COPB1     | 1.5  | 4.68E-02 |
| SHMT2     | 1.5  | 1.06E-02 |
| VLDLR     | 1.5  | 7.00E-03 |
| ACTG1     | 1.5  | 2.84E-03 |
| ARF2      | 1.5  | 4.54E-02 |
| SLC39A7   | 1.5  | 1.20E-02 |
| ERLEC1    | 1.5  | 4.94E-02 |
| SLC7A1    | 1.5  | 3.05E-02 |
| SPRED1    | 1.5  | 7.34E-03 |
| SELENOF   | 1.5  | 1.19E-02 |
| S100A11   | 1.5  | 3.35E-02 |
| UFM1      | 1.5  | 2.36E-02 |
| ANXA5     | 1.5  | 1.54E-02 |
| TACC3     | 1.5  | 3.05E-02 |
| PGK1      | 1.5  | 1.73E-02 |
| HMGB2     | 1.5  | 1.72E-02 |
| CTNNB1    | 1.5  | 8.88E-03 |
| MYBL2     | 1.5  | 3.16E-02 |
| MCM6      | 1.5  | 2.31E-02 |
| STT3A     | 1.5  | 2.64E-02 |
| C9        | 1.5  | 5.09E-02 |
| CBFA2T2   | 1.5  | 2.97E-02 |
| ANXA2     | 1.5  | 9.17E-03 |
| SERP1     | 1.5  | 8.65E-03 |
| PRTFDC1   | 1.5  | 4.54E-02 |
| RACGAP1   | 1.5  | 2.85E-02 |
| AMIGO3    | 1.6  | 5.61E-03 |
| OSMR      | 1.6  | 1.24E-02 |
| RPN2      | 1.6  | 1.62E-02 |
| ODC1      | 1.6  | 4.12E-03 |
| FZD6      | 1.6  | 4.12E-02 |
| HMG2      | 1.6  | 1.45E-03 |
| SPATS2    | 1.6  | 3.11E-03 |
| UBE2S     | 1.6  | 1.44E-02 |
| PLK1      | 1.6  | 1.79E-02 |
| SKA2      | 1.6  | 5.02E-02 |
| TSPAN13   | 1.6  | 1.37E-02 |
| CHEK2     | 1.6  | 1.60E-02 |
| BNIP3     | 1.6  | 7.73E-03 |
| KCNE3     | 1.6  | 6.59E-03 |
| FICD      | 1.6  | 2.91E-02 |
| SLC35C1   | 1.6  | 7.89E-03 |
| SEC24D    | 1.6  | 1.45E-03 |
| SELENOM   | 1.6  | 1.73E-02 |
| TMEM38B   | 1.6  | 5.49E-02 |
| MIA3      | 1.6  | 4.10E-03 |
| SLC1A5    | 1.6  | 5.72E-03 |
| SERPINB1  | 1.6  | 1.75E-02 |
| P2RX4     | 1.6  | 4.88E-03 |
| BIRC5     | 1.6  | 1.82E-02 |
| GARS      | 1.6  | 1.95E-03 |
| ADGRG6    | 1.6  | 2.36E-02 |
| CASC4     | 1.6  | 2.07E-03 |
| TK1       | 1.6  | 3.23E-02 |
| CLIC2     | 1.6  | 1.22E-02 |
| LRRC59    | 1.6  | 1.88E-02 |
| RRBP1     | 1.6  | 1.17E-02 |

|            |     |          |
|------------|-----|----------|
| STARD10    | 1.6 | 4.04E-03 |
| SLC17A9    | 1.6 | 5.72E-03 |
| P4HA2      | 1.6 | 3.60E-03 |
| KIF22      | 1.6 | 9.28E-03 |
| CYP51A1    | 1.6 | 5.76E-03 |
| C3         | 1.6 | 3.66E-02 |
| CAD        | 1.6 | 1.54E-03 |
| SEL1L3     | 1.6 | 7.42E-03 |
| PCDH12     | 1.6 | 5.06E-02 |
| ARG2       | 1.6 | 2.16E-02 |
| S100A6     | 1.6 | 1.55E-02 |
| CMAS       | 1.6 | 6.03E-03 |
| CFI        | 1.6 | 4.23E-02 |
| DHCR7      | 1.6 | 1.99E-03 |
| POLE       | 1.6 | 1.60E-02 |
| FOXA1      | 1.6 | 3.80E-02 |
| MANF       | 1.6 | 3.08E-02 |
| NSDHL      | 1.6 | 4.96E-03 |
| WLS        | 1.6 | 1.61E-02 |
| CDH1       | 1.6 | 8.68E-03 |
| B4GALT1    | 1.6 | 4.04E-02 |
| C9H1orf116 | 1.6 | 7.00E-03 |
| GFPT1      | 1.7 | 3.70E-03 |
| SEC11C     | 1.7 | 8.53E-03 |
| PIIB       | 1.7 | 3.55E-03 |
| IL33       | 1.7 | 1.40E-02 |
| HSP90B1    | 1.7 | 2.68E-02 |
| DNAJC10    | 1.7 | 3.09E-03 |
| PLK2       | 1.7 | 9.11E-03 |
| SEC61G     | 1.7 | 7.96E-03 |
| PANK1      | 1.7 | 2.78E-02 |
| ACSL3      | 1.7 | 2.03E-03 |
| ARF4       | 1.7 | 1.90E-03 |
| XBP1       | 1.7 | 3.59E-03 |
| STARD5     | 1.7 | 4.28E-03 |
| TSPAN12    | 1.7 | 4.45E-04 |
| RIPK3      | 1.7 | 5.64E-03 |
| FASN       | 1.7 | 3.60E-03 |
| DNA2       | 1.7 | 3.13E-02 |
| GALNT7     | 1.7 | 2.49E-03 |
| CDC25C     | 1.7 | 1.33E-02 |
| GNA14      | 1.7 | 5.35E-03 |
| PKM        | 1.7 | 1.40E-03 |
| WFS1       | 1.7 | 1.61E-03 |
| LIPH       | 1.7 | 8.88E-03 |
| BLM        | 1.7 | 3.03E-02 |
| TPX2       | 1.7 | 6.03E-03 |
| ALDOC      | 1.7 | 1.06E-02 |
| HIF1A      | 1.7 | 3.73E-03 |
| BST1       | 1.7 | 5.72E-03 |
| MMD        | 1.7 | 4.10E-03 |
| SC5D       | 1.7 | 1.42E-03 |
| ATOH1      | 1.7 | 2.37E-02 |
| DERL3      | 1.7 | 7.70E-03 |
| PHLDA1     | 1.7 | 1.31E-02 |
| YARS2      | 1.7 | 2.77E-02 |
| DDIT4      | 1.7 | 9.24E-04 |
| SLC5A1     | 1.7 | 6.38E-03 |
| SLC35A3    | 1.7 | 1.61E-02 |
| PDIA4      | 1.7 | 7.74E-03 |
| FLVCR2     | 1.8 | 2.73E-03 |
| MANSC1     | 1.8 | 2.51E-04 |
| BUB1       | 1.8 | 2.17E-02 |
| FDPS       | 1.8 | 2.52E-03 |
| PGM3       | 1.8 | 9.17E-04 |
| HELLS      | 1.8 | 7.06E-03 |
| MVD        | 1.8 | 5.01E-04 |
| CCNB2      | 1.8 | 2.21E-02 |
| BGN        | 1.8 | 4.69E-02 |
| ATOX1      | 1.8 | 8.67E-03 |
| PNP        | 1.8 | 7.47E-03 |
| NT5DC2     | 1.8 | 5.72E-03 |
| LSS        | 1.8 | 3.41E-04 |
| AACS       | 1.8 | 1.18E-04 |
| ARNTL2     | 1.8 | 5.25E-02 |
| FADS1      | 1.8 | 8.80E-05 |
| RRM2       | 1.8 | 2.15E-04 |
| BUB1B      | 1.8 | 9.28E-03 |
| ECM1       | 1.8 | 3.23E-03 |
| TOP2A      | 1.8 | 4.25E-03 |

|          |     |          |
|----------|-----|----------|
| DGAT2    | 1.8 | 3.05E-02 |
| E2F7     | 1.8 | 1.34E-02 |
| ETV5     | 1.8 | 1.26E-02 |
| SLC50A1  | 1.8 | 9.18E-04 |
| ECSCR    | 1.8 | 3.94E-03 |
| MIS18A   | 1.9 | 1.76E-02 |
| ADAM9    | 1.9 | 2.26E-04 |
| AFF2     | 1.9 | 4.49E-02 |
| TRAIP    | 1.9 | 5.08E-03 |
| PHLDA2   | 1.9 | 2.92E-02 |
| ZGRF1    | 1.9 | 2.01E-02 |
| SMOC2    | 1.9 | 2.90E-02 |
| CDC48    | 1.9 | 9.35E-04 |
| SLC24A5  | 1.9 | 4.98E-02 |
| HMGCR    | 1.9 | 1.78E-04 |
| GADD45A  | 1.9 | 5.02E-03 |
| CFB      | 1.9 | 2.38E-02 |
| GIN51    | 1.9 | 7.55E-03 |
| KIF23    | 1.9 | 5.99E-03 |
| ACLY     | 1.9 | 1.76E-05 |
| BCAT1    | 1.9 | 5.18E-03 |
| CCR2     | 1.9 | 3.11E-02 |
| MYOF     | 1.9 | 1.39E-04 |
| CD163    | 1.9 | 2.29E-02 |
| THBD     | 1.9 | 3.32E-03 |
| COL7A1   | 1.9 | 1.47E-03 |
| BMP7     | 1.9 | 1.22E-03 |
| SMC2     | 1.9 | 4.42E-03 |
| FDFT1    | 1.9 | 1.14E-05 |
| MASTL    | 1.9 | 4.54E-02 |
| SULT1A1  | 1.9 | 1.57E-02 |
| PRDX4    | 1.9 | 1.03E-03 |
| "MARCH3" | 1.9 | 8.78E-03 |
| SLC7A5   | 1.9 | 1.40E-03 |
| CHEK1    | 1.9 | 2.00E-02 |
| CD24     | 1.9 | 6.90E-03 |
| STARD4   | 1.9 | 8.33E-04 |
| HSD17B7  | 1.9 | 1.22E-03 |
| LMAN1    | 2.0 | 1.88E-04 |
| SERPINE2 | 2.0 | 1.59E-02 |
| PKD1L2   | 2.0 | 4.19E-02 |
| SLC25A35 | 2.0 | 9.64E-03 |
| DEPDC1   | 2.0 | 3.05E-02 |
| ADM5     | 2.0 | 7.68E-03 |
| GPR19    | 2.0 | 1.76E-02 |
| GNE      | 2.0 | 5.66E-05 |
| COL8A1   | 2.0 | 1.40E-02 |
| CD14     | 2.0 | 7.89E-03 |
| CDK1     | 2.0 | 7.19E-03 |
| IGLL5L   | 2.0 | 5.49E-02 |
| SERPINB5 | 2.0 | 9.60E-04 |
| AZGP1    | 2.0 | 3.20E-02 |
| KIAA0101 | 2.0 | 7.84E-04 |
| KRT18    | 2.0 | 1.04E-03 |
| PCK2     | 2.0 | 3.22E-04 |
| ADAM20L2 | 2.0 | 2.60E-03 |
| TMED3    | 2.0 | 1.16E-03 |
| SHCBP1   | 2.0 | 5.72E-03 |
| HMMR     | 2.0 | 1.22E-03 |
| LDLR     | 2.1 | 2.26E-04 |
| DHRS9    | 2.1 | 1.73E-02 |
| SEMA7A   | 2.1 | 1.51E-03 |
| MEST     | 2.1 | 2.12E-02 |
| CXCR4    | 2.1 | 5.27E-04 |
| SPDL1    | 2.1 | 2.79E-02 |
| F13A1    | 2.1 | 1.19E-03 |
| ZNF215   | 2.1 | 2.39E-02 |
| KNL1     | 2.1 | 2.84E-03 |
| SLC1A2   | 2.1 | 2.44E-02 |
| ASGR2    | 2.1 | 3.46E-02 |
| GCNT3    | 2.1 | 7.34E-03 |
| ITGA2    | 2.2 | 1.50E-04 |
| SERPINB8 | 2.2 | 2.45E-04 |
| IGHE     | 2.2 | 1.73E-02 |
| CFHR2    | 2.2 | 4.39E-02 |
| MYBL1    | 2.2 | 4.61E-02 |
| STC1     | 2.2 | 3.42E-03 |
| HIST1H3A | 2.2 | 9.33E-03 |
| EGF      | 2.2 | 1.60E-03 |
| PFKFB3   | 2.2 | 5.86E-04 |

|              |     |          |
|--------------|-----|----------|
| MSMO1        | 2.2 | 4.56E-06 |
| GALNT6       | 2.2 | 3.33E-06 |
| IDI1         | 2.2 | 2.17E-04 |
| FABP3        | 2.3 | 1.30E-03 |
| VSTM1        | 2.3 | 7.89E-03 |
| FADS2        | 2.3 | 1.63E-05 |
| CFAP74       | 2.3 | 3.65E-03 |
| MED12L       | 2.3 | 6.53E-03 |
| SQLE         | 2.3 | 8.68E-06 |
| SPHKAP       | 2.3 | 1.77E-02 |
| HP           | 2.3 | 1.38E-02 |
| FFAR4        | 2.3 | 5.35E-03 |
| C4BPB        | 2.3 | 1.66E-04 |
| LOC102161685 | 2.3 | 4.59E-04 |
| EBP          | 2.3 | 4.62E-06 |
| LIPG         | 2.3 | 4.46E-02 |
| TMEM158      | 2.4 | 4.39E-02 |
| OSM          | 2.4 | 1.97E-02 |
| PTGER1       | 2.4 | 2.11E-03 |
| LAMB3        | 2.4 | 1.73E-07 |
| ELOVL6       | 2.4 | 1.46E-05 |
| IFIT1L1      | 2.4 | 2.12E-02 |
| SCNN1D       | 2.4 | 4.59E-03 |
| FGF7         | 2.4 | 6.47E-04 |
| IGFBP4       | 2.4 | 1.00E-05 |
| CXCL14       | 2.4 | 2.69E-05 |
| TFF3         | 2.4 | 2.78E-03 |
| POU2AF1      | 2.4 | 1.75E-04 |
| CACNA1F      | 2.4 | 4.37E-02 |
| TNFRSF12A    | 2.5 | 1.07E-04 |
| TFRC         | 2.5 | 2.06E-05 |
| PPP2R5E      | 2.5 | 1.68E-02 |
| HSD11B1      | 2.5 | 5.23E-04 |
| ROS1         | 2.5 | 2.01E-02 |
| SPHK1        | 2.5 | 2.43E-03 |
| ACAT2        | 2.5 | 4.51E-08 |
| FCN2         | 2.5 | 2.74E-03 |
| SCD          | 2.5 | 1.62E-04 |
| GPAT3        | 2.5 | 7.03E-05 |
| BAALC        | 2.6 | 9.35E-04 |
| PTPRN2       | 2.6 | 3.00E-03 |
| MMP9         | 2.6 | 6.92E-03 |
| IGH@         | 2.6 | 1.24E-02 |
| ME1          | 2.6 | 5.20E-03 |
| HHIPL1       | 2.6 | 1.78E-04 |
| ETV4         | 2.7 | 1.36E-04 |
| SNCA         | 2.7 | 4.96E-03 |
| PLA2G3       | 2.7 | 4.13E-04 |
| HMGCS1       | 2.8 | 3.97E-07 |
| ADGRE1       | 2.8 | 3.05E-02 |
| PLAUR        | 2.8 | 4.01E-04 |
| WAP1*        | 2.8 | 3.59E-02 |
| CLCA1        | 2.8 | 6.25E-04 |
| TMEM190      | 2.8 | 4.80E-02 |
| NKX2-2       | 2.8 | 5.20E-03 |
| CLEC10A      | 2.9 | 3.05E-02 |
| LCN2         | 2.9 | 6.98E-03 |
| B3GNT6       | 2.9 | 5.44E-04 |
| SLC11A1      | 2.9 | 2.78E-02 |
| TIMP1        | 2.9 | 2.65E-07 |
| INSIG1       | 2.9 | 1.64E-08 |
| ALDH3B2      | 2.9 | 1.18E-02 |
| TGM3         | 3.0 | 3.20E-02 |
| TREM2        | 3.0 | 7.72E-03 |
| MMP1         | 3.1 | 2.86E-02 |
| SLC12A8      | 3.1 | 3.65E-04 |
| ABAT         | 3.1 | 1.97E-03 |
| ADAM12       | 3.1 | 1.29E-03 |
| PDZK1IP1L    | 3.1 | 8.64E-04 |
| ITGB6        | 3.1 | 2.10E-07 |
| CCL23        | 3.1 | 2.69E-03 |
| TLE6         | 3.2 | 5.27E-04 |
| PHGDH        | 3.3 | 5.01E-04 |
| PTGS2        | 3.4 | 8.84E-04 |
| GABRD        | 3.4 | 4.54E-04 |
| CBS          | 3.5 | 7.42E-05 |
| SPDEF        | 3.5 | 2.29E-06 |
| RN7SL1       | 3.5 | 3.19E-02 |
| TNIP3        | 3.5 | 3.16E-03 |
| LRP2         | 3.6 | 1.26E-02 |

|            |      |          |
|------------|------|----------|
| SHANK2     | 3.6  | 4.23E-04 |
| SYNE4      | 3.6  | 4.65E-03 |
| SLC7A11    | 3.7  | 3.60E-02 |
| P4HA3      | 3.7  | 1.39E-04 |
| STRA6      | 3.8  | 6.03E-03 |
| MUC2       | 3.8  | 1.60E-07 |
| IL1R2      | 3.8  | 1.61E-03 |
| NEUROG3    | 3.8  | 3.07E-03 |
| TNFRSF11B  | 3.9  | 5.64E-05 |
| SERPINB2   | 3.9  | 1.24E-02 |
| NPC1L1     | 3.9  | 4.56E-02 |
| PSAT1      | 3.9  | 3.89E-03 |
| NTRK1      | 4.0  | 2.12E-02 |
| COL28A1    | 4.0  | 1.89E-04 |
| CAPNS2     | 4.1  | 7.03E-05 |
| S100A2     | 4.2  | 1.75E-04 |
| HK2        | 4.2  | 1.78E-04 |
| MYOM3      | 4.2  | 1.12E-05 |
| SAA3       | 4.5  | 3.27E-02 |
| PADI4      | 4.5  | 4.99E-02 |
| RNF39      | 4.5  | 6.41E-07 |
| SERPINA1   | 4.5  | 9.03E-04 |
| S100A3     | 4.5  | 2.35E-02 |
| AADAC      | 4.6  | 3.59E-03 |
| HOXD1      | 4.6  | 9.07E-03 |
| ADM2       | 4.7  | 7.03E-05 |
| WNT2       | 4.7  | 1.78E-04 |
| MPTX       | 4.9  | 2.10E-07 |
| UPK1B      | 5.0  | 2.36E-06 |
| BPIFB2     | 5.0  | 1.64E-03 |
| FAM71E2    | 5.0  | 3.52E-02 |
| F3         | 5.2  | 1.85E-10 |
| SNORA48    | 5.2  | 2.03E-03 |
| CHI3L1     | 5.2  | 2.51E-04 |
| PI3        | 5.3  | 1.15E-03 |
| NPPC       | 5.7  | 3.92E-04 |
| AGR2       | 5.7  | 6.15E-07 |
| COL26A1    | 5.8  | 6.82E-05 |
| SPINK4     | 5.8  | 1.64E-08 |
| BPIFB6     | 6.0  | 4.61E-02 |
| GYS2       | 6.0  | 4.66E-02 |
| MCHR1      | 6.1  | 3.59E-02 |
| SERPINB11  | 6.3  | 3.20E-03 |
| IL36A      | 6.8  | 6.44E-03 |
| SULT2A1    | 7.5  | 5.36E-02 |
| ANXA8      | 7.6  | 1.18E-05 |
| TRIM6      | 7.8  | 9.11E-03 |
| ADAM20L6   | 8.1  | 1.07E-03 |
| CRLF1      | 8.2  | 1.09E-08 |
| ADAMTS16   | 8.3  | 2.23E-05 |
| IL11       | 8.3  | 1.22E-03 |
| PCSK9      | 9.0  | 1.11E-11 |
| A3GALT2    | 9.7  | 1.38E-02 |
| REG4       | 9.9  | 1.95E-09 |
| AQP5       | 10.2 | 1.63E-03 |
| IGHG1      | 10.3 | 8.11E-04 |
| MMP7       | 10.5 | 7.62E-03 |
| S100A8     | 10.8 | 2.17E-03 |
| S100A9     | 11.0 | 2.03E-03 |
| MMP8       | 11.4 | 3.47E-03 |
| MMP13      | 11.4 | 2.65E-07 |
| TFF2       | 12.2 | 3.25E-02 |
| SLC6A2     | 13.1 | 2.14E-02 |
| S100A12    | 13.4 | 7.36E-04 |
| PRG4       | 13.5 | 3.43E-04 |
| MMP12      | 13.9 | 7.63E-10 |
| C1QL2      | 15.4 | 1.39E-04 |
| SERPINA3-2 | 16.2 | 1.05E-06 |
| ARG1       | 16.6 | 8.41E-04 |
| SCGB2A2    | 17.9 | 4.89E-06 |
| POUSF1     | 19.0 | 3.78E-02 |
| PADI3      | 19.0 | 4.69E-03 |
| RHCG       | 19.8 | 5.18E-04 |
| SPINK6     | 21.5 | 4.16E-04 |
| WNT7A      | 25.9 | 4.23E-02 |
| IL4I1L     | 26.0 | 1.39E-04 |
| CLEC18A    | 46.3 | 9.53E-05 |
| PADI1      | 51.6 | 6.25E-04 |
| TFF1       | 93.2 | 3.12E-06 |

Supplemental Table S7: Clustered Up-regulation of Physiology and Immunology DEGs

| Gene                                                       | Functional Categorization                                                            | S2 DPI w worms vs Control Fold | EDGE FDR Adj p value | S2 DPI w/o worms vs Control Fold | EDGE FDR Adj p value | (S2 DPI Inf w/o worms vs w Worms Fold | EDGE FDR Adj p value | (21 DPI Inf vs Control) Fold | EDGE FDR Adj p value |
|------------------------------------------------------------|--------------------------------------------------------------------------------------|--------------------------------|----------------------|----------------------------------|----------------------|---------------------------------------|----------------------|------------------------------|----------------------|
| <b>Antibacterial Response</b>                              |                                                                                      |                                |                      |                                  |                      |                                       |                      |                              |                      |
| BPIFB2                                                     | Bacterial Binding (12185532); BPI SF                                                 | 6.7                            | 2.43E-03             |                                  |                      | 5.0                                   | 1.64E-03             |                              |                      |
| BPIFB6                                                     | Bacterial Binding (12185532); BPI SF                                                 | 11.0                           | 4.32E-02             |                                  |                      | 6.0                                   | 4.61E-02             |                              |                      |
| GNLY                                                       | Antimicrobial Peptide (15996224); SapB 2 SF                                          | 68.8                           | 2.42E-09             | 132.0                            | 2.98E-11             |                                       |                      |                              |                      |
| HMG2                                                       | Antimicrobial Peptide (16204630); HMG14/17 SF                                        |                                |                      |                                  |                      |                                       |                      | 1.6                          | 1.45E-03             |
| LCN2                                                       | Antibacterial Response (15531878, 25398327); Lipocalin SF                            | 3.0                            | 1.80E-02             |                                  |                      | 2.9                                   | 6.98E-03             |                              |                      |
| LTF                                                        | Antibacterial Response (8423097); Transferrin SF                                     | 52.9                           | 5.95E-03             |                                  |                      |                                       |                      |                              |                      |
| LYZ                                                        | Antibacterial Response (28804131); LYZ1 SF                                           | 13.0                           | 7.77E-03             |                                  |                      |                                       |                      |                              |                      |
| NTRK1                                                      | Antibacterial Response (25359936); Allergic Inflammation (25389033); Ig SF; LRRCT SF | 42.0                           | 2.62E-07             | 10.6                             | 3.53E-03             | 4.0                                   | 2.12E-02             |                              |                      |
| OLF4                                                       | (-) Regulator of Antibacterial Responses (20534456, 22844115); OLF SF                | 2.2                            | 1.48E-02             |                                  |                      |                                       |                      |                              |                      |
| PADI4                                                      | Antibacterial Responses (20733033); PAD SF                                           | 11.0                           | 7.93E-03             |                                  |                      | 4.5                                   | 4.99E-02             |                              |                      |
| PI3                                                        | Antimicrobial Peptide Activity (17964057); WAP SF                                    | 4.7                            | 1.63E-02             |                                  |                      | 5.3                                   | 1.15E-03             | 4.6                          | 2.55E-08             |
| S100A14                                                    | Antibacterial Response (15568027); S100 SF (17625598)                                |                                |                      |                                  |                      |                                       |                      | 1.8                          | 2.70E-02             |
| SLPI                                                       | Antimicrobial Peptide Activity (18075823); WAP SF                                    |                                |                      |                                  |                      |                                       |                      | 4.8                          | 2.22E-11             |
| SPHK1                                                      | Antibacterial Response (20634980, 26113114); DAGK Cat SF                             |                                |                      |                                  |                      | 2.5                                   | 2.43E-03             | 2.8                          | 3.05E-03             |
| UPK1B                                                      | E. coli Attachment factor (9822381); Tetraspanin LEL SF                              | 10.9                           | 1.66E-08             |                                  |                      | 5.0                                   | 2.36E-06             |                              |                      |
| <b>Antiparasitic Response</b>                              |                                                                                      |                                |                      |                                  |                      |                                       |                      |                              |                      |
| AREG                                                       | Antiparasitic Response (17170297); Th2-Associated (17170297); PHA02887 SF            | 2.1                            | 2.09E-02             |                                  |                      |                                       |                      | 2.2                          | 8.37E-03             |
| ARG1                                                       | Antiparasitic Response (19764983); M2-associated (5879104); Arginase HDAC SF         | 122.6                          | 4.56E-05             |                                  |                      | 16.6                                  | 8.41E-04             | 30.1                         | 2.28E-07             |
| CHIA                                                       | Antiparasitic Response (15618176); Th2-Associated (11553626); GH18 Chitinase Like SF | 2.3                            | 3.56E-02             |                                  |                      |                                       |                      |                              |                      |
| GATA3                                                      | (+) Regulator of Th2-Cell/ILC2 Differentiation (19375293, 23733962); ZnF GATA TF SF  |                                |                      | 4.4                              | 4.43E-04             |                                       |                      |                              |                      |
| IGHE                                                       | Antiparasitic Response (24592267); Ig SF; Ig Heavy Chain Constant Region SF          | 5.0                            | 2.59E-06             | 2.3                              | 4.86E-02             | 2.2                                   | 1.73E-02             |                              |                      |
| IRF4                                                       | Antiparasitic Response (20729857); M2-associated (20729857); IRF TF SF               | 2.1                            | 2.55E-03             |                                  |                      |                                       |                      |                              |                      |
| REG3A                                                      | Antiparasitic Response (25240019); PRR (16931762)                                    | 275.6                          | 2.48E-03             | 168.9                            | 2.26E-02             |                                       |                      |                              |                      |
| REG4                                                       | Antiparasitic Response (25240019); PRR (20692269); CLECT SF                          | 15.8                           | 2.97E-08             |                                  |                      | 9.9                                   | 1.95E-09             | 11.1                         | 8.84E-20             |
| RETNLB                                                     | Antiparasitic Responses (15340149); Th2-Associated (12574343); Resistin SF           | 10.1                           | 2.14E-03             |                                  |                      |                                       |                      |                              |                      |
| SERPINB2                                                   | Antiparasitic Response (23630350) M2-associated (23355731); SERPIN SF                | 9.8                            | 2.12E-04             |                                  |                      | 3.9                                   | 1.24E-02             | 16.2                         | 4.90E-32             |
| TFF1                                                       | Antiparasitic Response (21569362); Trefoil SF                                        | 705.1                          | 2.48E-05             |                                  |                      | 93.2                                  | 3.12E-06             | 25.9                         | 2.62E-06             |
| TFF2                                                       | Antiparasitic Response (22329990); Trefoil SF                                        | 25.1                           | 3.57E-02             |                                  |                      | 12.2                                  | 3.25E-02             | 37.1                         | 6.93E-10             |
| TFF3                                                       | Epithelial Wound Healing (16410243); IL-4 Induced (15004182); Trefoil SF             | 2.7                            | 2.49E-03             |                                  |                      | 2.4                                   | 2.78E-03             |                              |                      |
| <b>Complement Related</b>                                  |                                                                                      |                                |                      |                                  |                      |                                       |                      |                              |                      |
| FCN1                                                       | Complement Activation (20375620); PRR (21490156); FReD SF                            |                                |                      |                                  |                      | 2.5                                   | 2.74E-03             | 2.9                          | 9.94E-05             |
| FCN2                                                       | Complement Activation (19632990); PRR (15331601); FReD SF                            |                                |                      |                                  |                      |                                       |                      |                              |                      |
| C1QL2                                                      | Complement Fixation; BA13 Ligand (21262840); C1q SF                                  | 7.0                            | 4.51E-02             |                                  |                      | 15.4                                  | 1.39E-04             |                              |                      |
| C3                                                         | Complement Component; AZM SF; ANATO SF; IsoPREN C2-like SF; MG1 SF; NTR-like SF      | 1.7                            | 3.10E-02             |                                  |                      | 1.6                                   | 3.66E-02             |                              |                      |
| C4BPA                                                      | Complement Component; CCP SF                                                         | 4.3                            | 1.37E-03             |                                  |                      |                                       |                      |                              |                      |
| C4BPB                                                      | Complement Component; CCP SF                                                         | 3.1                            | 5.70E-06             |                                  |                      | 2.3                                   | 1.66E-04             |                              |                      |
| C9                                                         | Complement Component; MACPF SF                                                       | 1.6                            | 3.93E-02             |                                  |                      | 1.5                                   | 5.09E-02             |                              |                      |
| CFB                                                        | Alternative Complement Activation Pathway; CCP SF; TSP-1 SF; vWFA SF                 | 2.1                            | 1.92E-02             |                                  |                      | 1.9                                   | 2.38E-02             |                              |                      |
| CFI                                                        | Complement factor; SRCR SF                                                           | 1.7                            | 4.15E-02             |                                  |                      |                                       |                      |                              |                      |
| CFHR2                                                      | Factor H (FH)-related Protein Family; CCP SF                                         |                                |                      |                                  |                      | 2.2                                   | 4.39E-02             |                              |                      |
| <b>Cytokines, Chemokines, Growth Factors and Receptors</b> |                                                                                      |                                |                      |                                  |                      |                                       |                      |                              |                      |
| ACKR3                                                      | CXCL12 Receptor (16107333); CXK Chemokine R SF                                       | 1.5                            | 4.95E-02             |                                  |                      |                                       |                      |                              |                      |
| AZGP1                                                      | Adipocytokine (18663996); MHC1 SF; Immunoglobulin SF                                 |                                |                      |                                  |                      | 2.0                                   | 3.20E-02             |                              |                      |
| BDNF                                                       | Cytokine (19348610); Neurotrophic; NGF SF                                            | 2.7                            | 1.64E-02             |                                  |                      |                                       |                      |                              |                      |
| BMP7                                                       | Cytokine; Development; TGFβ SF                                                       | 2.4                            | 6.17E-05             |                                  |                      | 1.9                                   | 1.22E-03             |                              |                      |
| CCL23                                                      | CCR1 Ligand (15927850); CCL Chemokine SF                                             | 5.1                            | 1.56E-04             |                                  |                      | 3.1                                   | 2.69E-03             |                              |                      |
| CCL28                                                      | CCR3 Ligand (10975800); CCL Chemokine SF                                             | 2.3                            | 4.92E-03             |                                  |                      |                                       |                      |                              |                      |
| CCR1                                                       | CCL14 Receptor; CCL16 Receptor; CCL23 Receptor; CCL Chemokine R SF                   |                                |                      |                                  |                      | 1.9                                   | 3.11E-02             |                              |                      |
| CCR2                                                       | CCL2 Receptor; CCL7 Receptor; CCL13 Receptor; CCL Chemokine R SF                     | 2.5                            | 2.63E-03             |                                  |                      | 8.2                                   | 1.09E-08             |                              |                      |
| CRLF1                                                      | Cytokine (19933857); IL6 Receptor Ligand (19933857); Ig SF; FN3 SF                   | 7.1                            | 3.16E-05             |                                  |                      |                                       |                      |                              |                      |
| CSF3R                                                      | Cytokine Receptor; Lep Receptor Ig SF                                                | 2.7                            | 1.81E-02             |                                  |                      |                                       |                      |                              |                      |
| CXCL1                                                      | CXCR2 Ligand; CXK Chemokine SF                                                       | 2.9                            | 1.56E-02             |                                  |                      |                                       |                      |                              |                      |
| CXCL14                                                     | CXCR4 Ligand (28360196); CXK Chemokine SF                                            | 3.5                            | 9.85E-08             |                                  |                      | 2.4                                   | 2.69E-05             | 4.4                          | 2.73E-06             |
| CXCL16                                                     | CXCR6 Ligand; CXK Chemokine SF                                                       |                                |                      |                                  |                      |                                       |                      | 2.0                          | 2.89E-03             |
| CXCL17                                                     | GPR35 Ligand (25411203); CXK Chemokine SF                                            |                                |                      |                                  |                      |                                       |                      | 4.5                          | 7.44E-06             |
| CXCL6                                                      | CXCR1 Ligand; CXCR2 Ligand; CXK Chemokine SF                                         | 5.3                            | 2.39E-05             | 3.1                              | 1.01E-02             |                                       |                      |                              |                      |
| CXCL8                                                      | CXCR1 Ligand; CXCR2 Ligand; CXK Chemokine SF                                         | 3.4                            | 5.32E-04             |                                  |                      |                                       |                      |                              |                      |
| CXCR1                                                      | CXCL1 R; CXCL2 R; CXCL3 R; CXCL6 R; CXCL8 R; CXK Chemokine R SF                      | 2.7                            | 1.71E-02             |                                  |                      |                                       |                      |                              |                      |
| CXCR2                                                      | CXCL1 R; CXCL2 R; CXCL3 R; CXCL6 R; CXCL8 R; CXK Chemokine R SF                      | 2.8                            | 2.64E-02             |                                  |                      |                                       |                      |                              |                      |
| CXCR4                                                      | CXCL12 R; CXK Chemokine R SF                                                         | 1.9                            | 1.45E-02             |                                  |                      |                                       |                      |                              |                      |
| EGF                                                        | Wound Healing (2045428); LY SF; vWFA SF; EGF CA SF; PHA03099 SF                      | 2.5                            | 1.10E-03             |                                  |                      | 2.1                                   | 5.27E-04             |                              |                      |
| IL11                                                       | Cytokine (27312790); Th2-Associated (15699166); IL11 SF; IL6 SF                      | 19.4                           | 3.58E-04             |                                  |                      | 8.3                                   | 1.22E-03             | 21.6                         | 6.84E-03             |
| IL13RA2                                                    | (-) Regulator of IL-13 Signaling (12642602); Th2-Associated (17697639) IL6Ra-bind SF | 3.3                            | 5.25E-02             |                                  |                      |                                       |                      | 5.0                          | 7.15E-03             |
| IL17C                                                      | IL-17RE Ligand (21993849); IL17 SF                                                   |                                |                      |                                  |                      |                                       |                      |                              |                      |
| IL17RD                                                     | Positive Regulator of IL17 Receptor Signaling; IL17 R DN SF                          | 2.0                            | 2.03E-02             |                                  |                      |                                       |                      |                              |                      |
| IL18                                                       | Th1-Associated (10679398); IL1 SF                                                    | 2.3                            | 7.08E-03             |                                  |                      |                                       |                      |                              |                      |
| IL1A                                                       | Positive Regulator of Inflammation; IL1 SF                                           | 3.6                            | 1.30E-03             |                                  |                      |                                       |                      | 2.4                          | 1.55E-03             |
| IL1B                                                       | Positive Regulator of Inflammation; IL1 SF                                           | 5.5                            | 1.20E-03             |                                  |                      |                                       |                      |                              |                      |
| IL1R2                                                      | IL1B Decoy Receptor; M2-associated (8786316); I-set SF; Ig SF                        | 10.3                           | 2.46E-06             |                                  |                      | 3.8                                   | 1.61E-03             | 6.1                          | 1.51E-06             |
| IL1RAP                                                     | Th1-Associated (10925275); Ig SF; TIR 2 SF                                           | 2.9                            | 2.14E-03             |                                  |                      |                                       |                      |                              |                      |
| IL26                                                       | STAT1 Signaling (14764663); STAT3 Signaling (14764663); Th17-Associated (17676044)   | 4.1                            | 2.96E-03             |                                  |                      |                                       |                      |                              |                      |
| IL33                                                       | Th2-Associated (16286016); IL1 SF; IL33 SF                                           | 2.0                            | 9.72E-04             |                                  |                      | 1.7                                   | 1.40E-02             |                              |                      |
| IL36A                                                      | Positive Regulator of Inflammation (23029241); IL1 SF                                | 22.7                           | 3.90E-04             |                                  |                      | 6.8                                   | 6.44E-03             | 7.2                          | 2.58E-03             |
| IL36B                                                      | Positive Regulator of Inflammation (16646978); IL1 SF                                |                                |                      |                                  |                      |                                       |                      | 30.8                         | 1.02E-02             |
| IL6                                                        | Positive Regulator of Inflammation; Th2-Associated (12431386); IL6 SF                | 6.5                            | 1.29E-04             |                                  |                      |                                       |                      |                              |                      |
| MDK                                                        | Cytokine; PTN MK N SF                                                                |                                |                      |                                  |                      |                                       |                      | 2.8                          | 4.44E-04             |
| NRG1                                                       | Cytokine (12204892); Ig SF; EGF CA SF; Neuregulin SF                                 | 4.3                            | 8.21E-05             |                                  |                      |                                       |                      | 3.8                          | 2.41E-02             |
| OSM                                                        | Positive Regulator of Inflammation (12496442); LIF OSM SF                            | 4.4                            | 1.92E-04             |                                  |                      | 2.4                                   | 1.97E-02             |                              |                      |
| OSMR                                                       | Type I Cytokine Receptor Family; IL6Ra-bind SF                                       | 2.0                            | 1.41E-04             |                                  |                      | 1.6                                   | 1.24E-02             |                              |                      |
| PTN                                                        | Cytokine; PTN MK N SF                                                                |                                |                      |                                  |                      |                                       |                      | 1.9                          | 1.03E-02             |
| TNFRSF10B                                                  | Positive Regulator of Apoptosis (9311998); DD SF; TNFR SF                            | 1.8                            | 3.08E-03             |                                  |                      |                                       |                      |                              |                      |
| TNFRSF11A                                                  | TNFR SF                                                                              | 1.7                            | 3.61E-02             |                                  |                      |                                       |                      |                              |                      |
| TNFRSF11B                                                  | Crohn's Disease (15803021); Decoy Receptor; DD SF; TNFR SF                           | 4.6                            | 1.51E-04             |                                  |                      | 3.9                                   | 5.64E-05             |                              |                      |
| TNFRSF12A                                                  | Positive Regulator of Apoptosis (21525013); Wound Healing (11728344); TNFR SF        | 5.0                            | 6.86E-10             | 2.0                              | 2.26E-02             | 2.5                                   | 1.07E-04             |                              |                      |
| TNFRSF26                                                   | TNFR SF                                                                              |                                |                      |                                  |                      |                                       |                      | 2.5                          | 2.44E-02             |
| TNFRSF6B                                                   | Decoy Receptor; Th2-Associated (14657214); TNFR SF                                   | 2.4                            | 4.77E-03             |                                  |                      |                                       |                      |                              |                      |
| TNFRSF8                                                    | TNFRSF8 Receptor; Th2-associated (9036953); TNFR SF                                  |                                |                      |                                  |                      |                                       |                      | 4.0                          | 2.04E-02             |
| TNFSF15                                                    | Th1-Associated (14568967); TNF SF                                                    | 1.8                            | 2.54E-02             |                                  |                      |                                       |                      |                              |                      |
| TNFSF18                                                    | TNFRSF18/GITR Ligand; TNF SF                                                         |                                |                      |                                  |                      |                                       |                      | 3.8                          | 3.17E-02             |



|          |                                                                                             |       |          |      |          |      |          |      |          |
|----------|---------------------------------------------------------------------------------------------|-------|----------|------|----------|------|----------|------|----------|
| SRGN     | Mast Cell Secretory Granule Protein (15231821); Serglycin SF                                | 1.8   | 2.61E-03 | 2.1  | 1.18E-05 |      |          |      |          |
| MCPT3*   | Mast Cell Protease; Tryp SPC SF                                                             | 7.3   | 2.80E-02 |      |          |      |          |      |          |
| TPSB2    | Mast Cell Protease; Tryp SPC SF                                                             |       |          |      |          |      |          | 2.8  | 2.68E-02 |
| HDC      | Biosynthesis of Histamine; Mast Cell Associated; AAT I SF                                   |       |          | 2.7  | 2.39E-02 |      |          |      |          |
| KIT      | (+) Positive Regulator of Mast Cell Development (25062998); Ig SF PKC-like SF               |       |          | 2.3  | 1.73E-02 |      |          |      |          |
|          | <b>M2-Macrophage Associated</b>                                                             |       |          |      |          |      |          |      |          |
| ARG1     | Antiparasitic Response (19764983); M2-associated (5879104); Arginase HDAC SF                | 122.6 | 4.56E-05 |      |          | 16.6 | 8.41E-04 | 30.1 | 2.28E-07 |
| CD163    | PRR (18849484); M2-associated (15491976); SRCR SF                                           | 1.9   | 4.34E-02 |      |          | 1.9  | 2.29E-02 |      |          |
| CHIA     | Antiparasitic Response (15618176); Th2-Associated (11553626); GH18 Chitinase Like SF        | 2.3   | 3.56E-02 |      |          |      |          |      |          |
| CLEC10A  | M2-associated (15591125); PRR (15802303); CLECT SF                                          | 3.6   | 2.24E-02 |      |          | 2.9  | 3.05E-02 |      |          |
| F13A1    | Coagulation; M2-associated (19105661); Transglutaminase SF                                  | 4.4   | 1.41E-09 | 2.1  | 7.07E-03 | 2.1  | 1.19E-03 |      |          |
| IL1R2    | IL1B Decoy Receptor; M2-associated (8786316); I-set SF; Ig SF                               | 10.3  | 2.46E-06 |      |          | 3.8  | 1.61E-03 | 6.1  | 1.51E-06 |
| IRAK3    | IL-1 Receptor-associated Kinase; M2-associated (2109822); DD SF; PKC-like SF                |       |          |      |          |      |          |      |          |
| IRF4     | Antiparasitic Response (20729857); M2-associated (20729857); IRF TF SF                      | 2.1   | 2.55E-03 |      |          |      |          |      |          |
| MMP12    | Metalloprotease; Th2/M2-Associated (12842850, 22880008); HX SF; ZnMc SF                     | 101.0 | 2.26E-14 | 7.3  | 1.09E-03 | 13.9 | 7.63E-10 | 9.7  | 4.45E-16 |
| MMP13    | Metalloprotease; M2-Associated (12842850); HX SF; ZnMc SF                                   | 20.2  | 1.77E-06 |      |          | 11.4 | 2.65E-07 | 27.5 | 9.71E-29 |
| MMP20    | Metalloproteinase; M2-associated (22880008); HX SF; ZnMc SF; PG-binding-1 SF                | 7.4   | 4.14E-02 |      |          |      |          |      |          |
| MMP8     | Metalloprotease; M2-associated (26092731); PG binding 1 SF; ZnMc SF; HX SF                  | 27.1  | 7.94E-03 |      |          | 11.4 | 3.47E-03 |      |          |
| MMP9     | Metalloprotease; M2-associated (26377769); PG Binding 1 SF; ZnMc SF; PT SF; HX SF           | 8.9   | 1.02E-08 | 3.4  | 3.03E-03 | 2.6  | 6.92E-03 | 9.3  | 1.00E-02 |
| ODC1     | M2-associated (19726720); Ornithine Metabolism; Polyamine Metabolism; PLPDE III SF          |       |          | -1.5 | 1.27E-02 | 1.6  | 4.12E-03 |      |          |
| OSM      | M2a-associated (26801095); LIF OSM SF                                                       | 4.4   | 1.92E-04 |      |          | 2.4  | 1.97E-02 |      |          |
| PTGS2    | Prostaglandin E2 Biosynthesis; M2-associated (17082649); EGF CA; An Peroxidase-like SF      | 2.3   | 9.54E-06 | 1.7  | 6.80E-03 |      |          |      |          |
| PTGS2    | Prostaglandin H2 Biosynthesis; M2-associated (28684424); EGF CA; An Peroxidase-like SF      | 6.5   | 8.39E-06 |      |          | 3.4  | 8.84E-04 | 4.0  | 1.30E-07 |
| SERPINB2 | Antiparasitic Response (23630350) M2-associated (23355731); SERPIN SF                       | 9.8   | 2.12E-04 |      |          | 3.9  | 1.24E-02 | 16.2 | 4.90E-32 |
| SERPINB6 | M2-associated (23293084); Serine Protease Inhibitor; SERPIN SF                              |       |          |      |          |      |          | 2.0  | 1.67E-02 |
| SLC7A2   | Arginine Transport (8954799); M2-associated (16670299); Solute Carrier SF                   | 1.9   | 4.15E-02 |      |          |      |          |      |          |
| TGM2     | M2-associated (23293084); Transglutaminase SF                                               | 2.2   | 3.66E-05 |      |          |      |          | 2.2  | 7.15E-03 |
| TIMP1    | Metalloproteinase Inhibitor; M2-associated (21926236); NTR-like SF                          | 4.3   | 2.48E-09 |      |          | 2.9  | 2.65E-07 | 3.9  | 2.94E-04 |
| TREM2    | PRR (12847223); Ig SF                                                                       |       |          | -2.5 | 4.89E-02 | 3.0  | 7.72E-03 |      |          |
|          | <b>Mucus and Fluid Production</b>                                                           |       |          |      |          |      |          |      |          |
| A3GALT2  | Galactosyltransferase; Glyco Tranf GTA Type SF                                              | 40.6  | 5.54E-03 |      |          | 9.7  | 1.38E-02 |      |          |
| AGR2     | Mucin Biosynthesis (24942678); Thioredoxin-like SF                                          | 6.5   | 1.79E-05 |      |          | 5.7  | 6.15E-07 | 5.6  | 1.73E-11 |
| AQP3     | Glycerol Transport (16079275); Water Transport (16079275); MIP SF                           |       |          |      |          |      |          |      |          |
| AQP5     | Water Transporter (9195910); MIP SF                                                         | 33.5  | 4.54E-04 |      |          | 10.2 | 1.63E-03 |      |          |
| AQP9     | Water Transport; Glycerol Transport (19096786); MIP SF                                      | 5.3   | 1.56E-02 |      |          |      |          |      |          |
| B3GNT6   | Mucin Biosynthesis (26274979); Galactosyl T SF                                              | 3.0   | 2.31E-03 |      |          | 2.9  | 5.44E-04 | 2.3  | 7.21E-03 |
| CLCA1    | Chloride Ion Transport (8769986); Th2-associated (17898169); CLCA N SF; vWFA SF             | 3.2   | 1.07E-03 |      |          | 2.8  | 6.25E-04 | 3.5  | 9.80E-09 |
| FUT2     | Fucosyltransferase (24062455); Th2-associated (12652082); O-FucT-like SF                    |       |          |      |          |      |          | 3.1  | 1.38E-03 |
| FUT8     | Mucin Biosynthesis (28122822); O-FucT-like SF; SH3 SF                                       | 1.6   | 5.97E-03 |      |          |      |          |      |          |
| GALNT1   | Mucin Biosynthesis; Glyco Tranf GTA-type SF; RICIN SF                                       | 1.5   | 4.20E-02 |      |          |      |          |      |          |
| GALNT6   | Mucin Biosynthesis (20215525); Glyco Tranf GTA-type SF                                      | 1.7   | 1.20E-02 |      |          | 2.2  | 3.33E-06 | 2.5  | 5.55E-03 |
| GALNT7   | Mucin Biosynthesis Glyco Tranf GTA-type SF; RICIN SF                                        | 1.9   | 5.18E-04 |      |          | 1.7  | 2.49E-03 |      |          |
| GCNT3    | IL-13 Induced (17303715); Mucin Biosynthesis (20816165); Branch SF                          | 2.7   | 1.21E-03 |      |          | 2.1  | 7.34E-03 | 2.4  | 4.06E-04 |
| MUC2     | Secreted Gel Forming Mucin (24942678); Th2-associated (14594655); Mucin SF                  | 5.2   | 7.10E-08 |      |          | 3.8  | 1.60E-07 | 6.3  | 2.16E-16 |
|          | <b>Miscellaneous</b>                                                                        |       |          |      |          |      |          |      |          |
| ANXA8    | Anticoagulant (2530088); Annexin SF                                                         | 21.8  | 2.21E-07 |      |          | 7.6  | 1.18E-05 | 34.8 | 6.97E-40 |
| CHI3L1   | GH18 Chitinase Like SF                                                                      | 13.9  | 2.38E-06 |      |          | 5.2  | 2.51E-04 | 6.4  | 1.03E-13 |
| CHI3L2   | GH18 Chitinase Like SF                                                                      | 6.0   | 7.37E-04 |      |          |      |          | 4.2  | 4.97E-04 |
| CHIT1    | GH18 Chitinase Like SF                                                                      | 24.2  | 1.65E-02 |      |          |      |          |      |          |
| CLTC     | (-) Regulator of NF-kB Activation (21364927); Clathrin SF                                   | 1.5   | 3.32E-02 |      |          |      |          |      |          |
| FCGBP    | Ig Receptor; VWD SF; C8 SF; TIL SF; VWC SF                                                  | 2.3   | 2.08E-02 |      |          |      |          |      |          |
| GJA1     | Epithelial Wound Repair (19528242); Connexin SF; Connexin CCC SF; Connexin 43 SF            | 2.4   | 6.11E-05 |      |          |      |          |      |          |
| GZMA     | Tryp SPC SF                                                                                 |       |          | 3.0  | 4.54E-04 |      |          |      |          |
| GZMB     | Tryp SPC SF                                                                                 | 5.5   | 2.79E-04 | 11.2 | 8.54E-08 |      |          |      |          |
| IGH@     | Ig SF; Ig Heavy Chain Constant Region SF                                                    | 5.7   | 2.70E-05 |      |          | 2.6  | 1.24E-02 |      |          |
| IGHG1    | Ig SF; Ig Heavy Chain Constant Region SF                                                    | 29.1  | 1.93E-04 |      |          | 10.3 | 8.11E-04 | 11.1 | 3.80E-06 |
| IGJ      | Immunoglobulin J polypeptide; Ig J-Chain SF                                                 | 1.8   | 2.63E-02 |      |          |      |          |      |          |
| KLRJ1*   | CLECT SF                                                                                    | 10.0  | 5.18E-04 | 9.6  | 1.59E-03 |      |          |      |          |
| MYOF     | Membrane Regeneration and Repair; C2 SF; FerA SF; FerB SF; DysFN SF                         | 2.2   | 3.03E-05 |      |          | 1.9  | 1.39E-04 |      |          |
| NEUROG3  | (+) Regulator of Enteroendocrine Cell Differentiation (17706959); HLH SF                    | 5.7   | 1.61E-03 |      |          | 3.8  | 3.07E-03 |      |          |
| NLR3     | Inflammasome Associated (21191067); LRR RI SF; P-loop NTPase SF                             |       |          | 2.5  | 1.97E-02 |      |          |      |          |
| NTRK1    | Allergic Inflammation (25389033); IL-4 Induced; Ig SF; LRRCT SF                             | 42.0  | 2.62E-07 | 10.6 | 3.53E-03 |      |          |      |          |
| PADI1    | (-) Regulator of Inflammation (18710930); PAD SF                                            | 296.4 | 3.51E-03 |      |          | 51.6 | 6.25E-04 |      |          |
| PADI3    | PAD SF                                                                                      | 55.7  | 1.75E-02 |      |          | 19.0 | 4.69E-03 |      |          |
| PRG4     | HX SF; Somatomedin B SF                                                                     | 10.7  | 1.39E-02 |      |          | 13.5 | 3.43E-04 |      |          |
| S100A10  | Inflammation (16373665); S100 SF                                                            |       |          |      |          |      |          |      |          |
| S100A11  | RAGE Ligand (18331229); S100 SF                                                             |       |          |      |          | 1.5  | 3.35E-02 |      |          |
| S100A12  | RAGE Ligand (18331229); Inflammation (12740341); S100 SF                                    | 38.4  | 4.48E-04 |      |          | 13.4 | 7.36E-04 | 12.8 | 4.09E-05 |
| S100A2   | Eosinophil Chemoattractant (8607858); S100 SF                                               | 7.4   | 9.54E-06 |      |          | 4.2  | 1.75E-04 | 10.0 | 3.03E-27 |
| S100A3   | S100 SF                                                                                     | 8.0   | 6.29E-03 |      |          | 4.5  | 2.35E-02 |      |          |
| S100A6   | RAGE Ligand (18331229); S100 SF                                                             | 1.6   | 3.06E-02 |      |          | 1.6  | 1.55E-02 |      |          |
| S100A8   | RAGE Ligand; Inflammation (12645005); S100 SF                                               | 38.3  | 5.18E-04 |      |          | 10.8 | 2.17E-03 | 8.2  | 1.02E-02 |
| S100A9   | RAGE Ligand; Inflammation (12645005); S100 SF                                               | 44.8  | 2.59E-04 |      |          | 11.0 | 2.03E-03 | 9.8  | 1.83E-03 |
| SCGB2A2  | Lipophilin SF Secretoglobin SF; Uteroglobin SF                                              | 105.1 | 3.14E-07 |      |          | 17.9 | 4.89E-06 |      |          |
| SCGB3A1  | IL-4 Induced (16237061); Lipophilin SF Secretoglobin SF; Uteroglobin SF                     | 8.8   | 1.90E-02 |      |          |      |          |      |          |
| SMPDL3B  | (-) Regulator of TLR Signaling (26095358); MPP SF                                           |       |          |      |          |      |          | 2.0  | 1.67E-02 |
| SOCS3    | Th2-associated (11907070); Th17-associated (16698929)                                       | 2.5   | 1.07E-03 |      |          |      |          |      |          |
| THBD     | Th2 Associated (189478630); CLECT SF; EGF CA SF; Tme5 EGF-like SF                           | 1.8   | 2.09E-02 |      |          | 1.9  | 3.32E-03 |      |          |
| TIGIT    | (-) Regulator of DC Function (19011627); TFH Cell Associated (19197944); Ig SF              | 2.5   | 3.55E-03 | 2.8  | 3.39E-04 |      |          |      |          |
| TNIP3    | (-) Regulator of TLR4 Signaling (17088249); Tape Meas Lam C SF; BAN SF                      | 7.3   | 4.56E-05 |      |          | 3.5  | 3.16E-03 | 4.5  | 5.90E-06 |
| TRAIIP   | (-) Regulator of TLR Signaling (14676304); RING Ubox SF                                     |       |          |      |          | 1.9  | 5.08E-03 |      |          |
| VSTM1    | (-) Regulator of Monocyte/Neutrophil Function (20375307, 23436183); Ig SF                   | 2.3   | 1.95E-02 |      |          | 2.3  | 7.89E-03 |      |          |
| WNT7A    | Wound healing (15802269); WNT SF                                                            |       |          |      |          |      |          |      |          |
| XDH      | (+) Regulator of Inflammation (h) (20632067); Fer2 2 SF; CO Deh Flav C SF; Ald Xan Dh C2 SF | 22.8  | 3.03E-02 |      |          |      |          |      |          |
|          | <b>Neurotransmitters and Receptors</b>                                                      |       |          |      |          |      |          |      |          |
| ABAT     | GABA aminotransferase; AAT I SF                                                             | 2.7   | 2.61E-02 |      |          | 3.1  | 1.97E-03 | 3.2  | 1.73E-05 |
| AVPR1B   | Arginine Vasopressin Receptor; GPCR SF                                                      | 62.6  | 5.42E-03 |      |          |      |          |      |          |
| BDKRB1   | Bradykinin Receptor; GPCR SF                                                                | 4.0   | 1.65E-03 |      |          |      |          | 4.6  | 1.70E-02 |
| DOK7     | Postsynaptic Differentiation; PH-like SF                                                    |       |          |      |          |      |          |      |          |
| DRD2     | Dopamine receptor D2; Neurotransmitter Receptor; GPCR SF                                    |       |          |      |          |      |          |      |          |
| GABRD    | GABA Receptor; Neurotransmitter Receptor; Neur Chan LBD SF; Neur Chan Memb SF               | 2.5   | 4.65E-02 |      |          | 3.4  | 4.54E-04 |      |          |
| GABRP    | GABA Receptor; Neur Chan LBD SF Neur Chan Memb SF                                           |       |          |      |          |      |          | 15.7 | 1.59E-03 |



Supplemental Table S8: Clustered Down-regulation of Physiology and Immunology DEGs

| Gene                                       | Functional Categorization                                                                            | S2 DPI w worms vs Control Fold | EDGE FDR Adj p value | S2 DPI w/o worms vs Control Fold | EDGE FDR Adj p value | (S2 DPI Inf w/o worms vs w Worms Fold | EDGE FDR Adj p value | (Z1 DPI Inf vs Control) Fold | EDGE FDR Adj p value |
|--------------------------------------------|------------------------------------------------------------------------------------------------------|--------------------------------|----------------------|----------------------------------|----------------------|---------------------------------------|----------------------|------------------------------|----------------------|
| <b>Antigen Processing and Presentation</b> |                                                                                                      |                                |                      |                                  |                      |                                       |                      |                              |                      |
| ADAM23                                     | Positive Regulator of Antigen Presentation (27317750); ZnMc SF                                       |                                |                      |                                  |                      |                                       |                      |                              |                      |
| B2M                                        | Positive Regulator of Surface Expression of MHC Class I (16181333); Ig SF                            | -2.0                           | 5.66E-04             |                                  |                      |                                       |                      |                              |                      |
| CD74                                       | MHC Chaperone (22306692); MHC2-interact SF                                                           | -2.5                           | 2.92E-04             |                                  |                      | -2.0                                  | 7.72E-03             |                              |                      |
| CITA                                       | Positive Regulator of MHC Class I and II Expression (14678199, (11486010); LRR SF                    |                                |                      |                                  |                      | -1.7                                  | 4.54E-02             |                              |                      |
| CLEC4F                                     | Glycolipid Antigen Presentation (23762286)                                                           | -4.6                           | 4.26E-02             |                                  |                      |                                       |                      |                              |                      |
| CTSD                                       | Antigen Processing and Presentation (16920965); Pepsin Retropepsin-like SF                           |                                |                      |                                  |                      | -1.6                                  | 1.68E-02             |                              |                      |
| ERAP2                                      | Antigen Processing and Presentation (12799365); Type 2 IFN Induced (12799365); GluZincin SF          | -1.6                           | 4.60E-02             |                                  |                      |                                       |                      |                              |                      |
| LGALS3BP                                   | Antigen Processing and Presentation (15231701); SRCR SF                                              | -1.9                           | 3.18E-02             |                                  |                      |                                       |                      |                              |                      |
| PLCB2                                      | (+) Regulator of B Cell Activation (20871625); PH-like SF; EF-hand-like SF; PI-PLC GDP SF SF; C2 SF  | -2.0                           | 1.74E-03             |                                  |                      |                                       |                      |                              |                      |
| PSMB10                                     | Immunoproteasome Protease (9551082); Ntn Hydrolase SF; Pr Beta C SF                                  | -1.8                           | 3.20E-03             |                                  |                      |                                       |                      |                              |                      |
| PSMB8                                      | Immunoproteasome Protease; Ntn Hydrolase SF; Pr Beta C SF                                            | -1.6                           | 2.91E-02             |                                  |                      |                                       |                      |                              |                      |
| PSMB9                                      | Immunoproteasome Protease; Ntn Hydrolase SF; Pr Beta C SF                                            | -1.8                           | 9.65E-03             |                                  |                      |                                       |                      |                              |                      |
| PSME1                                      | Antigen Processing and Presentation (12200048); PA28 Alpha SF; PA28 Beta SF                          | -1.6                           | 5.26E-03             |                                  |                      |                                       |                      |                              |                      |
| SLA-11                                     | MHC Class I SF                                                                                       | -2.3                           | 1.08E-04             |                                  |                      | -1.6                                  | 4.46E-02             |                              |                      |
| SLA-2                                      | MHC Class I SF                                                                                       |                                |                      |                                  |                      | -1.7                                  | 5.02E-02             |                              |                      |
| SLA-3                                      | MHC Class I SF                                                                                       | -2.3                           | 1.89E-04             |                                  |                      |                                       |                      | -1.8                         | 3.72E-02             |
| SLA-8                                      | MHC Class I SF                                                                                       | -1.6                           | 1.98E-02             |                                  |                      | -1.6                                  | 4.54E-02             |                              |                      |
| SLA-DMA                                    | MHC Class II SF                                                                                      | -2.1                           | 4.61E-03             |                                  |                      |                                       |                      | -1.9                         | 1.99E-02             |
| SLA-DMB                                    | MHC Class II SF                                                                                      | -2.2                           | 8.10E-04             |                                  |                      | -1.7                                  | 2.70E-02             | -2.4                         | 3.61E-04             |
| SLA-DOA                                    | MHC Class II SF                                                                                      | -2.4                           | 3.71E-03             |                                  |                      |                                       |                      |                              |                      |
| SLA-DQA1                                   | MHC Class II SF                                                                                      | -2.3                           | 3.27E-03             |                                  |                      | -2.0                                  | 1.33E-02             |                              |                      |
| SLA-DQB1                                   | MHC Class II SF                                                                                      | -2.3                           | 1.13E-02             |                                  |                      |                                       |                      | -2.5                         | 1.55E-03             |
| SLA-DRA                                    | MHC Class II SF                                                                                      | -2.4                           | 1.06E-03             |                                  |                      | -2.1                                  | 5.53E-03             |                              |                      |
| SLA-DRB1                                   | MHC Class II SF                                                                                      | -2.2                           | 5.60E-03             |                                  |                      | -2.0                                  | 1.25E-02             |                              |                      |
| TAP1                                       | Peptide Transporter; ABC Membrane SF                                                                 | -1.9                           | 5.73E-03             |                                  |                      | -1.7                                  | 2.23E-02             |                              |                      |
| TAP2                                       | Peptide Transporter; ABC Membrane SF                                                                 | -1.6                           | 1.31E-02             |                                  |                      |                                       |                      |                              |                      |
| <b>Cytokines, Chemokines and Receptors</b> |                                                                                                      |                                |                      |                                  |                      |                                       |                      |                              |                      |
| ADIPOQ                                     | Adipocytokine; C1q SF                                                                                | -4.2                           | 5.00E-04             |                                  |                      |                                       |                      | -2.2                         | 4.06E-03             |
| ANGPTL4                                    | Adipocytokine; FReD SF                                                                               | -2.9                           | 1.19E-03             | -2.0                             | 4.70E-02             |                                       |                      |                              |                      |
| BMP3                                       | Bone Morphogenetic Protein (BMP) Family; TGFβ SF                                                     |                                |                      |                                  |                      |                                       |                      | -2.5                         | 2.94E-03             |
| CCL2                                       | CCR2 Ligand; CCL Chemokine SF                                                                        |                                |                      |                                  |                      |                                       |                      | -2.0                         | 1.38E-03             |
| CCL21                                      | CCR7 Ligand; CCL Chemokine SF                                                                        | -1.7                           | 4.86E-02             |                                  |                      |                                       |                      |                              |                      |
| CCL3L1                                     | CCL Chemokine SF                                                                                     |                                |                      |                                  |                      |                                       |                      | -5.6                         | 2.84E-03             |
| CCL3L2                                     | CCL Chemokine SF                                                                                     | -5.4                           | 6.08E-03             |                                  |                      |                                       |                      | -10.6                        | 5.90E-03             |
| CCL4                                       | CCR5 Ligand; CCL Chemokine SF                                                                        | -2.4                           | 1.16E-02             |                                  |                      |                                       |                      |                              |                      |
| CCL8                                       | CCR1 Ligand; CCL Chemokine SF                                                                        | -2.6                           | 7.80E-03             |                                  |                      |                                       |                      | -2.8                         | 4.24E-02             |
| CCR5                                       | CCL3 Receptor; CCL4 Receptor; CCL5 Receptor; CCL Chemokine Receptor SF                               | -1.8                           | 5.37E-03             |                                  |                      |                                       |                      |                              |                      |
| CCR9                                       | CCL25 Receptor; CCL Chemokine Receptor                                                               | -3.0                           | 5.47E-02             |                                  |                      |                                       |                      | -5.8                         | 1.14E-02             |
| CNTRF                                      | Cytokine Receptor (10812968); FN3 SF; Ig SF                                                          | -3.5                           | 4.40E-04             |                                  |                      | -2.9                                  | 3.11E-03             |                              |                      |
| CSF1                                       | Cytokine; Positive Regulator of Macrophage Development.                                              | -1.5                           | 3.58E-02             |                                  |                      | -1.5                                  | 1.68E-02             |                              |                      |
| CSF1R                                      | CSF1 Receptor                                                                                        | -1.7                           | 3.70E-03             |                                  |                      | -1.5                                  | 4.54E-02             |                              |                      |
| CSF2RB                                     | GM-CSF/IL-3/IL-5 receptor Common Beta-Chain; Erythropoietin Receptor SF; FN3 SF; IL6Ra-bind SF       |                                |                      |                                  |                      | -1.5                                  | 4.36E-02             |                              |                      |
| CXCL10                                     | Type 2 IFN Induced; CXCR3 Ligand; CXC Chemokine SF                                                   | -3.4                           | 3.22E-02             |                                  |                      | -4.4                                  | 7.18E-03             |                              |                      |
| CXCL11                                     | Type 2 IFN Induced; CXCR3 Ligand; CXC Chemokine SF                                                   | -4.8                           | 3.33E-02             |                                  |                      |                                       |                      |                              |                      |
| CXCL12                                     | CXCR4 Ligand; CXC Chemokine SF                                                                       | -2.7                           | 6.31E-04             |                                  |                      | -2.8                                  | 2.48E-04             | -2.3                         | 5.03E-03             |
| CXCL13                                     | CCL10 Ligand; CXCR5 Ligand; CXC Chemokine SF                                                         |                                |                      |                                  |                      |                                       |                      | -5.8                         | 5.77E-08             |
| CXCL9                                      | Type 2 IFN Induced; CXCR3 Ligand; CXC Chemokine SF                                                   | -7.5                           | 6.02E-04             |                                  |                      | -5.7                                  | 3.65E-03             | -6.1                         | 7.08E-08             |
| CXCR3                                      | CXCL9 Receptor; CXCL10 Receptor; CXCL11 Receptor; CXCL Chemokine Receptor SF                         | -2.2                           | 1.38E-02             |                                  |                      |                                       |                      |                              |                      |
| EBI3                                       | FN3 SF                                                                                               | -2.0                           | 4.52E-02             |                                  |                      |                                       |                      |                              |                      |
| FLT3LG                                     | Flt3 Lig SF                                                                                          | -1.8                           | 3.71E-03             |                                  |                      |                                       |                      |                              |                      |
| GDF5                                       | Bone Morphogenetic Protein (BMP) Family; TGFβ SF                                                     | -3.8                           | 1.25E-02             | -3.3                             | 1.09E-03             |                                       |                      |                              |                      |
| IGF2                                       | IIGF-like SF                                                                                         | -3.2                           | 5.66E-04             |                                  |                      | -2.2                                  | 2.80E-02             |                              |                      |
| IL10RA                                     | Cytokine Receptor; Interferon-binding SF                                                             | -1.9                           | 8.53E-04             |                                  |                      | -1.5                                  | 3.17E-02             |                              |                      |
| IL12B                                      | Cytokine; IL12p40 SF                                                                                 | -4.7                           | 1.02E-02             |                                  |                      |                                       |                      |                              |                      |
| IL12RB2                                    | IL-12 Receptor; Th1-Associated (10666772); Lep Receptor Ig SF                                        | -2.3                           | 4.34E-02             |                                  |                      |                                       |                      |                              |                      |
| IL15                                       | Th1-Associated (12759422); IL15 SF; IL2G Receptor Binding SF                                         |                                |                      |                                  |                      |                                       |                      | -2.7                         | 3.09E-02             |
| IL17RA                                     | IL-17 Receptor; TIR 2 SF                                                                             | -1.5                           | 1.36E-02             |                                  |                      |                                       |                      |                              |                      |
| IL2RB                                      | IL2 Receptor; IL15 Receptor; FN3 SF                                                                  |                                |                      |                                  |                      | -1.7                                  | 2.69E-02             |                              |                      |
| IL34                                       | Cytokine; IL34 SF                                                                                    | -2.5                           | 3.63E-04             |                                  |                      | -2.1                                  | 4.12E-03             |                              |                      |
| KIT                                        | Ig SF; PKC-like SF                                                                                   |                                |                      |                                  |                      |                                       |                      | -2.3                         | 2.04E-02             |
| LIFR                                       | LIF Receptor; FN3 SF                                                                                 | -2.1                           | 4.05E-04             |                                  |                      | -1.7                                  | 7.18E-03             | -2.6                         | 3.03E-05             |
| LTBP3                                      | TGFβ Binding Protein EGF CA SF                                                                       | -1.6                           | 4.59E-02             |                                  |                      |                                       |                      |                              |                      |
| LTBP4                                      | TGFβ Binding Protein EGF CA SF                                                                       | -2.2                           | 9.11E-05             |                                  |                      | -1.8                                  | 5.61E-03             |                              |                      |
| MDK                                        | Cytokine; (+) Regulator of Inflammation (30217121); PTN MK N SF                                      | -2.0                           | 1.75E-02             |                                  |                      |                                       |                      |                              |                      |
| PDGFC                                      | Angiogenesis (20566880); CUB SF; PDGF SF                                                             |                                |                      |                                  |                      |                                       |                      | -2.3                         | 2.70E-03             |
| PF4                                        | CXC Chemokine SF                                                                                     |                                |                      |                                  |                      |                                       |                      | -3.2                         | 1.71E-02             |
| PGF                                        | PDGF SF                                                                                              | -1.9                           | 4.93E-02             |                                  |                      |                                       |                      |                              |                      |
| RARRES2                                    | Adipocytokine (17767914)                                                                             | -1.6                           | 4.83E-02             |                                  |                      |                                       |                      |                              |                      |
| THNSL2                                     | Cytokine (19877052); Trp-synth-beta II SF                                                            | -2.3                           | 1.15E-03             |                                  |                      |                                       |                      |                              |                      |
| TNFSF11                                    | Positive Regulator of Microfold Cell Differentiation (22778137); TH1-Associated (14607948); TNF SF   |                                |                      |                                  |                      |                                       |                      | -4.0                         | 1.83E-03             |
| TNFSF13B                                   | (+) Regulator of B Cell Activation (16797504); Th1-Associated (15843552); TNF SF                     |                                |                      |                                  |                      |                                       |                      | -2.5                         | 2.69E-04             |
| XCL1                                       | Th1-associated (14573634); XCR1 Receptor Ligand                                                      | -5.2                           | 1.96E-06             |                                  |                      | -2.7                                  | 5.72E-03             | -3.3                         | 3.63E-03             |
| <b>Extracellular Matrix and Remodeling</b> |                                                                                                      |                                |                      |                                  |                      |                                       |                      |                              |                      |
| ADAM1A                                     | Matelloprotease; Pep M12B Propep SF; ZnMc SF; Reprolysin SF; Disintegrin SF; ADAM CR SF              |                                |                      |                                  |                      |                                       |                      | -52.9                        | 1.87E-02             |
| ADAMTS19                                   | Matelloprotease; TSP 1 SF                                                                            |                                |                      |                                  |                      |                                       |                      | -2.6                         | 1.33E-02             |
| ADAMTS5                                    | Matelloprotease; Pep M12B Propep SF; ZnMc SF; TSP 1 SF; ADAM Spacer1 SF                              |                                |                      |                                  |                      |                                       |                      | -2.2                         | 1.84E-02             |
| ADAMTS8                                    | Matelloprotease; TSP 1 SF                                                                            |                                |                      |                                  |                      | -1.9                                  | 1.07E-02             |                              |                      |
| ADAMTS15                                   | Matelloprotease; TSP 1 SF                                                                            | -2.1                           | 3.76E-02             |                                  |                      |                                       |                      |                              |                      |
| ANPEP                                      | Aminopeptidase; GluZincin SF                                                                         | -5.2                           | 3.11E-04             | -2.5                             | 4.13E-02             |                                       |                      |                              |                      |
| ASTL                                       | Matelloprotease (15087446); ZnMc SF                                                                  | -37.2                          | 2.34E-02             |                                  |                      |                                       |                      | -49.0                        | 2.75E-02             |
| BSG                                        | Extracellular Matrix Remodeling (26084217); Treg-associated (23665204); Ig SF; KU SF                 |                                |                      |                                  |                      | -1.5                                  | 2.27E-02             |                              |                      |
| COL1A1                                     | Collagen SF                                                                                          |                                |                      |                                  |                      |                                       |                      | -1.7                         | 3.72E-02             |
| COL22A1                                    | Collagen SF                                                                                          |                                |                      |                                  |                      |                                       |                      | -56.8                        | 1.34E-02             |
| COL25A1                                    | Collagen SF                                                                                          |                                |                      |                                  |                      |                                       |                      | -5.6                         | 7.28E-04             |
| COL4A3                                     | Collagen SF                                                                                          | -2.4                           | 4.44E-02             |                                  |                      |                                       |                      |                              |                      |
| COL4A6                                     | Collagen SF                                                                                          | -1.6                           | 3.19E-02             |                                  |                      | -1.6                                  | 4.50E-02             |                              |                      |
| COL6A5                                     | Collagen SF                                                                                          |                                |                      |                                  |                      |                                       |                      | -2.0                         | 1.50E-02             |
| COL6A6                                     | Collagen SF                                                                                          | -7.8                           | 1.07E-07             |                                  |                      | -5.7                                  | 3.03E-06             | -5.7                         | 3.51E-08             |
| CST3                                       | Cysteine Protease Inhibitor; Extracellular Matrix Formation/Degradation (19468292); Cystatin (CY) SF |                                |                      |                                  |                      | -1.9                                  | 7.80E-03             | -2.3                         | 3.93E-04             |
| CSTA                                       | Protease Inhibitor; CY SF                                                                            | -1.9                           | 2.56E-02             |                                  |                      |                                       |                      |                              |                      |
| CTBS                                       | Asn-linked Glycoprotein Catabolism; GH18 Chitinase-like SF                                           | -3.6                           | 8.38E-03             |                                  |                      | -2.9                                  | 4.10E-02             |                              |                      |







|           |                                                                                                      |       |          |  |  |  |  |       |          |      |          |
|-----------|------------------------------------------------------------------------------------------------------|-------|----------|--|--|--|--|-------|----------|------|----------|
| IFI27     | Type 1 IFN Induced (20939681); Antiviral Response (27194766); Ifi-6-16 SF                            | -5.8  | 7.91E-04 |  |  |  |  | -3.9  | 1.12E-02 |      |          |
| IFI44     | Type 1 IFN Induced (7925411); Antiviral Immune Response (22896602); TLD SF                           | -2.9  | 1.80E-02 |  |  |  |  | -2.7  | 2.55E-02 |      |          |
| IFI44L    | Type 1 IFN Induced (21478870); Antigen Processing and Presentation (11021531); Ras-like GTPase SF    | -2.3  | 3.75E-03 |  |  |  |  | -2.0  | 1.59E-02 |      |          |
| IFITM1    | Type 1 IFN Induced (14980080); Antiviral Immune Response (22344284); CD225 SF                        | -2.6  | 1.45E-02 |  |  |  |  |       |          |      |          |
| IFITM1L2* | CD225 SF                                                                                             | -2.3  | 6.10E-05 |  |  |  |  | -1.7  | 8.91E-03 |      |          |
| IRF8      | Type 1 IFN-Induced; Type 1 IFN Signaling (15864272); IRF SF; IRF4 Subfamily (11997525)               | -1.6  | 1.94E-02 |  |  |  |  |       |          |      |          |
| MAP2K6    | Type 1 IFN Induced (15644321); Antiviral Response (15229216); PKC-like SF                            | -1.8  | 3.77E-02 |  |  |  |  | -1.8  | 4.90E-02 |      |          |
| MOV10     | Type 1 IFN Induced (21478870); Antiviral Response (26842467); AAA 11 SF; UvrD C 2 SF                 | -1.7  | 1.22E-03 |  |  |  |  | -1.5  | 1.20E-02 |      |          |
| MPEG1     | Type 1 and 2 IFN Induced (23257510); Antibacterial Responses (23257510); MACPF SF                    | -2.2  | 4.93E-03 |  |  |  |  | -2.1  | 5.72E-03 | -2.1 | 7.99E-03 |
| OASL      | Type 1 IFN-Induced (10087211); Antiviral Response (22531715); NT Pol-beta-like SF; OAS1 C SF; UBQ SF | -14.4 | 5.68E-03 |  |  |  |  | -12.1 | 1.20E-02 |      |          |
| PARP9     | Type 2 IFN Induced (16809771); Antiviral Response (26479788); Macro SF; ADP Ribosyl SF               |       |          |  |  |  |  | -1.9  | 1.04E-03 |      |          |
| RNF213    | Type 1 IFN Induced (10547268); RING Ubox SF                                                          | -1.8  | 4.61E-02 |  |  |  |  | -1.8  | 3.66E-02 |      |          |
| RSAD2     | Type 1 IFN-induced (9391139); Antiviral Immune Response (20308629, 22377585); Viperin SF             | -4.4  | 2.06E-02 |  |  |  |  | -4.3  | 2.28E-02 |      |          |
| THAP12    | Type 1 IFN Induced (21910972); Antiviral Response (21910972); THAP SF; Dimer Tnp hAT SF              | -10.5 | 4.27E-02 |  |  |  |  | -13.4 | 2.27E-02 |      |          |

Supplemental Table S9: Clustered Metabolism Genes (DEGs) Up-regulated

| Gene                                        | Functional Categorization                                                                        | S2 DPI w<br>vs Control<br>Fold | EDGE<br>FDR Adj p<br>value | S2 DPI w/o<br>worms vs Control<br>Fold | EDGE FDR<br>Adj p<br>value | (S2 DPI Inf<br>w/o worms<br>vs Worms<br>Fold | EDGE FDR<br>Adj p<br>value | (21 DPI Inf<br>vs Control)<br>Fold | EDGE FDR<br>Adj p value |
|---------------------------------------------|--------------------------------------------------------------------------------------------------|--------------------------------|----------------------------|----------------------------------------|----------------------------|----------------------------------------------|----------------------------|------------------------------------|-------------------------|
| <b>Amino Acid Metabolism or Transport</b>   |                                                                                                  |                                |                            |                                        |                            |                                              |                            |                                    |                         |
| ARG1                                        | Arginine Metabolism (3540966); M2-associated (5879104); Arginase HDAC SF                         | 122.6                          | 4.56E-05                   |                                        |                            | 16.6                                         | 8.41E-04                   |                                    |                         |
| ARG2                                        | Arginine Metabolism (16128822); Arginase HDAC SF                                                 | 1.7                            | 3.31E-02                   |                                        |                            | 1.6                                          | 2.16E-02                   |                                    |                         |
| BCAT1                                       | BCAA Catabolism (6933702); Glycolysis (28699638); PRK13357 SF                                    | 2.4                            | 4.81E-04                   |                                        |                            | 1.9                                          | 5.18E-03                   |                                    |                         |
| CBS                                         | Cysteine Metabolism (19010420); Serine Metabolism; Trp-synth-beta II SF; CBS Pair SF             | 3.4                            | 1.61E-03                   |                                        |                            | 3.5                                          | 7.42E-05                   | 5.5                                | 7.18E-05                |
| GNMT                                        | Homocysteine Metabolism (21411609); AdoMet MTases SF                                             |                                |                            |                                        |                            |                                              |                            | 4.3                                | 2.10E-02                |
| IL4I1L                                      | Putative L-amino acid oxidase; SDR SF                                                            | 161.2                          | 3.98E-05                   |                                        |                            | 26.0                                         | 1.39E-04                   | 437.7                              | 1.59E-14                |
| ODC1                                        | M2-associated (19726720); Ornithine Metabolism (2317811); Polyamine Metabolism; PLPDE III SF     |                                |                            | -1.5                                   | 1.27E-02                   | 1.6                                          | 4.12E-03                   |                                    |                         |
| PHGDH                                       | Serine Biosynthesis (27110680); SerA SF                                                          | 5.1                            | 3.92E-05                   |                                        |                            | 3.3                                          | 5.01E-04                   | 5.0                                | 9.01E-04                |
| PSAT1                                       | Serine Biosynthesis (12633500); AAT I SF                                                         | 7.2                            | 3.12E-04                   |                                        |                            | 3.9                                          | 3.89E-03                   | 20.6                               | 4.69E-11                |
| SDSL                                        | Serine Metabolism (16580895); Threonine Metabolism (16580895); Trp Synth beta II SF              | 39.6                           | 1.38E-02                   |                                        |                            |                                              |                            |                                    |                         |
| SHMT2                                       | Glycine Biosynthesis (25619277); Folate Biosynthesis; Serine Biosynthesis                        | 2.0                            | 2.65E-05                   |                                        |                            | 1.5                                          | 1.06E-02                   |                                    |                         |
| SLC12A8                                     | Amino Acid Transport (19472210); Polyamine Transport (19472210); Solute Carrier SF               | 3.5                            | 7.40E-04                   |                                        |                            | 3.1                                          | 3.65E-04                   |                                    |                         |
| SLC16A10                                    | Phenylalanine/Tryptophan/Tyrosine Transport (23045339); Solute Carrier SF                        | 1.8                            | 3.61E-02                   |                                        |                            |                                              |                            |                                    |                         |
| SLC1A2                                      | Glutamate Transport (7521911); SDF SF; Solute Carrier SF                                         | 3.0                            | 2.04E-03                   |                                        |                            | 2.1                                          | 2.44E-02                   |                                    |                         |
| SLC1A4                                      | Alanine/Cysteine/Proline Transport (8101838, 11824937; 14502423); Solute Carrier SF              | 2.5                            | 1.36E-03                   |                                        |                            |                                              |                            |                                    |                         |
| SLC1A5                                      | Glutamate/Glutamine Transport (21757002); Solute Carrier SF                                      | 1.8                            | 8.53E-04                   |                                        |                            | 1.6                                          | 5.72E-03                   |                                    |                         |
| SLC38A2                                     | Alanine/Asparagine/Cysteine/Glutamine Transport (12845534); Solute Carrier SF                    | 1.8                            | 2.90E-02                   |                                        |                            |                                              |                            |                                    |                         |
| SLC3A2                                      | BCAA Transport (9751058); Tryptophan Transport; Tyrosine Transport; Solute Carrier SF            | 1.8                            | 1.83E-03                   |                                        |                            |                                              |                            |                                    |                         |
| SLC6A9                                      | Glycine Transport (8183239); Solute Carrier SF                                                   | 1.8                            | 1.29E-02                   |                                        |                            |                                              |                            |                                    |                         |
| SLC7A1                                      | Arginine Transport (21302286); Lysine Transport (21302286); Solute Carrier SF                    | 1.6                            | 1.25E-02                   |                                        |                            | 1.5                                          | 3.05E-02                   |                                    |                         |
| SLC7A11                                     | Cystine Transport (10206947); Glutamate Transport (10206947); Solute Carrier SF                  |                                |                            |                                        |                            | 3.7                                          | 3.60E-02                   | 4.3                                | 6.75E-07                |
| SLC7A2                                      | Arginine Transport (8954799); M2-associated (16670299); Solute Carrier SF                        | 1.9                            | 4.15E-02                   |                                        |                            |                                              |                            |                                    |                         |
| SLC7A3L11*                                  | Putative Amino Acid Transporter; Solute Carrier SF                                               |                                |                            |                                        |                            |                                              |                            | 188.2                              | 1.59E-03                |
| SLC7A5                                      | BCAA Transport (9751058); Solute Carrier SF                                                      | 2.7                            | 7.21E-06                   |                                        |                            | 1.9                                          | 1.40E-03                   | 3.3                                | 1.30E-03                |
| SLC7A6                                      | Arginine Transport (19562367); Solute Carrier SF                                                 | 1.7                            | 2.15E-03                   |                                        |                            |                                              |                            |                                    |                         |
| SLC9C1                                      | Sodium-hydrogen Exchanger (14634667); Solute Carrier SF                                          |                                |                            |                                        |                            |                                              |                            | 4.1                                | 7.81E-04                |
| TAT                                         | Bioconversion of L-Tyrosine into p-Hydroxyphenylpyruvate; AAT I SF                               | 4.2                            | 4.00E-02                   |                                        |                            |                                              |                            | 6.9                                | 3.49E-02                |
| <b>Carbohydrate Metabolism or Transport</b> |                                                                                                  |                                |                            |                                        |                            |                                              |                            |                                    |                         |
| AACS                                        | Biosynthesis of Acetyl-Coenzyme A (20102333); AFD Class I SF                                     | 2.0                            | 4.99E-05                   |                                        |                            | 1.8                                          | 1.18E-04                   |                                    |                         |
| ACAT2                                       | Biosynthesis of Acetyl-Coenzyme A; Thiolase N SF                                                 | 3.5                            | 1.27E-10                   |                                        |                            | 2.5                                          | 4.51E-08                   |                                    |                         |
| ACLY                                        | Glycolysis; Lipid Biosynthesis (23932781); TCA Cycle; CCL SF                                     | 2.2                            | 5.17E-06                   |                                        |                            | 1.9                                          | 1.76E-05                   |                                    |                         |
| ALDOC                                       | Fructose Metabolism; Glycolysis; Aldolase Class I SF                                             | 1.6                            | 5.08E-02                   |                                        |                            | 1.7                                          | 1.06E-02                   |                                    |                         |
| BCAT1                                       | Glycolysis (28699638); PRK13357 SF                                                               | 2.4                            | 4.81E-04                   |                                        |                            | 1.9                                          | 5.18E-03                   |                                    |                         |
| DERL3                                       | Negative Regulator of SLC2A1 Expression (24699711); DER1 SF                                      | 2.2                            | 2.74E-04                   |                                        |                            | 1.7                                          | 7.70E-03                   |                                    |                         |
| GFPT1                                       | Biosynthesis of Glucosamine 6-phosphate (1460020); Gn AT II SF; SIS SF                           | 2.2                            | 1.21E-05                   |                                        |                            | 1.7                                          | 3.70E-03                   |                                    |                         |
| GS2                                         | Glycogen Synthase SF                                                                             |                                |                            |                                        |                            | 6.0                                          | 4.66E-02                   | 11.9                               | 5.62E-03                |
| PKC2                                        | Gluconeogenesis; Biosynthesis of Phosphoenolpyruvate (4291786); TCA Cycle; PEPCk HprK SF         | 2.0                            | 1.77E-03                   |                                        |                            | 2.0                                          | 3.22E-04                   |                                    |                         |
| HK2                                         | Glycolysis; Biosynthesis of Glucose-6-phosphate (19558793); NBD Sugar Kinase SF; Hexokinase 2 SF | 8.6                            | 2.40E-06                   |                                        |                            | 4.2                                          | 1.78E-04                   | 3.3                                | 1.33E-05                |
| PFKFB2                                      | Biosynthesis of Fructose-2,6-bisphosphate; Glycolysis; P-loop NTPase SF; HP SF                   | 1.9                            | 3.58E-02                   |                                        |                            |                                              |                            |                                    |                         |
| PFKFB3                                      | Biosynthesis of Fructose-2,6-bisphosphate; Glycolysis; P-loop NTPase SF; HP SF                   | 3.2                            | 4.64E-06                   |                                        |                            | 2.2                                          | 5.86E-04                   | 2.5                                | 7.15E-03                |
| PGK1                                        | Biosynthesis of 3-phosphoglycerate; Glycolysis; Phosphoglycerate Kinase SF                       | 1.8                            | 1.24E-03                   |                                        |                            | 1.5                                          | 1.73E-02                   |                                    |                         |
| PGM2                                        | Biosynthesis of Ribose 5-phosphate; Glycolysis (17804405); Phosphohexomutase SF                  | 1.6                            | 7.93E-03                   |                                        |                            |                                              |                            |                                    |                         |
| PGM3                                        | Biosynthesis of UDP-N-acetylglucosamine (11004509); Phosphohexomutase SF                         | 2.1                            | 7.37E-05                   |                                        |                            | 1.8                                          | 9.17E-04                   |                                    |                         |
| PKM                                         | Biosynthesis of Pyruvate; Glycolysis (12843653); Pyruvate Kinase SF                              | 1.9                            | 3.11E-04                   |                                        |                            | 1.7                                          | 1.40E-03                   | 2.2                                | 2.62E-02                |
| SDS                                         | Biosynthesis of Pyruvate; Glycolysis; Serine/Threonine Catabolism; Trp Synth Beta II SF          | 5.6                            | 1.53E-02                   |                                        |                            |                                              |                            | 5.7                                | 8.06E-05                |
| SLC25A35                                    | Isopropylmalate Transport (18682385); Solute Carrier SF                                          |                                |                            |                                        |                            | 2.0                                          | 9.64E-03                   |                                    |                         |
| SLC2A3                                      | Glucose Transport (20209635); Solute Carrier SF                                                  | 3.4                            | 1.42E-12                   | 2.7                                    | 1.71E-10                   |                                              |                            |                                    |                         |
| SLC37A3                                     | Glucose-6-phosphate Transport (21949678); Solute Carrier SF                                      | 1.5                            | 7.96E-03                   |                                        |                            |                                              |                            |                                    |                         |
| SLC50A1                                     | Glucose Transport (23506865); Solute Carrier SF                                                  |                                |                            |                                        |                            | 1.8                                          | 9.18E-04                   |                                    |                         |
| SLC5A1                                      | Glucose/Fructose/Mannose Transport (22212718); Solute Carrier SF                                 | 2.2                            | 2.73E-04                   |                                        |                            | 1.7                                          | 6.38E-03                   |                                    |                         |
| TKTL1                                       | Glycolysis (26273330)                                                                            |                                |                            | 6.4                                    | 1.49E-02                   |                                              |                            |                                    |                         |
| <b>Lipid Metabolism or Transport</b>        |                                                                                                  |                                |                            |                                        |                            |                                              |                            |                                    |                         |
| ABCA12                                      | Cholesterol Transport (23931754); ABC ATPase SF                                                  | 4.1                            | 1.91E-03                   |                                        |                            |                                              |                            | 2.3                                | 4.40E-02                |
| ABCA5                                       | Macrophage Cholesterol Metabolism (20382126); ABC ATPase SF                                      | 2.0                            | 4.93E-03                   |                                        |                            |                                              |                            |                                    |                         |
| ACACA                                       | Fatty Acid Biosynthesis (20457939); Acetyl-CoA Carboxylase SF; Biotinyl-lipoyl Domains SF        | 1.6                            | 4.83E-03                   |                                        |                            |                                              |                            |                                    |                         |
| ACSL3                                       | Fatty Acyl-CoA Ester Biosynthesis; AFD Class I SF; Acyl-CoA Synthetase SF                        | 2.0                            | 8.07E-05                   |                                        |                            | 1.7                                          | 2.03E-03                   |                                    |                         |
| ACSL4                                       | Fatty Acyl-CoA Ester Biosynthesis; AFD Class I SF; Acyl-CoA Synthetase SF                        | 1.5                            | 3.29E-02                   |                                        |                            |                                              |                            |                                    |                         |
| AOAH                                        | Lipid Metabolism (1883828); SGNH Hydrolase SF; SapB 2 SF                                         | 1.6                            | 5.28E-02                   | 1.7                                    | 2.02E-02                   |                                              |                            |                                    |                         |
| APOBR                                       | Lipoprotein Receptor; Neuromodulin N SF; Na Ca Ex SF                                             |                                |                            | 1.7                                    | 3.48E-02                   |                                              |                            |                                    |                         |
| CYP51A1                                     | Cholesterol Metabolism (12464255); Cytochrome P450                                               | 2.1                            | 1.08E-04                   |                                        |                            | 1.6                                          | 5.76E-03                   |                                    |                         |
| CYP7A1                                      | Cholesterol Metabolism (19965590); Cytochrome P450                                               | 12.7                           | 4.64E-02                   |                                        |                            |                                              |                            |                                    |                         |
| DGAT2                                       | Triglyceride Synthesis (11481335); NAT SF Superfamily                                            |                                |                            |                                        |                            | 1.8                                          | 3.05E-02                   |                                    |                         |
| DHCR7                                       | Cholesterol Biosynthesis (9465114); PEMT SF                                                      | 1.9                            | 3.19E-04                   |                                        |                            | 1.6                                          | 1.99E-03                   |                                    |                         |
| EBP                                         | Cholesterol Biosynthesis (17498944); EBP SF                                                      | 2.6                            | 1.17E-05                   |                                        |                            | 2.3                                          | 4.62E-06                   |                                    |                         |
| ELOVL6                                      | Fatty Acid Metabolism (19259639); ELO SF                                                         |                                |                            |                                        |                            | 2.4                                          | 1.46E-05                   |                                    |                         |
| FABP3                                       | Long-chain Fatty Acid Transport (3421901); Lipocalin SF                                          |                                |                            |                                        |                            | 2.3                                          | 1.30E-03                   | 3.3                                | 3.51E-08                |
| FADS1                                       | Fatty Acid Desaturase; Cyt-b5 SF; Membrane-FADS-like SF                                          | 2.4                            | 6.98E-08                   |                                        |                            | 1.8                                          | 8.80E-05                   |                                    |                         |
| FADS2                                       | Fatty Acid Desaturase; Cyt-b5 SF; Membrane-FADS-like SF                                          | 2.8                            | 2.38E-06                   |                                        |                            | 2.3                                          | 1.63E-05                   |                                    |                         |
| FASN                                        | Fatty Acid Biosynthesis (7835891); Acyl Transf 1 SF; NADB Rossmann SF                            | 2.1                            | 1.09E-04                   |                                        |                            | 1.7                                          | 3.60E-03                   |                                    |                         |
| FDFT1                                       | Cholesterol Biosynthesis (19054015); Isoprenoid Biosynthesis C1 SF                               | 1.9                            | 3.52E-04                   |                                        |                            | 1.9                                          | 1.14E-05                   |                                    |                         |
| FDPS                                        | Cholesterol Biosynthesis (8188698); Isoprenoid Biosyn C1 SF                                      | 2.2                            | 8.28E-05                   |                                        |                            | 1.8                                          | 2.52E-03                   | 2.0                                | 3.53E-02                |
| FFAR2                                       | Acetate/Butyrate/Propionate Receptor (12711604, 27966553, 19574715); GPCR SF                     | 3.0                            | 5.18E-04                   | 3.6                                    | 1.18E-05                   |                                              |                            |                                    |                         |
| FFAR4                                       | Fatty Acid Receptor (20813258); GPCR SF                                                          | 2.3                            | 1.81E-02                   |                                        |                            | 2.3                                          | 5.35E-03                   | 2.3                                | 2.68E-02                |
| GPAT3                                       | Triglyceride Biosynthesis (20181984); LPLAT SF                                                   | 2.8                            | 1.40E-04                   |                                        |                            | 2.5                                          | 7.03E-05                   |                                    |                         |
| HDLBP                                       | Cholesterol Metabolism; KH-I SF                                                                  |                                |                            |                                        |                            |                                              |                            | 2.1                                | 1.81E-02                |
| HMGCR                                       | Cholesterol Biosynthesis; MMPL SF; HMG-CoA Reductase SF                                          | 1.9                            | 1.25E-03                   |                                        |                            |                                              |                            | 1.9                                | 1.78E-04                |
| HMGCS1                                      | Cholesterol Metabolism (7913309); HMG CoA Synth C SF                                             | 3.9                            | 7.11E-09                   |                                        |                            |                                              |                            | 2.8                                | 3.97E-07                |
| HS17B7                                      | Cholesterol Biosynthesis; NADB Rossmann SF; SDR SF                                               | 2.7                            | 9.57E-06                   |                                        |                            |                                              |                            | 1.9                                | 1.22E-03                |
| ID1                                         | Cholesterol Metabolism; Nudix Hydrolase SF                                                       | 3.1                            | 3.39E-06                   |                                        |                            |                                              |                            | 2.2                                | 2.17E-04                |
| IFRD1                                       | Lipid Metabolism (16085642); IFRD SF                                                             | 1.8                            | 2.25E-03                   |                                        |                            |                                              |                            |                                    |                         |
| INSIG1                                      | Cholesterol Metabolism (12242342); INSIG SF                                                      | 3.1                            | 6.97E-07                   |                                        |                            | 2.9                                          | 1.64E-08                   |                                    |                         |
| LDLR                                        | Cholesterol Metabolism; LDLa SF; EGF CA SF; LDL Receptor B SF                                    | 2.8                            | 1.77E-06                   |                                        |                            | 2.1                                          | 2.26E-04                   |                                    |                         |
| LIPG                                        | Lipid Metabolism; Lipase SF; PLAT SF                                                             | 4.0                            | 1.77E-03                   |                                        |                            | 2.3                                          | 4.46E-02                   |                                    |                         |
| LIPH                                        | Lipid Metabolism; Lipase SF                                                                      | 2.2                            | 2.78E-04                   |                                        |                            | 1.7                                          | 8.88E-03                   | 2.4                                | 1.88E-04                |
| LPCAT2                                      | Biosynthesis of Phosphatidylcholine (21498505); LPLAT SF; Efh SF                                 |                                |                            | 1.9                                    | 2.33E-03                   |                                              |                            |                                    |                         |
| LRP2                                        | Lipoprotein Metabolism (7642623); LDLa SF; EGF CA SF                                             | 4.3                            | 1.38E-02                   |                                        |                            | 3.6                                          | 1.26E-02                   |                                    |                         |



Supplemental Table S10: Clustered Metabolism Genes (DEGs) - Down-regulated

| Gene                                         | Functional Categorization                                                                  | 52 DPI w worms vs Control Fold | EDGE FDR Adj p value | 52 DPI w/o worms vs Control Fold | EDGE FDR Adj p value | (52 DPI Inf w/o worms vs Worms Fold | EDGE FDR Adj p value | (21 DPI Inf vs Control) Fold | EDGE FDR Adj p value |
|----------------------------------------------|--------------------------------------------------------------------------------------------|--------------------------------|----------------------|----------------------------------|----------------------|-------------------------------------|----------------------|------------------------------|----------------------|
| <b>Amino Acid Metabolism or Transport</b>    |                                                                                            |                                |                      |                                  |                      |                                     |                      |                              |                      |
| ACADSB                                       | BCAA Metabolism (21430231); Leucine Metabolism (21430231); ACAD SF                         | -1.6                           | 1.66E-03             |                                  |                      |                                     |                      |                              |                      |
| AHCYL2                                       | Homocysteine Metabolism; FDH GDH-like SF                                                   | -2.4                           | 5.80E-06             |                                  |                      |                                     |                      |                              |                      |
| AOC1                                         | Arginine Metabolism; Tryptophan Metabolism; Cu Amine Oxid SF                               |                                |                      |                                  |                      | -2.1                                | 5.97E-05             | -1.8                         | 2.15E-02             |
| ASPA                                         | Aspartate Metabolism (9407392); Peptidase M14-like SF                                      | -2.9                           | 4.20E-03             |                                  |                      |                                     |                      | -2.8                         | 1.01E-02             |
| IVD                                          | Branched-chain Amino Acid Metabolism (25287287); ACAD SF                                   | -1.6                           | 2.32E-02             |                                  |                      |                                     |                      |                              |                      |
| PIPOX                                        | Lysine Catabolism (10642506); NAD Binding 8 SF                                             | -4.9                           | 6.45E-03             |                                  |                      |                                     |                      |                              |                      |
| SLC25A34                                     | Isopropylmalate Transporter (18682385); Solute Carrier SF                                  | -7.8                           | 1.41E-09             |                                  |                      | -4.2                                | 1.12E-05             |                              |                      |
| SLC25A38                                     | Glycine Transporter (26821380); Solute Carrier SF                                          | -1.9                           | 4.57E-04             |                                  |                      |                                     |                      |                              |                      |
| SLC38A4                                      | Arginine/Glycine/Histidine/Lysine Transporter (11342143); Solute Carrier SF                | -7.7                           | 3.14E-09             | -2.6                             | 5.46E-04             | -3.0                                | 3.10E-03             |                              |                      |
| SLC43A2                                      | BCAA/Methionine/Phenylalanine Transporter (15653939); Solute Carrier SF                    | -1.8                           | 2.00E-03             | -1.6                             | 2.36E-02             |                                     |                      |                              |                      |
| SLC6A6                                       | Taurine Transporter (8010975); SLC5-6-like SBD SF; Solute Carrier SF                       | -1.6                           | 5.12E-02             |                                  |                      |                                     |                      |                              |                      |
| SLC7A3L2*                                    | Orphan Transporter; Spore Permease SF; Solute Carrier SF                                   | -1.8                           | 4.24E-04             |                                  |                      |                                     |                      |                              |                      |
| SLC7A3L4*                                    | Orphan Transporter; Spore Permease SF; Solute Carrier SF                                   | -2.6                           | 4.44E-03             |                                  |                      | -2.1                                | 4.13E-02             |                              |                      |
| SLC7A3L6*                                    | Orphan Transporter; Spore Permease SF; Solute Carrier SF                                   | -2.8                           | 1.70E-02             |                                  |                      |                                     |                      |                              |                      |
| SLC7A3L7*                                    | Orphan Transporter; Spore Permease SF; Solute Carrier SF                                   | -2.4                           | 3.11E-02             |                                  |                      | -2.3                                | 4.90E-02             | -3.6                         | 4.06E-04             |
| SLC7A3L8*                                    | Orphan Transporter; Spore Permease SF; Solute Carrier SF                                   | -1.7                           | 1.79E-02             |                                  |                      |                                     |                      |                              |                      |
| SLC7A8                                       | Alanine/Phenylalanine Transporter; Solute Carrier SF                                       | -3.1                           | 2.76E-05             |                                  |                      | -2.1                                | 5.64E-03             |                              |                      |
| THNSL2                                       | O-phospho-homoserine Catabolism (17034760); Trp-synth-beta II SF                           |                                |                      | -2.2                             | 2.04E-04             |                                     |                      |                              |                      |
| <b>Carbohydrate Metabolism or Transport</b>  |                                                                                            |                                |                      |                                  |                      |                                     |                      |                              |                      |
| AKR1E2                                       | Fructose Metabolism (9504428); Aldo Ket Red SF                                             | -1.9                           | 3.20E-03             |                                  |                      | -1.8                                | 4.12E-03             |                              |                      |
| ALDOB                                        | Fructose Metabolism; Glycolysis; Aldolase Class I SF                                       | -27.7                          | 2.35E-07             |                                  |                      |                                     |                      | -10.6                        | 8.40E-19             |
| FBP2                                         | Fructose Metabolism (16213487); Gluconeogenesis (18780768); FIG SF                         | -1.6                           | 1.05E-02             |                                  |                      |                                     |                      |                              |                      |
| PKC1                                         | Gluconeogenesis (20124556); PEPCk Hprk SF                                                  | -16.9                          | 1.62E-07             | -3.1                             | 1.86E-02             | -5.4                                | 1.48E-03             |                              |                      |
| PDK2                                         | Gluconeogenesis (12682057); BCDHK Adom3 SF; HATPase C SF                                   | -1.9                           | 1.11E-03             | -1.6                             | 1.50E-02             |                                     |                      |                              |                      |
| PDK4                                         | Gluconeogenesis; BCDHK Adom3 SF; HATPase C SF                                              | -7.7                           | 2.11E-04             | -3.0                             | 3.61E-02             |                                     |                      | -4.6                         | 5.99E-03             |
| PFKFB4                                       | Fructose Metabolism (10095107); Glycolysis; P-loop NTPase SF                               | -2.0                           | 4.11E-05             |                                  |                      |                                     |                      |                              |                      |
| PGM5                                         | Biosynthesis of Glucose-6-phosphate (8586438); Phosphohexomutase SF                        |                                |                      |                                  |                      |                                     |                      | -2.1                         | 8.60E-04             |
| SI                                           | Isomaltose/Sucrose Metabolism (7002920); Trefol SF; GH31 SF                                | -7.9                           | 8.57E-03             |                                  |                      | -6.1                                | 2.79E-02             |                              |                      |
| SLC22A4                                      | Ascorbic Acid/Class I Glucose Transporter Family Member (23177992); Solute Carrier SF      | -1.8                           | 1.06E-03             |                                  |                      |                                     |                      |                              |                      |
| SLC45A3                                      | Glucose Transporter (22521588); Solute Carrier SF                                          |                                |                      |                                  |                      | -1.6                                | 2.17E-02             |                              |                      |
| <b>Lipid Metabolism or Transport</b>         |                                                                                            |                                |                      |                                  |                      |                                     |                      |                              |                      |
| A1CF                                         | Lipid Metabolism (29083408); RNA Recognition Motif (RRM) SF; DSRM SF                       |                                |                      | -1.6                             | 1.73E-02             |                                     |                      |                              |                      |
| ABCA1                                        | Cholesterol Metabolism; Lipid Metabolism; ABC ATPase SF                                    |                                |                      |                                  |                      | -1.7                                | 5.31E-02             | -1.9                         | 5.62E-03             |
| ABCA6                                        | Macrophage Cholesterol Metabolism (11478798); ABC ATPase SF                                | -6.5                           | 3.05E-06             |                                  |                      | -4.4                                | 1.88E-04             | -6.4                         | 3.40E-08             |
| ABCA8                                        | Bile Acid Transporter (12379217); ABC ATPase SF                                            | -4.1                           | 3.01E-03             |                                  |                      | -2.7                                | 4.77E-02             | -6.8                         | 4.42E-10             |
| ABCA9                                        | Macrophage Cholesterol Transport (12150964); ABC ATPase SF                                 | -2.2                           | 2.05E-03             |                                  |                      | -2.7                                | 5.24E-02             | -5.5                         | 3.06E-08             |
| ABCB4                                        | Bile Acid Phospholipid Transport; ABC ATPase SF                                            | -2.7                           | 2.10E-02             |                                  |                      |                                     |                      |                              |                      |
| ABCC6                                        | Cholesterol Transport (25064003); ABC ATPase SF                                            | -2.1                           | 2.65E-05             |                                  |                      |                                     |                      |                              |                      |
| ACAD10                                       | Fatty Acid Oxidation (21237653); ACAD SF                                                   | -1.6                           | 1.02E-02             |                                  |                      |                                     |                      |                              |                      |
| ACADS                                        | Fatty Acid Beta Oxidation; Mitochondrial Lipid Metabolism (18977676); ACAD SF              | -1.7                           | 2.86E-03             |                                  |                      |                                     |                      |                              |                      |
| ACSBG1                                       | Very Long-chain Fatty Acid Oxidation (10954728); Acyl-CoA Synthetase SF (17762044)         | -2.8                           | 4.00E-02             |                                  |                      |                                     |                      |                              |                      |
| ACSL6                                        | Lipid Metabolism; Long-chain ACS Family; AFD Class I SF; Acyl-CoA Synthetase SF (17762044) |                                |                      |                                  |                      |                                     |                      | -3.7                         | 9.52E-03             |
| APOE                                         | Cholesterol Metabolism; Apolipoprotein A1/A4/E SF                                          | -1.7                           | 3.18E-02             |                                  |                      |                                     |                      |                              |                      |
| APOL2                                        | Apol SF                                                                                    | -2.4                           | 1.75E-04             |                                  |                      | -1.7                                | 3.42E-02             |                              |                      |
| BDH1                                         | Fatty Acid Catabolism (8679568); NADB Rossmann SF                                          |                                |                      | -1.7                             | 5.79E-03             | -1.7                                | 7.89E-03             |                              |                      |
| CES1B*                                       | Cholesterol Metabolism; Lipid Metabolism; Carboxylesterase Family                          | -2.1                           | 5.66E-04             | -1.7                             | 7.07E-03             |                                     |                      |                              |                      |
| CYP4V2                                       | Fatty Acid Metabolism (19661213); Cytochrome P450 SF                                       |                                |                      |                                  |                      |                                     |                      | -2.0                         | 1.52E-02             |
| CYP7B1                                       | Bile Acid Synthesis (2492729); Cytochrome p450 SF                                          |                                |                      |                                  |                      | -2.0                                | 1.59E-02             | -1.7                         | 4.83E-02             |
| FAAH                                         | Lipid Metabolism; Amidase SF                                                               | -2.7                           | 6.61E-04             |                                  |                      |                                     |                      |                              |                      |
| FABP1                                        | Lipid Metabolism (17449472); Lipocalin SF                                                  | -3.7                           | 5.00E-05             |                                  |                      | -2.4                                | 1.03E-02             |                              |                      |
| FABP3L2*                                     | Lipocalin SF                                                                               |                                |                      |                                  |                      |                                     |                      | -44.6                        | 1.84E-04             |
| FABP4                                        | Lipid Metabolism (11891416); Lipocalin SF                                                  | -2.7                           | 1.86E-02             |                                  |                      |                                     |                      |                              |                      |
| GHHPBP1                                      | Lipoprotein Metabolism (17997385); LU SF                                                   | -5.3                           | 6.94E-04             | -2.5                             | 3.06E-02             |                                     |                      |                              |                      |
| HADHA                                        | Long Chain Fatty Acid Beta Oxidation (8135828); Crotonase-like SF; AdoMet MTases SF        | -1.7                           | 1.84E-04             | -1.5                             | 1.16E-03             |                                     |                      |                              |                      |
| LIPA                                         | Lipid Metabolism (16131527); Abhydro Lipase SF                                             | -1.5                           | 3.68E-02             |                                  |                      |                                     |                      |                              |                      |
| LIPE                                         | Lipid Metabolism; HSL N SF                                                                 | -1.7                           | 3.48E-02             |                                  |                      |                                     |                      |                              |                      |
| LIPM                                         | Abhydro Lipase SF                                                                          |                                |                      |                                  |                      |                                     |                      | -19.0                        | 2.62E-02             |
| MOGAT2                                       | Triglyceride Biosynthesis (25164810); LPLAT SF                                             | -9.2                           | 1.14E-03             |                                  |                      | -4.9                                | 2.97E-02             | -5.4                         | 8.78E-03             |
| OSBPL10                                      | Cholesterol Metabolism (19554302); H-like SF; Oxysterol BP SF                              | -1.9                           | 6.89E-03             |                                  |                      |                                     |                      |                              |                      |
| PLIN1                                        | Inhibition of Lipolysis (17353653); Penlipin SF                                            | -4.0                           | 3.06E-02             |                                  |                      |                                     |                      | -4.3                         | 4.50E-05             |
| PLTP                                         | Lipoprotein Metabolism; B1 SF                                                              | -1.7                           | 1.75E-02             |                                  |                      |                                     |                      |                              |                      |
| PNPLA2                                       | Lipid Metabolism (18445677); Patatin and cPLA2 SF                                          | -2.4                           | 1.05E-02             |                                  |                      |                                     |                      |                              |                      |
| PNPLA6                                       | Phosphatidylcholine Catabolism (15044461); CAP ED SF; Patatin and cPLA2 SF                 | -1.6                           | 2.08E-02             | -1.6                             | 1.01E-02             | -1.5                                | 3.42E-02             |                              |                      |
| PNPLA7                                       | Lysophospholipase (18086666); CAP ED SF; Patatin and cPLA2 SF                              | -1.6                           | 4.92E-03             |                                  |                      | -1.6                                | 6.03E-03             |                              |                      |
| PON1                                         | Lipid Metabolism (19550323); Str Synth SF                                                  |                                |                      | -4.5                             | 4.13E-02             |                                     |                      |                              |                      |
| PPAP2B                                       | Sphingosine-1-phosphate (S1P) Metabolism (12471011); PAP2-like SF                          |                                |                      |                                  |                      |                                     |                      | -1.8                         | 1.44E-02             |
| SCARB2                                       | Cholesterol Metabolism (14570588); SRCR SF                                                 | -1.6                           | 1.71E-03             |                                  |                      | -1.6                                | 5.21E-04             |                              |                      |
| SCARF1                                       | Lipid Metabolism (15145948); EGF Lam SF                                                    | -1.5                           | 4.78E-02             |                                  |                      |                                     |                      |                              |                      |
| SLC10A2                                      | Bile Acid Transporter; Lipid Metabolism; Solute Carrier SF                                 | -1285.8                        | 8.30E-08             | -4.3                             | 4.13E-02             | -297.1                              | 1.18E-04             |                              |                      |
| SLC16A1                                      | Short-chain Fatty Acid Transporter; Solute Carrier SF                                      | -5.7                           | 0.00E+00             |                                  |                      | -4.4                                | 0.00E+00             | -2.2                         | 1.59E-03             |
| SLC25A20                                     | Carbonyl Transporter; Fatty Acid Metabolism; Solute Carrier SF                             | -2.1                           | 1.13E-04             |                                  |                      |                                     |                      |                              |                      |
| SLC25A29                                     | Mitochondrial Carnitine Transporter (12882971, 19287344); Solute Carrier SF                | -1.9                           | 1.01E-02             |                                  |                      |                                     |                      |                              |                      |
| SLC25A42                                     | Coenzyme A Transporter (19429682); Solute Carrier SF                                       |                                |                      |                                  |                      | -2.1                                | 7.36E-03             |                              |                      |
| SLC27A1                                      | Fatty Acid Transporter; Lipid Metabolism; Solute Carrier SF                                | -1.7                           | 3.17E-02             |                                  |                      |                                     |                      |                              |                      |
| TM6SF2                                       | Lipid Metabolism (24927523); DUF2781 SF                                                    | -6.3                           | 2.26E-14             |                                  |                      | -4.0                                | 1.95E-09             |                              |                      |
| <b>Mineral Metabolism or Transport</b>       |                                                                                            |                                |                      |                                  |                      |                                     |                      |                              |                      |
| ABCG2                                        | Heme Transport (16487711); ABC ATPase SF                                                   | -7.6                           | 6.40E-07             |                                  |                      | -3.4                                | 2.49E-03             | -3.5                         | 9.73E-07             |
| CLCA4                                        | Chloride Ion Transport; CLCA N SF; vWFA SF                                                 | -27.9                          | 1.34E-07             |                                  |                      |                                     |                      |                              |                      |
| FTL                                          | Iron Storage; Ferritin-like SF                                                             | -1.6                           | 4.64E-02             |                                  |                      |                                     |                      |                              |                      |
| PHEX                                         | Phosphate Metabolism (22339660); Glu/Zincin SF                                             |                                |                      |                                  |                      |                                     |                      | -6.8                         | 1.81E-02             |
| SCARA5                                       | Ferritin Receptor (19154717); Iron Metabolism (19154717); SRCR SF                          | -2.4                           | 2.08E-02             |                                  |                      |                                     |                      |                              |                      |
| SELENBP1                                     | Selenium Containing Protein; BP56 SF                                                       | -4.4                           | 1.11E-11             |                                  |                      | -3.0                                | 1.73E-07             |                              |                      |
| SELENOP                                      | Selenoprotein (12423375); Selenoprotein P SF                                               | -3.3                           | 2.97E-08             |                                  |                      | -2.3                                | 5.83E-05             |                              |                      |
| SLC25A3                                      | Mitochondrial Phosphate Transporter (23266187); Solute Carrier SF                          |                                |                      |                                  |                      |                                     |                      | -1.9                         | 2.19E-02             |
| SLC26A3                                      | Chloride Ion Transport (16715296); Solute Carrier SF                                       | -12.7                          | 8.30E-08             |                                  |                      | -12.0                               | 9.62E-08             | -2.5                         | 8.05E-03             |
| SLC30A10                                     | Mg Transporter (22341972); Zn Transporter (22706290); Solute Carrier SF                    | -10.2                          | 3.00E-03             |                                  |                      | -6.3                                | 2.38E-02             | -9.4                         | 2.71E-13             |
| SLC30A3                                      | Zn Transporter; Solute Carrier SF                                                          | -3.1                           | 8.38E-03             |                                  |                      |                                     |                      |                              |                      |
| SLC31A2                                      | Copper Transporter (9207117); Solute Carrier SF                                            | -1.8                           | 2.06E-02             |                                  |                      |                                     |                      |                              |                      |
| SLC39A5                                      | Zn Transporter (15322118); Solute Carrier SF                                               | -2.3                           | 3.63E-02             |                                  |                      |                                     |                      |                              |                      |
| SLC8A1                                       | Intestinal Calcium Transport (26109800); Solute Carrier SF                                 |                                |                      |                                  |                      | -1.6                                | 5.29E-02             | -2.1                         | 2.28E-03             |
| <b>Vitamin Metabolism or Transport</b>       |                                                                                            |                                |                      |                                  |                      |                                     |                      |                              |                      |
| ALDH1A3                                      | Retinoic Acid Synthesis; Vitamin A Metabolism; ALDH-SF SF                                  |                                |                      |                                  |                      | -2.0                                | 1.10E-02             |                              |                      |
| CYP26B1                                      | Retinoic Acid Catabolism; Vitamin A Metabolism; Cytochrome P450 SF                         | -5.0                           | 2.61E-08             |                                  |                      | -4.6                                | 4.16E-08             | -4.8                         | 9.76E-03             |
| CYP27A1                                      | Vitamin D Metabolism (15353333); Cytochrome P450 SF                                        | -1.8                           | 3.99E-02             |                                  |                      |                                     |                      |                              |                      |
| MTHFR                                        | Folic Acid Metabolism; MTHFR SF                                                            | -1.8                           | 7.98E-03             |                                  |                      |                                     |                      |                              |                      |
| NADK                                         | NADPH Metabolism (17855339); nadF SF                                                       |                                |                      |                                  |                      | -1.6                                | 4.96E-03             |                              |                      |
| RBP5                                         | Vitamin A Metabolism (11274389); Lipocalin SF                                              | -2.4                           | 5.79E-03             |                                  |                      |                                     |                      |                              |                      |
| RDH10                                        | Retinol Dehydrogenase; Vitamin A Metabolism; NADB Rossmann SF; SDR SF                      |                                |                      |                                  |                      |                                     |                      | -2.0                         | 2.25E-02             |
| RDH16                                        | Retinol Dehydrogenase; Vitamin A Metabolism; NADB Rossmann SF; SDR SF                      | -6.1                           | 3.20E-03             | -2.8                             | 4.89E-02             |                                     |                      |                              |                      |
| RETSAT                                       | Vitamin A Metabolism (15358783); NADB Rossmann SF; COG1233 SF                              | -2.2                           | 4.10E-06             |                                  |                      | -1.6                                | 7.89E-03             |                              |                      |
| SDR9C7                                       | Putative Retinol Dehydrogenase (19703561); NADB Rossmann SF; SDR SF                        | -9.3                           | 8.99E-03             | -4.2                             | 2.26E-02             |                                     |                      |                              |                      |
| SLC26A32                                     | Folate Transporter (10978331); Solute Carrier SF                                           |                                |                      |                                  |                      |                                     |                      |                              |                      |
| TCN2                                         | Vitamin B12 Transporter; Cobalamin Bind SF; DUF4430 SF                                     | -1.5                           | 3.88E-02             |                                  |                      |                                     |                      |                              |                      |
| VDR                                          | Vitamin D3 Signaling; Transcription Factor; NR-DBD SF                                      | -1.7                           | 7.90E-03             |                                  |                      |                                     |                      |                              |                      |
| <b>Miscellaneous Metabolism or Transport</b> |                                                                                            |                                |                      |                                  |                      |                                     |                      |                              |                      |
| ABCB1                                        | ATP-dependent Xenobiotic Efflux; ABC Membrane SF; P-loop NTPase SF                         |                                |                      |                                  |                      | -2.0                                | 7.10E-03             |                              |                      |
| ABCB6                                        | Coproporphyrinogen III Transporter (23792964); ABC Membrane SF                             |                                |                      |                                  |                      | -1.6                                | 5.08E-03             |                              |                      |
| ABCC4L2*                                     | Orphan Transporter; ABC Membrane SF; P-loop NTPase SF                                      |                                |                      |                                  |                      |                                     |                      | -3.4                         | 2.05E-10             |







Supplemental Table S12. Metabolic markers of *Trichuris suis* infection colonized 33 cp31

| Seq. ID | Super Pathway                            | Sub Pathway   | Biochemical Name | Platform | KEGG          | HMDB    | Fold of Change |              | Statistical Values |         | Mean Values  |          | % Filled Values |                                          | Super Pathway                            | Sub Pathway    | PubMed    | CAS   | Ref   | Date |
|---------|------------------------------------------|---------------|------------------|----------|---------------|---------|----------------|--------------|--------------------|---------|--------------|----------|-----------------|------------------------------------------|------------------------------------------|----------------|-----------|-------|-------|------|
|         |                                          |               |                  |          |               |         | Infected       | Non-Infected | p-Value            | t-Value | Non-Infected | Infected | Non-Infected    | Infected                                 |                                          |                |           |       |       |      |
|         |                                          |               |                  |          |               |         | Infected       | Non-Infected |                    |         |              |          |                 |                                          |                                          |                |           |       |       |      |
| 1       | Glycine, serine and threonine metabolism | Alanine       | Alanine          | GCMS     | 11777         | Alanine | 1.00           | 0.0000       | 0.0000             | 0.0000  | 2.0491       | 100      | 100             | Alanine acid                             | Glycine, serine and threonine metabolism | 520712720      | 56-60-6   | 1865  | 10/13 |      |
| 2       |                                          | Alanine       | GCMS             | 11778    | Alanine       | 1.00    | 0.0000         | 0.0000       | 0.0000             | 2.0491  | 100          | 100      | Alanine acid    | Glycine, serine and threonine metabolism | 520712720                                | 56-60-6        | 1865      | 10/13 |       |      |
| 3       |                                          | Alanine       | GCMS             | 27710    | Alanine       | 1.00    | 0.0000         | 0.0000       | 0.0000             | 2.0491  | 100          | 100      | Alanine acid    | Glycine, serine and threonine metabolism | 18072                                    | 543-24-4       | 735       | 11/61 |       |      |
| 4       |                                          | Alanine       | GCMS             | 1549     | Alanine       | 1.00    | 0.0000         | 0.0000       | 0.0000             | 2.0491  | 100          | 100      | Alanine acid    | Glycine, serine and threonine metabolism | 591105785                                | 56-61-1        | 1281      | 2/04  |       |      |
| 13      |                                          | Alanine       | GCMS             | 1548     | Alanine       | 1.00    | 0.0000         | 0.0000       | 0.0000             | 2.0491  | 100          | 100      | Alanine acid    | Glycine, serine and threonine metabolism | 591105785                                | 56-61-1        | 1281      | 2/04  |       |      |
| 17      |                                          | Alanine       | GCMS             | 07717    | Alanine       | 1.00    | 0.0000         | 0.0000       | 0.0000             | 2.0491  | 100          | 100      | Alanine acid    | Glycine, serine and threonine metabolism | 687101628                                | 71-19-5        | 173       | 10/11 |       |      |
| 18      |                                          | Alanine       | GCMS             | 20339    | Alanine       | 1.00    | 0.0000         | 0.0000       | 0.0000             | 2.0491  | 100          | 100      | Alanine acid    | Glycine, serine and threonine metabolism | 4601717                                  | 1703-74-2      | 246       | 10/11 |       |      |
| 24      |                                          | Alanine       | GCMS             | 0286     | Alanine       | 1.00    | 0.0000         | 0.0000       | 0.0000             | 2.0491  | 100          | 100      | Alanine acid    | Glycine, serine and threonine metabolism | 591105785                                | 56-61-1        | 1281      | 2/04  |       |      |
| 28      |                                          | Alanine       | GCMS             | 25       | Alanine       | 1.00    | 0.0000         | 0.0000       | 0.0000             | 2.0491  | 100          | 100      | Alanine acid    | Glycine, serine and threonine metabolism | 22814907                                 | 56-417-027-9-6 | 1451      | 1/14  |       |      |
| 32      |                                          | Alanine       | GCMS             | 1136     | Alanine       | 1.00    | 0.0000         | 0.0000       | 0.0000             | 2.0491  | 100          | 100      | Alanine acid    | Glycine, serine and threonine metabolism | 590121124                                | 56-41-7        | 1147      | 11/13 |       |      |
| 35      | Alanine and aspartate metabolism         | Aspartate     | GCMS             | 2285     | Aspartate     | 1.01    | 0.0000         | 0.0000       | 0.0000             | 1.0000  | 1.0000       | 100      | 100             | Aspartic acid                            | Alanine and aspartate metabolism         | 590121124      | 56-41-7   | 1147  | 11/13 |      |
| 36      |                                          | Aspartate     | GCMS             | 1835     | Aspartate     | 1.00    | 0.0000         | 0.0000       | 0.0000             | 1.0000  | 1.0000       | 100      | 100             | Aspartic acid                            | Alanine and aspartate metabolism         | 1087           | 499-83-2  | 1261  | 2/04  |      |
| 38      |                                          | Aspartate     | GCMS             | 1835     | Aspartate     | 1.00    | 0.0000         | 0.0000       | 0.0000             | 1.0000  | 1.0000       | 100      | 100             | Aspartic acid                            | Alanine and aspartate metabolism         | 1087           | 499-83-2  | 1261  | 2/04  |      |
| 39      |                                          | Aspartate     | GCMS             | 27       | Aspartate     | 1.00    | 0.0000         | 0.0000       | 0.0000             | 1.0000  | 1.0000       | 100      | 100             | Aspartic acid                            | Alanine and aspartate metabolism         | 611            | 56-40-0   | 700   | 1/61  |      |
| 40      |                                          | Aspartate     | GCMS             | 25       | Aspartate     | 1.00    | 0.0000         | 0.0000       | 0.0000             | 1.0000  | 1.0000       | 100      | 100             | Aspartic acid                            | Alanine and aspartate metabolism         | 590121124      | 56-41-7   | 1147  | 11/13 |      |
| 47      |                                          | Aspartate     | GCMS             | 1416     | Aspartate     | 1.00    | 0.0000         | 0.0000       | 0.0000             | 1.0000  | 1.0000       | 100      | 100             | Aspartic acid                            | Alanine and aspartate metabolism         | 688208110      | 56-12-2   | 1037  | 3/04  |      |
| 48      |                                          | Aspartate     | GCMS             | 4007     | Aspartate     | 1.00    | 0.0000         | 0.0000       | 0.0000             | 1.0000  | 1.0000       | 100      | 100             | Aspartic acid                            | Alanine and aspartate metabolism         | 2072           | 4386-02-0 | 810   | 11/12 |      |
| 50      |                                          | Aspartate     | GCMS             | 19700    | Aspartate     | 1.00    | 0.0000         | 0.0000       | 0.0000             | 1.0000  | 1.0000       | 100      | 100             | Aspartic acid                            | Alanine and aspartate metabolism         | 150909         | 3817-68-0 | 1492  | 10/11 |      |
| 53      |                                          | Aspartate     | GCMS             | 37424    | Aspartate     | 1.00    | 0.0000         | 0.0000       | 0.0000             | 1.0000  | 1.0000       | 100      | 100             | Aspartic acid                            | Alanine and aspartate metabolism         | 773305145      | 5041-29-2 | 1807  | 2/04  |      |
| 54      |                                          | Aspartate     | GCMS             | 2094     | Aspartate     | 1.00    | 0.0000         | 0.0000       | 0.0000             | 1.0000  | 1.0000       | 100      | 100             | Aspartic acid                            | Alanine and aspartate metabolism         | 774            | 3914-52-3 | 193   | 10/12 |      |
| 55      | Glutamate metabolism                     | Glutamate     | GCMS             | 907      | Glutamate     | 1.00    | 0.0000         | 0.0000       | 0.0000             | 1.0000  | 1.0000       | 100      | 100             | Glutamic acid                            | Glutamate metabolism                     | 72875          | 104-83-8  | 1118  | 10/11 |      |
| 56      |                                          | Glutamate     | GCMS             | 1074     | Glutamate     | 1.00    | 0.0000         | 0.0000       | 0.0000             | 1.0000  | 1.0000       | 100      | 100             | Glutamic acid                            | Glutamate metabolism                     | 774            | 3914-52-3 | 193   | 10/12 |      |
| 64      |                                          | Glutamate     | GCMS             | 2030     | Glutamate     | 1.00    | 0.0000         | 0.0000       | 0.0000             | 1.0000  | 1.0000       | 100      | 100             | Glutamic acid                            | Glutamate metabolism                     | 611            | 56-40-0   | 700   | 1/61  |      |
| 65      |                                          | Glutamate     | GCMS             | 19700    | Glutamate     | 1.00    | 0.0000         | 0.0000       | 0.0000             | 1.0000  | 1.0000       | 100      | 100             | Glutamic acid                            | Glutamate metabolism                     | 150909         | 3817-68-0 | 1492  | 10/11 |      |
| 68      |                                          | Glutamate     | GCMS             | 1938     | Glutamate     | 1.00    | 0.0000         | 0.0000       | 0.0000             | 1.0000  | 1.0000       | 100      | 100             | Glutamic acid                            | Glutamate metabolism                     | 774            | 3914-52-3 | 193   | 10/12 |      |
| 69      |                                          | Glutamate     | GCMS             | 1074     | Glutamate     | 1.00    | 0.0000         | 0.0000       | 0.0000             | 1.0000  | 1.0000       | 100      | 100             | Glutamic acid                            | Glutamate metabolism                     | 774            | 3914-52-3 | 193   | 10/12 |      |
| 74      |                                          | Glutamate     | GCMS             | 1938     | Glutamate     | 1.00    | 0.0000         | 0.0000       | 0.0000             | 1.0000  | 1.0000       | 100      | 100             | Glutamic acid                            | Glutamate metabolism                     | 774            | 3914-52-3 | 193   | 10/12 |      |
| 75      |                                          | Glutamate     | GCMS             | 1938     | Glutamate     | 1.00    | 0.0000         | 0.0000       | 0.0000             | 1.0000  | 1.0000       | 100      | 100             | Glutamic acid                            | Glutamate metabolism                     | 774            | 3914-52-3 | 193   | 10/12 |      |
| 76      |                                          | Glutamate     | GCMS             | 1938     | Glutamate     | 1.00    | 0.0000         | 0.0000       | 0.0000             | 1.0000  | 1.0000       | 100      | 100             | Glutamic acid                            | Glutamate metabolism                     | 774            | 3914-52-3 | 193   | 10/12 |      |
| 77      |                                          | Glutamate     | GCMS             | 1938     | Glutamate     | 1.00    | 0.0000         | 0.0000       | 0.0000             | 1.0000  | 1.0000       | 100      | 100             | Glutamic acid                            | Glutamate metabolism                     | 774            | 3914-52-3 | 193   | 10/12 |      |
| 78      | Lysine metabolism                        | Lysine        | GCMS             | 1301     | Lysine        | 1.00    | 0.0000         | 0.0000       | 0.0000             | 1.0000  | 1.0000       | 100      | 100             | Lysine                                   | Lysine metabolism                        | 1087           | 499-83-2  | 1261  | 2/04  |      |
| 81      |                                          | Lysine        | GCMS             | 1301     | Lysine        | 1.00    | 0.0000         | 0.0000       | 0.0000             | 1.0000  | 1.0000       | 100      | 100             | Lysine                                   | Lysine metabolism                        | 1087           | 499-83-2  | 1261  | 2/04  |      |
| 82      |                                          | Lysine        | GCMS             | 1301     | Lysine        | 1.00    | 0.0000         | 0.0000       | 0.0000             | 1.0000  | 1.0000       | 100      | 100             | Lysine                                   | Lysine metabolism                        | 1087           | 499-83-2  | 1261  | 2/04  |      |
| 83      |                                          | Lysine        | GCMS             | 1301     | Lysine        | 1.00    | 0.0000         | 0.0000       | 0.0000             | 1.0000  | 1.0000       | 100      | 100             | Lysine                                   | Lysine metabolism                        | 1087           | 499-83-2  | 1261  | 2/04  |      |
| 84      |                                          | Lysine        | GCMS             | 1301     | Lysine        | 1.00    | 0.0000         | 0.0000       | 0.0000             | 1.0000  | 1.0000       | 100      | 100             | Lysine                                   | Lysine metabolism                        | 1087           | 499-83-2  | 1261  | 2/04  |      |
| 85      |                                          | Lysine        | GCMS             | 1301     | Lysine        | 1.00    | 0.0000         | 0.0000       | 0.0000             | 1.0000  | 1.0000       | 100      | 100             | Lysine                                   | Lysine metabolism                        | 1087           | 499-83-2  | 1261  | 2/04  |      |
| 86      |                                          | Lysine        | GCMS             | 1301     | Lysine        | 1.00    | 0.0000         | 0.0000       | 0.0000             | 1.0000  | 1.0000       | 100      | 100             | Lysine                                   | Lysine metabolism                        | 1087           | 499-83-2  | 1261  | 2/04  |      |
| 87      |                                          | Lysine        | GCMS             | 1301     | Lysine        | 1.00    | 0.0000         | 0.0000       | 0.0000             | 1.0000  | 1.0000       | 100      | 100             | Lysine                                   | Lysine metabolism                        | 1087           | 499-83-2  | 1261  | 2/04  |      |
| 88      |                                          | Lysine        | GCMS             | 1301     | Lysine        | 1.00    | 0.0000         | 0.0000       | 0.0000             | 1.0000  | 1.0000       | 100      | 100             | Lysine                                   | Lysine metabolism                        | 1087           | 499-83-2  | 1261  | 2/04  |      |
| 89      |                                          | Lysine        | GCMS             | 1301     | Lysine        | 1.00    | 0.0000         | 0.0000       | 0.0000             | 1.0000  | 1.0000       | 100      | 100             | Lysine                                   | Lysine metabolism                        | 1087           | 499-83-2  | 1261  | 2/04  |      |
| 90      | Phenylalanine & tyrosine metabolism      | Phenylalanine | GCMS             | 3140     | Phenylalanine | 1.00    | 0.0000         | 0.0000       | 0.0000             | 1.0000  | 1.0000       | 100      | 100             | Phenylalanine                            | Phenylalanine & tyrosine metabolism      | 520656140      | 100-95-1  | 1279  | 10/11 |      |
| 91      |                                          | Phenylalanine | GCMS             | 3140     | Phenylalanine | 1.00    | 0.0000         | 0.0000       | 0.0000             | 1.0000  | 1.0000       | 100      | 100             | Phenylalanine                            | Phenylalanine & tyrosine metabolism      | 520656140      | 100-95-1  | 1279  | 10/11 |      |
| 92      |                                          | Phenylalanine | GCMS             | 3140     | Phenylalanine | 1.00    | 0.0000         | 0.0000       | 0.0000             | 1.0000  | 1.0000       | 100      | 100             | Phenylalanine                            | Phenylalanine & tyrosine metabolism      | 520656140      | 100-95-1  | 1279  | 10/11 |      |
| 93      |                                          | Phenylalanine | GCMS             | 3140     | Phenylalanine | 1.00    | 0.0000         | 0.0000       | 0.0000             | 1.0000  | 1.0000       | 100      | 100             | Phenylalanine                            | Phenylalanine & tyrosine metabolism      | 520656140      | 100-95-1  | 1279  | 10/11 |      |
| 94      |                                          | Phenylalanine | GCMS             | 3140     | Phenylalanine | 1.00    | 0.0000         | 0.0000       | 0.0000             | 1.0000  | 1.0000       | 100      | 100             | Phenylalanine                            | Phenylalanine & tyrosine metabolism      | 520656140      | 100-95-1  | 1279  | 10/11 |      |
| 95      |                                          | Phenylalanine | GCMS             | 3140     | Phenylalanine | 1.00    | 0.0000         | 0.0000       | 0.0000             | 1.0000  | 1.0000       | 100      | 100             | Phenylalanine                            | Phenylalanine & tyrosine metabolism      | 520656140      | 100-95-1  | 1279  | 10/11 |      |
| 96      |                                          | Phenylalanine | GCMS             | 3140     | Phenylalanine | 1.00    | 0.0000         | 0.0000       | 0.0000             | 1.0000  | 1.0000       | 100      | 100             | Phenylalanine                            | Phenylalanine & tyrosine metabolism      | 520656140      | 100-95-1  | 1279  | 10/11 |      |
| 97      |                                          | Phenylalanine | GCMS             | 3140     | Phenylalanine | 1.00    | 0.0000         | 0.0000       | 0.0000             | 1.0000  | 1.0000       | 100      | 100             | Phenylalanine                            | Phenylalanine & tyrosine metabolism      | 520656140      | 100-95-1  | 1279  | 10/11 |      |
| 98      |                                          | Phenylalanine | GCMS             | 3140     | Phenylalanine | 1.00    | 0.0000         | 0.0000       | 0.0000             | 1.0000  | 1.0000       | 100      | 100             | Phenylalanine                            | Phenylalanine & tyrosine metabolism      | 520656140      | 100-95-1  | 1279  | 10/11 |      |
| 99      |                                          | Phenylalanine | GCMS             | 3140     | Phenylalanine | 1.00    | 0.0000         | 0.0000       | 0.0000             | 1.0000  | 1.0000       | 100      | 100             | Phenylalanine                            | Phenylalanine & tyrosine metabolism      | 520656140      | 100-95-1  | 1279  | 10/11 |      |
| 100     | Amino acid                               | Tyrosine      | GCMS             | 3203     | Tyrosine      | 1.00    | 0.0000         | 0.0000       | 0.0000             | 1.0000  | 1.0000       | 100      | 100             | Tyrosine                                 | Tyrosine metabolism                      | 687101628      | 105-17-3  | 1158  | 10/11 |      |
| 101     |                                          | Tyrosine      | GCMS             | 3203     | Tyrosine      | 1.00    | 0.0000         | 0.0000       | 0.0000             | 1.0000  | 1.0000       | 100      | 100             | Tyrosine                                 | Tyrosine metabolism                      | 687101628      | 105-17-3  | 1158  | 10/11 |      |
| 102     |                                          | Tyrosine      | GCMS             | 3203     | Tyrosine      | 1.00    | 0.0000         | 0.0000       | 0.0000             | 1.0000  | 1.0000       | 100      | 100             | Tyrosine                                 | Tyrosine metabolism                      | 687101628      | 105-17-3  | 1158  | 10/11 |      |
| 103     |                                          | Tyrosine      | GCMS             | 3203     | Tyrosine      | 1.00    | 0.0000         | 0.0000       | 0.0000             | 1.0000  | 1.0000       | 100      | 100             | Tyrosine                                 | Tyrosine metabolism                      | 687101628      | 105-17-3  | 1158  | 10/11 |      |
| 104     |                                          | Tyrosine      | GCMS             | 3203     | Tyrosine      | 1.00    | 0.0000         | 0.0000       | 0.0000             | 1.0000  | 1.0000       | 100      | 100             | Tyrosine                                 | Tyrosine metabolism                      | 687101628      | 105-17-3  | 1158  | 10/11 |      |
| 105     |                                          | Tyrosine      | GCMS             | 3203     | Tyrosine      | 1.00    | 0.0000         | 0.0000       | 0.0000             | 1.0000  | 1.0000       | 100      | 100             | Tyrosine                                 | Tyrosine metabolism                      | 687101628      | 105-17-3  | 1158  | 10/11 |      |
| 106     |                                          | Tyrosine      | GCMS             | 3203     | Tyrosine      | 1.00    | 0.0000         | 0.0000       | 0.0000             | 1.0000  | 1.0000       | 100      | 100             | Tyrosine                                 | Tyrosine metabolism                      | 687101628      | 105-17-3  | 1158  | 10/11 |      |
| 107     |                                          | Tyrosine      | GCMS             | 3203     | Tyrosine      | 1.00    | 0              |              |                    |         |              |          |                 |                                          |                                          |                |           |       |       |      |
