# Supplementary material for: Molecular and metabolomic changes in the proximal colon of pigs infected with Trichuris suis
Source: PubMed Central journal article supplement (PMC7393168; doi:10.1038/s41598-020-69462-5), 2020-07-30
Supplement: 41598_2020_69462_MOESM3_ESM.pdf [file 41598_2020_69462_MOESM3_ESM.pdf]

**Molecular and metabolomic changes in the proximal colon of pigs infected with *Trichuris suis***

Harry Dawson<sup>1</sup>, Celine Chen<sup>1</sup>, Robert Li<sup>2</sup>, Lauren Nicki Bell<sup>3</sup>, Terez Shea-Donohue<sup>4</sup>, Helene Kringel<sup>5</sup>, Ethiopia Beshah<sup>1</sup>, Dolores E. Hill<sup>2</sup>, Joseph F. Urban Jr<sup>1,2</sup>.

<sup>1</sup>United States Department of Agriculture, Agricultural Research Service, Northeast Area, Beltsville Human Nutrition Research Center, Diet Genomics and Immunology Laboratory, <sup>2</sup> Beltsville Agricultural Research Center, Animal Parasitology Disease Laboratory, Beltsville, MD; <sup>3</sup>Metabolon, Inc., Morrisville, NC; <sup>4</sup>University of Maryland School of Medicine, Baltimore, MD, USA; <sup>5</sup>Department of Veterinary Disease Biology, Faculty of Health and Medical Sciences, University of Copenhagen, Copenhagen, Denmark

Supplemental Table S3

**Supplemental Table S3. DEGs in the proximal colon of infected over control pigs at 21 days after inoculation.**

| Feature ID | Fold change | EDGE test: FDR p-value correction |
|------------|-------------|-----------------------------------|
| PLA2G2A    | -1633.2     | 1.33E-05                          |
| OLIG2      | -143.0      | 1.09E-03                          |
| ZFP42      | -89.1       | 3.67E-11                          |
| DNAH14     | -60.4       | 1.56E-02                          |
| COL22A1    | -56.8       | 1.34E-02                          |
| ADAM1A     | -52.9       | 1.87E-02                          |
| ASTL       | -49.0       | 2.75E-02                          |
| FABP3L2*   | -44.6       | 1.84E-04                          |
| ABCC4L3    | -23.7       | 8.32E-19                          |
| LIPM       | -19.0       | 2.62E-02                          |
| ZSCAN9     | -18.9       | 4.68E-02                          |
| CD40       | -17.7       | 4.10E-02                          |
| MIR1279    | -16.9       | 4.50E-05                          |
| SLC22A10L3 | -14.0       | 1.75E-03                          |
| HOXC9      | -12.3       | 5.27E-03                          |
| ABCC4L4    | -12.2       | 7.35E-07                          |
| FCER2      | -12.0       | 1.34E-02                          |
| AGTR2      | -11.5       | 3.94E-03                          |
| ALDOB      | -10.6       | 8.40E-19                          |
| CCL3L2     | -10.6       | 5.90E-03                          |
| MIR1244-1  | -9.7        | 6.08E-03                          |
| SLC30A10   | -9.4        | 2.71E-13                          |
| OAZ3       | -8.8        | 2.23E-02                          |
| SLC14A1    | -7.9        | 9.93E-11                          |
| TRPV6      | -7.7        | 1.24E-06                          |
| HMGCS2     | -7.2        | 0.00E+00                          |
| CD200R1L   | -6.9        | 7.81E-03                          |
| ABCA8      | -6.8        | 4.42E-10                          |
| PHEX       | -6.8        | 1.81E-02                          |
| ABCA6      | -6.4        | 3.40E-08                          |
| CXCL9      | -6.1        | 7.08E-08                          |
| CCR9       | -5.8        | 1.14E-02                          |
| CXCL13     | -5.8        | 5.77E-08                          |
| COL6A6     | -5.7        | 3.51E-08                          |
| COL25A1    | -5.6        | 7.28E-04                          |
| AGT        | -5.6        | 1.62E-05                          |
| S100G      | -5.6        | 3.09E-05                          |
| CCL3L1     | -5.6        | 2.84E-03                          |
| ABCA9      | -5.5        | 3.06E-08                          |
| MOGAT2     | -5.4        | 8.78E-03                          |
| AICDA      | -5.3        | 8.16E-04                          |
| CR2        | -5.2        | 3.00E-14                          |
| FCRL1      | -5.0        | 1.34E-02                          |
| SLC24A4    | -4.9        | 8.53E-03                          |
| CYP26B1    | -4.8        | 9.76E-03                          |

|           |      |          |
|-----------|------|----------|
| MUSK      | -4.8 | 5.12E-05 |
| ZNF354B   | -4.7 | 1.05E-02 |
| PDK4      | -4.6 | 5.99E-03 |
| PLIN1     | -4.3 | 4.50E-05 |
| CD5L      | -4.2 | 2.41E-02 |
| GPR174    | -4.1 | 4.81E-08 |
| HAS3      | -4.0 | 4.07E-05 |
| TNFSF11   | -4.0 | 1.83E-03 |
| CYP1B1    | -3.9 | 2.93E-04 |
| IDO1      | -3.8 | 6.52E-05 |
| FCRLA     | -3.8 | 3.49E-02 |
| NR1H4     | -3.7 | 1.44E-02 |
| SLC7A3L7* | -3.6 | 4.06E-04 |
| CLEC17A   | -3.6 | 4.30E-03 |
| ABCG2     | -3.5 | 9.73E-07 |
| SLC25A53  | -3.5 | 2.19E-02 |
| NXPE2     | -3.4 | 2.01E-03 |
| KLRK1     | -3.4 | 6.23E-09 |
| ABCC4L2   | -3.4 | 2.05E-10 |
| MAMDC2    | -3.4 | 3.09E-05 |
| GHR       | -3.4 | 2.10E-05 |
| ART3      | -3.3 | 3.07E-02 |
| PNLIPRP2  | -3.3 | 7.77E-06 |
| ADORA3    | -3.3 | 5.03E-03 |
| GCNT4     | -3.3 | 6.50E-03 |
| AQP8      | -3.3 | 3.30E-04 |
| XCL1      | -3.3 | 3.63E-03 |
| AGTR1     | -3.2 | 6.35E-04 |
| ABCA13    | -3.2 | 3.49E-02 |
| PF4       | -3.2 | 1.71E-02 |
| CD28      | -3.2 | 1.08E-02 |
| CLCA4     | -3.1 | 1.16E-02 |
| FBXO32    | -3.1 | 9.94E-05 |
| ABI3BP    | -3.0 | 8.43E-06 |
| DDIT4L    | -3.0 | 2.84E-04 |
| EDIL3     | -3.0 | 3.93E-07 |
| CR1       | -3.0 | 1.86E-02 |
| CHRM2     | -3.0 | 7.15E-03 |
| LY9L1*    | -3.0 | 1.09E-02 |
| SNORA32   | -3.0 | 1.95E-02 |
| KLF12     | -2.9 | 1.06E-03 |
| CHP2      | -2.9 | 1.12E-05 |
| PAX5      | -2.8 | 2.30E-02 |
| RPL11L    | -2.8 | 7.05E-03 |
| CCL8      | -2.8 | 4.24E-02 |
| ASPA      | -2.8 | 1.01E-02 |
| NGLY1     | -2.8 | 4.52E-07 |

|          |      |          |
|----------|------|----------|
| HDAC9    | -2.7 | 7.28E-04 |
| IL15     | -2.7 | 3.09E-02 |
| AR       | -2.7 | 4.53E-02 |
| ADAMTS19 | -2.6 | 1.33E-02 |
| LIFR     | -2.6 | 3.03E-05 |
| RHOH     | -2.6 | 2.84E-03 |
| HOXD10   | -2.6 | 1.85E-02 |
| NEGR1    | -2.6 | 9.36E-03 |
| ADGRE4   | -2.6 | 1.56E-03 |
| CTBS     | -2.5 | 3.96E-02 |
| CELF2    | -2.5 | 4.04E-06 |
| CD1D     | -2.5 | 2.89E-03 |
| GPNMB    | -2.5 | 3.04E-05 |
| BMP3     | -2.5 | 2.94E-03 |
| SLC26A3  | -2.5 | 8.05E-03 |
| PADI2    | -2.5 | 1.60E-04 |
| TNFSF13B | -2.5 | 2.69E-04 |
| KCNJ2    | -2.5 | 2.94E-04 |
| NT5E     | -2.5 | 1.78E-04 |
| DAPK1    | -2.5 | 8.50E-03 |
| PRSS12   | -2.5 | 5.62E-03 |
| SLA-DQB1 | -2.5 | 1.55E-03 |
| BTC      | -2.4 | 1.84E-02 |
| LYPD6    | -2.4 | 1.56E-02 |
| SLA-DMB  | -2.4 | 3.61E-04 |
| PPFIA4   | -2.4 | 2.68E-02 |
| C4BPAL   | -2.4 | 3.78E-02 |
| IPCEF1   | -2.3 | 2.46E-02 |
| DMD      | -2.3 | 4.69E-05 |
| C3AR1    | -2.3 | 5.27E-03 |
| KIT      | -2.3 | 2.04E-02 |
| PDGFC    | -2.3 | 2.70E-03 |
| RPL35A   | -2.3 | 1.95E-03 |
| CXCL12   | -2.3 | 5.03E-03 |
| CNTN1    | -2.3 | 2.41E-02 |
| CST3     | -2.3 | 3.93E-04 |
| GPR82    | -2.2 | 1.35E-02 |
| AHRR     | -2.2 | 2.98E-02 |
| LPXN     | -2.2 | 1.56E-03 |
| SLC16A1  | -2.2 | 1.59E-03 |
| PTPN7    | -2.2 | 1.83E-03 |
| EGLN3    | -2.2 | 1.65E-03 |
| CD4      | -2.2 | 1.61E-02 |
| ADIPOQ   | -2.2 | 4.06E-03 |
| ADAMTS5  | -2.2 | 1.84E-02 |
| APH1B    | -2.2 | 3.53E-02 |
| TMTC1    | -2.2 | 2.39E-02 |

|         |      |          |
|---------|------|----------|
| SESN3   | -2.2 | 5.41E-04 |
| CHL1    | -2.2 | 1.49E-02 |
| SMAD9   | -2.2 | 3.79E-04 |
| ZNF672  | -2.1 | 1.41E-02 |
| TLR8    | -2.1 | 1.41E-02 |
| PGM5    | -2.1 | 8.60E-04 |
| DTNA    | -2.1 | 2.37E-02 |
| MPEG1   | -2.1 | 7.99E-03 |
| SLC8A1  | -2.1 | 2.28E-03 |
| CD302   | -2.1 | 6.84E-03 |
| CD3G    | -2.1 | 8.80E-03 |
| SLAMF6  | -2.1 | 4.40E-02 |
| HPSE    | -2.1 | 4.45E-03 |
| MAF     | -2.1 | 1.40E-02 |
| RARRES1 | -2.0 | 2.81E-03 |
| PIK3AP1 | -2.0 | 6.93E-03 |
| PLXNC1  | -2.0 | 1.18E-03 |
| CCL2    | -2.0 | 1.38E-03 |
| ZNF568  | -2.0 | 1.33E-02 |
| FAM65B  | -2.0 | 2.68E-02 |
| LRIG2   | -2.0 | 5.03E-03 |
| SDPR    | -2.0 | 4.88E-03 |
| SLC22A5 | -2.0 | 4.83E-02 |
| TLR7    | -2.0 | 4.66E-02 |
| RDH10   | -2.0 | 2.25E-02 |
| PCMTD2  | -2.0 | 2.03E-02 |
| CALD1   | -2.0 | 5.64E-03 |
| CYP4V2  | -2.0 | 1.52E-02 |
| COL6A5  | -2.0 | 1.50E-02 |
| SLC4A7  | -2.0 | 2.41E-02 |
| NPL     | -1.9 | 2.41E-02 |
| MAFB    | -1.9 | 5.99E-03 |
| ABCA1   | -1.9 | 5.62E-03 |
| C5      | -1.9 | 1.14E-02 |
| NFATC2  | -1.9 | 4.03E-02 |
| CD48    | -1.9 | 1.09E-02 |
| LRP12   | -1.9 | 2.33E-02 |
| ALDH6A1 | -1.9 | 5.11E-03 |
| SLC25A3 | -1.9 | 2.19E-02 |
| FGL2    | -1.9 | 2.08E-02 |
| DOCK10  | -1.9 | 1.58E-02 |
| SLA-DMA | -1.9 | 1.99E-02 |
| NREP    | -1.9 | 1.71E-02 |
| SATB1   | -1.9 | 1.64E-02 |
| CFL2    | -1.9 | 2.19E-02 |
| CD2     | -1.8 | 9.24E-03 |
| BANK1   | -1.8 | 4.81E-02 |

|          |      |          |
|----------|------|----------|
| LY9      | -1.8 | 4.79E-02 |
| ERAP1    | -1.8 | 3.18E-02 |
| PPAP2B   | -1.8 | 1.44E-02 |
| RBMS1    | -1.8 | 1.68E-02 |
| FRZB     | -1.8 | 3.93E-02 |
| DIXDC1   | -1.8 | 2.08E-02 |
| IGJ      | -1.8 | 1.92E-02 |
| AHCYL2   | -1.8 | 2.15E-02 |
| IGSF5    | -1.8 | 1.18E-02 |
| SLA-3    | -1.8 | 3.72E-02 |
| ITGAE    | -1.8 | 4.27E-02 |
| PTCH1    | -1.8 | 3.72E-02 |
| ITGA4    | -1.7 | 4.03E-02 |
| SCARA5   | -1.7 | 3.55E-02 |
| CDC42EP3 | -1.7 | 4.01E-02 |
| PAG1     | -1.7 | 4.72E-02 |
| SYNE1    | -1.7 | 3.52E-02 |
| KCTD12   | -1.7 | 4.66E-02 |
| CRLF3    | -1.7 | 4.24E-02 |
| COL14A1  | -1.7 | 3.72E-02 |
| MPDZ     | -1.7 | 3.53E-02 |
| CYP7B1   | -1.7 | 4.83E-02 |
| CD109    | -1.7 | 4.15E-02 |
| TSPAN7   | -1.7 | 4.78E-02 |
| SEC11C   | 1.7  | 4.83E-02 |
| MIF      | 1.7  | 4.03E-02 |
| PLA2G16  | 1.8  | 4.03E-02 |
| GLUL     | 1.8  | 4.41E-02 |
| SLC35C1  | 1.8  | 4.89E-02 |
| TARS     | 1.8  | 3.43E-02 |
| MAZ      | 1.8  | 3.53E-02 |
| S100A14  | 1.8  | 2.70E-02 |
| SMARCE1  | 1.8  | 1.98E-02 |
| SERPINB8 | 1.8  | 2.66E-02 |
| FOXA1    | 1.8  | 3.01E-02 |
| PIK3C2A  | 1.8  | 2.22E-02 |
| PMPCA    | 1.8  | 3.50E-02 |
| WDR1     | 1.9  | 4.04E-02 |
| MIR1282  | 1.9  | 2.53E-02 |
| CFL1     | 1.9  | 4.46E-02 |
| IGFBP5   | 1.9  | 2.01E-02 |
| MCF2L    | 1.9  | 1.98E-02 |
| PRTFDC1  | 1.9  | 1.86E-02 |
| NDUFA6   | 1.9  | 1.39E-02 |
| DDX54    | 1.9  | 4.32E-02 |
| MRPL51   | 1.9  | 1.72E-02 |
| LSS      | 1.9  | 3.03E-02 |

|          |     |          |
|----------|-----|----------|
| LRRC59   | 1.9 | 3.60E-02 |
| MKI67    | 1.9 | 1.58E-02 |
| SUMO4    | 1.9 | 3.77E-02 |
| STARD10  | 1.9 | 1.91E-02 |
| BOLA2    | 1.9 | 2.95E-02 |
| PSMB7    | 1.9 | 7.05E-03 |
| SLC39A7  | 1.9 | 9.92E-03 |
| MAGOH    | 1.9 | 1.71E-02 |
| PTN      | 1.9 | 1.03E-02 |
| CNOT3    | 2.0 | 3.50E-02 |
| CENPJ    | 2.0 | 4.45E-02 |
| SKA2     | 2.0 | 9.87E-03 |
| ATOH1    | 2.0 | 2.41E-02 |
| HSD11B1  | 2.0 | 2.19E-02 |
| SMPDL3B  | 2.0 | 1.67E-02 |
| FDPS     | 2.0 | 3.53E-02 |
| SERPINB6 | 2.0 | 1.67E-02 |
| TIMM17A  | 2.0 | 1.40E-02 |
| SLC25A1  | 2.0 | 4.03E-02 |
| CXCL16   | 2.0 | 2.89E-03 |
| LRRC8A   | 2.0 | 1.64E-02 |
| SEMA7A   | 2.1 | 2.41E-02 |
| PSTPIP2  | 2.1 | 5.66E-03 |
| GADD45B  | 2.1 | 4.75E-02 |
| SMAGP    | 2.1 | 4.78E-02 |
| ARHGDI1A | 2.1 | 1.87E-02 |
| HDLBP    | 2.1 | 1.81E-02 |
| UAP1L1   | 2.1 | 1.98E-02 |
| ERN2     | 2.1 | 1.54E-02 |
| DPP9     | 2.1 | 5.03E-03 |
| TGM2     | 2.2 | 7.15E-03 |
| SERPINB5 | 2.2 | 1.56E-03 |
| PYCR1    | 2.2 | 4.03E-02 |
| BCL3     | 2.2 | 2.84E-03 |
| PKM      | 2.2 | 2.62E-02 |
| DPRX     | 2.2 | 1.71E-02 |
| TRAPPC6A | 2.2 | 4.81E-02 |
| TUBA1C   | 2.2 | 3.01E-02 |
| TMEM54   | 2.2 | 1.11E-02 |
| CDH1     | 2.2 | 3.28E-03 |
| AREG     | 2.2 | 8.37E-03 |
| ROS1     | 2.2 | 8.87E-04 |
| RIPK3    | 2.3 | 1.33E-02 |
| UBE2S    | 2.3 | 2.19E-02 |
| CCNB2    | 2.3 | 3.45E-04 |
| ADAMTS1  | 2.3 | 4.06E-04 |
| B3GNT6   | 2.3 | 7.21E-03 |

|          |     |          |
|----------|-----|----------|
| ABCA12   | 2.3 | 4.40E-02 |
| CABIN1   | 2.3 | 1.96E-03 |
| FFAR4    | 2.3 | 2.68E-02 |
| MYBL2    | 2.4 | 3.34E-03 |
| P2RX4    | 2.4 | 8.14E-04 |
| CYP2B22  | 2.4 | 4.65E-02 |
| ND1      | 2.4 | 1.59E-03 |
| LIPH     | 2.4 | 1.88E-04 |
| TACC3    | 2.4 | 6.84E-03 |
| DEPDC7   | 2.4 | 3.67E-02 |
| GCNT3    | 2.4 | 4.06E-04 |
| IL1A     | 2.4 | 1.55E-03 |
| HMGA1    | 2.4 | 5.03E-03 |
| FAM20C   | 2.4 | 2.79E-02 |
| BGN      | 2.5 | 1.81E-02 |
| HSPA1L   | 2.5 | 4.83E-02 |
| PFKFB3   | 2.5 | 7.15E-03 |
| GALNT6   | 2.5 | 5.55E-03 |
| TNFRSF26 | 2.5 | 2.44E-02 |
| NT5DC2   | 2.5 | 2.37E-02 |
| CSRP2    | 2.5 | 1.20E-02 |
| PTPRN2   | 2.5 | 3.72E-02 |
| BIRC5    | 2.6 | 1.37E-03 |
| KCNE3    | 2.6 | 3.51E-05 |
| FGF7     | 2.6 | 5.67E-04 |
| TUBB3    | 2.6 | 2.11E-03 |
| ITGB6    | 2.6 | 7.63E-03 |
| GSTA1    | 2.7 | 4.73E-02 |
| CDX1     | 2.7 | 1.73E-03 |
| PNP      | 2.7 | 1.83E-03 |
| KCNJ11   | 2.7 | 3.31E-02 |
| TPSB2    | 2.8 | 2.68E-02 |
| RRBP1    | 2.8 | 8.06E-05 |
| PHLDA2   | 2.8 | 2.79E-03 |
| MDK      | 2.8 | 4.44E-04 |
| FCN2     | 2.9 | 9.94E-05 |
| CAPNS2   | 2.9 | 2.12E-03 |
| PLA2G3   | 2.9 | 4.90E-03 |
| SPDEF    | 3.0 | 1.13E-04 |
| BPIFB2   | 3.0 | 3.18E-02 |
| LAMB3    | 3.0 | 6.87E-04 |
| ME1      | 3.1 | 9.19E-03 |
| FUT2     | 3.1 | 1.38E-03 |
| F3       | 3.1 | 4.09E-05 |
| ETV4     | 3.1 | 4.03E-02 |
| ABAT     | 3.2 | 1.73E-05 |
| SLC7A5   | 3.3 | 1.30E-03 |

|           |     |          |
|-----------|-----|----------|
| FABP3     | 3.3 | 3.51E-08 |
| HK2       | 3.3 | 1.33E-05 |
| STEAP4    | 3.4 | 5.33E-03 |
| CLDN8     | 3.5 | 1.41E-02 |
| CLCA1     | 3.5 | 9.80E-09 |
| PRKCG     | 3.5 | 4.38E-02 |
| SERPINB10 | 3.5 | 2.87E-04 |
| DIO2      | 3.5 | 1.15E-03 |
| DNAH8     | 3.7 | 3.59E-02 |
| IGFBP4    | 3.7 | 6.25E-07 |
| TNFSF18   | 3.8 | 3.17E-02 |
| NRG1      | 3.8 | 2.41E-02 |
| TIMP1     | 3.9 | 2.94E-04 |
| LOC396756 | 4.0 | 1.51E-06 |
| PTGS2     | 4.0 | 1.30E-07 |
| TNFRSF8   | 4.0 | 2.04E-02 |
| SLC9C1    | 4.1 | 7.81E-04 |
| CHI3L2    | 4.2 | 4.97E-04 |
| GNMT      | 4.3 | 2.10E-02 |
| AKR1C4    | 4.3 | 2.30E-05 |
| SLC7A11   | 4.3 | 6.75E-07 |
| TLE6      | 4.4 | 1.34E-02 |
| CXCL14    | 4.4 | 2.73E-06 |
| PDZK1IP1L | 4.5 | 1.44E-02 |
| CXCL17    | 4.5 | 7.44E-06 |
| TNIP3     | 4.5 | 5.90E-06 |
| BAALC     | 4.5 | 3.96E-03 |
| BDKRB1    | 4.6 | 1.70E-02 |
| PI3       | 4.6 | 2.55E-08 |
| KRT18     | 4.7 | 7.48E-10 |
| SAPCD2    | 4.7 | 1.19E-03 |
| PLAUR     | 4.8 | 6.11E-06 |
| SLPI      | 4.8 | 2.22E-11 |
| COL28A1   | 4.9 | 5.31E-06 |
| MMP3      | 4.9 | 3.31E-10 |
| PHGDH     | 5.0 | 9.01E-04 |
| IL17C     | 5.0 | 7.15E-03 |
| SLC5A8    | 5.0 | 1.13E-04 |
| GSTA2     | 5.4 | 4.30E-03 |
| BTN1A1L2* | 5.4 | 2.54E-02 |
| CA4       | 5.5 | 9.51E-10 |
| CBS       | 5.5 | 7.18E-05 |
| AGR2      | 5.6 | 1.73E-11 |
| SDS       | 5.7 | 8.06E-05 |
| MIR6087   | 6.0 | 1.14E-02 |
| IL1R2     | 6.1 | 1.51E-06 |
| MUC2      | 6.3 | 2.16E-16 |

|            |       |          |
|------------|-------|----------|
| CHI3L1     | 6.4   | 1.03E-13 |
| B3GNT7     | 6.4   | 1.16E-05 |
| UPK1B      | 6.5   | 1.59E-03 |
| TAT        | 6.9   | 3.49E-02 |
| GSTP1L2*   | 6.9   | 3.53E-02 |
| RNF39      | 7.0   | 1.51E-06 |
| IL36A      | 7.2   | 2.58E-03 |
| MMP1       | 7.3   | 6.53E-13 |
| TCN1       | 8.0   | 1.44E-10 |
| SPINK4     | 8.1   | 9.43E-22 |
| S100A8     | 8.2   | 1.02E-02 |
| MPTX       | 8.3   | 4.03E-15 |
| SERPINB11  | 8.4   | 7.38E-04 |
| SLCO1A2    | 8.6   | 6.00E-04 |
| SP6        | 9.3   | 1.01E-02 |
| HCAR2      | 9.3   | 6.76E-05 |
| MMP9       | 9.3   | 1.00E-02 |
| ADAM30     | 9.6   | 8.58E-03 |
| MMP12      | 9.7   | 4.45E-16 |
| S100A9     | 9.8   | 1.83E-03 |
| TGM3       | 10.0  | 3.03E-05 |
| S100A2     | 10.0  | 3.03E-27 |
| REG4       | 11.1  | 8.84E-20 |
| IGHG1      | 11.1  | 3.80E-06 |
| HTR1B      | 11.8  | 2.40E-02 |
| GYS2       | 11.9  | 5.62E-03 |
| S100A12    | 12.8  | 4.09E-05 |
| PDZK1IP1*  | 13.6  | 1.24E-05 |
| AKR1C1     | 13.8  | 3.93E-07 |
| GABRP      | 15.7  | 1.59E-03 |
| A2ML1      | 16.0  | 2.14E-03 |
| SERPINB2   | 16.2  | 4.90E-32 |
| SLC6A2     | 18.7  | 1.53E-02 |
| PSAT1      | 20.6  | 4.69E-11 |
| IL11       | 21.6  | 6.84E-03 |
| TFF1       | 25.9  | 2.62E-06 |
| MMP13      | 27.5  | 9.71E-29 |
| ARG1       | 30.1  | 2.28E-07 |
| IL36B      | 30.8  | 1.02E-02 |
| ANXA8      | 34.8  | 6.97E-40 |
| TFF2       | 37.1  | 6.93E-10 |
| MMP7       | 53.1  | 4.09E-05 |
| IFITM1L3*  | 63.2  | 1.59E-02 |
| HOXB13     | 132.7 | 1.59E-02 |
| SLC7A3L11* | 188.2 | 1.59E-03 |
| IL4I1L     | 437.7 | 1.59E-14 |
