# Supplementary material for: Molecular and metabolomic changes in the proximal colon of pigs infected with Trichuris suis
Source: PubMed Central journal article supplement (PMC7393168; doi:10.1038/s41598-020-69462-5), 2020-07-30
Supplement: 41598_2020_69462_MOESM5_ESM.pdf [file 41598_2020_69462_MOESM5_ESM.pdf]

**Molecular and metabolomic changes in the proximal colon of pigs infected with *Trichuris suis***

Harry Dawson<sup>1</sup>, Celine Chen<sup>1</sup>, Robert Li<sup>2</sup>, Lauren Nicki Bell<sup>3</sup>, Terez Shea-Donohue<sup>4</sup>, Helene Kringel<sup>5</sup>, Ethiopia Beshah<sup>1</sup>, Dolores E. Hill<sup>2</sup>, Joseph F. Urban Jr<sup>1,2</sup>.

<sup>1</sup>United States Department of Agriculture, Agricultural Research Service, Northeast Area, Beltsville Human Nutrition Research Center, Diet Genomics and Immunology Laboratory, <sup>2</sup> Beltsville Agricultural Research Center, Animal Parasitology Disease Laboratory, Beltsville, MD; <sup>3</sup>Metabolon, Inc., Morrisville, NC; <sup>4</sup>University of Maryland School of Medicine, Baltimore, MD, USA; <sup>5</sup>Department of Veterinary Disease Biology, Faculty of Health and Medical Sciences, University of Copenhagen, Copenhagen, Denmark

Supplemental Table S5

Supplemental Table S5. Comparison of DEGs expressed in the proximal colon of pigs at 52 days after inoculation with worms compared to uninfected controls.

| Gene     | Fold change | EDGE FDR p-value |
|----------|-------------|------------------|
| SLC10A2  | -1285.8     | 8.30E-08         |
| ALPI     | -159.7      | 2.09E-10         |
| EVX1     | -38.1       | 2.47E-02         |
| ASTL     | -37.2       | 2.34E-02         |
| CLCA4    | -27.9       | 1.34E-07         |
| ALDOB    | -27.7       | 2.35E-07         |
| GSTA2    | -26.6       | 8.94E-06         |
| CYP2B22  | -26.4       | 2.38E-06         |
| BTNL2    | -21.7       | 9.02E-03         |
| HMGCS2   | -21.2       | 0.00E+00         |
| NXPE2    | -20.1       | 2.40E-06         |
| NR1H4    | -17.1       | 2.31E-11         |
| PCK1     | -16.9       | 1.62E-07         |
| FRMD1    | -15.5       | 9.59E-05         |
| OASL     | -14.4       | 5.68E-03         |
| SLC14A1  | -13.9       | 1.46E-02         |
| FOXO6    | -13.7       | 8.20E-06         |
| AQP8     | -13.7       | 2.47E-03         |
| SLC26A3  | -12.7       | 8.30E-08         |
| NCR2     | -12.1       | 1.81E-05         |
| CD5L     | -10.9       | 8.19E-04         |
| THAP12   | -10.5       | 4.27E-02         |
| ALPIL1*  | -10.3       | 1.67E-04         |
| SLC30A10 | -10.2       | 3.00E-03         |
| SDR9C7   | -9.3        | 8.99E-03         |
| MOGAT2   | -9.2        | 1.14E-03         |
| AGT      | -8.7        | 1.64E-05         |
| PADI2    | -8.6        | 1.42E-09         |
| GRIK1    | -8.6        | 4.27E-02         |
| HAS3     | -8.4        | 9.20E-06         |
| SULT1E1  | -8.2        | 1.08E-09         |
| SI       | -7.9        | 8.57E-03         |
| SLC25A34 | -7.8        | 1.41E-09         |
| COL6A6   | -7.8        | 1.07E-07         |
| SLC38A4  | -7.7        | 3.14E-09         |
| PDK4     | -7.7        | 2.11E-04         |
| LCN15    | -7.6        | 4.90E-02         |
| ABCG2    | -7.6        | 6.40E-07         |
| CXCL9    | -7.5        | 6.02E-04         |
| CEACAM8  | -7.5        | 1.20E-02         |
| NCR1     | -7.2        | 1.19E-06         |
| SLC51A   | -6.9        | 2.76E-08         |
| P2RX3    | -6.5        | 3.20E-05         |
| ABCA6    | -6.5        | 3.05E-06         |
| GUCA2A   | -6.3        | 2.26E-05         |
| TM6SF2   | -6.3        | 2.26E-14         |
| CA12     | -6.2        | 4.33E-13         |
| DNAI1    | -6.1        | 1.42E-02         |
| RDH16    | -6.1        | 3.20E-03         |
| TRPV6    | -6.0        | 4.34E-02         |
| IFI27    | -5.8        | 7.91E-04         |
| SSTR5    | -5.7        | 4.20E-03         |
| SLC16A1  | -5.7        | 0.00E+00         |
| CA1      | -5.6        | 4.33E-12         |
| CCL3L2   | -5.4        | 6.08E-03         |
| GABRB2   | -5.4        | 4.12E-06         |
| GPIHBP1  | -5.3        | 6.94E-04         |
| ANPEP    | -5.2        | 3.11E-04         |
| XCL1     | -5.2        | 1.96E-06         |
| CYP26B1  | -5.0        | 2.61E-08         |
| IGF2-AS  | -5.0        | 1.71E-02         |
| OPRL1    | -4.9        | 3.95E-04         |
| PIPOX    | -4.9        | 6.45E-03         |
| EOMES    | -4.8        | 1.12E-04         |
| FOXJ1    | -4.8        | 4.62E-03         |
| CXCL11   | -4.8        | 3.33E-02         |
| IL12B    | -4.7        | 1.02E-02         |
| CLEC4F   | -4.6        | 4.26E-02         |
| DACT2    | -4.6        | 4.67E-02         |
| EDN3     | -4.6        | 7.22E-03         |
| SLC24A4  | -4.4        | 2.68E-06         |
| RSAD2    | -4.4        | 2.06E-02         |

|          |      |          |
|----------|------|----------|
| SELENBP1 | -4.4 | 1.11E-11 |
| ADIPOQ   | -4.2 | 5.00E-04 |
| CD207    | -4.2 | 4.37E-02 |
| KLF11    | -4.2 | 3.47E-05 |
| CHP2     | -4.1 | 1.38E-07 |
| UGT2C1*  | -4.1 | 8.74E-11 |
| DLX4     | -4.1 | 2.69E-03 |
| ABCA8    | -4.1 | 3.01E-03 |
| CLDN10   | -4.1 | 3.30E-03 |
| PLIN1    | -4.0 | 3.06E-02 |
| PARP15   | -4.0 | 3.90E-04 |
| GZMK     | -4.0 | 1.31E-02 |
| SCNN1B   | -3.8 | 3.19E-02 |
| GPR162   | -3.8 | 1.31E-03 |
| WNT8B    | -3.8 | 2.30E-04 |
| DLX3     | -3.8 | 2.11E-02 |
| GDF5     | -3.8 | 1.25E-02 |
| FOXS1    | -3.8 | 3.26E-05 |
| FABP1    | -3.7 | 5.00E-05 |
| KLRD1L   | -3.7 | 1.90E-04 |
| HSD17B6  | -3.7 | 1.19E-02 |
| CD36     | -3.7 | 8.88E-09 |
| CIDEA    | -3.6 | 1.99E-03 |
| CTBS     | -3.6 | 8.38E-03 |
| SLC25A42 | -3.6 | 1.96E-06 |
| RNF112   | -3.5 | 1.01E-03 |
| VIP      | -3.5 | 5.68E-03 |
| CNTFR    | -3.5 | 4.40E-04 |
| IRF4L    | -3.4 | 5.23E-03 |
| SIGLEC15 | -3.4 | 5.06E-02 |
| CXCL10   | -3.4 | 3.22E-02 |
| SECTM1   | -3.4 | 1.23E-03 |
| ZBP1     | -3.4 | 5.56E-04 |
| DHX58    | -3.3 | 7.59E-03 |
| SELENOP  | -3.3 | 2.97E-08 |
| ISX      | -3.3 | 2.28E-03 |
| IGF2     | -3.2 | 5.66E-04 |
| PRSS12   | -3.2 | 1.43E-04 |
| XAF1     | -3.2 | 5.31E-02 |
| ABI3BP   | -3.2 | 4.50E-05 |
| SLC30A3  | -3.1 | 8.38E-03 |
| LYPD6    | -3.1 | 7.55E-03 |
| CLCA4L   | -3.1 | 1.92E-02 |
| SLC7A8   | -3.1 | 2.76E-05 |
| NECAB2   | -3.1 | 1.88E-02 |
| GSTM1    | -3.0 | 2.39E-05 |
| AOC1     | -3.0 | 3.91E-07 |
| ABCA9    | -3.0 | 3.15E-02 |
| GAL      | -3.0 | 4.97E-02 |
| CCR9     | -3.0 | 5.47E-02 |
| ASPA     | -2.9 | 4.20E-03 |
| ANGPTL4  | -2.9 | 1.19E-03 |
| GSTM4    | -2.9 | 3.46E-06 |
| IFI44    | -2.9 | 1.80E-02 |
| PRDX6    | -2.9 | 1.45E-07 |
| SLC35D3  | -2.9 | 3.46E-02 |
| BDH1     | -2.9 | 4.31E-08 |
| TMPRSS13 | -2.8 | 1.67E-02 |
| CARD14   | -2.8 | 6.03E-05 |
| AHRR     | -2.8 | 3.02E-04 |
| FBXO32   | -2.8 | 1.02E-04 |
| SIRPB2   | -2.8 | 6.49E-03 |
| CD209    | -2.8 | 1.42E-03 |
| SLC46A3  | -2.8 | 2.40E-06 |
| ACSBG1   | -2.8 | 4.00E-02 |
| SLC7A3L6 | -2.8 | 1.70E-02 |
| CD4      | -2.8 | 1.41E-04 |
| CXCL12   | -2.7 | 6.31E-04 |
| NMRAL1L* | -2.7 | 1.81E-02 |
| FAAH     | -2.7 | 6.61E-04 |
| UGT1A3   | -2.7 | 2.57E-02 |
| CA11     | -2.7 | 7.55E-03 |
| FABP4    | -2.7 | 1.86E-02 |
| NGB      | -2.7 | 3.12E-02 |

|              |      |          |
|--------------|------|----------|
| ZFP84L       | -2.7 | 3.53E-03 |
| ABCB4        | -2.7 | 2.10E-02 |
| LRP1B        | -2.7 | 1.12E-02 |
| MAOA         | -2.7 | 1.11E-07 |
| LILRB3L4     | -2.7 | 2.84E-02 |
| MAMDC2       | -2.7 | 2.50E-03 |
| WNT11        | -2.7 | 1.51E-02 |
| GRIK4        | -2.7 | 1.76E-02 |
| SLC8A2       | -2.7 | 2.11E-02 |
| PTPRD        | -2.6 | 1.41E-04 |
| ACE          | -2.6 | 7.25E-05 |
| SLC7A3L4     | -2.6 | 4.44E-03 |
| TXNIP        | -2.6 | 5.39E-05 |
| GBP6         | -2.6 | 5.25E-03 |
| GSTT1        | -2.6 | 1.25E-03 |
| AURKC        | -2.6 | 3.68E-03 |
| UBE2L6       | -2.6 | 1.15E-04 |
| P2RY13       | -2.6 | 6.61E-04 |
| ADGRB1       | -2.6 | 1.64E-02 |
| IFITM1       | -2.6 | 1.45E-02 |
| C1QB         | -2.6 | 4.13E-05 |
| C11orf86     | -2.5 | 4.92E-04 |
| SULT1C4      | -2.5 | 1.40E-04 |
| CD74         | -2.5 | 2.92E-04 |
| ZKSCAN2      | -2.5 | 4.12E-02 |
| KLRC1        | -2.5 | 2.35E-02 |
| CIRBP        | -2.5 | 3.91E-05 |
| IL34         | -2.5 | 3.63E-04 |
| ADGRE4       | -2.4 | 9.29E-06 |
| GBP2         | -2.4 | 1.02E-02 |
| AHCYL2       | -2.4 | 5.80E-06 |
| SLC7A3L7     | -2.4 | 3.11E-02 |
| SCARA5       | -2.4 | 2.08E-02 |
| DBP          | -2.4 | 3.71E-03 |
| PLCD1        | -2.4 | 1.77E-06 |
| GBP4         | -2.4 | 4.83E-02 |
| COL4A3       | -2.4 | 4.44E-02 |
| SLA-DRA      | -2.4 | 1.06E-03 |
| ADGB         | -2.4 | 3.63E-02 |
| TMPRSS2      | -2.4 | 1.23E-04 |
| SLA-DOA      | -2.4 | 3.71E-03 |
| TMEM140      | -2.4 | 2.01E-06 |
| CCL4         | -2.4 | 1.16E-02 |
| APOL2        | -2.4 | 1.75E-04 |
| RBP5         | -2.4 | 5.79E-03 |
| PNPLA2       | -2.4 | 1.05E-06 |
| ANK3         | -2.4 | 8.67E-03 |
| TLR8         | -2.3 | 1.46E-03 |
| C1QA         | -2.3 | 4.91E-05 |
| ANKH         | -2.3 | 7.37E-03 |
| C1QC         | -2.3 | 5.39E-05 |
| SLC39A5      | -2.3 | 3.63E-02 |
| IL12RB2      | -2.3 | 4.34E-02 |
| TUBAL3       | -2.3 | 3.93E-02 |
| CD83         | -2.3 | 1.40E-02 |
| IHH          | -2.3 | 3.41E-05 |
| THNSL2       | -2.3 | 1.15E-03 |
| HAPLN4       | -2.3 | 1.17E-04 |
| SLA-3        | -2.3 | 1.89E-04 |
| ADRB1        | -2.3 | 1.40E-03 |
| VEGF         | -2.3 | 3.28E-02 |
| IFITM1L2*    | -2.3 | 6.10E-05 |
| SLC46A2      | -2.3 | 6.48E-03 |
| HOXD10       | -2.3 | 8.74E-03 |
| IFI44L       | -2.3 | 3.75E-03 |
| SLA-11       | -2.3 | 1.08E-04 |
| PCSK6        | -2.3 | 1.07E-05 |
| CD300H       | -2.3 | 1.10E-05 |
| LOC106509843 | -2.3 | 1.93E-02 |
| SLA-DQA1     | -2.3 | 3.27E-03 |
| SLA-DQB1     | -2.3 | 1.13E-02 |
| CD36L1       | -2.3 | 2.24E-03 |
| ABCC6        | -2.2 | 4.92E-02 |
| MAF          | -2.2 | 1.08E-04 |

|              |      |          |
|--------------|------|----------|
| RETSAT       | -2.2 | 4.10E-06 |
| FCGR3A       | -2.2 | 8.60E-05 |
| LGALS9       | -2.2 | 2.92E-04 |
| SLA-DMB      | -2.2 | 8.10E-04 |
| CD8A         | -2.2 | 4.54E-03 |
| ZNF419       | -2.2 | 3.82E-02 |
| CD300C       | -2.2 | 5.26E-03 |
| LTBP4        | -2.2 | 9.11E-05 |
| CD27         | -2.2 | 4.87E-02 |
| PTPRO        | -2.2 | 3.59E-02 |
| EDIL3        | -2.2 | 2.93E-03 |
| CD7          | -2.2 | 4.61E-02 |
| ABCB1        | -2.2 | 2.05E-03 |
| PARP9        | -2.2 | 1.66E-04 |
| SLA-DRB1     | -2.2 | 5.60E-03 |
| PTCH1        | -2.2 | 1.80E-03 |
| EFNA3        | -2.2 | 2.20E-02 |
| TSPAN7       | -2.2 | 5.07E-06 |
| TST          | -2.2 | 3.80E-05 |
| TLR1         | -2.2 | 8.67E-04 |
| CXCR3        | -2.2 | 1.38E-02 |
| CYP7B1       | -2.2 | 9.83E-03 |
| COQ8A        | -2.2 | 9.79E-06 |
| MPEG1        | -2.2 | 4.93E-03 |
| KLHL7        | -2.1 | 2.73E-04 |
| NT5E         | -2.1 | 1.30E-02 |
| CES1B        | -2.1 | 5.66E-04 |
| P2RY12       | -2.1 | 5.25E-02 |
| ACSF2        | -2.1 | 6.81E-06 |
| NKPD1        | -2.1 | 4.23E-02 |
| LY9L1*       | -2.1 | 4.13E-03 |
| CYP2C91      | -2.1 | 5.29E-02 |
| CDKN2B       | -2.1 | 1.87E-04 |
| H1FO         | -2.1 | 7.02E-04 |
| LOC110255453 | -2.1 | 4.34E-02 |
| FOXH1        | -2.1 | 3.28E-02 |
| ADAMTSL5     | -2.1 | 3.76E-02 |
| CST3         | -2.1 | 1.99E-03 |
| ABCB6        | -2.1 | 2.65E-05 |
| SLC16A5      | -2.1 | 1.59E-03 |
| PARP14       | -2.1 | 1.16E-02 |
| LTB4R2       | -2.1 | 3.08E-02 |
| CASP1        | -2.1 | 9.13E-04 |
| LIFR         | -2.1 | 4.05E-04 |
| SLC25A20     | -2.1 | 1.13E-04 |
| SLC25A27     | -2.1 | 1.55E-05 |
| METTL7A      | -2.1 | 1.05E-04 |
| SLA-DMA      | -2.1 | 4.61E-03 |
| CTSD         | -2.1 | 3.64E-04 |
| ZNF548       | -2.1 | 1.71E-02 |
| TMPRSS4      | -2.1 | 4.56E-05 |
| PLCB2        | -2.0 | 1.74E-03 |
| MLYCD        | -2.0 | 1.50E-03 |
| CECR1        | -2.0 | 4.20E-03 |
| CSMD1        | -2.0 | 3.76E-02 |
| AMT          | -2.0 | 3.33E-04 |
| GFRA1        | -2.0 | 4.61E-02 |
| CPT1A        | -2.0 | 2.94E-03 |
| KLRG1        | -2.0 | 5.07E-02 |
| WNT2B        | -2.0 | 3.42E-03 |
| PFKFB4       | -2.0 | 4.11E-05 |
| COBL         | -2.0 | 2.96E-06 |
| EXOC3L4      | -2.0 | 4.81E-04 |
| PKNOX2       | -2.0 | 2.25E-02 |
| MMP11        | -2.0 | 7.40E-04 |
| LAIR1        | -2.0 | 7.37E-03 |
| TLR5         | -2.0 | 4.03E-02 |
| CDH23        | -2.0 | 4.71E-02 |
| B2M          | -2.0 | 5.66E-04 |
| MDK          | -2.0 | 1.75E-02 |
| ABCC4L2      | -2.0 | 8.20E-03 |
| UGT1A1       | -2.0 | 1.54E-02 |
| NADK         | -2.0 | 5.86E-05 |
| TLR6         | -2.0 | 4.77E-03 |

|           |      |          |
|-----------|------|----------|
| EBI3      | -2.0 | 4.52E-02 |
| FBXW10    | -2.0 | 2.07E-02 |
| GBP1      | -1.9 | 5.21E-02 |
| SLC9A2    | -1.9 | 1.78E-04 |
| LGALS3BP  | -1.9 | 3.18E-02 |
| TSPAN11   | -1.9 | 4.35E-03 |
| SLC25A38  | -1.9 | 4.57E-04 |
| RGS10     | -1.9 | 2.55E-02 |
| OSBPL10   | -1.9 | 6.89E-03 |
| ZNF664    | -1.9 | 6.81E-05 |
| TAP1      | -1.9 | 5.73E-03 |
| CSTA      | -1.9 | 2.56E-02 |
| PYCARD    | -1.9 | 8.72E-03 |
| NCAM1     | -1.9 | 3.06E-02 |
| TCF7L1    | -1.9 | 2.24E-02 |
| BSG       | -1.9 | 1.92E-04 |
| ADHFE1    | -1.9 | 4.54E-02 |
| PIK3IP1   | -1.9 | 1.62E-03 |
| PGF       | -1.9 | 4.93E-02 |
| THAP8     | -1.9 | 4.60E-02 |
| ITIH5     | -1.9 | 1.46E-02 |
| IL10RA    | -1.9 | 8.53E-04 |
| CLEC3B    | -1.9 | 2.18E-03 |
| GLI2      | -1.9 | 3.33E-02 |
| ERBB2     | -1.9 | 1.33E-03 |
| SDPR      | -1.9 | 1.59E-02 |
| MT-CO3    | -1.9 | 4.64E-03 |
| SPIDR     | -1.9 | 2.85E-04 |
| OGDH      | -1.9 | 8.27E-05 |
| NOXO1     | -1.9 | 1.71E-03 |
| PDK2      | -1.9 | 1.11E-03 |
| TRANK1    | -1.9 | 1.91E-02 |
| TEF       | -1.9 | 3.52E-03 |
| SLC25A29  | -1.9 | 1.01E-02 |
| GIMAP8    | -1.9 | 1.74E-03 |
| CD302     | -1.9 | 9.28E-03 |
| AKR1E2    | -1.9 | 3.20E-03 |
| C7        | -1.9 | 3.94E-02 |
| ABCC4L5   | -1.8 | 2.09E-02 |
| SLC31A2   | -1.8 | 2.06E-02 |
| USH1C     | -1.8 | 4.24E-04 |
| CTSZ      | -1.8 | 4.19E-03 |
| SYNPO     | -1.8 | 7.65E-03 |
| MMP24     | -1.8 | 2.06E-02 |
| PSMB9     | -1.8 | 9.65E-03 |
| FGFRL1    | -1.8 | 8.75E-03 |
| MAP2K6    | -1.8 | 3.77E-02 |
| SLC45A4   | -1.8 | 1.06E-03 |
| GRINA     | -1.8 | 1.50E-03 |
| SLC43A2   | -1.8 | 2.00E-03 |
| RGL1      | -1.8 | 1.84E-03 |
| DAPK1     | -1.8 | 2.09E-02 |
| MEIS2     | -1.8 | 4.81E-02 |
| CD300LF   | -1.8 | 5.14E-02 |
| MTCP1     | -1.8 | 4.83E-02 |
| RNF213    | -1.8 | 4.61E-02 |
| ZNF709L5* | -1.8 | 4.65E-02 |
| UCP2      | -1.8 | 7.55E-03 |
| SNX4      | -1.8 | 7.26E-04 |
| DTX3L     | -1.8 | 7.69E-03 |
| PHACTR1   | -1.8 | 6.57E-03 |
| HSD17B1   | -1.8 | 4.04E-02 |
| CLCN2     | -1.8 | 4.79E-05 |
| CCR5      | -1.8 | 5.37E-03 |
| CYP27A1   | -1.8 | 3.99E-02 |
| PAX8      | -1.8 | 3.67E-02 |
| MOCS1     | -1.8 | 6.89E-03 |
| CADM1     | -1.8 | 3.02E-02 |
| TRPV3     | -1.8 | 1.05E-02 |
| ADA       | -1.8 | 1.88E-02 |
| RALGDS    | -1.8 | 2.82E-03 |
| TNFAIP2   | -1.8 | 2.30E-04 |
| TESK2     | -1.8 | 5.66E-03 |
| ASAP3     | -1.8 | 3.44E-03 |

|           |      |          |
|-----------|------|----------|
| SULT1B1   | -1.8 | 1.20E-03 |
| PSMB10    | -1.8 | 3.20E-03 |
| SOWAHA    | -1.8 | 2.63E-03 |
| SLC25A10  | -1.8 | 2.22E-04 |
| MMP25     | -1.8 | 1.15E-02 |
| IRF9      | -1.8 | 5.24E-03 |
| CD72      | -1.8 | 4.52E-02 |
| EGFLAM    | -1.8 | 2.10E-02 |
| VAMP2     | -1.8 | 1.77E-03 |
| GABBR1    | -1.8 | 2.17E-03 |
| FLT3LG    | -1.8 | 3.71E-03 |
| ADCY9     | -1.8 | 1.41E-04 |
| MTHFR     | -1.8 | 7.98E-03 |
| GPR34     | -1.8 | 2.92E-02 |
| GSTP1     | -1.8 | 7.59E-03 |
| TCF21     | -1.8 | 4.67E-03 |
| SLC7A3L2  | -1.8 | 4.24E-04 |
| SCIN      | -1.8 | 3.67E-02 |
| GABARAPL1 | -1.8 | 6.54E-04 |
| ADCY5     | -1.8 | 4.38E-02 |
| ACY1      | -1.7 | 9.49E-03 |
| PRAG1     | -1.7 | 1.02E-02 |
| ALDH6A1   | -1.7 | 1.15E-02 |
| DOCK6     | -1.7 | 4.13E-03 |
| MT-ATP6   | -1.7 | 1.36E-02 |
| TSKU      | -1.7 | 3.98E-02 |
| HADHA     | -1.7 | 1.84E-04 |
| ENO2      | -1.7 | 3.86E-02 |
| NPL       | -1.7 | 2.11E-02 |
| HSDL2     | -1.7 | 7.04E-04 |
| JAML      | -1.7 | 2.72E-02 |
| PLTP      | -1.7 | 1.75E-02 |
| MISP      | -1.7 | 2.06E-03 |
| UGT1A10   | -1.7 | 6.00E-04 |
| SLC7A3L8  | -1.7 | 1.79E-02 |
| MOV10     | -1.7 | 1.22E-03 |
| MERTK     | -1.7 | 7.59E-03 |
| N4BP2L1   | -1.7 | 5.30E-02 |
| AXIN2     | -1.7 | 3.42E-02 |
| TICAM1    | -1.7 | 1.41E-03 |
| CSF1R     | -1.7 | 3.70E-03 |
| CD68L1    | -1.7 | 1.16E-02 |
| MT-CO1    | -1.7 | 7.42E-03 |
| SLC27A1   | -1.7 | 3.17E-02 |
| PLA2G6    | -1.7 | 9.77E-03 |
| LCP2      | -1.7 | 7.46E-03 |
| CCL21     | -1.7 | 4.86E-02 |
| VDR       | -1.7 | 7.90E-03 |
| ACADS     | -1.7 | 2.96E-03 |
| APOE      | -1.7 | 3.18E-02 |
| LIPE      | -1.7 | 3.48E-02 |
| PARP3     | -1.7 | 3.15E-02 |
| ZNF362    | -1.7 | 7.88E-03 |
| MICALCL   | -1.7 | 2.78E-02 |
| DTX3      | -1.7 | 4.85E-03 |
| RFTN2     | -1.7 | 1.70E-02 |
| CRIP1     | -1.7 | 2.87E-02 |
| TSPAN4    | -1.7 | 3.42E-02 |
| NREP      | -1.7 | 4.99E-02 |
| NADSYN1   | -1.7 | 7.62E-03 |
| HPSE      | -1.6 | 1.75E-02 |
| LRIG2     | -1.6 | 5.77E-03 |
| DISP1     | -1.6 | 4.68E-03 |
| ATG2A     | -1.6 | 4.13E-03 |
| SPPL2B    | -1.6 | 7.40E-04 |
| ETHE1     | -1.6 | 1.38E-03 |
| ERAP2     | -1.6 | 4.60E-02 |
| DECR1     | -1.6 | 1.78E-03 |
| PSMB8     | -1.6 | 2.91E-02 |
| PLA2G4B   | -1.6 | 3.68E-02 |
| ACADSB    | -1.6 | 1.66E-03 |
| UGDH      | -1.6 | 2.77E-03 |
| HOXA11    | -1.6 | 5.12E-02 |
| TAP2      | -1.6 | 1.31E-02 |

|          |      |          |
|----------|------|----------|
| HGSNAT   | -1.6 | 1.40E-02 |
| ZNF358   | -1.6 | 1.34E-02 |
| COL4A6   | -1.6 | 3.19E-02 |
| PPARD    | -1.6 | 4.85E-03 |
| NAAA     | -1.6 | 3.53E-02 |
| LAPTM5   | -1.6 | 3.96E-02 |
| PNPLA7   | -1.6 | 4.92E-03 |
| NATD1    | -1.6 | 4.27E-02 |
| SLC44A4  | -1.6 | 3.27E-03 |
| GIMAP5   | -1.6 | 4.42E-02 |
| ACAD10   | -1.6 | 1.02E-02 |
| THRA     | -1.6 | 2.58E-02 |
| HS1BP3   | -1.6 | 1.12E-02 |
| ANKRD13A | -1.6 | 3.64E-03 |
| HDAC10   | -1.6 | 1.78E-03 |
| IRF8     | -1.6 | 1.94E-02 |
| NR3C2    | -1.6 | 2.11E-02 |
| CDX2     | -1.6 | 1.15E-02 |
| TYROBP   | -1.6 | 3.74E-02 |
| PSME1    | -1.6 | 5.26E-03 |
| BCAS3    | -1.6 | 2.27E-02 |
| INPP5K   | -1.6 | 7.22E-03 |
| GMPR     | -1.6 | 6.59E-03 |
| LTBP3    | -1.6 | 4.59E-02 |
| CYB5RL   | -1.6 | 5.37E-02 |
| ATG4A    | -1.6 | 1.45E-02 |
| KLC4     | -1.6 | 4.83E-03 |
| CD44     | -1.6 | 2.09E-02 |
| ERBB3    | -1.6 | 4.43E-02 |
| IVD      | -1.6 | 2.32E-02 |
| DHRS11   | -1.6 | 4.77E-03 |
| CYBB     | -1.6 | 3.34E-02 |
| RARRES2  | -1.6 | 4.83E-02 |
| PDXK     | -1.6 | 9.56E-03 |
| SLC6A6   | -1.6 | 5.12E-02 |
| SCARB2   | -1.6 | 1.71E-03 |
| HOXA5    | -1.6 | 1.74E-02 |
| FBP2     | -1.6 | 1.05E-02 |
| CERS6    | -1.6 | 3.04E-02 |
| SLA-8    | -1.6 | 1.98E-02 |
| LRP4     | -1.6 | 2.19E-02 |
| GALNS    | -1.6 | 1.45E-02 |
| PNPLA6   | -1.6 | 2.08E-02 |
| ASCC2    | -1.6 | 6.52E-04 |
| FTL      | -1.6 | 4.64E-02 |
| MYH14    | -1.6 | 1.75E-02 |
| MNT      | -1.6 | 1.51E-02 |
| ACAD11   | -1.6 | 1.82E-02 |
| NOP53    | -1.6 | 9.95E-03 |
| VAR52    | -1.5 | 1.93E-02 |
| MT-CO2   | -1.5 | 5.08E-02 |
| THSD4    | -1.5 | 2.95E-02 |
| MAP1LC3A | -1.5 | 1.88E-02 |
| TRAP1    | -1.5 | 1.76E-02 |
| SYNE1    | -1.5 | 4.67E-02 |
| VAV3     | -1.5 | 5.02E-02 |
| SLC9A3R1 | -1.5 | 1.36E-02 |
| FCER1G   | -1.5 | 5.31E-02 |
| CUEDC2   | -1.5 | 2.10E-02 |
| LIPA     | -1.5 | 3.68E-02 |
| TMEM94   | -1.5 | 4.35E-03 |
| MUL1     | -1.5 | 1.04E-02 |
| VSIR     | -1.5 | 1.46E-02 |
| NAT6     | -1.5 | 5.14E-02 |
| VIL1     | -1.5 | 2.16E-02 |
| PCBP4    | -1.5 | 4.08E-02 |
| CNNM4    | -1.5 | 1.45E-02 |
| TRIM66   | -1.5 | 2.93E-02 |
| TOM1L2   | -1.5 | 3.51E-02 |
| BBS4     | -1.5 | 1.94E-02 |
| CSF1     | -1.5 | 3.58E-02 |
| NT5C3A   | -1.5 | 4.41E-02 |
| ACVR1B   | -1.5 | 1.73E-02 |
| DIRC2    | -1.5 | 4.91E-02 |

|          |      |          |
|----------|------|----------|
| SCARF1   | -1.5 | 4.78E-02 |
| UVRAG    | -1.5 | 1.97E-02 |
| CTDSP2   | -1.5 | 2.09E-02 |
| IL17RA   | -1.5 | 1.36E-02 |
| SLC25A6  | -1.5 | 2.26E-02 |
| UNC93B1  | -1.5 | 4.49E-02 |
| BCL9L    | -1.5 | 4.61E-02 |
| NAV1     | -1.5 | 3.87E-02 |
| CLEC2D   | -1.5 | 5.17E-02 |
| DENND6B  | -1.5 | 5.10E-02 |
| PCGF2    | -1.5 | 4.54E-02 |
| SESN1    | -1.5 | 2.85E-02 |
| SLC25A5  | -1.5 | 2.24E-02 |
| BFAR     | -1.5 | 1.98E-02 |
| PSEN1    | -1.5 | 1.41E-02 |
| BCL2L14  | -1.5 | 2.85E-02 |
| TCN2     | -1.5 | 3.88E-02 |
| CAT      | -1.5 | 1.33E-02 |
| FCGRT    | -1.5 | 2.30E-02 |
| SLC13A1  | -1.5 | 4.47E-02 |
| SLC12A7  | -1.5 | 2.28E-02 |
| PPARA    | -1.5 | 4.14E-02 |
| MAFB     | -1.5 | 3.08E-02 |
| SP110    | -1.5 | 5.40E-02 |
| LENG8    | -1.5 | 4.23E-02 |
| ACOX1    | -1.5 | 1.80E-02 |
| ASPH     | 1.5  | 1.62E-02 |
| HM13     | 1.5  | 4.05E-02 |
| ZNF639   | 1.5  | 4.39E-02 |
| TOR1AIP1 | 1.5  | 9.73E-03 |
| MCF2L    | 1.5  | 4.37E-02 |
| SLC35B1  | 1.5  | 2.46E-02 |
| RNF115   | 1.5  | 3.78E-02 |
| VKORC1L1 | 1.5  | 1.66E-02 |
| ROCK1    | 1.5  | 3.08E-02 |
| SLC39A11 | 1.5  | 5.49E-02 |
| NUP153   | 1.5  | 2.91E-02 |
| MAPK8    | 1.5  | 3.25E-02 |
| MAP2K1   | 1.5  | 9.07E-03 |
| LRRC8A   | 1.5  | 5.45E-02 |
| UBE2N    | 1.5  | 3.17E-02 |
| EIF5     | 1.5  | 1.51E-02 |
| ACSL4    | 1.5  | 3.29E-02 |
| MTHFD1   | 1.5  | 1.94E-02 |
| FILIP1L  | 1.5  | 5.11E-02 |
| ANP32E   | 1.5  | 2.39E-02 |
| PTP4A1   | 1.5  | 4.70E-02 |
| RASA2    | 1.5  | 1.67E-02 |
| FAT1     | 1.5  | 4.34E-02 |
| SUGT1    | 1.5  | 3.17E-02 |
| UBA2     | 1.5  | 1.35E-02 |
| SLC37A3  | 1.5  | 7.96E-03 |
| TSPAN6   | 1.5  | 2.95E-02 |
| YARS     | 1.5  | 4.20E-03 |
| ITGB1    | 1.5  | 1.80E-02 |
| SMAD1    | 1.5  | 1.98E-02 |
| PSMD1    | 1.5  | 3.59E-02 |
| HMGN3    | 1.5  | 2.23E-02 |
| TNPO1    | 1.5  | 3.57E-02 |
| ZW10     | 1.5  | 1.38E-02 |
| PTPN11   | 1.5  | 1.93E-02 |
| RAPGEF2  | 1.5  | 7.74E-03 |
| DDX21    | 1.5  | 2.23E-02 |
| ACKR3    | 1.5  | 4.95E-02 |
| CEP350   | 1.5  | 2.57E-02 |
| SEC16A   | 1.5  | 1.69E-02 |
| LTBP1    | 1.5  | 2.73E-02 |
| KPNB1    | 1.5  | 1.97E-02 |
| MESDC1   | 1.5  | 1.49E-02 |
| WDR36    | 1.5  | 2.03E-02 |
| P2RX4    | 1.5  | 4.22E-02 |
| MAGT1    | 1.5  | 2.43E-02 |
| PDE4B    | 1.5  | 4.82E-02 |
| DDX18    | 1.5  | 2.76E-02 |

|          |     |          |
|----------|-----|----------|
| CLTC     | 1.5 | 3.32E-02 |
| SWAP70   | 1.5 | 2.99E-02 |
| UBR1     | 1.5 | 1.69E-02 |
| ARID3A   | 1.5 | 1.18E-02 |
| NOP58    | 1.5 | 4.61E-02 |
| PBRM1    | 1.5 | 3.12E-02 |
| SRPR     | 1.5 | 1.16E-02 |
| ZNF827   | 1.5 | 3.66E-02 |
| STARD10  | 1.5 | 3.63E-02 |
| TACC3    | 1.5 | 5.11E-02 |
| MSH2     | 1.5 | 3.64E-02 |
| SLC12A4  | 1.5 | 4.15E-03 |
| SRSF10   | 1.5 | 4.44E-03 |
| MOGS     | 1.5 | 5.43E-03 |
| CSE1L    | 1.5 | 5.73E-03 |
| QSER1    | 1.5 | 3.74E-02 |
| SMC1A    | 1.5 | 3.99E-02 |
| ASCC3    | 1.5 | 5.12E-02 |
| SLC35C1  | 1.5 | 4.14E-02 |
| PPIA     | 1.5 | 1.88E-02 |
| DSC2     | 1.5 | 4.78E-02 |
| GALNT1   | 1.5 | 4.20E-02 |
| MAL2     | 1.5 | 1.07E-02 |
| RAN      | 1.5 | 1.47E-02 |
| MANSC1   | 1.5 | 2.58E-02 |
| RACGAP1  | 1.5 | 5.25E-02 |
| CAD      | 1.5 | 1.90E-02 |
| HSPA4    | 1.5 | 1.23E-02 |
| ZBTB1    | 1.5 | 3.22E-02 |
| STARD5   | 1.5 | 4.88E-02 |
| SELENOI  | 1.5 | 5.04E-03 |
| CCP110   | 1.5 | 2.09E-02 |
| TVP23B   | 1.5 | 3.30E-03 |
| TMED2    | 1.5 | 1.25E-02 |
| TRIP11   | 1.5 | 1.75E-02 |
| LAMC1    | 1.6 | 2.40E-02 |
| DDX3X    | 1.6 | 5.28E-02 |
| ACACA    | 1.6 | 4.83E-03 |
| CANX     | 1.6 | 2.07E-02 |
| SEC23B   | 1.6 | 1.24E-02 |
| BZW1     | 1.6 | 3.18E-02 |
| IDE      | 1.6 | 7.53E-03 |
| SELENOF  | 1.6 | 1.38E-02 |
| SURF4    | 1.6 | 1.38E-02 |
| APEX1    | 1.6 | 3.94E-03 |
| GOLGA4   | 1.6 | 1.42E-02 |
| PRDM1    | 1.6 | 2.16E-02 |
| TOP2B    | 1.6 | 1.38E-02 |
| NUP205   | 1.6 | 2.04E-02 |
| BTAF1    | 1.6 | 1.43E-02 |
| EIF2AK3  | 1.6 | 3.01E-03 |
| ANXA2    | 1.6 | 1.42E-02 |
| BAZ1A    | 1.6 | 7.89E-03 |
| PDPN     | 1.6 | 4.98E-02 |
| ATF4     | 1.6 | 1.20E-02 |
| AARS     | 1.6 | 6.94E-03 |
| SACS     | 1.6 | 2.04E-02 |
| SEC61A1  | 1.6 | 9.70E-03 |
| SEL1L3   | 1.6 | 2.74E-02 |
| ZNF281   | 1.6 | 3.22E-03 |
| STK39    | 1.6 | 3.52E-03 |
| FZD6     | 1.6 | 5.05E-02 |
| CLIC2    | 1.6 | 2.84E-02 |
| FUT8     | 1.6 | 5.97E-03 |
| AOAH     | 1.6 | 5.28E-02 |
| ENTPD6   | 1.6 | 1.65E-02 |
| WISP1    | 1.6 | 5.23E-02 |
| SEL1L    | 1.6 | 4.20E-03 |
| SLC39A10 | 1.6 | 5.43E-02 |
| CASP3    | 1.6 | 2.55E-03 |
| PAWR     | 1.6 | 2.76E-04 |
| SERPINB1 | 1.6 | 3.13E-02 |
| ADAMTS7  | 1.6 | 3.54E-02 |
| ERLEC1   | 1.6 | 2.58E-02 |

|          |     |          |
|----------|-----|----------|
| C9       | 1.6 | 3.93E-02 |
| ALDOC    | 1.6 | 5.08E-02 |
| PPRC1    | 1.6 | 1.77E-02 |
| MIS18BP1 | 1.6 | 3.18E-02 |
| GOLGA3   | 1.6 | 2.64E-03 |
| IQGAP1   | 1.6 | 6.60E-03 |
| ZMYND19  | 1.6 | 3.44E-02 |
| TUBA1B   | 1.6 | 6.88E-03 |
| DOCK7    | 1.6 | 1.37E-02 |
| EPRS     | 1.6 | 3.45E-03 |
| CMAS     | 1.6 | 1.54E-02 |
| SLC7A1   | 1.6 | 1.25E-02 |
| FLVCR2   | 1.6 | 2.26E-02 |
| PGM2     | 1.6 | 7.93E-03 |
| VLDLR    | 1.6 | 1.87E-03 |
| COL5A2   | 1.6 | 1.79E-02 |
| S100A6   | 1.6 | 3.06E-02 |
| AP3S1    | 1.7 | 1.36E-03 |
| PTPN12   | 1.7 | 3.05E-04 |
| CCDC134  | 1.7 | 4.17E-02 |
| FOCAD    | 1.7 | 3.14E-03 |
| ABCE1    | 1.7 | 3.69E-03 |
| NAA15    | 1.7 | 1.71E-02 |
| PRKAA2   | 1.7 | 3.44E-02 |
| CARS     | 1.7 | 1.99E-03 |
| ARG2     | 1.7 | 3.31E-02 |
| SRP54    | 1.7 | 5.23E-03 |
| SELENOK  | 1.7 | 1.33E-03 |
| EIF4E    | 1.7 | 8.21E-03 |
| PLA2G4A  | 1.7 | 3.82E-02 |
| LTBP2    | 1.7 | 2.28E-02 |
| ARCN1    | 1.7 | 2.11E-03 |
| COPB2    | 1.7 | 6.68E-03 |
| MAPK6    | 1.7 | 1.13E-02 |
| UBE2S    | 1.7 | 1.08E-02 |
| P4HA2    | 1.7 | 5.38E-03 |
| CTNNB1   | 1.7 | 3.08E-03 |
| ITGAV    | 1.7 | 7.96E-03 |
| CDCA8    | 1.7 | 2.23E-02 |
| ATM      | 1.7 | 1.39E-03 |
| AMIGO3   | 1.7 | 2.55E-03 |
| TOPBP1   | 1.7 | 3.75E-03 |
| HSPD1    | 1.7 | 1.25E-02 |
| SLC20A1  | 1.7 | 1.63E-02 |
| GMPPB    | 1.7 | 8.21E-03 |
| SOX9     | 1.7 | 1.52E-02 |
| DNAJC25  | 1.7 | 1.46E-02 |
| SLC30A7  | 1.7 | 2.93E-03 |
| AMD1     | 1.7 | 3.24E-03 |
| BRCA2    | 1.7 | 3.63E-02 |
| THY1     | 1.7 | 1.92E-02 |
| SOAT1    | 1.7 | 1.57E-02 |
| BDP1     | 1.7 | 2.88E-03 |
| UFM1     | 1.7 | 5.37E-03 |
| MAP4K4   | 1.7 | 5.24E-04 |
| ADAMTS9  | 1.7 | 4.78E-02 |
| CASC4    | 1.7 | 1.90E-03 |
| RPS6KA3  | 1.7 | 1.07E-03 |
| MAN2A1   | 1.7 | 7.59E-03 |
| SLC2A1   | 1.7 | 7.88E-03 |
| TFPI2    | 1.7 | 5.42E-03 |
| SLC7A6   | 1.7 | 2.15E-03 |
| ATR      | 1.7 | 2.92E-02 |
| RPN2     | 1.7 | 7.02E-03 |
| CFI      | 1.7 | 4.15E-02 |
| SLC39A7  | 1.7 | 1.29E-03 |
| CBX5     | 1.7 | 9.86E-04 |
| F2RL2    | 1.7 | 1.57E-02 |
| PTGER2   | 1.7 | 1.84E-03 |
| HMMR     | 1.7 | 4.64E-02 |
| COPB1    | 1.7 | 7.69E-03 |
| COL4A1   | 1.7 | 1.53E-02 |
| BUB1     | 1.7 | 5.12E-02 |
| E2F7     | 1.7 | 5.49E-02 |

|           |     |          |
|-----------|-----|----------|
| C3        | 1.7 | 3.10E-02 |
| TMED5     | 1.7 | 4.92E-04 |
| SPATS2    | 1.7 | 8.34E-04 |
| SAMSN1    | 1.7 | 1.38E-02 |
| TNFRSF11A | 1.7 | 3.61E-02 |
| GALNT6    | 1.7 | 1.20E-02 |
| DUSP5     | 1.7 | 1.26E-02 |
| SPC24     | 1.7 | 5.41E-02 |
| BTG2      | 1.7 | 9.85E-03 |
| TMED10    | 1.7 | 1.41E-04 |
| GRAP      | 1.7 | 2.12E-02 |
| TOP2A     | 1.7 | 2.46E-02 |
| NSDHL     | 1.7 | 4.11E-03 |
| COL6A3    | 1.8 | 3.31E-02 |
| CHORDC1   | 1.8 | 1.47E-02 |
| ADM       | 1.8 | 2.21E-02 |
| OSBPL8    | 1.8 | 5.05E-02 |
| SKA2      | 1.8 | 1.91E-02 |
| GARS      | 1.8 | 7.19E-04 |
| TIFA      | 1.8 | 7.65E-03 |
| STEAP2    | 1.8 | 2.56E-02 |
| ECSCR     | 1.8 | 2.28E-02 |
| SLC38A2   | 1.8 | 2.90E-02 |
| NUDCD1    | 1.8 | 6.46E-03 |
| SSR1      | 1.8 | 8.41E-04 |
| TPX2      | 1.8 | 1.13E-02 |
| MTHFD2    | 1.8 | 2.97E-03 |
| TMED7     | 1.8 | 7.76E-04 |
| SC5D      | 1.8 | 3.28E-03 |
| MMP19     | 1.8 | 4.54E-02 |
| CCT6A     | 1.8 | 4.24E-04 |
| POLE      | 1.8 | 9.67E-03 |
| CCND2     | 1.8 | 5.04E-03 |
| CHEK2     | 1.8 | 3.88E-03 |
| TNFSF15   | 1.8 | 2.54E-02 |
| MIS18A    | 1.8 | 5.06E-02 |
| SRGN      | 1.8 | 2.61E-03 |
| MCTP2     | 1.8 | 1.96E-03 |
| ERN2      | 1.8 | 1.38E-02 |
| FGR       | 1.8 | 2.10E-02 |
| PGK1      | 1.8 | 1.24E-03 |
| MARS      | 1.8 | 4.34E-05 |
| SLC16A10  | 1.8 | 3.61E-02 |
| SLC3A2    | 1.8 | 1.83E-03 |
| KLF15     | 1.8 | 3.84E-02 |
| ACOT11    | 1.8 | 5.31E-02 |
| CD24      | 1.8 | 4.34E-02 |
| FAM20C    | 1.8 | 4.61E-03 |
| KRT80     | 1.8 | 4.15E-02 |
| TNFRSF10B | 1.8 | 3.08E-03 |
| ARF2      | 1.8 | 2.80E-03 |
| SLC30A5   | 1.8 | 1.03E-03 |
| TSPAN12   | 1.8 | 3.52E-04 |
| THBD      | 1.8 | 2.09E-02 |
| INTS2     | 1.8 | 3.06E-03 |
| SEC61G    | 1.8 | 4.85E-03 |
| DNA2      | 1.8 | 2.59E-02 |
| GADD45A   | 1.8 | 2.23E-02 |
| CD69      | 1.8 | 3.37E-02 |
| ARF4      | 1.8 | 1.02E-03 |
| SERP1     | 1.8 | 4.79E-04 |
| SLC1A5    | 1.8 | 8.53E-04 |
| IGJ       | 1.8 | 2.63E-02 |
| TSPAN13   | 1.8 | 1.66E-03 |
| IFRD1     | 1.8 | 2.25E-03 |
| CCDC88B   | 1.8 | 1.78E-03 |
| SLC6A9    | 1.8 | 1.29E-02 |
| WFS1      | 1.9 | 1.20E-03 |
| KIF5B     | 1.9 | 3.90E-03 |
| GNE       | 1.9 | 2.36E-03 |
| YARS2     | 1.9 | 2.28E-02 |
| DHCR7     | 1.9 | 3.19E-04 |
| PFKFB2    | 1.9 | 3.58E-02 |
| SELENOM   | 1.9 | 2.48E-03 |

|          |     |          |
|----------|-----|----------|
| FDFT1    | 1.9 | 3.52E-04 |
| HMGCR    | 1.9 | 1.25E-03 |
| STT3A    | 1.9 | 1.19E-03 |
| SULF2    | 1.9 | 2.64E-02 |
| CALR     | 1.9 | 2.48E-03 |
| ETV5     | 1.9 | 2.26E-02 |
| CDC25C   | 1.9 | 6.70E-03 |
| HSP90AA1 | 1.9 | 2.84E-02 |
| METTL16  | 1.9 | 2.84E-02 |
| PPIB     | 1.9 | 7.19E-04 |
| PANK1    | 1.9 | 9.77E-03 |
| CXCR4    | 1.9 | 1.45E-02 |
| SLC23A1  | 1.9 | 3.44E-03 |
| HSPA8    | 1.9 | 3.54E-02 |
| ITGA1    | 1.9 | 3.71E-02 |
| BLM      | 1.9 | 1.56E-02 |
| SKIL     | 1.9 | 3.19E-05 |
| SERPINB5 | 1.9 | 8.72E-03 |
| DNAJC10  | 1.9 | 4.24E-04 |
| SPRED1   | 1.9 | 3.24E-05 |
| SLC7A2   | 1.9 | 4.15E-02 |
| CD163    | 1.9 | 4.34E-02 |
| DSE      | 1.9 | 4.61E-03 |
| EDEM3    | 1.9 | 1.53E-02 |
| LRRC59   | 1.9 | 1.99E-03 |
| ADGRG6   | 1.9 | 2.65E-03 |
| MIA3     | 1.9 | 1.23E-04 |
| PKM      | 1.9 | 3.11E-04 |
| ECM1     | 1.9 | 4.06E-03 |
| HELLS    | 1.9 | 4.19E-03 |
| GALNT7   | 1.9 | 5.18E-04 |
| MVD      | 1.9 | 2.48E-04 |
| RRM2     | 1.9 | 2.76E-04 |
| MCM6     | 1.9 | 3.68E-04 |
| FNDC3B   | 1.9 | 4.00E-03 |
| SHMT2    | 2.0 | 2.65E-05 |
| FOXA1    | 2.0 | 6.53E-03 |
| SREBF1   | 2.0 | 1.67E-04 |
| ECT2     | 2.0 | 1.69E-02 |
| SERPINH1 | 2.0 | 7.17E-03 |
| ST7      | 2.0 | 4.61E-03 |
| MMD      | 2.0 | 9.89E-04 |
| EDEM1    | 2.0 | 5.13E-05 |
| ABCA5    | 2.0 | 4.93E-03 |
| WNT5A    | 2.0 | 2.03E-02 |
| OSMR     | 2.0 | 1.41E-04 |
| XBP1     | 2.0 | 2.73E-04 |
| IL17RD   | 2.0 | 2.03E-02 |
| DDIT4    | 2.0 | 1.40E-04 |
| ATOX1    | 2.0 | 3.87E-03 |
| AACS     | 2.0 | 4.99E-05 |
| RIPK3    | 2.0 | 5.75E-04 |
| ACSL3    | 2.0 | 8.07E-05 |
| BST1     | 2.0 | 9.80E-04 |
| PLSCR4   | 2.0 | 4.20E-03 |
| ASNSD1   | 2.0 | 1.71E-03 |
| KIF23    | 2.0 | 5.38E-03 |
| IL33     | 2.0 | 9.72E-04 |
| PCK2     | 2.0 | 1.77E-03 |
| CYP51A1  | 2.1 | 1.08E-04 |
| TARS     | 2.1 | 7.29E-05 |
| SLC35A3  | 2.1 | 3.51E-03 |
| WLS      | 2.1 | 7.12E-04 |
| CEBPB    | 2.1 | 3.29E-03 |
| CFB      | 2.1 | 1.92E-02 |
| WNT9B    | 2.1 | 3.98E-02 |
| SEC24D   | 2.1 | 2.38E-06 |
| DNAJA1   | 2.1 | 4.93E-03 |
| SEC11C   | 2.1 | 2.82E-04 |
| ANKRD12  | 2.1 | 1.18E-03 |
| RRBP1    | 2.1 | 1.96E-04 |
| COL12A1  | 2.1 | 1.41E-04 |
| MEST     | 2.1 | 4.67E-02 |
| TMED3    | 2.1 | 3.45E-03 |

|           |     |          |
|-----------|-----|----------|
| AFF2      | 2.1 | 2.84E-02 |
| PGM3      | 2.1 | 7.37E-05 |
| GPR19     | 2.1 | 2.11E-02 |
| COL7A1    | 2.1 | 1.26E-03 |
| ADGRE2    | 2.1 | 2.00E-02 |
| ANXA5     | 2.1 | 1.44E-05 |
| CDH1      | 2.1 | 1.78E-04 |
| PROCR     | 2.1 | 1.02E-02 |
| SELENOS   | 2.1 | 1.21E-05 |
| FASN      | 2.1 | 1.09E-04 |
| DNAJC3    | 2.1 | 2.07E-05 |
| CD14      | 2.1 | 1.23E-02 |
| PIK3C2A   | 2.1 | 1.70E-03 |
| CTGF      | 2.1 | 2.04E-02 |
| AREG      | 2.1 | 2.09E-02 |
| IRF4      | 2.1 | 2.55E-03 |
| CSRP2     | 2.1 | 1.90E-04 |
| ZGRF1     | 2.1 | 7.88E-03 |
| TMEM38B   | 2.1 | 1.48E-03 |
| ACLY      | 2.2 | 5.17E-06 |
| SLC41A2   | 2.2 | 5.17E-02 |
| GINS1     | 2.2 | 2.93E-03 |
| STC1      | 2.2 | 1.42E-02 |
| KIAA0101  | 2.2 | 1.07E-03 |
| LSS       | 2.2 | 1.54E-05 |
| FICD      | 2.2 | 1.96E-04 |
| PANK3     | 2.2 | 4.27E-02 |
| DEPDC1    | 2.2 | 2.26E-02 |
| MYOF      | 2.2 | 3.03E-05 |
| CD79A     | 2.2 | 1.05E-02 |
| SLC5A1    | 2.2 | 2.73E-04 |
| LIPH      | 2.2 | 2.78E-04 |
| FDPS      | 2.2 | 8.28E-05 |
| TNFRSF26  | 2.2 | 5.68E-04 |
| GFPT1     | 2.2 | 1.21E-05 |
| SLC17A9   | 2.2 | 1.07E-05 |
| DERL3     | 2.2 | 2.74E-04 |
| DIAPH3    | 2.2 | 2.40E-02 |
| SH2D1B    | 2.2 | 5.04E-02 |
| CDR2      | 2.2 | 1.11E-04 |
| LOXL4     | 2.2 | 3.47E-02 |
| ADM5      | 2.2 | 5.60E-03 |
| ITGA8     | 2.2 | 1.15E-04 |
| OLFM4     | 2.2 | 1.48E-02 |
| TGM2      | 2.2 | 3.66E-05 |
| SPDL1     | 2.3 | 2.87E-02 |
| KNL1      | 2.3 | 4.26E-03 |
| FCGBP     | 2.3 | 2.08E-02 |
| IL18      | 2.3 | 7.08E-03 |
| PHLDA1    | 2.3 | 3.66E-04 |
| TNFAIP6   | 2.3 | 2.84E-02 |
| VSTM1     | 2.3 | 1.95E-02 |
| PTGER1    | 2.3 | 1.21E-02 |
| PTGS1     | 2.3 | 9.54E-06 |
| GPBR1     | 2.3 | 1.39E-02 |
| FFAR4     | 2.3 | 1.81E-02 |
| MKX       | 2.3 | 2.40E-02 |
| HYOU1     | 2.3 | 4.56E-05 |
| HSD11B1   | 2.3 | 7.62E-03 |
| PDIA4     | 2.3 | 1.15E-04 |
| CCL28     | 2.3 | 4.92E-03 |
| CHIA      | 2.3 | 3.56E-02 |
| BCAT1     | 2.4 | 4.81E-04 |
| PTPRN2    | 2.4 | 2.45E-02 |
| ADAM32    | 2.4 | 1.08E-02 |
| DEPDC7    | 2.4 | 4.79E-02 |
| SFRP1     | 2.4 | 2.73E-04 |
| SMOC2     | 2.4 | 3.44E-03 |
| SCNN1D    | 2.4 | 1.45E-02 |
| PDZK1IP1L | 2.4 | 4.24E-02 |
| GJA1      | 2.4 | 6.11E-05 |
| BMP7      | 2.4 | 6.17E-05 |
| HIF1A     | 2.4 | 9.56E-06 |
| SLC15A2   | 2.4 | 2.11E-03 |

|              |     |          |
|--------------|-----|----------|
| NFIL3        | 2.4 | 3.14E-09 |
| CDK1         | 2.4 | 1.89E-03 |
| TNFRSF6B     | 2.4 | 4.77E-03 |
| FGF2         | 2.4 | 5.70E-04 |
| TRIB3        | 2.4 | 1.05E-02 |
| CHEK1        | 2.4 | 3.35E-03 |
| AHNAK2       | 2.4 | 4.81E-02 |
| NDUFA4L2     | 2.4 | 1.77E-03 |
| FADS1        | 2.4 | 6.98E-08 |
| TIGIT        | 2.5 | 3.55E-03 |
| ATF5         | 2.5 | 2.26E-02 |
| GABRD        | 2.5 | 4.65E-02 |
| FOS          | 2.5 | 2.09E-02 |
| PRDX4        | 2.5 | 3.41E-05 |
| ATP13A3      | 2.5 | 7.31E-03 |
| IFIT1L1      | 2.5 | 3.82E-02 |
| HSPH1        | 2.5 | 1.97E-02 |
| SLC1A4       | 2.5 | 1.36E-03 |
| LMAN1        | 2.5 | 3.59E-06 |
| SHCBP1       | 2.5 | 1.06E-03 |
| AHSA2        | 2.5 | 3.80E-05 |
| MSMO1        | 2.5 | 5.94E-06 |
| SMC2         | 2.5 | 1.70E-04 |
| "MARCH3"     | 2.5 | 5.78E-04 |
| SNORA63      | 2.5 | 4.32E-02 |
| SOCS3        | 2.5 | 1.07E-03 |
| LAMB3        | 2.5 | 2.26E-06 |
| CCR2         | 2.5 | 2.63E-03 |
| EGF          | 2.5 | 1.10E-03 |
| SLC16A3      | 2.6 | 1.23E-03 |
| EBP          | 2.6 | 1.17E-05 |
| NT5DC2       | 2.6 | 1.65E-05 |
| ADAM9        | 2.6 | 1.62E-07 |
| RBPJL        | 2.6 | 1.02E-02 |
| ROS1         | 2.6 | 3.77E-02 |
| ITGA2        | 2.6 | 3.66E-05 |
| ADAMTS4      | 2.6 | 4.92E-03 |
| IGFBP4       | 2.6 | 2.53E-05 |
| KRT18        | 2.6 | 4.34E-05 |
| LOC102161685 | 2.7 | 3.95E-04 |
| MYBL1        | 2.7 | 2.28E-02 |
| BDNF         | 2.7 | 1.64E-02 |
| HSD17B7      | 2.7 | 9.57E-06 |
| PPP2R5E      | 2.7 | 2.55E-02 |
| HSP90B1      | 2.7 | 1.17E-05 |
| ELOVL6       | 2.7 | 1.65E-05 |
| SNCA         | 2.7 | 1.40E-02 |
| SLC7A5       | 2.7 | 7.21E-06 |
| ABAT         | 2.7 | 2.61E-02 |
| CSF3R        | 2.7 | 1.81E-02 |
| TFF3         | 2.7 | 2.49E-03 |
| MANF         | 2.7 | 6.81E-06 |
| CXCR1        | 2.7 | 1.71E-02 |
| IGLL5L       | 2.7 | 7.30E-03 |
| SERPINB8     | 2.7 | 2.47E-05 |
| GCNT3        | 2.7 | 1.21E-03 |
| PNP          | 2.8 | 6.81E-06 |
| FADS2        | 2.8 | 2.38E-06 |
| PHLDA2       | 2.8 | 4.07E-04 |
| TFRC         | 2.8 | 3.47E-05 |
| SPHK1        | 2.8 | 3.05E-03 |
| STARD4       | 2.8 | 1.65E-06 |
| GPAT3        | 2.8 | 1.40E-04 |
| CXCR2        | 2.8 | 2.64E-02 |
| LDLR         | 2.8 | 1.77E-06 |
| UGGT1        | 2.9 | 5.68E-03 |
| TNC          | 2.9 | 8.70E-04 |
| SQLE         | 2.9 | 7.52E-07 |
| CXCL1        | 2.9 | 1.56E-02 |
| ETV4         | 2.9 | 3.43E-04 |
| ADAM20L2     | 2.9 | 2.39E-05 |
| IL1RAP       | 2.9 | 2.14E-03 |
| SNORA20E     | 2.9 | 4.65E-02 |
| LCN2         | 3.0 | 1.80E-02 |

|           |     |          |
|-----------|-----|----------|
| BAALC     | 3.0 | 5.32E-04 |
| SEMA7A    | 3.0 | 1.23E-05 |
| MIR9829   | 3.0 | 5.30E-02 |
| SLC1A2    | 3.0 | 2.04E-03 |
| TLE6      | 3.0 | 6.63E-03 |
| FFAR2     | 3.0 | 5.18E-04 |
| SHISA8    | 3.0 | 2.45E-02 |
| HSPA5     | 3.0 | 1.21E-05 |
| B3GNT6    | 3.0 | 2.31E-03 |
| SLCO4A1   | 3.1 | 7.29E-05 |
| SERPINE2  | 3.1 | 1.06E-04 |
| DHRS9     | 3.1 | 4.24E-04 |
| IDI1      | 3.1 | 3.39E-06 |
| INSIG1    | 3.1 | 6.97E-07 |
| C4BPB     | 3.1 | 5.70E-06 |
| FGF7      | 3.2 | 4.44E-05 |
| CLCA1     | 3.2 | 1.07E-03 |
| PFKFB3    | 3.2 | 4.64E-06 |
| IL13RA2   | 3.3 | 5.25E-02 |
| POU2AF1   | 3.3 | 9.54E-06 |
| CTSG      | 3.3 | 1.58E-02 |
| NKX2-2    | 3.3 | 5.22E-03 |
| CBS       | 3.4 | 1.61E-03 |
| SLC2A3    | 3.4 | 1.42E-12 |
| CXCL8     | 3.4 | 5.32E-04 |
| MMP3      | 3.5 | 3.34E-02 |
| ACAT2     | 3.5 | 1.27E-10 |
| SLC12A8   | 3.5 | 7.40E-04 |
| CXCL14    | 3.5 | 9.85E-08 |
| SPHKAP    | 3.5 | 8.66E-04 |
| TIAM1     | 3.5 | 2.62E-05 |
| RAET1EL3  | 3.6 | 4.51E-03 |
| SYNE4     | 3.6 | 2.31E-02 |
| PLA2G3    | 3.6 | 7.51E-05 |
| ITLN2L*   | 3.6 | 2.78E-02 |
| CLEC10A   | 3.6 | 2.24E-02 |
| HHIPL1    | 3.6 | 1.65E-05 |
| IL1A      | 3.6 | 1.30E-03 |
| CMAH      | 3.7 | 4.42E-02 |
| MYOM3     | 3.7 | 1.26E-03 |
| GPRC5D    | 3.7 | 4.11E-02 |
| KLRG2     | 3.7 | 4.54E-02 |
| MED12L    | 3.8 | 5.39E-05 |
| TGM1      | 3.8 | 3.08E-02 |
| ARNTL2    | 3.8 | 6.51E-06 |
| HMGCS1    | 3.9 | 7.11E-09 |
| SCD       | 3.9 | 9.81E-07 |
| SHANK2    | 3.9 | 1.44E-03 |
| MS4A7     | 3.9 | 2.55E-03 |
| WNT2      | 3.9 | 6.32E-03 |
| LIPG      | 4.0 | 1.77E-03 |
| STEAP4    | 4.0 | 5.38E-03 |
| BDKRB1    | 4.0 | 1.65E-03 |
| COL8A1    | 4.1 | 1.19E-06 |
| HEPHL1    | 4.1 | 5.31E-02 |
| ABCA12    | 4.1 | 1.91E-03 |
| IL26      | 4.1 | 2.96E-03 |
| SFTPD     | 4.1 | 2.73E-02 |
| ADAM12    | 4.2 | 4.78E-04 |
| TAT       | 4.2 | 4.00E-02 |
| CA4       | 4.3 | 9.18E-05 |
| TIMP1     | 4.3 | 2.48E-09 |
| NRG1      | 4.3 | 8.21E-05 |
| LRP2      | 4.3 | 1.38E-02 |
| C4BPA     | 4.3 | 1.37E-03 |
| P4HA3     | 4.4 | 3.89E-04 |
| SPDEF     | 4.4 | 3.89E-06 |
| OSM       | 4.4 | 1.92E-04 |
| F13A1     | 4.4 | 1.41E-09 |
| WAP1      | 4.4 | 5.33E-03 |
| KIAA1199  | 4.6 | 4.92E-03 |
| IGFBP2    | 4.6 | 3.68E-07 |
| PLAUR     | 4.6 | 3.65E-06 |
| TNFRSF11B | 4.6 | 1.51E-04 |

|           |      |          |
|-----------|------|----------|
| RN7SL1    | 4.6  | 2.45E-02 |
| ANKRD26L3 | 4.6  | 3.02E-02 |
| CAPNS2    | 4.7  | 3.43E-04 |
| COL28A1   | 4.7  | 5.24E-04 |
| SERPINA1  | 4.7  | 5.81E-03 |
| PI3       | 4.7  | 1.63E-02 |
| SLC4A11   | 4.8  | 5.93E-03 |
| RNF39     | 4.8  | 2.65E-05 |
| IGHE      | 5.0  | 2.59E-06 |
| TNFRSF12A | 5.0  | 6.86E-10 |
| CENPE     | 5.0  | 4.28E-03 |
| PHGDH     | 5.1  | 3.92E-05 |
| CCL23     | 5.1  | 1.56E-04 |
| NPPC      | 5.1  | 3.89E-03 |
| MUC2      | 5.2  | 7.10E-08 |
| CXCL6     | 5.3  | 2.39E-05 |
| AQP9      | 5.3  | 1.56E-02 |
| ITGB6     | 5.4  | 8.74E-11 |
| IL1B      | 5.5  | 1.20E-03 |
| GZMB      | 5.5  | 2.79E-04 |
| SDS       | 5.6  | 1.53E-02 |
| NXPH4     | 5.6  | 3.16E-05 |
| NEUROG3   | 5.7  | 1.61E-03 |
| IGH@      | 5.7  | 2.70E-05 |
| MPTX      | 5.8  | 4.12E-06 |
| CHI3L2    | 6.0  | 7.37E-04 |
| ADAM20L6  | 6.1  | 2.85E-02 |
| TREM1     | 6.4  | 4.61E-03 |
| SLC6A13   | 6.5  | 1.54E-02 |
| AGR2      | 6.5  | 1.79E-05 |
| IL6       | 6.5  | 1.29E-04 |
| PTGS2     | 6.5  | 8.39E-06 |
| DIO2      | 6.5  | 3.02E-04 |
| SPINK4    | 6.6  | 2.11E-06 |
| ADAMTS16  | 6.6  | 2.55E-03 |
| BPIFB2    | 6.7  | 2.43E-03 |
| AKR1C1    | 7.0  | 5.11E-02 |
| C1QL2     | 7.0  | 4.51E-02 |
| CRLF1     | 7.1  | 3.16E-05 |
| PSAT1     | 7.2  | 3.12E-04 |
| TNIP3     | 7.3  | 4.56E-05 |
| MCPT3*    | 7.3  | 2.80E-02 |
| COL26A1   | 7.3  | 2.71E-04 |
| HOXD1     | 7.4  | 6.83E-03 |
| S100A2    | 7.4  | 9.54E-06 |
| MMP20     | 7.4  | 4.14E-02 |
| ADM2      | 7.9  | 1.29E-05 |
| S100A3    | 8.0  | 6.29E-03 |
| RHCG      | 8.0  | 4.93E-02 |
| FAM71E2   | 8.2  | 9.06E-03 |
| F3        | 8.2  | 7.74E-11 |
| HK2       | 8.6  | 2.40E-06 |
| SCGB3A1   | 8.8  | 1.90E-02 |
| MMP9      | 8.9  | 1.02E-08 |
| MMP1      | 9.4  | 4.44E-05 |
| SERPINB2  | 9.8  | 2.12E-04 |
| SNORA20   | 9.8  | 2.20E-03 |
| SLC7A11   | 9.9  | 9.13E-04 |
| KLRJ1     | 10.0 | 5.18E-04 |
| RETNLB    | 10.1 | 2.14E-03 |
| IL1R2     | 10.3 | 2.46E-06 |
| SNORA73AL | 10.5 | 2.14E-02 |
| PRG4      | 10.7 | 1.39E-02 |
| UPK1B     | 10.9 | 1.66E-08 |
| PADI4     | 11.0 | 7.93E-03 |
| BPIFB6    | 11.0 | 4.32E-02 |
| SERPINB11 | 11.3 | 9.04E-04 |
| PCSK9     | 11.5 | 5.33E-09 |
| SLC5A8    | 11.9 | 4.56E-05 |
| CYP7A1    | 12.7 | 4.64E-02 |
| LYZ       | 13.0 | 7.77E-03 |
| HCAR2     | 13.3 | 7.26E-04 |
| SULT2A1   | 13.4 | 4.28E-02 |
| CLEC4D    | 13.4 | 4.10E-02 |

|            |       |          |
|------------|-------|----------|
| CHI3L1     | 13.9  | 2.38E-06 |
| REG4       | 15.8  | 2.97E-08 |
| MAGEA13P   | 15.8  | 1.76E-02 |
| MCHR1      | 17.9  | 7.59E-03 |
| SERPINB7   | 19.3  | 1.85E-02 |
| IL11       | 19.4  | 3.58E-04 |
| MMP13      | 20.2  | 1.77E-06 |
| ANXA8      | 21.8  | 2.21E-07 |
| IL36A      | 22.7  | 3.90E-04 |
| XDH        | 22.8  | 3.03E-02 |
| CHIT1      | 24.2  | 1.65E-02 |
| TFF2       | 25.1  | 3.57E-02 |
| MMP8       | 27.1  | 7.94E-03 |
| CLDN9      | 27.7  | 5.43E-02 |
| IGHG1      | 29.1  | 1.93E-04 |
| CLEC18A    | 29.5  | 7.94E-03 |
| MMP7       | 33.4  | 3.22E-03 |
| AQP5       | 33.5  | 4.54E-04 |
| S100A8     | 38.3  | 5.18E-04 |
| S100A12    | 38.4  | 4.48E-04 |
| SDSL       | 39.6  | 1.38E-02 |
| A3GALT2    | 40.6  | 5.54E-03 |
| NTRK1      | 42.0  | 2.62E-07 |
| S100A9     | 44.8  | 2.59E-04 |
| SPINK6     | 46.2  | 5.38E-03 |
| LTF        | 52.9  | 5.95E-03 |
| TCN1       | 54.1  | 1.15E-04 |
| PADI3      | 55.7  | 1.75E-02 |
| SERPINA3-2 | 60.8  | 2.96E-06 |
| TNN        | 61.3  | 4.18E-05 |
| AVPR1B     | 62.6  | 5.42E-03 |
| GNLY       | 68.8  | 2.42E-09 |
| MMP12      | 101.0 | 2.26E-14 |
| SCGB2A2    | 105.1 | 3.14E-07 |
| ARG1       | 122.6 | 4.56E-05 |
| IL4I1L     | 161.2 | 3.98E-05 |
| REG3A      | 275.6 | 2.48E-03 |
| PADI1      | 296.4 | 3.51E-03 |
| TFF1       | 705.1 | 2.48E-05 |
