# Supplementary material for: Molecular and metabolomic changes in the proximal colon of pigs infected with Trichuris suis
Source: PubMed Central journal article supplement (PMC7393168; doi:10.1038/s41598-020-69462-5), 2020-07-30
Supplement: 41598_2020_69462_MOESM6_ESM.pdf [file 41598_2020_69462_MOESM6_ESM.pdf]

**Molecular and metabolomic changes in the proximal colon of pigs infected with *Trichuris suis***

Harry Dawson<sup>1</sup>, Celine Chen<sup>1</sup>, Robert Li<sup>2</sup>, Lauren Nicki Bell<sup>3</sup>, Terez Shea-Donohue<sup>4</sup>, Helene Kringel<sup>5</sup>, Ethiopia Beshah<sup>1</sup>, Dolores E. Hill<sup>2</sup>, Joseph F. Urban Jr<sup>1,2</sup>.

<sup>1</sup>United States Department of Agriculture, Agricultural Research Service, Northeast Area, Beltsville Human Nutrition Research Center, Diet Genomics and Immunology Laboratory, <sup>2</sup> Beltsville Agricultural Research Center, Animal Parasitology Disease Laboratory, Beltsville, MD; <sup>3</sup>Metabolon, Inc., Morrisville, NC; <sup>4</sup>University of Maryland School of Medicine, Baltimore, MD, USA; <sup>5</sup>Department of Veterinary Disease Biology, Faculty of Health and Medical Sciences, University of Copenhagen, Copenhagen, Denmark

Supplemental Table S6

Supplemental Table S6. Comparison of DEGs expressed at 52 days after inoculation in pigs infected with *Trichuris suis* with no worms (worm-free) versus those with worm.

| Feature ID | Fold change | EDGE test: FDR p-value correction |
|------------|-------------|-----------------------------------|
| SLC10A2    | -297.1      | 1.18E-04                          |
| ALPI       | -32.9       | 4.94E-06                          |
| ALDOB      | -21.0       | 1.66E-06                          |
| BTNL2      | -19.6       | 1.37E-02                          |
| AQP8       | -15.1       | 2.08E-03                          |
| NXPE2      | -13.8       | 2.92E-05                          |
| THAP12     | -13.4       | 2.27E-02                          |
| CLCA4      | -13.2       | 2.57E-05                          |
| HMGCS2     | -12.8       | 0.00E+00                          |
| OASL       | -12.1       | 1.20E-02                          |
| SLC26A3    | -12.0       | 9.52E-08                          |
| FRMD1      | -9.6        | 1.51E-03                          |
| FOXO6      | -9.1        | 1.78E-04                          |
| NR1H4      | -7.6        | 1.96E-06                          |
| GSTA2      | -7.4        | 7.07E-03                          |
| CYP2B22    | -6.8        | 5.35E-03                          |
| SLC30A10   | -6.3        | 2.38E-02                          |
| SI         | -6.1        | 2.79E-02                          |
| COL6A6     | -5.7        | 3.03E-06                          |
| CXCL9      | -5.7        | 3.65E-03                          |
| DACT2      | -5.4        | 1.74E-02                          |
| PCK1       | -5.4        | 1.48E-03                          |
| PADI2      | -5.2        | 1.54E-06                          |
| HAS3       | -5.2        | 5.01E-04                          |
| SULT1E1    | -5.2        | 7.10E-07                          |
| GUCA2A     | -5.1        | 1.44E-04                          |
| MOGAT2     | -4.9        | 2.97E-02                          |
| NCR2       | -4.8        | 1.35E-02                          |
| SLC51A     | -4.8        | 3.48E-06                          |
| SSTR5      | -4.8        | 1.30E-02                          |
| CYP26B1    | -4.6        | 4.16E-08                          |
| ABCA6      | -4.4        | 1.88E-04                          |
| SLC16A1    | -4.4        | 0.00E+00                          |
| CXCL10     | -4.4        | 7.18E-03                          |
| RSAD2      | -4.3        | 2.28E-02                          |
| AGT        | -4.3        | 4.12E-03                          |
| SLC25A34   | -4.2        | 1.12E-05                          |
| GABRB2     | -4.0        | 1.45E-04                          |
| TM6SF2     | -4.0        | 1.95E-09                          |
| IFI27      | -3.9        | 1.12E-02                          |
| CA1        | -3.9        | 1.38E-08                          |
| P2RX3      | -3.9        | 4.22E-03                          |
| ABCG2      | -3.4        | 2.49E-03                          |
| WNT8B      | -3.1        | 1.99E-03                          |
| CA12       | -3.1        | 2.51E-06                          |
| SLC38A4    | -3.0        | 3.10E-03                          |
| SELENBP1   | -3.0        | 1.73E-07                          |
| PARP15     | -3.0        | 6.17E-03                          |
| CHP2       | -2.9        | 5.14E-05                          |
| CNTFR      | -2.9        | 3.11E-03                          |
| CTBS       | -2.9        | 4.10E-02                          |
| CLDN10     | -2.8        | 4.58E-02                          |
| CXCL12     | -2.8        | 2.48E-04                          |
| SCN2A      | -2.7        | 4.98E-02                          |
| ABCA9      | -2.7        | 5.24E-02                          |
| PRSS12     | -2.7        | 9.44E-04                          |
| XCL1       | -2.7        | 5.72E-03                          |
| ABCA8      | -2.7        | 4.77E-02                          |
| GRIK4      | -2.7        | 9.60E-03                          |
| IFI44      | -2.7        | 2.55E-02                          |
| DHX58      | -2.7        | 3.59E-02                          |
| IRF4L      | -2.7        | 3.39E-02                          |
| CCL8       | -2.6        | 7.80E-03                          |
| LYPD6      | -2.6        | 3.08E-02                          |
| AHRR       | -2.6        | 6.47E-04                          |
| HOXD10     | -2.6        | 1.40E-03                          |
| UGT2C1     | -2.5        | 1.18E-05                          |
| FBXO32     | -2.5        | 2.94E-04                          |
| HS3ST3A1   | -2.5        | 4.16E-02                          |
| UBE2L6     | -2.5        | 1.39E-04                          |
| ZBP1       | -2.5        | 1.11E-02                          |
| FOXS1      | -2.5        | 5.82E-03                          |
| ABI3BP     | -2.5        | 1.33E-03                          |
| PTPRD      | -2.5        | 2.63E-04                          |
| CD36       | -2.4        | 7.42E-05                          |
| CD300C     | -2.4        | 8.64E-04                          |
| SLC24A4    | -2.4        | 1.05E-02                          |
| LILRB3L4   | -2.4        | 5.21E-02                          |

|           |      |          |
|-----------|------|----------|
| MAMDC2    | -2.4 | 6.26E-03 |
| GBP2      | -2.4 | 9.65E-03 |
| AOC1      | -2.4 | 4.46E-05 |
| FABP1     | -2.4 | 1.03E-02 |
| FCER1A    | -2.3 | 3.53E-02 |
| SELENOP   | -2.3 | 5.83E-05 |
| SLC7A3L7* | -2.3 | 4.90E-02 |
| NT5E      | -2.3 | 4.92E-03 |
| C11orf86  | -2.2 | 2.08E-03 |
| SEMA3A    | -2.2 | 1.38E-02 |
| SECTM1    | -2.2 | 4.77E-02 |
| PRDX6     | -2.2 | 5.44E-05 |
| CARD14    | -2.2 | 2.07E-03 |
| IGF2      | -2.2 | 2.80E-02 |
| TLR8      | -2.2 | 2.49E-03 |
| SLC7A8    | -2.1 | 5.64E-03 |
| GBP6      | -2.1 | 3.20E-02 |
| AHCYL2    | -2.1 | 5.97E-05 |
| CTSW      | -2.1 | 1.42E-02 |
| DBP       | -2.1 | 1.42E-02 |
| PARP14    | -2.1 | 6.98E-03 |
| SLA-DRA   | -2.1 | 5.53E-03 |
| SLC25A42  | -2.1 | 7.36E-03 |
| GLI2      | -2.1 | 7.08E-03 |
| MPEG1     | -2.1 | 5.72E-03 |
| ANK3      | -2.1 | 2.79E-02 |
| SLC7A3L4* | -2.1 | 4.13E-02 |
| EDIL3     | -2.1 | 5.28E-03 |
| CD209     | -2.1 | 3.13E-02 |
| IL34      | -2.1 | 4.12E-03 |
| RYR2      | -2.0 | 2.80E-03 |
| KLRG1     | -2.0 | 4.23E-02 |
| CYP7B1    | -2.0 | 1.59E-02 |
| TXNIP     | -2.0 | 3.65E-03 |
| ADRB1     | -2.0 | 7.57E-03 |
| CD4       | -2.0 | 1.03E-02 |
| SLA-DRB1  | -2.0 | 1.25E-02 |
| ALDH1A3   | -2.0 | 1.10E-02 |
| GBP1      | -2.0 | 4.04E-02 |
| SLA-DQA1  | -2.0 | 1.33E-02 |
| IFI44L    | -2.0 | 1.59E-02 |
| P2RY13    | -2.0 | 1.81E-02 |
| CD74      | -2.0 | 7.72E-03 |
| ACE       | -2.0 | 6.94E-03 |
| ABCB1     | -2.0 | 7.10E-03 |
| PARP9     | -1.9 | 1.04E-03 |
| PCSK6     | -1.9 | 2.26E-04 |
| ANKH      | -1.9 | 4.54E-02 |
| HOXD11    | -1.9 | 5.02E-02 |
| GGT1      | -1.9 | 4.29E-02 |
| MAF       | -1.9 | 1.80E-03 |
| EGFLAM    | -1.9 | 5.37E-03 |
| CAVIN2    | -1.9 | 9.17E-03 |
| SYNPO     | -1.9 | 3.13E-03 |
| MS4A2     | -1.9 | 2.34E-02 |
| ADAMTS8   | -1.9 | 1.07E-02 |
| COLEC12   | -1.9 | 7.57E-03 |
| LY9L1*    | -1.9 | 1.61E-02 |
| CST3      | -1.9 | 7.80E-03 |
| MAOA      | -1.9 | 7.84E-04 |
| DAPK1     | -1.9 | 1.20E-02 |
| FOXF2     | -1.9 | 5.72E-03 |
| KLHL7     | -1.9 | 2.88E-03 |
| SEMA4D    | -1.8 | 3.81E-02 |
| RNF213    | -1.8 | 3.66E-02 |
| HAPLN4    | -1.8 | 5.64E-03 |
| ACSF2     | -1.8 | 1.98E-04 |
| SATB1     | -1.8 | 2.46E-02 |
| PKNOX2    | -1.8 | 5.16E-02 |
| NR1D1     | -1.8 | 3.13E-02 |
| SLC16A5   | -1.8 | 9.64E-03 |
| CADM1     | -1.8 | 2.11E-02 |
| TEF       | -1.8 | 3.94E-03 |
| MEIS2     | -1.8 | 5.29E-02 |
| AKR1E2    | -1.8 | 4.12E-03 |
| ADGRL1    | -1.8 | 4.66E-02 |
| HIC1      | -1.8 | 1.41E-02 |
| MAP2K6    | -1.8 | 4.90E-02 |
| TMPRSS2   | -1.8 | 1.60E-02 |
| LGALS9    | -1.8 | 1.10E-02 |

|          |      |          |
|----------|------|----------|
| CLCN2    | -1.8 | 3.54E-05 |
| POUGF1   | -1.8 | 3.37E-02 |
| CD86     | -1.8 | 1.93E-02 |
| LTBP4    | -1.8 | 5.61E-03 |
| WNT2B    | -1.8 | 1.98E-02 |
| ADA      | -1.7 | 2.04E-02 |
| LIFR     | -1.7 | 7.18E-03 |
| ARHGAP6  | -1.7 | 3.47E-02 |
| IFITM1L2 | -1.7 | 8.91E-03 |
| FGFRL1   | -1.7 | 1.45E-02 |
| CIITA    | -1.7 | 4.54E-02 |
| SLA-DMB  | -1.7 | 2.70E-02 |
| IHH      | -1.7 | 7.62E-03 |
| ZBTB4    | -1.7 | 1.22E-03 |
| TAP1     | -1.7 | 2.23E-02 |
| SLC9A2   | -1.7 | 1.92E-03 |
| PTCH1    | -1.7 | 4.04E-02 |
| C1QA     | -1.7 | 1.29E-02 |
| CDKN2B   | -1.7 | 7.89E-03 |
| SLA-2    | -1.7 | 5.02E-02 |
| BDH1     | -1.7 | 7.89E-03 |
| FCGR3A   | -1.7 | 1.21E-02 |
| APOL2    | -1.7 | 3.42E-02 |
| C1QC     | -1.7 | 1.61E-02 |
| ABCA1    | -1.7 | 5.31E-02 |
| CDH24    | -1.7 | 3.29E-02 |
| IL2RB    | -1.7 | 2.69E-02 |
| JAML     | -1.7 | 3.23E-02 |
| TNFAIP2  | -1.7 | 1.04E-03 |
| ABCB6    | -1.6 | 5.08E-03 |
| CTSD     | -1.6 | 1.68E-02 |
| DOK2     | -1.6 | 3.97E-02 |
| SLC45A3  | -1.6 | 2.17E-02 |
| IGSF3    | -1.6 | 5.40E-02 |
| TMPRSS4  | -1.6 | 6.34E-03 |
| CD33     | -1.6 | 4.32E-02 |
| FGF11    | -1.6 | 2.39E-02 |
| SLA-3    | -1.6 | 4.54E-02 |
| TCF21    | -1.6 | 1.33E-02 |
| SNX4     | -1.6 | 5.72E-03 |
| PNPLA6   | -1.6 | 6.03E-03 |
| CD302    | -1.6 | 5.19E-02 |
| PFKFB4   | -1.6 | 5.72E-03 |
| RETSAT   | -1.6 | 7.89E-03 |
| LCP2     | -1.6 | 1.11E-02 |
| GIMAP8   | -1.6 | 1.73E-02 |
| NADK     | -1.6 | 4.96E-03 |
| F8       | -1.6 | 3.01E-02 |
| SCARB2   | -1.6 | 5.21E-04 |
| SLC25A27 | -1.6 | 7.18E-03 |
| ELMSAN1  | -1.6 | 3.05E-02 |
| SLA-11   | -1.6 | 4.46E-02 |
| ZNF664   | -1.6 | 5.37E-03 |
| SLC8A1   | -1.6 | 5.29E-02 |
| TP53INP2 | -1.6 | 3.64E-02 |
| RALGDS   | -1.6 | 2.21E-02 |
| COL4A6   | -1.6 | 4.50E-02 |
| SIPA1    | -1.6 | 5.29E-02 |
| CSF2RB   | -1.5 | 4.36E-02 |
| CD300H   | -1.5 | 3.24E-02 |
| GSTP1    | -1.5 | 4.90E-02 |
| PIK3IP1  | -1.5 | 4.80E-02 |
| TMEM140  | -1.5 | 3.04E-02 |
| CSF1     | -1.5 | 1.68E-02 |
| PLCD1    | -1.5 | 3.39E-02 |
| VDR      | -1.5 | 3.04E-02 |
| IL10RA   | -1.5 | 3.17E-02 |
| IRF9     | -1.5 | 4.68E-02 |
| ASAP3    | -1.5 | 4.15E-02 |
| MERTK    | -1.5 | 4.10E-02 |
| SYNE1    | -1.5 | 4.69E-02 |
| DTX3     | -1.5 | 2.14E-02 |
| BSG      | -1.5 | 2.27E-02 |
| ADCY9    | -1.5 | 5.72E-03 |
| MOV10    | -1.5 | 1.20E-02 |
| HPSE     | -1.5 | 5.25E-02 |
| UGT1A10  | -1.5 | 8.65E-03 |
| PNPLA2   | -1.5 | 3.42E-02 |
| TST      | -1.5 | 5.16E-02 |
| COBL     | -1.5 | 1.01E-02 |

|           |      |          |
|-----------|------|----------|
| TSPAN7    | -1.5 | 3.19E-02 |
| UNC93B1   | -1.5 | 4.34E-02 |
| LRP4      | -1.5 | 5.02E-02 |
| MAP3K3    | -1.5 | 1.38E-02 |
| CSF1R     | -1.5 | 4.54E-02 |
| GABARAPL1 | -1.5 | 2.90E-02 |
| PCGF2     | -1.5 | 5.29E-02 |
| SLC30A7   | 1.5  | 3.01E-02 |
| TMED2     | 1.5  | 1.87E-02 |
| HMGB1     | 1.5  | 1.59E-02 |
| ENTPD6    | 1.5  | 4.58E-02 |
| EPRS      | 1.5  | 1.81E-02 |
| SMAD1     | 1.5  | 1.17E-02 |
| MAP4K4    | 1.5  | 9.03E-03 |
| SELENOS   | 1.5  | 3.07E-02 |
| SLC39A11  | 1.5  | 3.01E-02 |
| EDEM1     | 1.5  | 2.46E-02 |
| MAPK6     | 1.5  | 4.90E-02 |
| MET       | 1.5  | 4.52E-02 |
| SLC30A5   | 1.5  | 3.16E-02 |
| NECTIN1   | 1.5  | 3.13E-02 |
| MAL2      | 1.5  | 8.79E-03 |
| CDH17     | 1.5  | 3.46E-02 |
| COPB1     | 1.5  | 4.68E-02 |
| SHMT2     | 1.5  | 1.06E-02 |
| VLDLR     | 1.5  | 7.00E-03 |
| ACTG1     | 1.5  | 2.84E-03 |
| ARF2      | 1.5  | 4.54E-02 |
| SLC39A7   | 1.5  | 1.20E-02 |
| ERLEC1    | 1.5  | 4.94E-02 |
| SLC7A1    | 1.5  | 3.05E-02 |
| SPRED1    | 1.5  | 7.34E-03 |
| SELENOF   | 1.5  | 1.19E-02 |
| S100A11   | 1.5  | 3.35E-02 |
| UFM1      | 1.5  | 2.36E-02 |
| ANXA5     | 1.5  | 1.54E-02 |
| TACC3     | 1.5  | 3.05E-02 |
| PGK1      | 1.5  | 1.73E-02 |
| HMGB2     | 1.5  | 1.72E-02 |
| CTNNB1    | 1.5  | 8.88E-03 |
| MYBL2     | 1.5  | 3.16E-02 |
| MCM6      | 1.5  | 2.31E-02 |
| STT3A     | 1.5  | 2.64E-02 |
| C9        | 1.5  | 5.09E-02 |
| CBFA2T2   | 1.5  | 2.97E-02 |
| ANXA2     | 1.5  | 9.17E-03 |
| SERP1     | 1.5  | 8.65E-03 |
| PRTFDC1   | 1.5  | 4.54E-02 |
| RACGAP1   | 1.5  | 2.85E-02 |
| AMIGO3    | 1.6  | 5.61E-03 |
| OSMR      | 1.6  | 1.24E-02 |
| RPN2      | 1.6  | 1.62E-02 |
| ODC1      | 1.6  | 4.12E-03 |
| FZD6      | 1.6  | 4.12E-02 |
| HMG2      | 1.6  | 1.45E-03 |
| SPATS2    | 1.6  | 3.11E-03 |
| UBE2S     | 1.6  | 1.44E-02 |
| PLK1      | 1.6  | 1.79E-02 |
| SKA2      | 1.6  | 5.02E-02 |
| TSPAN13   | 1.6  | 1.37E-02 |
| CHEK2     | 1.6  | 1.60E-02 |
| BNIP3     | 1.6  | 7.73E-03 |
| KCNE3     | 1.6  | 6.59E-03 |
| FICD      | 1.6  | 2.91E-02 |
| SLC35C1   | 1.6  | 7.89E-03 |
| SEC24D    | 1.6  | 1.45E-03 |
| SELENOM   | 1.6  | 1.73E-02 |
| TMEM38B   | 1.6  | 5.49E-02 |
| MIA3      | 1.6  | 4.10E-03 |
| SLC1A5    | 1.6  | 5.72E-03 |
| SERPINB1  | 1.6  | 1.75E-02 |
| P2RX4     | 1.6  | 4.88E-03 |
| BIRC5     | 1.6  | 1.82E-02 |
| GARS      | 1.6  | 1.95E-03 |
| ADGRG6    | 1.6  | 2.36E-02 |
| CASC4     | 1.6  | 2.07E-03 |
| TK1       | 1.6  | 3.23E-02 |
| CLIC2     | 1.6  | 1.22E-02 |
| LRRC59    | 1.6  | 1.88E-02 |
| RRBP1     | 1.6  | 1.17E-02 |

|            |     |          |
|------------|-----|----------|
| STARD10    | 1.6 | 4.04E-03 |
| SLC17A9    | 1.6 | 5.72E-03 |
| P4HA2      | 1.6 | 3.60E-03 |
| KIF22      | 1.6 | 9.28E-03 |
| CYP51A1    | 1.6 | 5.76E-03 |
| C3         | 1.6 | 3.66E-02 |
| CAD        | 1.6 | 1.54E-03 |
| SEL1L3     | 1.6 | 7.42E-03 |
| PCDH12     | 1.6 | 5.06E-02 |
| ARG2       | 1.6 | 2.16E-02 |
| S100A6     | 1.6 | 1.55E-02 |
| CMAS       | 1.6 | 6.03E-03 |
| CFI        | 1.6 | 4.23E-02 |
| DHCR7      | 1.6 | 1.99E-03 |
| POLE       | 1.6 | 1.60E-02 |
| FOXA1      | 1.6 | 3.80E-02 |
| MANF       | 1.6 | 3.08E-02 |
| NSDHL      | 1.6 | 4.96E-03 |
| WLS        | 1.6 | 1.61E-02 |
| CDH1       | 1.6 | 8.68E-03 |
| B4GALT1    | 1.6 | 4.04E-02 |
| C9H1orf116 | 1.6 | 7.00E-03 |
| GFPT1      | 1.7 | 3.70E-03 |
| SEC11C     | 1.7 | 8.53E-03 |
| PIIB       | 1.7 | 3.55E-03 |
| IL33       | 1.7 | 1.40E-02 |
| HSP90B1    | 1.7 | 2.68E-02 |
| DNAJC10    | 1.7 | 3.09E-03 |
| PLK2       | 1.7 | 9.11E-03 |
| SEC61G     | 1.7 | 7.96E-03 |
| PANK1      | 1.7 | 2.78E-02 |
| ACSL3      | 1.7 | 2.03E-03 |
| ARF4       | 1.7 | 1.90E-03 |
| XBP1       | 1.7 | 3.59E-03 |
| STARD5     | 1.7 | 4.28E-03 |
| TSPAN12    | 1.7 | 4.45E-04 |
| RIPK3      | 1.7 | 5.64E-03 |
| FASN       | 1.7 | 3.60E-03 |
| DNA2       | 1.7 | 3.13E-02 |
| GALNT7     | 1.7 | 2.49E-03 |
| CDC25C     | 1.7 | 1.33E-02 |
| GNA14      | 1.7 | 5.35E-03 |
| PKM        | 1.7 | 1.40E-03 |
| WFS1       | 1.7 | 1.61E-03 |
| LIPH       | 1.7 | 8.88E-03 |
| BLM        | 1.7 | 3.03E-02 |
| TPX2       | 1.7 | 6.03E-03 |
| ALDOC      | 1.7 | 1.06E-02 |
| HIF1A      | 1.7 | 3.73E-03 |
| BST1       | 1.7 | 5.72E-03 |
| MMD        | 1.7 | 4.10E-03 |
| SC5D       | 1.7 | 1.42E-03 |
| ATOH1      | 1.7 | 2.37E-02 |
| DERL3      | 1.7 | 7.70E-03 |
| PHLDA1     | 1.7 | 1.31E-02 |
| YARS2      | 1.7 | 2.77E-02 |
| DDIT4      | 1.7 | 9.24E-04 |
| SLC5A1     | 1.7 | 6.38E-03 |
| SLC35A3    | 1.7 | 1.61E-02 |
| PDIA4      | 1.7 | 7.74E-03 |
| FLVCR2     | 1.8 | 2.73E-03 |
| MANSC1     | 1.8 | 2.51E-04 |
| BUB1       | 1.8 | 2.17E-02 |
| FDPS       | 1.8 | 2.52E-03 |
| PGM3       | 1.8 | 9.17E-04 |
| HELLS      | 1.8 | 7.06E-03 |
| MVD        | 1.8 | 5.01E-04 |
| CCNB2      | 1.8 | 2.21E-02 |
| BGN        | 1.8 | 4.69E-02 |
| ATOX1      | 1.8 | 8.67E-03 |
| PNP        | 1.8 | 7.47E-03 |
| NT5DC2     | 1.8 | 5.72E-03 |
| LSS        | 1.8 | 3.41E-04 |
| AACS       | 1.8 | 1.18E-04 |
| ARNTL2     | 1.8 | 5.25E-02 |
| FADS1      | 1.8 | 8.80E-05 |
| RRM2       | 1.8 | 2.15E-04 |
| BUB1B      | 1.8 | 9.28E-03 |
| ECM1       | 1.8 | 3.23E-03 |
| TOP2A      | 1.8 | 4.25E-03 |

|          |     |          |
|----------|-----|----------|
| DGAT2    | 1.8 | 3.05E-02 |
| E2F7     | 1.8 | 1.34E-02 |
| ETV5     | 1.8 | 1.26E-02 |
| SLC50A1  | 1.8 | 9.18E-04 |
| ECSCR    | 1.8 | 3.94E-03 |
| MIS18A   | 1.9 | 1.76E-02 |
| ADAM9    | 1.9 | 2.26E-04 |
| AFF2     | 1.9 | 4.49E-02 |
| TRAIP    | 1.9 | 5.08E-03 |
| PHLDA2   | 1.9 | 2.92E-02 |
| ZGRF1    | 1.9 | 2.01E-02 |
| SMOC2    | 1.9 | 2.90E-02 |
| CDC48    | 1.9 | 9.35E-04 |
| SLC24A5  | 1.9 | 4.98E-02 |
| HMGCR    | 1.9 | 1.78E-04 |
| GADD45A  | 1.9 | 5.02E-03 |
| CFB      | 1.9 | 2.38E-02 |
| GIN51    | 1.9 | 7.55E-03 |
| KIF23    | 1.9 | 5.99E-03 |
| ACLY     | 1.9 | 1.76E-05 |
| BCAT1    | 1.9 | 5.18E-03 |
| CCR2     | 1.9 | 3.11E-02 |
| MYOF     | 1.9 | 1.39E-04 |
| CD163    | 1.9 | 2.29E-02 |
| THBD     | 1.9 | 3.32E-03 |
| COL7A1   | 1.9 | 1.47E-03 |
| BMP7     | 1.9 | 1.22E-03 |
| SMC2     | 1.9 | 4.42E-03 |
| FDFT1    | 1.9 | 1.14E-05 |
| MASTL    | 1.9 | 4.54E-02 |
| SULT1A1  | 1.9 | 1.57E-02 |
| PRDX4    | 1.9 | 1.03E-03 |
| "MARCH3" | 1.9 | 8.78E-03 |
| SLC7A5   | 1.9 | 1.40E-03 |
| CHEK1    | 1.9 | 2.00E-02 |
| CD24     | 1.9 | 6.90E-03 |
| STARD4   | 1.9 | 8.33E-04 |
| HSD17B7  | 1.9 | 1.22E-03 |
| LMAN1    | 2.0 | 1.88E-04 |
| SERPINE2 | 2.0 | 1.59E-02 |
| PKD1L2   | 2.0 | 4.19E-02 |
| SLC25A35 | 2.0 | 9.64E-03 |
| DEPDC1   | 2.0 | 3.05E-02 |
| ADM5     | 2.0 | 7.68E-03 |
| GPR19    | 2.0 | 1.76E-02 |
| GNE      | 2.0 | 5.66E-05 |
| COL8A1   | 2.0 | 1.40E-02 |
| CD14     | 2.0 | 7.89E-03 |
| CDK1     | 2.0 | 7.19E-03 |
| IGLL5L   | 2.0 | 5.49E-02 |
| SERPINB5 | 2.0 | 9.60E-04 |
| AZGP1    | 2.0 | 3.20E-02 |
| KIAA0101 | 2.0 | 7.84E-04 |
| KRT18    | 2.0 | 1.04E-03 |
| PCK2     | 2.0 | 3.22E-04 |
| ADAM20L2 | 2.0 | 2.60E-03 |
| TMED3    | 2.0 | 1.16E-03 |
| SHCBP1   | 2.0 | 5.72E-03 |
| HMMR     | 2.0 | 1.22E-03 |
| LDLR     | 2.1 | 2.26E-04 |
| DHRS9    | 2.1 | 1.73E-02 |
| SEMA7A   | 2.1 | 1.51E-03 |
| MEST     | 2.1 | 2.12E-02 |
| CXCR4    | 2.1 | 5.27E-04 |
| SPDL1    | 2.1 | 2.79E-02 |
| F13A1    | 2.1 | 1.19E-03 |
| ZNF215   | 2.1 | 2.39E-02 |
| KNL1     | 2.1 | 2.84E-03 |
| SLC1A2   | 2.1 | 2.44E-02 |
| ASGR2    | 2.1 | 3.46E-02 |
| GCNT3    | 2.1 | 7.34E-03 |
| ITGA2    | 2.2 | 1.50E-04 |
| SERPINB8 | 2.2 | 2.45E-04 |
| IGHE     | 2.2 | 1.73E-02 |
| CFHR2    | 2.2 | 4.39E-02 |
| MYBL1    | 2.2 | 4.61E-02 |
| STC1     | 2.2 | 3.42E-03 |
| HIST1H3A | 2.2 | 9.33E-03 |
| EGF      | 2.2 | 1.60E-03 |
| PFKFB3   | 2.2 | 5.86E-04 |

|              |     |          |
|--------------|-----|----------|
| MSMO1        | 2.2 | 4.56E-06 |
| GALNT6       | 2.2 | 3.33E-06 |
| IDI1         | 2.2 | 2.17E-04 |
| FABP3        | 2.3 | 1.30E-03 |
| VSTM1        | 2.3 | 7.89E-03 |
| FADS2        | 2.3 | 1.63E-05 |
| CFAP74       | 2.3 | 3.65E-03 |
| MED12L       | 2.3 | 6.53E-03 |
| SQLE         | 2.3 | 8.68E-06 |
| SPHKAP       | 2.3 | 1.77E-02 |
| HP           | 2.3 | 1.38E-02 |
| FFAR4        | 2.3 | 5.35E-03 |
| C4BPB        | 2.3 | 1.66E-04 |
| LOC102161685 | 2.3 | 4.59E-04 |
| EBP          | 2.3 | 4.62E-06 |
| LIPG         | 2.3 | 4.46E-02 |
| TMEM158      | 2.4 | 4.39E-02 |
| OSM          | 2.4 | 1.97E-02 |
| PTGER1       | 2.4 | 2.11E-03 |
| LAMB3        | 2.4 | 1.73E-07 |
| ELOVL6       | 2.4 | 1.46E-05 |
| IFIT1L1      | 2.4 | 2.12E-02 |
| SCNN1D       | 2.4 | 4.59E-03 |
| FGF7         | 2.4 | 6.47E-04 |
| IGFBP4       | 2.4 | 1.00E-05 |
| CXCL14       | 2.4 | 2.69E-05 |
| TFF3         | 2.4 | 2.78E-03 |
| POU2AF1      | 2.4 | 1.75E-04 |
| CACNA1F      | 2.4 | 4.37E-02 |
| TNFRSF12A    | 2.5 | 1.07E-04 |
| TFRC         | 2.5 | 2.06E-05 |
| PPP2R5E      | 2.5 | 1.68E-02 |
| HSD11B1      | 2.5 | 5.23E-04 |
| ROS1         | 2.5 | 2.01E-02 |
| SPHK1        | 2.5 | 2.43E-03 |
| ACAT2        | 2.5 | 4.51E-08 |
| FCN2         | 2.5 | 2.74E-03 |
| SCD          | 2.5 | 1.62E-04 |
| GPAT3        | 2.5 | 7.03E-05 |
| BAALC        | 2.6 | 9.35E-04 |
| PTPRN2       | 2.6 | 3.00E-03 |
| MMP9         | 2.6 | 6.92E-03 |
| IGH@         | 2.6 | 1.24E-02 |
| ME1          | 2.6 | 5.20E-03 |
| HHIPL1       | 2.6 | 1.78E-04 |
| ETV4         | 2.7 | 1.36E-04 |
| SNCA         | 2.7 | 4.96E-03 |
| PLA2G3       | 2.7 | 4.13E-04 |
| HMGCS1       | 2.8 | 3.97E-07 |
| ADGRE1       | 2.8 | 3.05E-02 |
| PLAUR        | 2.8 | 4.01E-04 |
| WAP1*        | 2.8 | 3.59E-02 |
| CLCA1        | 2.8 | 6.25E-04 |
| TMEM190      | 2.8 | 4.80E-02 |
| NKX2-2       | 2.8 | 5.20E-03 |
| CLEC10A      | 2.9 | 3.05E-02 |
| LCN2         | 2.9 | 6.98E-03 |
| B3GNT6       | 2.9 | 5.44E-04 |
| SLC11A1      | 2.9 | 2.78E-02 |
| TIMP1        | 2.9 | 2.65E-07 |
| INSIG1       | 2.9 | 1.64E-08 |
| ALDH3B2      | 2.9 | 1.18E-02 |
| TGM3         | 3.0 | 3.20E-02 |
| TREM2        | 3.0 | 7.72E-03 |
| MMP1         | 3.1 | 2.86E-02 |
| SLC12A8      | 3.1 | 3.65E-04 |
| ABAT         | 3.1 | 1.97E-03 |
| ADAM12       | 3.1 | 1.29E-03 |
| PDZK1IP1L    | 3.1 | 8.64E-04 |
| ITGB6        | 3.1 | 2.10E-07 |
| CCL23        | 3.1 | 2.69E-03 |
| TLE6         | 3.2 | 5.27E-04 |
| PHGDH        | 3.3 | 5.01E-04 |
| PTGS2        | 3.4 | 8.84E-04 |
| GABRD        | 3.4 | 4.54E-04 |
| CBS          | 3.5 | 7.42E-05 |
| SPDEF        | 3.5 | 2.29E-06 |
| RN7SL1       | 3.5 | 3.19E-02 |
| TNIP3        | 3.5 | 3.16E-03 |
| LRP2         | 3.6 | 1.26E-02 |

|            |      |          |
|------------|------|----------|
| SHANK2     | 3.6  | 4.23E-04 |
| SYNE4      | 3.6  | 4.65E-03 |
| SLC7A11    | 3.7  | 3.60E-02 |
| P4HA3      | 3.7  | 1.39E-04 |
| STRA6      | 3.8  | 6.03E-03 |
| MUC2       | 3.8  | 1.60E-07 |
| IL1R2      | 3.8  | 1.61E-03 |
| NEUROG3    | 3.8  | 3.07E-03 |
| TNFRSF11B  | 3.9  | 5.64E-05 |
| SERPINB2   | 3.9  | 1.24E-02 |
| NPC1L1     | 3.9  | 4.56E-02 |
| PSAT1      | 3.9  | 3.89E-03 |
| NTRK1      | 4.0  | 2.12E-02 |
| COL28A1    | 4.0  | 1.89E-04 |
| CAPNS2     | 4.1  | 7.03E-05 |
| S100A2     | 4.2  | 1.75E-04 |
| HK2        | 4.2  | 1.78E-04 |
| MYOM3      | 4.2  | 1.12E-05 |
| SAA3       | 4.5  | 3.27E-02 |
| PADI4      | 4.5  | 4.99E-02 |
| RNF39      | 4.5  | 6.41E-07 |
| SERPINA1   | 4.5  | 9.03E-04 |
| S100A3     | 4.5  | 2.35E-02 |
| AADAC      | 4.6  | 3.59E-03 |
| HOXD1      | 4.6  | 9.07E-03 |
| ADM2       | 4.7  | 7.03E-05 |
| WNT2       | 4.7  | 1.78E-04 |
| MPTX       | 4.9  | 2.10E-07 |
| UPK1B      | 5.0  | 2.36E-06 |
| BPIFB2     | 5.0  | 1.64E-03 |
| FAM71E2    | 5.0  | 3.52E-02 |
| F3         | 5.2  | 1.85E-10 |
| SNORA48    | 5.2  | 2.03E-03 |
| CHI3L1     | 5.2  | 2.51E-04 |
| PI3        | 5.3  | 1.15E-03 |
| NPPC       | 5.7  | 3.92E-04 |
| AGR2       | 5.7  | 6.15E-07 |
| COL26A1    | 5.8  | 6.82E-05 |
| SPINK4     | 5.8  | 1.64E-08 |
| BPIFB6     | 6.0  | 4.61E-02 |
| GYS2       | 6.0  | 4.66E-02 |
| MCHR1      | 6.1  | 3.59E-02 |
| SERPINB11  | 6.3  | 3.20E-03 |
| IL36A      | 6.8  | 6.44E-03 |
| SULT2A1    | 7.5  | 5.36E-02 |
| ANXA8      | 7.6  | 1.18E-05 |
| TRIM6      | 7.8  | 9.11E-03 |
| ADAM20L6   | 8.1  | 1.07E-03 |
| CRLF1      | 8.2  | 1.09E-08 |
| ADAMTS16   | 8.3  | 2.23E-05 |
| IL11       | 8.3  | 1.22E-03 |
| PCSK9      | 9.0  | 1.11E-11 |
| A3GALT2    | 9.7  | 1.38E-02 |
| REG4       | 9.9  | 1.95E-09 |
| AQP5       | 10.2 | 1.63E-03 |
| IGHG1      | 10.3 | 8.11E-04 |
| MMP7       | 10.5 | 7.62E-03 |
| S100A8     | 10.8 | 2.17E-03 |
| S100A9     | 11.0 | 2.03E-03 |
| MMP8       | 11.4 | 3.47E-03 |
| MMP13      | 11.4 | 2.65E-07 |
| TFF2       | 12.2 | 3.25E-02 |
| SLC6A2     | 13.1 | 2.14E-02 |
| S100A12    | 13.4 | 7.36E-04 |
| PRG4       | 13.5 | 3.43E-04 |
| MMP12      | 13.9 | 7.63E-10 |
| C1QL2      | 15.4 | 1.39E-04 |
| SERPINA3-2 | 16.2 | 1.05E-06 |
| ARG1       | 16.6 | 8.41E-04 |
| SCGB2A2    | 17.9 | 4.89E-06 |
| POUSF1     | 19.0 | 3.78E-02 |
| PADI3      | 19.0 | 4.69E-03 |
| RHCG       | 19.8 | 5.18E-04 |
| SPINK6     | 21.5 | 4.16E-04 |
| WNT7A      | 25.9 | 4.23E-02 |
| IL4I1L     | 26.0 | 1.39E-04 |
| CLEC18A    | 46.3 | 9.53E-05 |
| PADI1      | 51.6 | 6.25E-04 |
| TFF1       | 93.2 | 3.12E-06 |
