# Supplementary material for: Molecular and metabolomic changes in the proximal colon of pigs infected with Trichuris suis
Source: PubMed Central journal article supplement (PMC7393168; doi:10.1038/s41598-020-69462-5), 2020-07-30
Supplement: 41598_2020_69462_MOESM7_ESM.pdf [file 41598_2020_69462_MOESM7_ESM.pdf]

**Molecular and metabolomic changes in the proximal colon of pigs infected with *Trichuris suis***

Harry Dawson<sup>1</sup>, Celine Chen<sup>1</sup>, Robert Li<sup>2</sup>, Lauren Nicki Bell<sup>3</sup>, Terez Shea-Donohue<sup>4</sup>, Helene Kringel<sup>5</sup>, Ethiopia Beshah<sup>1</sup>, Dolores E. Hill<sup>2</sup>, Joseph F. Urban Jr<sup>1,2</sup>.

<sup>1</sup>United States Department of Agriculture, Agricultural Research Service, Northeast Area, Beltsville Human Nutrition Research Center, Diet Genomics and Immunology Laboratory, <sup>2</sup> Beltsville Agricultural Research Center, Animal Parasitology Disease Laboratory, Beltsville, MD; <sup>3</sup>Metabolon, Inc., Morrisville, NC; <sup>4</sup>University of Maryland School of Medicine, Baltimore, MD, USA; <sup>5</sup>Department of Veterinary Disease Biology, Faculty of Health and Medical Sciences, University of Copenhagen, Copenhagen, Denmark

Supplemental Table S7

Supplemental Table S7: Clustered Up-regulation of Physiology and Immunology DEGs

| Gene                                                       | Functional Categorization                                                            | 52 DPI w worms vs Control Fold | EDGE FDR Adj p value | 52 DPI w/o worms vs Control Fold | EDGE FDR Adj p value | (52 DPI Inf w/o worms vs w Worms Fold) | EDGE FDR Adj p value | (21 DPI Inf vs Control) Fold | EDGE FDR Adj p value |
|------------------------------------------------------------|--------------------------------------------------------------------------------------|--------------------------------|----------------------|----------------------------------|----------------------|----------------------------------------|----------------------|------------------------------|----------------------|
| <b>Antibacterial Response</b>                              |                                                                                      |                                |                      |                                  |                      |                                        |                      |                              |                      |
| BPIFB2                                                     | Bacterial Binding (12185532); BPI SF                                                 | 6.7                            | 2.43E-03             |                                  |                      | 5.0                                    | 1.64E-03             |                              |                      |
| BPIFB6                                                     | Bacterial Binding (12185532); BPI SF                                                 | 11.0                           | 4.32E-02             |                                  |                      | 6.0                                    | 4.61E-02             |                              |                      |
| GNLY                                                       | Antimicrobial Peptide (15996224); SapB 2 SF                                          | 68.8                           | 2.42E-09             | 132.0                            | 2.98E-11             |                                        |                      |                              |                      |
| HMG2                                                       | Antimicrobial Peptide (16204630); HMG14/17 SF                                        |                                |                      |                                  |                      |                                        |                      | 1.6                          | 1.45E-03             |
| LCN2                                                       | Antibacterial Response (15531878, 25398327); Lipocalin SF                            | 3.0                            | 1.80E-02             |                                  |                      | 2.9                                    | 6.98E-03             |                              |                      |
| LTF                                                        | Antibacterial Response (8423097); Transferrin SF                                     | 52.9                           | 5.95E-03             |                                  |                      |                                        |                      |                              |                      |
| LYZ                                                        | Antibacterial Response (28804131); LYZ1 SF                                           | 13.0                           | 7.77E-03             |                                  |                      |                                        |                      |                              |                      |
| NTRK1                                                      | Antibacterial Response (25359983); Allergic Inflammation (25389033); Ig SF; LRRCT SF | 42.0                           | 2.62E-07             | 10.6                             | 3.53E-03             | 4.0                                    | 2.12E-02             |                              |                      |
| OLFM4                                                      | (-) Regulator of Antibacterial Responses (20534456, 22844115); OLF SF                | 2.2                            | 1.48E-02             |                                  |                      |                                        |                      |                              |                      |
| PADI4                                                      | Antibacterial Responses (20733033); PAD SF                                           | 11.0                           | 7.93E-03             |                                  |                      | 4.5                                    | 4.99E-02             |                              |                      |
| PI3                                                        | Antimicrobial Peptide Activity (17964057); WAP SF                                    | 4.7                            | 1.63E-02             |                                  |                      | 5.3                                    | 1.15E-03             | 4.6                          | 2.55E-08             |
| S100A14                                                    | Antibacterial Response (15568027); S100 SF (17625598)                                |                                |                      |                                  |                      |                                        |                      | 1.8                          | 2.70E-02             |
| SLPI                                                       | Antimicrobial Peptide Activity (18075823); WAP SF                                    |                                |                      |                                  |                      |                                        |                      | 4.8                          | 2.22E-11             |
| SPHK1                                                      | Antibacterial Response (20634980, 26113114); DAGK Cat SF                             |                                |                      |                                  |                      | 2.5                                    | 2.43E-03             | 2.8                          | 3.05E-03             |
| UPK1B                                                      | E. coli Attachment factor (9822381); Tetraspanin LEL SF                              | 10.9                           | 1.66E-08             |                                  |                      | 5.0                                    | 2.36E-06             |                              |                      |
| <b>Antiparasitic Response</b>                              |                                                                                      |                                |                      |                                  |                      |                                        |                      |                              |                      |
| AREG                                                       | Antiparasitic Response (17170297); Th2-Associated (17170297); PHA02887 SF            | 2.1                            | 2.09E-02             |                                  |                      |                                        |                      | 2.2                          | 8.37E-03             |
| ARG1                                                       | Antiparasitic Response (19764983); M2-associated (5879104); Arginase HDAC SF         | 122.6                          | 4.56E-05             |                                  |                      | 16.6                                   | 8.41E-04             | 30.1                         | 2.28E-07             |
| CHIA                                                       | Antiparasitic Response (15618176); Th2-Associated (11553626); GH18 Chitinase Like SF | 2.3                            | 3.56E-02             |                                  |                      |                                        |                      |                              |                      |
| GATA3                                                      | (+) Regulator of Th2-Cell/ILC2 Differentiation (19375293, 23733962); ZnF GATA TF SF  |                                |                      | 4.4                              | 4.43E-04             |                                        |                      |                              |                      |
| IGHE                                                       | Antiparasitic Response (24592267); Ig SF; Ig Heavy Chain Constant Region SF          | 5.0                            | 2.59E-06             | 2.3                              | 4.86E-02             | 2.2                                    | 1.73E-02             |                              |                      |
| IRF4                                                       | Antiparasitic Response (20729857); M2-associated (20729857); IRF TF SF               | 2.1                            | 2.55E-03             |                                  |                      |                                        |                      |                              |                      |
| REG3A                                                      | Antiparasitic Response (25240019); PRR (16931762)                                    | 275.6                          | 2.48E-03             | 168.9                            | 2.26E-02             |                                        |                      |                              |                      |
| REG4                                                       | Antiparasitic Response (25240019); PRR (20692269); CLECT SF                          | 15.8                           | 2.97E-08             |                                  |                      | 9.9                                    | 1.95E-09             | 11.1                         | 8.84E-20             |
| RETNLB                                                     | Antiparasitic Responses (15340149); Th2-Associated (12574343); Resistin SF           | 10.1                           | 2.14E-03             |                                  |                      |                                        |                      |                              |                      |
| SERPINB2                                                   | Antiparasitic Response (23630350) M2-associated (23355731); SERPIN SF                | 9.8                            | 2.12E-04             |                                  |                      | 3.9                                    | 1.24E-02             | 16.2                         | 4.90E-32             |
| TFF1                                                       | Antiparasitic Response (21569362); Trefoil SF                                        | 705.1                          | 2.48E-05             |                                  |                      | 93.2                                   | 3.12E-06             | 25.9                         | 2.62E-06             |
| TFF2                                                       | Antiparasitic Response (22329990); Trefoil SF                                        | 25.1                           | 3.57E-02             |                                  |                      | 12.2                                   | 3.25E-02             | 37.1                         | 6.93E-10             |
| TFF3                                                       | Epithelial Wound Healing (16410243); IL-4 Induced (15004182); Trefoil SF             | 2.7                            | 2.49E-03             |                                  |                      | 2.4                                    | 2.78E-03             |                              |                      |
| <b>Complement Related</b>                                  |                                                                                      |                                |                      |                                  |                      |                                        |                      |                              |                      |
| FCN1                                                       | Complement Activation (20375620); PRR (21490156); FReD SF                            |                                |                      |                                  |                      | 2.5                                    | 2.74E-03             | 2.9                          | 9.94E-05             |
| FCN2                                                       | Complement Activation (19632990); PRR (15331601); FReD SF                            |                                |                      |                                  |                      |                                        |                      |                              |                      |
| C1QL2                                                      | Complement Fixation; BA13 Ligand (21262840); C1q SF                                  | 7.0                            | 4.51E-02             |                                  |                      | 15.4                                   | 1.39E-04             |                              |                      |
| C3                                                         | Complement Component; A2M SF; ANATO SF; IsoPREN C2-like SF; MG1 SF; NTR-like SF      | 1.7                            | 3.10E-02             |                                  |                      | 1.6                                    | 3.66E-02             |                              |                      |
| C4BPA                                                      | Complement Component; CCP SF                                                         | 4.3                            | 1.37E-03             |                                  |                      |                                        |                      |                              |                      |
| C4BPB                                                      | Complement Component; CCP SF                                                         | 3.1                            | 5.70E-06             |                                  |                      | 2.3                                    | 1.66E-04             |                              |                      |
| C9                                                         | Complement Component; MACPF SF                                                       | 1.6                            | 3.93E-02             |                                  |                      | 1.5                                    | 5.09E-02             |                              |                      |
| CFB                                                        | Alternative Complement Activation Pathway; CCP SF; TSP-1 SF; vWFA SF                 | 2.1                            | 1.92E-02             |                                  |                      | 1.9                                    | 2.38E-02             |                              |                      |
| CFI                                                        | Complement factor; SRCR SF                                                           | 1.7                            | 4.15E-02             |                                  |                      |                                        |                      |                              |                      |
| CFHR2                                                      | Factor H (FH)-related Protein Family; CCP SF                                         |                                |                      |                                  |                      | 2.2                                    | 4.39E-02             |                              |                      |
| <b>Cytokines, Chemokines, Growth Factors and Receptors</b> |                                                                                      |                                |                      |                                  |                      |                                        |                      |                              |                      |
| ACKR3                                                      | CXCL12 Receptor (16107333); CXK Chemokine R SF                                       | 1.5                            | 4.95E-02             |                                  |                      |                                        |                      |                              |                      |
| AZGP1                                                      | Adipocytokine (18663996); MHC1 SF; Immunoglobulin SF                                 |                                |                      |                                  |                      | 2.0                                    | 3.20E-02             |                              |                      |
| BDNF                                                       | Cytokine (19348610); Neurotrophic; NGF SF                                            | 2.7                            | 1.64E-02             |                                  |                      |                                        |                      |                              |                      |
| BMP7                                                       | Cytokine; Development; TGFβ SF                                                       | 2.4                            | 6.17E-05             |                                  |                      | 1.9                                    | 1.22E-03             |                              |                      |
| CCL23                                                      | CCR1 Ligand (15927850); CCL Chemokine SF                                             | 5.1                            | 1.56E-04             |                                  |                      | 3.1                                    | 2.69E-03             |                              |                      |
| CCL28                                                      | CCR3 Ligand (10975800); CCL Chemokine SF                                             | 2.3                            | 4.92E-03             |                                  |                      |                                        |                      |                              |                      |
| CCR1                                                       | CCL14 Receptor; CCL16 Receptor; CCL23 Receptor; CCL Chemokine R SF                   |                                |                      |                                  |                      | 1.9                                    | 3.11E-02             |                              |                      |
| CCR2                                                       | CCL2 Receptor; CCL7 Receptor; CCL13 Receptor; CCL Chemokine R SF                     | 2.5                            | 2.63E-03             |                                  |                      | 8.2                                    | 1.09E-08             |                              |                      |
| CRLF1                                                      | Cytokine (19933857); IL6 Receptor Ligand (19933857); Ig SF; FN3 SF                   | 7.1                            | 3.16E-05             |                                  |                      |                                        |                      |                              |                      |
| CSF3R                                                      | Cytokine Receptor; Lep Receptor Ig SF                                                | 2.7                            | 1.81E-02             |                                  |                      |                                        |                      |                              |                      |
| CXCL1                                                      | CXCR2 Ligand; CXK Chemokine SF                                                       | 2.9                            | 1.56E-02             |                                  |                      |                                        |                      |                              |                      |
| CXCL14                                                     | CXCR4 Ligand (28360196); CXK Chemokine SF                                            | 3.5                            | 9.85E-08             |                                  |                      | 2.4                                    | 2.69E-05             | 4.4                          | 2.73E-06             |
| CXCL16                                                     | CXCR6 Ligand; CXK Chemokine SF                                                       |                                |                      |                                  |                      |                                        |                      | 2.0                          | 2.89E-03             |
| CXCL17                                                     | GPR35 Ligand (25411203); CXK Chemokine SF                                            |                                |                      |                                  |                      |                                        |                      | 4.5                          | 7.44E-06             |
| CXCL6                                                      | CXCR1 Ligand; CXCR2 Ligand; CXK Chemokine SF                                         | 5.3                            | 2.39E-05             | 3.1                              | 1.01E-02             |                                        |                      |                              |                      |
| CXCL8                                                      | CXCR1 Ligand; CXCR2 Ligand; CXK Chemokine SF                                         | 3.4                            | 5.32E-04             |                                  |                      |                                        |                      |                              |                      |
| CXCR1                                                      | CXCL1 R; CXCL2 R; CXCL3 R; CXCL6 R; CXCL8 R; CXK Chemokine R SF                      | 2.7                            | 1.71E-02             |                                  |                      |                                        |                      |                              |                      |
| CXCR2                                                      | CXCL1 R; CXCL2 R; CXCL3 R; CXCL6 R; CXCL8 R; CXK Chemokine R SF                      | 2.8                            | 2.64E-02             |                                  |                      |                                        |                      |                              |                      |
| CXCR4                                                      | CXCL12 R; CXK Chemokine R SF                                                         | 1.9                            | 1.45E-02             |                                  |                      |                                        |                      |                              |                      |
| EGF                                                        | Wound Healing (2045428); LY SF; vWFA SF; EGF CA SF; PHA03099 SF                      | 2.5                            | 1.10E-03             |                                  |                      | 2.1                                    | 5.27E-04             |                              |                      |
| IL11                                                       | Cytokine (27312790); Th2-Associated (15699166); IL11 SF; IL6 SF                      | 19.4                           | 3.58E-04             |                                  |                      | 8.3                                    | 1.22E-03             | 21.6                         | 6.84E-03             |
| IL13RA2                                                    | (-) Regulator of IL-13 Signaling (12642602); Th2-Associated (17697639) IL6Ra-bind SF | 3.3                            | 5.25E-02             |                                  |                      |                                        |                      | 5.0                          | 7.15E-03             |
| IL17C                                                      | IL-17RE Ligand (21993849); IL17 SF                                                   |                                |                      |                                  |                      |                                        |                      |                              |                      |
| IL17RD                                                     | Positive Regulator of IL17 Receptor Signaling; IL17 R DN SF                          | 2.0                            | 2.03E-02             |                                  |                      |                                        |                      |                              |                      |
| IL18                                                       | Th1-Associated (10679398); IL1 SF                                                    | 2.3                            | 7.08E-03             |                                  |                      |                                        |                      |                              |                      |
| IL1A                                                       | Positive Regulator of Inflammation; IL1 SF                                           | 3.6                            | 1.30E-03             |                                  |                      |                                        |                      | 2.4                          | 1.55E-03             |
| IL1B                                                       | Positive Regulator of Inflammation; IL1 SF                                           | 5.5                            | 1.20E-03             |                                  |                      |                                        |                      |                              |                      |
| IL1R2                                                      | IL1B Decoy Receptor; M2-associated (8786316); I-set SF; Ig SF                        | 10.3                           | 2.46E-06             |                                  |                      | 3.8                                    | 1.61E-03             | 6.1                          | 1.51E-06             |
| IL1RAP                                                     | Th1-Associated (10925275); Ig SF; TIR 2 SF                                           | 2.9                            | 2.14E-03             |                                  |                      |                                        |                      |                              |                      |
| IL26                                                       | STAT1 Signaling (14764663); STAT3 Signaling (14764663); Th1-Associated (17676044)    | 4.1                            | 2.96E-03             |                                  |                      |                                        |                      |                              |                      |
| IL33                                                       | Th2-Associated (16286016); IL1 SF; IL33 SF                                           | 2.0                            | 9.72E-04             |                                  |                      | 1.7                                    | 1.40E-02             |                              |                      |
| IL36A                                                      | Positive Regulator of Inflammation (23029241); IL1 SF                                | 22.7                           | 3.90E-04             |                                  |                      | 6.8                                    | 6.44E-03             | 7.2                          | 2.58E-03             |
| IL36B                                                      | Positive Regulator of Inflammation (16646978); IL1 SF                                |                                |                      |                                  |                      |                                        |                      | 30.8                         | 1.02E-02             |
| IL6                                                        | Positive Regulator of Inflammation; Th2-Associated (12431386); IL6 SF                | 6.5                            | 1.29E-04             |                                  |                      |                                        |                      |                              |                      |
| MDK                                                        | Cytokine; PTN MK N SF                                                                |                                |                      |                                  |                      |                                        |                      | 2.8                          | 4.44E-04             |
| NRG1                                                       | Cytokine (12204892); Ig SF; EGF CA SF; Neuregulin SF                                 | 4.3                            | 8.21E-05             |                                  |                      |                                        |                      | 3.8                          | 2.41E-02             |
| OSM                                                        | Positive Regulator of Inflammation (12496442); LIF OSM SF                            | 4.4                            | 1.92E-04             |                                  |                      | 2.4                                    | 1.97E-02             |                              |                      |
| OSMR                                                       | Type I Cytokine Receptor Family; IL6Ra-bind SF                                       | 2.0                            | 1.41E-04             |                                  |                      | 1.6                                    | 1.24E-02             |                              |                      |
| PTN                                                        | Cytokine; PTN MK N SF                                                                |                                |                      |                                  |                      |                                        |                      | 1.9                          | 1.03E-02             |
| TNFRSF10B                                                  | Positive Regulator of Apoptosis (9311998); DD SF; TNFR SF                            | 1.8                            | 3.08E-03             |                                  |                      |                                        |                      |                              |                      |
| TNFRSF11A                                                  | TNFR SF                                                                              | 1.7                            | 3.61E-02             |                                  |                      |                                        |                      |                              |                      |
| TNFRSF11B                                                  | Crohn's Disease (15803021); Decoy Receptor; DD SF; TNFR SF                           | 4.6                            | 1.51E-04             |                                  |                      | 3.9                                    | 5.64E-05             |                              |                      |
| TNFRSF12A                                                  | Positive Regulator of Apoptosis (21525013); Wound Healing (11728344); TNFR SF        | 5.0                            | 6.86E-10             | 2.0                              | 2.26E-02             | 2.5                                    | 1.07E-04             |                              |                      |
| TNFRSF26                                                   | TNFR SF                                                                              |                                |                      |                                  |                      |                                        |                      | 2.5                          | 2.44E-02             |
| TNFRSF6B                                                   | Decoy Receptor; Th2-Associated (14657214); TNFR SF                                   | 2.4                            | 4.77E-03             |                                  |                      |                                        |                      |                              |                      |
| TNFRSF8                                                    | TNFRSF8 Receptor; Th2-associated (9036953); TNFR SF                                  |                                |                      |                                  |                      |                                        |                      | 4.0                          | 2.04E-02             |
| TNFSF15                                                    | Th1-Associated (14568967); TNF SF                                                    | 1.8                            | 2.54E-02             |                                  |                      |                                        |                      |                              |                      |
| TNFSF18                                                    | TNFRSF18/GITR Ligand; TNF SF                                                         |                                |                      |                                  |                      |                                        |                      | 3.8                          | 3.17E-02             |

| Extracellular Matrix and Remodeling                           |                                                                                         |       |          |      |          |  |  |      |          |      |      |          |
|---------------------------------------------------------------|-----------------------------------------------------------------------------------------|-------|----------|------|----------|--|--|------|----------|------|------|----------|
| A2ML1                                                         | Protease Inhibitor (16298998); AZM SF                                                   |       |          |      |          |  |  |      |          |      | 16.0 | 2.14E-03 |
| ADAM12                                                        | Metalloprotease; Pep M12B Propep; ZnMc SF; Disintegrin SF; ADAM CR SF                   | 4.2   | 4.78E-04 |      |          |  |  | 3.1  | 1.29E-03 |      |      |          |
| ADAM20L2*                                                     | Metalloprotease; Pep M12B Propep SF; ZnMc SF; ADAM CR SF                                | 2.9   | 2.39E-05 |      |          |  |  | 2.0  | 2.60E-03 |      |      |          |
| ADAM20L6*                                                     | Metalloprotease; Pep M12B Propep SF; ZnMc SF; ADAM CR SF                                | 6.1   | 2.85E-02 |      |          |  |  | 8.1  | 1.07E-03 |      |      |          |
| ADAM30                                                        | Metalloprotease; Pep M12B Propep; ZnMc SF; Disintegrin SF; ADAM CR SF                   |       |          |      |          |  |  |      |          | 9.6  |      | 8.58E-03 |
| ADAM32                                                        | Metalloprotease; Pep M12B Propep; ZnMc SF; Disintegrin SF; ADAM CR SF                   | 2.4   | 1.08E-02 |      |          |  |  |      |          |      |      |          |
| ADAM9                                                         | Metalloprotease; Pep M12B Propep SF; ZnMc SF; Disintegrin SF; ADAM CR SF                | 2.6   | 1.62E-07 |      |          |  |  | 1.9  | 2.26E-04 |      |      |          |
| ADAMTS1                                                       | Metalloprotease; Pep M12B Propep SF; ZnMc SF; ADAM CR SF; TSP 1 SF                      |       |          |      |          |  |  |      |          | 2.3  |      | 4.06E-04 |
| ADAMTS16                                                      | Metalloprotease; Pep M12B Propep SF; ZnMc SF; ADAM CR SF; TSP 1 SF                      | 6.6   | 2.55E-03 |      |          |  |  | 8.3  | 2.23E-05 |      |      |          |
| ADAMTS4                                                       | Metalloprotease; Pep M12B Propep SF; ZnMc SF; ADAM CR SF; TSP 1 SF                      | 2.6   | 4.92E-03 |      |          |  |  |      |          |      |      |          |
| ADAMTS7                                                       | Metalloprotease; Pep M12B Propep SF; ZnMc SF; ADAM CR SF; TSP 1 SF                      | 1.6   | 3.54E-02 |      |          |  |  |      |          |      |      |          |
| ADAMTS9                                                       | Metalloprotease; Pep M12B Propep SF; ZnMc SF; ADAM CR SF; TSP 1 SF                      | 1.7   | 4.78E-02 |      |          |  |  |      |          |      |      |          |
| B3GN7                                                         | Keratan Sulfate Biosynthesis (100739508); Galactosyl T SF                               |       |          |      |          |  |  |      |          | 6.4  |      | 1.16E-05 |
| BGN                                                           | Alarmin (24257755); Collagen Fibril Assembly; LRRNT SF                                  |       |          |      |          |  |  | 1.8  | 4.69E-02 | 2.5  |      | 1.81E-02 |
| BLM                                                           | Peptidase C1 SF                                                                         |       |          |      |          |  |  | 1.7  | 3.03E-02 |      |      |          |
| COL12A1                                                       | Collagen SF                                                                             | 2.1   | 1.41E-04 | 1.6  | 4.13E-02 |  |  |      |          |      |      |          |
| COL26A1                                                       | Collagen SF                                                                             | 7.3   | 2.71E-04 |      |          |  |  | 5.8  | 6.82E-05 |      |      |          |
| COL28A1                                                       | vWFA SF; Collagen SF; KU SF                                                             | 4.7   | 5.24E-04 |      |          |  |  | 4.0  | 1.89E-04 | 4.9  |      | 5.31E-06 |
| COL4A1                                                        | Collagen SF                                                                             | 1.7   | 1.53E-02 |      |          |  |  |      |          |      |      |          |
| COL5A2                                                        | Collagen SF                                                                             | 1.6   | 1.79E-02 |      |          |  |  |      |          |      |      |          |
| COL6A3                                                        | Collagen SF                                                                             | 1.8   | 3.31E-02 |      |          |  |  |      |          |      |      |          |
| COL7A1                                                        | Collagen SF; KU SF; vWFA SF                                                             | 2.1   | 1.26E-03 |      |          |  |  | 1.9  | 1.47E-03 |      |      |          |
| COL8A1                                                        | C1q SF; Collagen SF                                                                     | 4.1   | 1.19E-06 | 2.0  | 3.85E-02 |  |  | 2.0  | 1.40E-02 |      |      |          |
| COMP                                                          | ECM Protein; TSPcc SF; EGF CA; SF; TSP 3 SF; TSP C SF                                   |       |          |      |          |  |  |      |          |      |      |          |
| CTGF                                                          | Wound Healing (19128254); IGF1R SF; VWC SF; TSP 1 SF; GHB-like SF                       | 2.1   | 2.04E-02 |      |          |  |  |      |          |      |      |          |
| CTSG                                                          | Cathepsin; Tryp SPC SF                                                                  | 3.3   | 1.58E-02 | 7.2  | 8.45E-07 |  |  |      |          |      |      |          |
| DSE                                                           | Dermatan Sulfate Biosynthesis (19687302); DUF4962 SF                                    | 1.9   | 4.61E-03 |      |          |  |  |      |          |      |      |          |
| ECM1                                                          | ECM Protein; ECM1 SF                                                                    | 1.9   | 4.06E-03 |      |          |  |  | 1.8  | 3.23E-03 |      |      |          |
| FGF2                                                          | Wound Healing (19128254); FGF SF                                                        |       |          |      |          |  |  |      |          |      |      |          |
| FGF7                                                          | (+) Regulator of Enterocyte Differentiation (19326389); FGF SF                          | 3.2   | 4.44E-05 |      |          |  |  | 2.4  | 6.47E-04 | 2.6  |      | 5.67E-04 |
| HPN                                                           | Serine Protease (16908524); Hepsin-SRCR SF; Tryp SPC SF                                 |       |          |      |          |  |  |      |          |      |      |          |
| KRT18                                                         | Enterocyte Differentiation Marker (22943429); Intermediate Filament Protein; Keratin SF | 2.6   | 4.34E-05 |      |          |  |  | 2.0  | 1.04E-03 | 4.7  |      | 7.48E-10 |
| KRT80                                                         | Intermediate Filament Protein; Keratin SF                                               | 1.8   | 4.15E-02 |      |          |  |  |      |          |      |      |          |
| LAMB3                                                         | Basement Membrane Protein; Laminin N SF; EGF Lam SF                                     | 2.5   | 2.26E-06 |      |          |  |  | 2.4  | 1.73E-07 | 3.0  |      | 6.87E-04 |
| LAMC1                                                         | ECM Glycoprotein (22961762); Laminin N SF; Laminin B SF                                 | 1.6   | 2.40E-02 |      |          |  |  |      |          |      |      |          |
| LOXL4                                                         | Collagen Biosynthesis; SRCR SF; Lysyl Oxidase SF                                        | 2.2   | 3.47E-02 |      |          |  |  |      |          |      |      |          |
| MMP1                                                          | Metalloprotease; M1-associated (22880008); HX SF; ZnMc SF; PG-binding-1 SF              | 9.4   | 4.44E-05 |      |          |  |  | 3.1  | 2.86E-02 | 7.3  |      | 6.53E-13 |
| MMP12                                                         | Metalloprotease; Th2/M2-Associated (12842850, 22880008); HX SF; ZnMc SF                 | 101.0 | 2.26E-14 | 7.3  | 1.09E-03 |  |  | 13.9 | 7.63E-10 | 9.7  |      | 4.45E-16 |
| MMP13                                                         | Metalloprotease; M2-Associated (12842850); HX SF; ZnMc SF                               | 20.2  | 1.77E-06 |      |          |  |  | 11.4 | 2.65E-07 | 27.5 |      | 9.71E-29 |
| MMP19                                                         | Metalloprotease; HX SF; ZnMc SF; PG-binding-1 SF                                        | 1.8   | 4.54E-02 |      |          |  |  |      |          |      |      |          |
| MMP20                                                         | Metalloprotease; M2-associated (22880008); HX SF; ZnMc SF; PG-binding-1 SF              | 7.4   | 4.14E-02 |      |          |  |  |      |          |      |      |          |
| MMP3                                                          | Metalloprotease; M1-associated (22880008); HX SF; ZnMc SF; PG-binding-1 SF              | 3.5   | 3.34E-02 |      |          |  |  |      |          | 4.9  |      | 3.31E-10 |
| MMP7                                                          | Metalloprotease; M1-associated (22880008); PG binding 1 SF; ZnMc SF                     | 33.4  | 3.22E-03 |      |          |  |  | 10.5 | 7.62E-03 | 53.1 |      | 4.09E-05 |
| MMP8                                                          | Metalloprotease; M2-associated (26092731); PG binding 1 SF; ZnMc SF; HX SF              | 27.1  | 7.94E-03 |      |          |  |  | 11.4 | 3.47E-03 |      |      |          |
| MMP9                                                          | Metalloprotease; M2-associated (26377769); PG Binding 1 SF; ZnMc SF; PT SF; HX SF       | 8.9   | 1.02E-08 | 3.4  | 3.03E-03 |  |  | 2.6  | 6.92E-03 | 9.3  |      | 1.00E-02 |
| P4HA2                                                         | Positive Regulator of Collagen Biosynthesis (9211872); P4Ha N SF; ZOG-Fell Oxy 3 SF     | 1.7   | 5.38E-03 |      |          |  |  | 1.6  | 3.60E-03 |      |      |          |
| P4HA3                                                         | Positive Regulator of Collagen Biosynthesis (14500733); P4Ha N SF; ZOG-Fell Oxy 3 SF    | 4.4   | 3.89E-04 |      |          |  |  | 3.7  | 1.39E-04 |      |      |          |
| PLAUR                                                         | Wound Healing (15769664); LU SF                                                         | 4.6   | 3.65E-06 |      |          |  |  | 2.8  | 4.01E-04 | 4.8  |      | 6.11E-06 |
| PLOD1                                                         | Positive Regulator of Collagen Biosynthesis (25277362); ZOG-Fell Oxy 3 SF               |       |          |      |          |  |  |      |          |      |      |          |
| PRSS27                                                        | Wound Re-epithelialization (18948266); Tryp SPC SF                                      |       |          |      |          |  |  |      |          |      |      |          |
| PSMB7                                                         | Proteasome subunit; NTN Hydrolase SF                                                    |       |          |      |          |  |  |      |          | 1.9  |      | 7.05E-03 |
| PSMD1                                                         | PC Rep SF                                                                               | 1.5   | 3.59E-02 |      |          |  |  |      |          |      |      |          |
| PSMD14                                                        | 26S Proteasome Subunit; MPN SF                                                          |       |          |      |          |  |  |      |          |      |      |          |
| PSMD5                                                         | 26S Proteasome Subunit; PSMB SF                                                         |       |          |      |          |  |  |      |          |      |      |          |
| SERPINA1                                                      | Serine Protease Inhibitor; SERPIN SF                                                    | 4.7   | 5.81E-03 |      |          |  |  | 4.5  | 9.03E-04 |      |      |          |
| SERPINA3                                                      | Serine Protease Inhibitor; SERPIN SF                                                    |       |          |      |          |  |  |      |          |      |      |          |
| SERPINA3-2                                                    | Serine Protease Inhibitor; SERPIN SF                                                    | 60.8  | 2.96E-06 |      |          |  |  | 16.2 | 1.05E-06 |      |      |          |
| SERPINB1                                                      | Serine Protease Inhibitor; SERPIN SF                                                    | 1.6   | 3.13E-02 |      |          |  |  | 1.6  | 1.75E-02 |      |      |          |
| SERPINB10                                                     | Serine Protease Inhibitor; SERPIN SF                                                    |       |          |      |          |  |  |      |          | 3.5  |      | 2.87E-04 |
| SERPINB11                                                     | Serine Protease Inhibitor; SERPIN SF                                                    | 11.3  | 9.04E-04 |      |          |  |  | 6.3  | 3.20E-03 | 8.4  |      | 7.38E-04 |
| SERPINB2                                                      | Antiparasitic Response (23630350) M2-associated (23355731); SERPIN SF                   | 9.8   | 2.12E-04 |      |          |  |  | 3.9  | 1.24E-02 | 16.2 |      | 4.90E-32 |
| SERPINB5                                                      | Serine Protease Inhibitor; SERPIN SF                                                    | 1.9   | 8.72E-03 |      |          |  |  | 2.0  | 9.60E-04 | 2.2  |      | 1.56E-03 |
| SERPINB6                                                      | M2-associated (22393084); Serine Protease Inhibitor; SERPIN SF                          |       |          |      |          |  |  |      |          | 2.0  |      | 1.67E-02 |
| SERPINB7                                                      | Extracellular Matrix Degradation (18580857); Serine Protease Inhibitor; SERPIN SF       | 19.3  | 1.85E-02 |      |          |  |  |      |          |      |      |          |
| SERPINB8                                                      | Serine Protease Inhibitor; SERPIN SF                                                    | 2.7   | 2.47E-05 |      |          |  |  | 2.2  | 2.45E-04 | 1.8  |      | 2.66E-02 |
| SERPINE2                                                      | Serine Protease Inhibitor; SERPIN SF                                                    | 3.1   | 1.06E-04 |      |          |  |  | 2.0  | 1.59E-02 |      |      |          |
| SERPINH1                                                      | Serine Protease Inhibitor; SERPIN SF                                                    | 2.0   | 7.17E-03 | 1.8  | 4.70E-02 |  |  |      |          |      |      |          |
| SPINK4                                                        | Serine Protease Inhibitor; KAZAL SF                                                     | 6.6   | 2.11E-06 |      |          |  |  | 5.8  | 1.64E-08 | 8.1  |      | 9.43E-22 |
| SPINK6                                                        | Serine Protease Inhibitor; KAZAL SF                                                     | 46.2  | 5.38E-03 |      |          |  |  | 21.5 | 4.16E-04 |      |      |          |
| SULF2                                                         | Heparan Sulfate Endosulfatase; Sulfatase SF; DUF3740 SF                                 | 1.9   | 2.64E-02 |      |          |  |  |      |          |      |      |          |
| TFPI2                                                         | Serine Protease Inhibitor; KU SF                                                        | 1.7   | 5.42E-03 |      |          |  |  |      |          |      |      |          |
| TGM3                                                          | Transglutaminase SF                                                                     |       |          |      |          |  |  | 3.0  | 3.20E-02 | 10.0 |      | 3.03E-05 |
| TIMP1                                                         | Metalloprotease Inhibitor; M2-associated (21926236); NTR-like SF                        | 4.3   | 2.48E-09 |      |          |  |  | 2.9  | 2.65E-07 | 3.9  |      | 2.94E-04 |
| TNC                                                           | ECM Protein; FReD SF; FN3 SF                                                            | 2.9   | 8.70E-04 |      |          |  |  |      |          |      |      |          |
| TNN                                                           | ECM Protein (10842355)                                                                  | 61.3  | 4.18E-05 | 83.7 | 5.30E-05 |  |  |      |          |      |      |          |
| VCAN                                                          | ECM Protein; CLECF SF; EGF CA SF; Ig SF; Link Domain SF                                 |       |          |      |          |  |  |      |          |      |      |          |
| Pattern (PR) and Damage-associated Recognition (DR) Receptors |                                                                                         |       |          |      |          |  |  |      |          |      |      |          |
| BGN                                                           | Alarmin (24257755); LRRNT SF                                                            |       |          |      |          |  |  | 1.8  | 4.69E-02 | 2.5  |      | 1.81E-02 |
| CD14                                                          | PRR (7534618); LRR RI                                                                   | 2.1   | 1.23E-02 |      |          |  |  | 2.0  | 7.89E-03 |      |      |          |
| CD163                                                         | PRR (18849484); M2b-associated (15491976); SRCR SF                                      | 1.9   | 4.34E-02 |      |          |  |  | 1.9  | 2.29E-02 |      |      |          |
| CLEC10A                                                       | M2-associated (15591125); PRR (15802303); CLECF SF                                      | 3.6   | 2.24E-02 |      |          |  |  | 2.9  | 3.05E-02 |      |      |          |
| CLEC18A                                                       | PRR (26170455); CLECF SF                                                                | 29.5  | 7.94E-03 |      |          |  |  | 46.3 | 9.53E-05 |      |      |          |
| CLEC4D                                                        | PRR (25674984); CLECF SF                                                                | 13.4  | 4.10E-02 |      |          |  |  |      |          |      |      |          |
| DDX21                                                         | PRR (21703541); GUCC SF; DEXDc SF; EIF-3 Zeta SF                                        | 1.5   | 2.23E-02 |      |          |  |  |      |          |      |      |          |
| FCN2                                                          | Complement Activation (19632990); PRR (15331601); FReD SF                               |       |          |      |          |  |  | 2.5  | 2.74E-03 | 2.9  |      | 9.94E-05 |
| HMGGB1                                                        | Alarmin (16966386); HMG-box SF                                                          |       |          |      |          |  |  | 1.5  | 1.59E-02 |      |      |          |
| MPTX                                                          | Mucosal pentraxin; LamG SF                                                              | 5.8   | 4.12E-06 |      |          |  |  | 4.9  | 2.10E-07 | 8.3  |      | 4.03E-15 |
| SFTPD                                                         | PRR (15950451); CLECF SF                                                                | 4.1   | 2.73E-02 |      |          |  |  |      |          |      |      |          |
| SNCA                                                          | Alarmin (21747756); Synuclein SF                                                        | 2.7   | 1.40E-02 |      |          |  |  | 2.7  | 4.96E-03 |      |      |          |
| TREM1                                                         | PRR (25595774); Ig SF                                                                   | 6.4   | 4.61E-03 |      |          |  |  |      |          |      |      |          |
| TREM2                                                         | PRR (12847223); Ig SF                                                                   |       |          | -2.5 | 4.89E-02 |  |  | 3.0  | 7.72E-03 |      |      |          |
| Mast Cell Associated                                          |                                                                                         |       |          |      |          |  |  |      |          |      |      |          |

|          |                                                                                             |       |          |  |      |          |      |          |          |          |          |  |
|----------|---------------------------------------------------------------------------------------------|-------|----------|--|------|----------|------|----------|----------|----------|----------|--|
| SRGN     | Mast Cell Secretory Granule Protein (15231821); Serglycin SF                                | 1.8   | 2.61E-03 |  | 2.1  | 1.18E-05 |      |          |          |          |          |  |
| MCPT3*   | Mast Cell Protease; Tryp SpC SF                                                             | 7.3   | 2.80E-02 |  |      |          |      |          |          |          |          |  |
| TPSB2    | Mast Cell Protease; Tryp SpC SF                                                             |       |          |  |      |          |      |          |          | 2.8      | 2.68E-02 |  |
| HDC      | Biosynthesis of Histamine; Mast Cell Associated; AAT I SF                                   |       |          |  | 2.7  | 2.39E-02 |      |          |          |          |          |  |
| KIT      | (+) Positive Regulator of Mast Cell Development (25062998); Ig SF PKC-like SF               |       |          |  | 2.3  | 1.73E-02 |      |          |          |          |          |  |
|          | <b>M2-Macrophage Associated</b>                                                             |       |          |  |      |          |      |          |          |          |          |  |
| ARG1     | Antiparasitic Response (19764983); M2-associated (5879104); Arginase HDAC SF                | 122.6 | 4.56E-05 |  |      |          | 16.6 | 8.41E-04 | 30.1     | 2.28E-07 |          |  |
| CD163    | PRR (18849484); M2-associated (15491976); SRCR SF                                           | 1.9   | 4.34E-02 |  |      |          | 1.9  | 2.29E-02 |          |          |          |  |
| CHIA     | Antiparasitic Response (15618176); Th2-Associated (11553626); GH18 Chitinase Like SF        | 2.3   | 3.56E-02 |  |      |          |      |          |          |          |          |  |
| CLEC10A  | M2-associated (15591125); PRR (15802303); CLECT SF                                          | 3.6   | 2.24E-02 |  |      |          | 2.9  | 3.05E-02 |          |          |          |  |
| F13A1    | Coagulation; M2-associated (19105661); Transglutaminase SF                                  | 4.4   | 1.41E-09 |  | 2.1  | 7.07E-03 |      | 2.1      | 1.19E-03 |          |          |  |
| IL1R2    | IL1B Decoy Receptor; M2-associated (8786316); I-set SF; Ig SF                               | 10.3  | 2.46E-06 |  |      |          | 3.8  | 1.61E-03 | 6.1      | 1.51E-06 |          |  |
| IRAK3    | IL-1 Receptor-associated Kinase; M2-associated (2109822); DD SF; PKC-like SF                |       |          |  |      |          |      |          |          |          |          |  |
| IRF4     | Antiparasitic Response (20729857); M2-associated (20729857); IRF TF SF                      | 2.1   | 2.55E-03 |  |      |          |      |          |          |          |          |  |
| MMP12    | Metalloprotease; Th2/M2-Associated (12842850, 22880008); HX SF; ZnMc SF                     | 101.0 | 2.26E-14 |  | 7.3  | 1.09E-03 | 13.9 | 7.63E-10 | 9.7      | 4.45E-16 |          |  |
| MMP13    | Metalloprotease; M2-Associated (12842850); HX SF; ZnMc SF                                   | 20.2  | 1.77E-06 |  |      |          | 11.4 | 2.65E-07 | 27.5     | 9.71E-29 |          |  |
| MMP20    | Metalloprotease; M2-associated (22880008); HX SF; ZnMc SF; PG-binding-1 SF                  | 7.4   | 4.14E-02 |  |      |          |      |          |          |          |          |  |
| MMP8     | Metalloprotease; M2-associated (26092731); PG binding 1 SF; ZnMc SF; HX SF                  | 27.1  | 7.94E-03 |  |      |          | 11.4 | 3.47E-03 |          |          |          |  |
| MMP9     | Metalloprotease; M2-associated (26377769); PG Binding 1 SF; ZnMc SF; PT SF; HX SF           | 8.9   | 1.02E-08 |  | 3.4  | 3.03E-03 | 2.6  | 6.92E-03 | 9.3      | 1.00E-02 |          |  |
| ODC1     | M2-associated (19726720); Ornithine Metabolism; Polyamine Metabolism; PLPDE III SF          |       |          |  | -1.5 | 1.27E-02 | 1.6  | 4.12E-03 |          |          |          |  |
| OSM      | M2a-associated (26801095); LIF OSM SF                                                       | 4.4   | 1.92E-04 |  |      |          | 2.4  | 1.97E-02 |          |          |          |  |
| PTGS2    | Prostaglandin H2 Biosynthesis; M2-associated (28684424); EGF CA; An Peroxidase-like SF      | 2.3   | 9.54E-06 |  | 1.7  | 6.80E-03 |      |          |          |          |          |  |
| PTGS2    | Prostaglandin H2 Biosynthesis; M2-associated (28684424); EGF CA; An Peroxidase-like SF      | 6.5   | 8.39E-06 |  |      |          | 3.4  | 8.84E-04 | 4.0      | 1.30E-07 |          |  |
| SERPINB2 | Antiparasitic Response (23630350) M2-associated (23355731); SERPIN SF                       | 9.8   | 2.12E-04 |  |      |          | 3.9  | 1.24E-02 | 16.2     | 4.90E-32 |          |  |
| SERPINB6 | M2-associated (23293084); Serine Protease Inhibitor; SERPIN SF                              |       |          |  |      |          |      |          | 2.0      | 1.67E-02 |          |  |
| SLC7A2   | Arginine Transport (8954799); M2-associated (16670299); Solute Carrier SF                   | 1.9   | 4.15E-02 |  |      |          |      |          |          |          |          |  |
| TGM2     | M2-associated (23293084); Transglutaminase SF                                               | 2.2   | 3.66E-05 |  |      |          |      |          | 2.2      | 7.15E-03 |          |  |
| TIMP1    | Metalloprotease Inhibitor; M2-associated (21926236); NTR-like SF                            | 4.3   | 2.48E-09 |  |      |          | 2.9  | 2.65E-07 | 3.9      | 2.94E-04 |          |  |
| TREM2    | PRR (12847223); Ig SF                                                                       |       |          |  | -2.5 | 4.89E-02 | 3.0  | 7.72E-03 |          |          |          |  |
|          | <b>Mucus and Fluid Production</b>                                                           |       |          |  |      |          |      |          |          |          |          |  |
| A3GALT2  | Galactosyltransferase; Glyco Tranf GTA Type SF                                              | 40.6  | 5.54E-03 |  |      |          | 9.7  | 1.38E-02 |          |          |          |  |
| AGR2     | Mucin Biosynthesis (24942678); Thioredoxin-like SF                                          | 6.5   | 1.79E-05 |  |      |          | 5.7  | 6.15E-07 | 5.6      | 1.73E-11 |          |  |
| AQP3     | Glycerol Transport (16079275); Water Transport (16079275); MIP SF                           |       |          |  |      |          |      |          |          |          |          |  |
| AQP5     | Water Transporter (9195910); MIP SF                                                         | 33.5  | 4.54E-04 |  |      |          | 10.2 | 1.63E-03 |          |          |          |  |
| AQP9     | Water Transport; Glycerol Transport (19096786); MIP SF                                      | 5.3   | 1.56E-02 |  |      |          |      |          |          |          |          |  |
| B3GNT6   | Mucin Biosynthesis (26274979); Galactosyl T SF                                              | 3.0   | 2.31E-03 |  |      |          | 2.9  | 5.44E-04 | 2.3      | 7.21E-03 |          |  |
| CLCA1    | Chloride Ion Transport (8769986); Th2-associated (17898169); CLCA N SF; vWFA SF             | 3.2   | 1.07E-03 |  |      |          | 2.8  | 6.25E-04 | 3.5      | 9.80E-09 |          |  |
| FUT2     | Fucosyltransferase (24062455); Th2-associated (12652082); O-FucT-like SF                    |       |          |  |      |          |      |          | 3.1      | 1.38E-03 |          |  |
| FUT8     | Mucin Biosynthesis (28122822); O-FucT-like SF; SH3 SF                                       | 1.6   | 5.97E-03 |  |      |          |      |          |          |          |          |  |
| GALNT1   | Mucin Biosynthesis; Glyco Tranf GTA-type SF; RICIN SF                                       | 1.5   | 4.20E-02 |  |      |          |      |          |          |          |          |  |
| GALNT6   | Mucin Biosynthesis (20215525); Glyco Tranf GTA-type SF                                      | 1.7   | 1.20E-02 |  |      |          | 2.2  | 3.33E-06 | 2.5      | 5.55E-03 |          |  |
| GALNT7   | Mucin Biosynthesis Glyco Tranf GTA-type SF; RICIN SF                                        | 1.9   | 5.18E-04 |  |      |          | 1.7  | 2.49E-03 |          |          |          |  |
| GCNT3    | IL-13 Induced (17303715); Mucin Biosynthesis (20816165); Branch SF                          | 2.7   | 1.21E-03 |  |      |          | 2.1  | 7.34E-03 | 2.4      | 4.06E-04 |          |  |
| MUC2     | Secreted Gel Forming Mucin (24942678); Th2-associated (14594655); Mucin SF                  | 5.2   | 7.10E-08 |  |      |          | 3.8  | 1.60E-07 | 6.3      | 2.16E-16 |          |  |
|          | <b>Miscellaneous</b>                                                                        |       |          |  |      |          |      |          |          |          |          |  |
| ANXA8    | Anticoagulant (2530088); Annexin SF                                                         | 21.8  | 2.21E-07 |  |      |          | 7.6  | 1.18E-05 | 34.8     | 6.97E-40 |          |  |
| CHI3L1   | GH18 Chitinase Like SF                                                                      | 13.9  | 2.38E-06 |  |      |          | 5.2  | 2.51E-04 | 6.4      | 1.03E-13 |          |  |
| CHI3L2   | GH18 Chitinase Like SF                                                                      | 6.0   | 7.37E-04 |  |      |          |      |          | 4.2      | 4.97E-04 |          |  |
| CHIT1    | GH18 Chitinase Like SF                                                                      | 24.2  | 1.65E-02 |  |      |          |      |          |          |          |          |  |
| CLTC     | (-) Regulator of NF-kB Activation (21364927); Clathrin SF                                   | 1.5   | 3.32E-02 |  |      |          |      |          |          |          |          |  |
| FCGBP    | Ig Receptor; VWD SF; C8 SF; TIL SF; VWC SF                                                  | 2.3   | 2.08E-02 |  |      |          |      |          |          |          |          |  |
| GJA1     | Epithelial Wound Repair (19528242); Connexin SF; Connexin CCC SF; Connexin 43 SF            | 2.4   | 6.11E-05 |  |      |          |      |          |          |          |          |  |
| GZMA     | Tryp SpC SF                                                                                 |       |          |  | 3.0  | 4.54E-04 |      |          |          |          |          |  |
| GZMB     | Tryp SpC SF                                                                                 | 5.5   | 2.79E-04 |  | 11.2 | 8.54E-08 |      |          |          |          |          |  |
| IGH@     | Ig SF; Ig Heavy Chain Constant Region SF                                                    | 5.7   | 2.70E-05 |  |      |          | 2.6  | 1.24E-02 |          |          |          |  |
| IGHG1    | Ig SF; Ig Heavy Chain Constant Region SF                                                    | 29.1  | 1.93E-04 |  |      |          | 10.3 | 8.11E-04 | 11.1     | 3.80E-06 |          |  |
| IGJ      | Immunoglobulin J polypeptide; Ig J-Chain SF                                                 | 1.8   | 2.63E-02 |  |      |          |      |          |          |          |          |  |
| KLRJ1*   | CLECT SF                                                                                    | 10.0  | 5.18E-04 |  | 9.6  | 1.59E-03 |      |          |          |          |          |  |
| MYOF     | Membrane Regeneration and Repair; C2 SF; FerA SF; FerB SF; DysFN SF                         | 2.2   | 3.03E-05 |  |      |          | 1.9  | 1.39E-04 |          |          |          |  |
| NEUROG3  | (+) Regulator of Enteroendocrine Cell Differentiation (17706959); HLH SF                    | 5.7   | 1.61E-03 |  |      |          | 3.8  | 3.07E-03 |          |          |          |  |
| NLR3     | Inflammasome Associated (21191067); LRR RI SF; P-loop NTPase SF                             |       |          |  | 2.5  | 1.97E-02 |      |          |          |          |          |  |
| NTRK1    | Allergic Inflammation (25389033); IL-4 Induced; Ig SF; LRRCT SF                             | 42.0  | 2.62E-07 |  | 10.6 | 3.53E-03 |      |          |          |          |          |  |
| PADI1    | (-) Regulator of Inflammation (18710930); PAD SF                                            | 296.4 | 3.51E-03 |  |      |          | 51.6 | 6.25E-04 |          |          |          |  |
| PADI3    | PAD SF                                                                                      | 55.7  | 1.75E-02 |  |      |          | 19.0 | 4.69E-03 |          |          |          |  |
| PRG4     | HX SF; Somatomedin B SF                                                                     | 10.7  | 1.39E-02 |  |      |          | 13.5 | 3.43E-04 |          |          |          |  |
| S100A10  | Inflammation (16373665); S100 SF                                                            |       |          |  |      |          |      |          |          |          |          |  |
| S100A11  | RAGE Ligand (18331229); S100 SF                                                             |       |          |  |      |          | 1.5  | 3.35E-02 |          |          |          |  |
| S100A12  | RAGE Ligand (18331229); Inflammation (12740341); S100 SF                                    | 38.4  | 4.48E-04 |  |      |          | 13.4 | 7.36E-04 | 12.8     | 4.09E-05 |          |  |
| S100A2   | Eosinophil Chemoattractant (8607858); S100 SF                                               | 7.4   | 9.54E-06 |  |      |          | 4.2  | 1.75E-04 | 10.0     | 3.03E-27 |          |  |
| S100A3   | S100 SF                                                                                     | 8.0   | 6.29E-03 |  |      |          | 4.5  | 2.35E-02 |          |          |          |  |
| S100A6   | RAGE Ligand (18331229); S100 SF                                                             | 1.6   | 3.06E-02 |  |      |          | 1.6  | 1.55E-02 |          |          |          |  |
| S100A8   | RAGE Ligand; Inflammation (12645005); S100 SF                                               | 38.3  | 5.18E-04 |  |      |          | 10.8 | 2.17E-03 | 8.2      | 1.02E-02 |          |  |
| S100A9   | RAGE Ligand; Inflammation (12645005); S100 SF                                               | 44.8  | 2.59E-04 |  |      |          | 11.0 | 2.03E-03 | 9.8      | 1.83E-03 |          |  |
| SCGB2A2  | Lipophilin SF Secretoglobin SF; Uteroglobin SF                                              | 105.1 | 3.14E-07 |  |      |          | 17.9 | 4.89E-06 |          |          |          |  |
| SCGB3A1  | IL-4 Induced (16237061); Lipophilin SF Secretoglobin SF; Uteroglobin SF                     | 8.8   | 1.90E-02 |  |      |          |      |          |          |          |          |  |
| SMPDL3B  | (-) Regulator of TLR Signaling (26095358); MPP SF                                           |       |          |  |      |          |      |          | 2.0      | 1.67E-02 |          |  |
| SOCS3    | Th2-associated (11907070); Th17-associated (16698929)                                       | 2.5   | 1.07E-03 |  |      |          |      |          |          |          |          |  |
| THBD     | Th2 Associated (189478630); CLECT SF; EGF CA SF; Tme5 EGF-like SF                           | 1.8   | 2.09E-02 |  |      |          | 1.9  | 3.32E-03 |          |          |          |  |
| TIGIT    | (-) Regulator of DC Function (19011627); TFH Cell Associated (19197944); Ig SF              | 2.5   | 3.55E-03 |  | 2.8  | 3.39E-04 |      |          |          |          |          |  |
| TNIP3    | (-) Regulator of TLR4 Signaling (17088249); Tape Meas Lam C SF; BAN SF                      | 7.3   | 4.56E-05 |  |      |          | 3.5  | 3.16E-03 | 4.5      | 5.90E-06 |          |  |
| TRAIIP   | (-) Regulator of TLR Signaling (14676304); RING Ubox SF                                     |       |          |  |      |          | 1.9  | 5.08E-03 |          |          |          |  |
| VSTM1    | (-) Regulator of Monocyte/Neutrophil Function (20375307, 23436183); Ig SF                   | 2.3   | 1.95E-02 |  |      |          | 2.3  | 7.89E-03 |          |          |          |  |
| WNT7A    | Wound healing (15802269); WNT SF                                                            |       |          |  |      |          |      |          |          |          |          |  |
| XDH      | (+) Regulator of Inflammation (h) (20632067); Fer2 2 SF; CO Deh Flav C SF; Ald Xan Dh C2 SF | 22.8  | 3.03E-02 |  |      |          |      |          |          |          |          |  |
|          | <b>Neurotransmitters and Receptors</b>                                                      |       |          |  |      |          |      |          |          |          |          |  |
| ABAT     | GABA aminotransferase; AAT I SF                                                             | 2.7   | 2.61E-02 |  |      |          | 3.1  | 1.97E-03 | 3.2      | 1.73E-05 |          |  |
| AVPR1B   | Arginine Vasopressin Receptor; GPCR SF                                                      | 62.6  | 5.42E-03 |  |      |          |      |          |          |          |          |  |
| BDKRB1   | Bradykinin Receptor; GPCR SF                                                                | 4.0   | 1.65E-03 |  |      |          |      |          | 4.6      | 1.70E-02 |          |  |
| DOK7     | Postsynaptic Differentiation; PH-like SF                                                    |       |          |  |      |          |      |          |          |          |          |  |
| DRD2     | Dopamine receptor D2; Neurotransmitter Receptor; GPCR SF                                    |       |          |  |      |          |      |          |          |          |          |  |
| GABRD    | GABA Receptor; Neurotransmitter Receptor; Neur Chan LBD SF; Neur Chan Memb SF               | 2.5   | 4.65E-02 |  |      |          | 3.4  | 4.54E-04 |          |          |          |  |
| GABRP    | GABA Receptor; Neur Chan LBD SF Neur Chan Memb SF                                           |       |          |  |      |          |      |          | 15.7     | 1.59E-03 |          |  |

|          |                                                                                               |      |          |     |          |          |          |       |          |  |
|----------|-----------------------------------------------------------------------------------------------|------|----------|-----|----------|----------|----------|-------|----------|--|
| GPR83    | Neuropeptide Receptor (27117253); Treg Associated (16785516); GPCR SF                         |      |          |     |          |          |          |       |          |  |
| HTR1B    | Neurotransmitter Receptor; Serotonin Receptor; GPCR SF                                        |      |          |     |          |          |          | 11.8  | 2.40E-02 |  |
| MCHR1    | Neuropeptide Receptor; GPCR SF                                                                | 17.9 | 7.59E-03 |     |          |          |          |       |          |  |
| P2RX4    | Purinergic Receptor; Inflammation Associated (24409119); P2X Receptor SF                      | 1.5  | 4.22E-02 |     |          | 1.6      | 4.88E-03 | 2.4   | 8.14E-04 |  |
| SLC35E1  | Sodium-dependant GABA Transport; Solute Carrier SF                                            |      |          |     |          |          |          |       |          |  |
| SLC6A13  | Sodium-dependant GABA Transport; Solute Carrier SF                                            | 6.5  | 1.54E-02 |     |          |          |          |       |          |  |
| SLC6A2   | Sodium-dependent Noradrenaline Transport (2008212); Solute Carrier SF                         |      |          |     |          | 13.1     | 2.14E-02 | 18.7  | 1.53E-02 |  |
| SV2B     | Neurotransmitter Release; MF SF                                                               |      |          |     |          |          |          |       |          |  |
|          |                                                                                               |      |          |     |          |          |          |       |          |  |
|          | <b>Oxidative Stress Response</b>                                                              |      |          |     |          |          |          |       |          |  |
| GSTA1    | Glutathione S-Transferase; Thioredoxin-like SF; GST C Family SF                               |      |          |     |          |          |          | 2.7   | 4.73E-02 |  |
| GSTA2    | Glutathione S-Transferase; Thioredoxin-like SF; GST C Family SF                               |      |          |     |          |          |          | 5.4   | 4.30E-03 |  |
| GSTP1L2* | Glutathione S-Transferase; Thioredoxin-like SF; GST C Family SF                               |      |          |     |          |          |          | 6.9   | 3.53E-02 |  |
| PDIA4    | Superoxide Generation (1318337); Thioredoxin-like SF                                          | 2.3  | 1.15E-04 |     |          | 1.7      | 7.74E-03 |       |          |  |
| PRDX4    | Oxidative Stress Response (12080185); Thioredoxin-like SF                                     | 2.5  | 3.41E-05 |     |          | 1.9      | 1.03E-03 |       |          |  |
|          |                                                                                               |      |          |     |          |          |          |       |          |  |
|          | <b>Prostaglandin and Leukotriene</b>                                                          |      |          |     |          |          |          |       |          |  |
| ALOX5AP  | MAPEG SF                                                                                      |      |          | 2.0 | 3.09E-02 |          |          |       |          |  |
| LT45     | Cysteinyl Leukotriene Biosynthesis; Th2-Associated (11136826); MAPEG SF                       |      |          | 2.8 | 1.24E-02 |          |          |       |          |  |
| PTGER1   | Prostaglandin E2 Receptor; Th1 Associated (17967902); GPCR SF                                 | 2.3  | 1.21E-02 |     |          | 2.4      | 2.11E-03 |       |          |  |
| PTGER2   | Prostaglandin E2 Receptor; Inflammation (15075356); GPCR SF                                   | 1.7  | 1.84E-03 |     |          |          |          |       |          |  |
| PTGS1    | Prostaglandin E2 Biosynthesis; M2-associated (17082649); EGF CA; An Peroxidase-like SF        | 2.3  | 9.54E-06 |     | 1.7      | 6.80E-03 |          |       |          |  |
| PTGS2    | Prostaglandin H2 Biosynthesis; M2-associated (28684424); EGF CA; An Peroxidase-like SF        | 6.5  | 8.39E-06 |     |          | 3.4      | 8.84E-04 | 4.0   | 1.30E-07 |  |
| PLA2G4A  | Prostaglandin Metabolism; C2 SF; Patatin and cPLA2 SF                                         | 1.7  | 3.82E-02 |     |          |          |          |       |          |  |
|          |                                                                                               |      |          |     |          |          |          |       |          |  |
|          | <b>Surface Receptors and Ligands</b>                                                          |      |          |     |          |          |          |       |          |  |
| ADGRE1   | Th2-associated (20625511); GPCR SF                                                            |      |          |     |          | 2.8      | 3.05E-02 |       |          |  |
| ADGRE2   | (+) Regulator of Macrophage Differentiation (28421075); GPCR SF                               | 2.1  | 2.00E-02 |     |          |          |          |       |          |  |
| ADGRG6   | (+) Regulator of Angiogenesis (25217645); GPCR SF                                             | 1.9  | 2.65E-03 |     |          | 1.6      | 2.36E-02 |       |          |  |
| ADORA1   | (+) Regulator of Inflammation (8360491); GPCR SF                                              |      |          |     |          |          |          |       |          |  |
| ASGR2    | CLECT SF                                                                                      |      |          |     |          |          |          | 2.1   | 3.46E-02 |  |
| CD24     | (+) Regulator of T Cell Activation (15607804); SLAM SF Immunoglobulin SF                      | 1.8  | 4.34E-02 |     |          | 1.9      | 6.90E-03 |       |          |  |
| CD244    | (+) Regulator of T Cell Activation (15607804); SLAM SF                                        |      |          |     | 2.4      | 1.29E-02 |          |       |          |  |
| CD69     | (+) Regulator of Inflammation (16983725); CLECT SF                                            | 1.8  | 3.37E-02 |     | 2.1      | 4.85E-03 |          |       |          |  |
| CD79A    | B Cell Maturation Marker (15928681); Ig SF                                                    | 2.2  | 1.05E-02 |     |          |          |          |       |          |  |
| CDH1     | (+) Regulator of Paneth Cell Differentiation (21179475); Cadherin SF                          | 2.1  | 1.78E-04 |     |          | 1.6      | 8.68E-03 | 2.2   | 3.28E-03 |  |
| F13A1    | Coagulation; M2-associated (19105661); Transglutaminase SF                                    | 4.4  | 1.41E-09 |     | 2.1      | 7.07E-03 |          | 2.1   | 1.19E-03 |  |
| F2       | Coagulation; Th2-Associated (16081830); GPCR SF                                               |      |          |     |          |          |          |       |          |  |
| F2RL2    | Coagulation; Positive Regulator of Inflammation (12805069, 18264801); GPCR SF                 | 1.7  | 1.57E-02 |     |          |          |          |       |          |  |
| F3       | Coagulation; FN3 SF; Tissue Factor SF                                                         | 8.2  | 7.74E-11 |     |          | 5.2      | 1.85E-10 | 3.1   | 4.09E-05 |  |
| ITGA1    | T Cell Activation Marker; vWFA SF; VCBS SF; Integrin Alpha2 SF                                | 1.9  | 3.71E-02 |     |          |          |          |       |          |  |
| ITGA2    | Adhesion Molecule; VCBS SF; vWFA SF; Integrin Alpha2 SF                                       | 2.6  | 3.66E-05 |     |          | 2.2      | 1.50E-04 |       |          |  |
| ITGA8    | Integrin; VCBS Superfamily                                                                    | 2.2  | 1.15E-04 |     |          |          |          |       |          |  |
| ITGAV    | Integrin; FG-GAP Superfamily; Integrin Alpha2 Superfamily                                     | 1.7  | 7.96E-03 |     |          |          |          |       |          |  |
| ITGB1    | Integrin; vWFA Superfamily; Integrin B Cyt Superfamily; Integrin B tail Superfamily           | 1.5  | 1.80E-02 |     |          |          |          |       |          |  |
| ITGB6    | (+) Regulator of Inflammation (10025398); Integrin Beta SF; vWFA SF                           | 5.4  | 8.74E-11 |     |          | 3.1      | 2.10E-07 | 2.6   | 7.63E-03 |  |
| NECTIN1  | Adhesion Molecule; Ig SF                                                                      |      |          |     |          | 1.5      | 3.13E-02 |       |          |  |
| SELE     | Adhesion Molecule; CLECT Superfamily; EGF-CA Superfamily; CCP Superfamily                     |      |          | 2.5 | 3.53E-02 |          |          |       |          |  |
| SEMA7A   | (-) Regulator of T Cell Activation (16713976); Sema SF; PSI SF                                | 3.0  | 1.23E-05 |     |          | 2.1      | 1.51E-03 | 2.1   | 2.41E-02 |  |
|          |                                                                                               |      |          |     |          |          |          |       |          |  |
|          | <b>Transcription Factors</b>                                                                  |      |          |     |          |          |          |       |          |  |
| ARNTL2   | HLH SF; PAS SF                                                                                | 3.8  | 6.51E-06 | 2.1 | 3.38E-02 | 1.8      | 5.25E-02 |       |          |  |
| ATF4     | bZIP SF                                                                                       | 1.6  | 1.20E-02 |     |          |          |          |       |          |  |
| ATF5     | bZIP SF                                                                                       | 2.5  | 2.26E-02 |     |          |          |          |       |          |  |
| ATOX1    | (+) Regulator of Enterocyte/Enteroendocrine Cell Differentiation (17570220, 15044355); HLH SF |      |          |     |          | 1.7      | 2.37E-02 | 2.0   | 2.41E-02 |  |
| CDX1     | (+) Regulator of Enterocyte Differentiation (10579974); Caudal Act SF; Homeodomain SF         |      |          |     |          |          |          | 2.7   | 1.73E-03 |  |
| CEBPB    | Th2-Associated (16585579); bZIP SF                                                            | 2.1  | 3.29E-03 |     |          |          |          |       |          |  |
| E2F7     | E2F TDP SF                                                                                    | 1.7  | 5.49E-02 |     |          | 1.8      | 1.34E-02 |       |          |  |
| EPAS1    | HIF-1 SF                                                                                      |      |          | 1.5 | 1.29E-02 |          |          |       |          |  |
| ETV4     | ETS SF                                                                                        | 2.9  | 3.43E-04 |     |          | 2.7      | 1.36E-04 | 3.1   | 4.03E-02 |  |
| ETV5     | ETS SF                                                                                        | 1.9  | 2.26E-02 |     |          | 1.8      | 1.26E-02 |       |          |  |
| FOS      | bZIP SF                                                                                       | 2.5  | 2.09E-02 |     |          |          |          |       |          |  |
| FOXA1    | DAZAP2 SF; FH SF; HNF C SF                                                                    | 2.0  | 6.53E-03 |     |          | 1.6      | 3.80E-02 | 1.8   | 3.01E-02 |  |
| GATA2    | (+) Regulator of Eosinophil Differentiation (9279013); Znf GATA SF                            |      |          | 2.0 | 5.31E-02 |          |          |       |          |  |
| GATA3    | (+) Regulator of Th2-Cell/ILC2 Differentiation (19375293, 23733962); Znf GATA TF SF           |      |          | 4.4 | 4.43E-04 |          |          |       |          |  |
| HIF1A    | Transcription Factor; HLH SF; PAS SF; HIF-1 SF                                                | 2.4  | 9.56E-06 |     |          | 1.7      | 3.73E-03 |       |          |  |
| HOXB13   | Development; Homeodomain SF                                                                   |      |          |     |          |          |          | 132.7 | 1.59E-02 |  |
| HOXD1    | Development; Homeodomain SF                                                                   | 7.4  | 6.83E-03 |     |          | 4.6      | 9.07E-03 |       |          |  |
| IRF4     | Antiparasitic Response (20729857); M2-associated (20729857); IRF TF SF                        | 2.1  | 2.55E-03 |     |          |          |          |       |          |  |
| MAZ      | (+0 Regulator of Acute Phase Response (16888022); zf-H2C2 2 SF; RING SF                       |      |          |     |          |          |          |       |          |  |
| MKX      | Development; Homeodomain SF; IRO SF                                                           | 2.3  | 2.40E-02 |     |          |          |          |       |          |  |
| MYBL1    | SANT SF; Cmyb C SF                                                                            |      |          |     |          | 2.2      | 4.61E-02 |       |          |  |
| MYBL2    | (+) Regulator of Enterocyte Differentiation (20857481); SANT SF; Cmyb C SF                    |      |          |     |          | 1.5      | 3.16E-02 | 2.4   | 3.34E-03 |  |
| NFIL3    | (+) Regulator of ILC Development (27705792); bZIP SF                                          | 2.4  | 3.14E-09 | 1.7 | 1.50E-04 |          |          |       |          |  |
| NKX2-2   | (+) Regulator of Enteroendocrine Cell Differentiation (18022152); Homeodomain SF              | 3.3  | 5.22E-03 |     |          | 2.8      | 5.20E-03 |       |          |  |
| POU2AF1  | Transcriptional Co-activator; PD-C2-AF1 SF                                                    | 3.3  | 9.54E-06 |     |          | 2.4      | 1.75E-04 |       |          |  |
| POU5F1   | Transcription Factor; Homeodomain SF                                                          |      |          |     |          | 19.0     | 3.78E-02 |       |          |  |
| PRDM1    | (+) Regulator of Enterocyte Reprogramming (21670299); SET SF                                  | 1.6  | 2.16E-02 |     |          |          |          |       |          |  |
| RUNX3    | (+) Regulator of ILC1/ILC3 Development (26414766); Runx1 SF                                   |      |          | 2.2 | 5.12E-03 |          |          |       |          |  |
| SOX9     | (+) Regulator of Paneth Cell Differentiation (17698607); Sox N SF; HMG-box SF                 | 1.7  | 1.52E-02 |     |          |          |          |       |          |  |
| SP6      | zf-H2C2 2 SF; zf-H2C2 2 SF; COG5048 SF                                                        |      |          |     |          |          |          | 9.3   | 1.01E-02 |  |
| SPDEF    | (+) Regulator of Goblet Cell/Paneth Cell Differentiation (19786015, 19549527); ETS SF         | 4.4  | 3.89E-06 |     |          | 3.5      | 2.29E-06 | 3.0   | 1.13E-04 |  |
| TLE6     | Transcriptional Co-repressor (17624551); WD40 SF                                              | 3.0  | 6.63E-03 |     |          | 3.2      | 5.27E-04 | 4.4   | 1.34E-02 |  |
| XBP1     | B Zip1 SF                                                                                     | 2.0  | 2.73E-04 |     |          | 1.7      | 3.59E-03 |       |          |  |
| ZNF215   | Transcriptional Co-repressor; SCAN SF; KRAB A-box SF; zf-H2C2 2 SF; zf-C2H2 SF                |      |          |     |          | 2.1      | 2.39E-02 |       |          |  |
