# Supplementary material for: Molecular and metabolomic changes in the proximal colon of pigs infected with Trichuris suis
Source: PubMed Central journal article supplement (PMC7393168; doi:10.1038/s41598-020-69462-5), 2020-07-30
Supplement: 41598_2020_69462_MOESM8_ESM.pdf [file 41598_2020_69462_MOESM8_ESM.pdf]

**Molecular and metabolomic changes in the proximal colon of pigs infected with *Trichuris suis***

Harry Dawson<sup>1</sup>, Celine Chen<sup>1</sup>, Robert Li<sup>2</sup>, Lauren Nicki Bell<sup>3</sup>, Terez Shea-Donohue<sup>4</sup>, Helene Kringel<sup>5</sup>, Ethiopia Beshah<sup>1</sup>, Dolores E. Hill<sup>2</sup>, Joseph F. Urban Jr<sup>1,2</sup>.

<sup>1</sup>United States Department of Agriculture, Agricultural Research Service, Northeast Area, Beltsville Human Nutrition Research Center, Diet Genomics and Immunology Laboratory, <sup>2</sup> Beltsville Agricultural Research Center, Animal Parasitology Disease Laboratory, Beltsville, MD; <sup>3</sup>Metabolon, Inc., Morrisville, NC; <sup>4</sup>University of Maryland School of Medicine, Baltimore, MD, USA; <sup>5</sup>Department of Veterinary Disease Biology, Faculty of Health and Medical Sciences, University of Copenhagen, Copenhagen, Denmark

Supplemental Table S8

Supplemental Table S8: Clustered Down-regulation of Physiology and Immunology DEGs

| Gene                                       | Functional Categorization                                                                            | 52 DPI w worms vs Control Fold | EDGE FDR Adj p value | 52 DPI w/o worms vs Control Fold | EDGE FDR Adj p value | (52 DPI Inf w/o worms vs w Worms Fold) | EDGE FDR Adj p value | (21 DPI Inf vs Control) Fold | EDGE FDR Adj p value |
|--------------------------------------------|------------------------------------------------------------------------------------------------------|--------------------------------|----------------------|----------------------------------|----------------------|----------------------------------------|----------------------|------------------------------|----------------------|
| <b>Antigen Processing and Presentation</b> |                                                                                                      |                                |                      |                                  |                      |                                        |                      |                              |                      |
| ADAM23                                     | Positive Regulator of Antigen Presentation (27317750); ZnMc SF                                       |                                |                      |                                  |                      |                                        |                      |                              |                      |
| B2M                                        | Positive Regulator of Surface Expression of MHC Class I (16181333); Ig SF                            | -2.0                           | 5.66E-04             |                                  |                      |                                        |                      |                              |                      |
| CD74                                       | MHC Chaperone (22306692); MHC2-interact SF                                                           | -2.5                           | 2.92E-04             |                                  |                      | -2.0                                   | 7.72E-03             |                              |                      |
| CITA                                       | Positive Regulator of MHC Class I and II Expression (14678199, (11486010); LRR SF                    |                                |                      |                                  |                      | -1.7                                   | 4.54E-02             |                              |                      |
| CLEC4F                                     | Glycolipid Antigen Presentation (23762286)                                                           | -4.6                           | 4.26E-02             |                                  |                      |                                        |                      |                              |                      |
| CTSD                                       | Antigen Processing and Presentation (16920965); Pepsin Retropepsin-like SF                           |                                |                      |                                  |                      | -1.6                                   | 1.68E-02             |                              |                      |
| ERAP2                                      | Antigen Processing and Presentation (12799365); Type 2 IFN Induced (12799365); GluZincin SF          | -1.6                           | 4.60E-02             |                                  |                      |                                        |                      |                              |                      |
| LGALS3BP                                   | Antigen Processing and Presentation (15231701); SRCR SF                                              | -1.9                           | 3.18E-02             |                                  |                      |                                        |                      |                              |                      |
| PLCB2                                      | (+) Regulator of B Cell Activation (20871625); PH-like SF; EF-hand-like SF; PI-PLC GDP SF SF; C2 SF  | -2.0                           | 1.74E-03             |                                  |                      |                                        |                      |                              |                      |
| PSMB10                                     | Immunoproteasome Protease (9551082); Ntn Hydrolase SF; Pr Beta C SF                                  | -1.8                           | 3.20E-03             |                                  |                      |                                        |                      |                              |                      |
| PSMB8                                      | Immunoproteasome Protease; Ntn Hydrolase SF; Pr Beta C SF                                            | -1.6                           | 2.91E-02             |                                  |                      |                                        |                      |                              |                      |
| PSMB9                                      | Immunoproteasome Protease; Ntn Hydrolase SF; Pr Beta C SF                                            | -1.8                           | 9.65E-03             |                                  |                      |                                        |                      |                              |                      |
| PSME1                                      | Antigen Processing and Presentation (12200048); PA28 Alpha SF; PA28 Beta SF                          | -1.6                           | 5.26E-03             |                                  |                      |                                        |                      |                              |                      |
| SLA-11                                     | MHC Class I SF                                                                                       | -2.3                           | 1.08E-04             |                                  |                      | -1.6                                   | 4.46E-02             |                              |                      |
| SLA-2                                      | MHC Class I SF                                                                                       |                                |                      |                                  |                      | -1.7                                   | 5.02E-02             |                              |                      |
| SLA-3                                      | MHC Class I SF                                                                                       | -2.3                           | 1.89E-04             |                                  |                      |                                        |                      | -1.8                         | 3.72E-02             |
| SLA-8                                      | MHC Class I SF                                                                                       | -1.6                           | 1.98E-02             |                                  |                      | -1.6                                   | 4.54E-02             |                              |                      |
| SLA-DMA                                    | MHC Class II SF                                                                                      | -2.1                           | 4.61E-03             |                                  |                      |                                        |                      | -1.9                         | 1.99E-02             |
| SLA-DMB                                    | MHC Class II SF                                                                                      | -2.2                           | 8.10E-04             |                                  |                      | -1.7                                   | 2.70E-02             | -2.4                         | 3.61E-04             |
| SLA-DOA                                    | MHC Class II SF                                                                                      | -2.4                           | 3.71E-03             |                                  |                      |                                        |                      |                              |                      |
| SLA-DQA1                                   | MHC Class II SF                                                                                      | -2.3                           | 3.27E-03             |                                  |                      | -2.0                                   | 1.33E-02             |                              |                      |
| SLA-DQB1                                   | MHC Class II SF                                                                                      | -2.3                           | 1.13E-02             |                                  |                      |                                        |                      | -2.5                         | 1.55E-03             |
| SLA-DRA                                    | MHC Class II SF                                                                                      | -2.4                           | 1.06E-03             |                                  |                      | -2.1                                   | 5.53E-03             |                              |                      |
| SLA-DRB1                                   | MHC Class II SF                                                                                      | -2.2                           | 5.60E-03             |                                  |                      | -2.0                                   | 1.25E-02             |                              |                      |
| TAP1                                       | Peptide Transporter; ABC Membrane SF                                                                 | -1.9                           | 5.73E-03             |                                  |                      | -1.7                                   | 2.23E-02             |                              |                      |
| TAP2                                       | Peptide Transporter; ABC Membrane SF                                                                 | -1.6                           | 1.31E-02             |                                  |                      |                                        |                      |                              |                      |
| <b>Cytokines, Chemokines and Receptors</b> |                                                                                                      |                                |                      |                                  |                      |                                        |                      |                              |                      |
| ADIPOQ                                     | Adipocytokine; C1q SF                                                                                | -4.2                           | 5.00E-04             |                                  |                      |                                        |                      | -2.2                         | 4.06E-03             |
| ANGPTL4                                    | Adipocytokine; FReD SF                                                                               | -2.9                           | 1.19E-03             | -2.0                             | 4.70E-02             |                                        |                      |                              |                      |
| BMP3                                       | Bone Morphogenetic Protein (BMP) Family; TGFβ SF                                                     |                                |                      |                                  |                      |                                        |                      | -2.5                         | 2.94E-03             |
| CCL2                                       | CCR2 Ligand; CCL Chemokine SF                                                                        |                                |                      |                                  |                      |                                        |                      | -2.0                         | 1.38E-03             |
| CCL21                                      | CCR7 Ligand; CCL Chemokine SF                                                                        | -1.7                           | 4.86E-02             |                                  |                      |                                        |                      |                              |                      |
| CCL3L1                                     | CCL Chemokine SF                                                                                     |                                |                      |                                  |                      |                                        |                      | -5.6                         | 2.84E-03             |
| CCL3L2                                     | CCL Chemokine SF                                                                                     | -5.4                           | 6.08E-03             |                                  |                      |                                        |                      | -10.6                        | 5.90E-03             |
| CCL4                                       | CCR5 Ligand; CCL Chemokine SF                                                                        | -2.4                           | 1.16E-02             |                                  |                      |                                        |                      |                              |                      |
| CCL8                                       | CCR1 Ligand; CCL Chemokine SF                                                                        | -2.6                           | 7.80E-03             |                                  |                      |                                        |                      | -2.8                         | 4.24E-02             |
| CCR5                                       | CCL3 Receptor; CCL4 Receptor; CCL5 Receptor; CCL Chemokine Receptor SF                               | -1.8                           | 5.37E-03             |                                  |                      |                                        |                      |                              |                      |
| CCR9                                       | CCL25 Receptor; CCL Chemokine Receptor                                                               | -3.0                           | 5.47E-02             |                                  |                      |                                        |                      | -5.8                         | 1.14E-02             |
| CNTRF                                      | Cytokine Receptor (10812968); FN3 SF; Ig SF                                                          | -3.5                           | 4.40E-04             |                                  |                      | -2.9                                   | 3.11E-03             |                              |                      |
| CSF1                                       | Cytokine; Positive Regulator of Macrophage Development.                                              | -1.5                           | 3.58E-02             |                                  |                      | -1.5                                   | 1.68E-02             |                              |                      |
| CSF1R                                      | CSF1 Receptor                                                                                        | -1.7                           | 3.70E-03             |                                  |                      | -1.5                                   | 4.54E-02             |                              |                      |
| CSF2RB                                     | GM-CSF/IL-3/IL-5 receptor Common Beta-Chain; Erythropoietin Receptor SF; FN3 SF; IL6Ra-bind SF       |                                |                      |                                  |                      | -1.5                                   | 4.36E-02             |                              |                      |
| CXCL10                                     | Type 2 IFN Induced; CXCR3 Ligand; CXC Chemokine SF                                                   | -3.4                           | 3.22E-02             |                                  |                      | -4.4                                   | 7.18E-03             |                              |                      |
| CXCL11                                     | Type 2 IFN Induced; CXCR3 Ligand; CXC Chemokine SF                                                   | -4.8                           | 3.33E-02             |                                  |                      |                                        |                      |                              |                      |
| CXCL12                                     | CXCR4 Ligand; CXC Chemokine SF                                                                       | -2.7                           | 6.31E-04             |                                  |                      | -2.8                                   | 2.48E-04             | -2.3                         | 5.03E-03             |
| CXCL13                                     | CCL10 Ligand; CXCR5 Ligand; CXC Chemokine SF                                                         |                                |                      |                                  |                      |                                        |                      | -5.8                         | 5.77E-08             |
| CXCL9                                      | Type 2 IFN Induced; CXCR3 Ligand; CXC Chemokine SF                                                   | -7.5                           | 6.02E-04             |                                  |                      | -5.7                                   | 3.65E-03             | -6.1                         | 7.08E-08             |
| CXCR3                                      | CXCL9 Receptor; CXCL10 Receptor; CXCL11 Receptor; CXCL Chemokine Receptor SF                         | -2.2                           | 1.38E-02             |                                  |                      |                                        |                      |                              |                      |
| EBI3                                       | FN3 SF                                                                                               | -2.0                           | 4.52E-02             |                                  |                      |                                        |                      |                              |                      |
| FLT3LG                                     | Flt3 Lig SF                                                                                          | -1.8                           | 3.71E-03             |                                  |                      |                                        |                      |                              |                      |
| GDF5                                       | Bone Morphogenetic Protein (BMP) Family; TGFβ SF                                                     | -3.8                           | 1.25E-02             | -3.3                             | 1.09E-03             |                                        |                      |                              |                      |
| IGF2                                       | IIGF-like SF                                                                                         | -3.2                           | 5.66E-04             |                                  |                      | -2.2                                   | 2.80E-02             |                              |                      |
| IL10RA                                     | Cytokine Receptor; Interferon-binding SF                                                             | -1.9                           | 8.53E-04             |                                  |                      | -1.5                                   | 3.17E-02             |                              |                      |
| IL12B                                      | Cytokine; IL12p40 SF                                                                                 | -4.7                           | 1.02E-02             |                                  |                      |                                        |                      |                              |                      |
| IL12RB2                                    | IL-12 Receptor; Th1-Associated (10666772); Lep Receptor Ig SF                                        | -2.3                           | 4.34E-02             |                                  |                      |                                        |                      |                              |                      |
| IL15                                       | Th1-Associated (12759422); IL15 SF; IL2G Receptor Binding SF                                         |                                |                      |                                  |                      |                                        |                      | -2.7                         | 3.09E-02             |
| IL17RA                                     | IL-17 Receptor; TIR 2 SF                                                                             | -1.5                           | 1.36E-02             |                                  |                      |                                        |                      |                              |                      |
| IL2RB                                      | IL2 Receptor; IL15 Receptor; FN3 SF                                                                  |                                |                      |                                  |                      | -1.7                                   | 2.69E-02             |                              |                      |
| IL34                                       | Cytokine; IL34 SF                                                                                    | -2.5                           | 3.63E-04             |                                  |                      | -2.1                                   | 4.12E-03             |                              |                      |
| KIT                                        | Ig SF; PKC-like SF                                                                                   |                                |                      |                                  |                      |                                        |                      | -2.3                         | 2.04E-02             |
| LIFR                                       | LIF Receptor; FN3 SF                                                                                 | -2.1                           | 4.05E-04             |                                  |                      | -1.7                                   | 7.18E-03             | -2.6                         | 3.03E-05             |
| LTBP3                                      | TGFβ Binding Protein EGF CA SF                                                                       | -1.6                           | 4.59E-02             |                                  |                      |                                        |                      |                              |                      |
| LTBP4                                      | TGFβ Binding Protein EGF CA SF                                                                       | -2.2                           | 9.11E-05             |                                  |                      | -1.8                                   | 5.61E-03             |                              |                      |
| MDK                                        | Cytokine; (+) Regulator of Inflammation (30217121); PTN MK N SF                                      | -2.0                           | 1.75E-02             |                                  |                      |                                        |                      |                              |                      |
| PDGFC                                      | Angiogenesis (20566880); CUB SF; PDGF SF                                                             |                                |                      |                                  |                      |                                        |                      | -2.3                         | 2.70E-03             |
| PF4                                        | CXC Chemokine SF                                                                                     |                                |                      |                                  |                      |                                        |                      | -3.2                         | 1.71E-02             |
| PGF                                        | PDGF SF                                                                                              | -1.9                           | 4.93E-02             |                                  |                      |                                        |                      |                              |                      |
| RARRES2                                    | Adipocytokine (17767914)                                                                             | -1.6                           | 4.83E-02             |                                  |                      |                                        |                      |                              |                      |
| THNSL2                                     | Cytokine (19877052); Trp-synth-beta II SF                                                            | -2.3                           | 1.15E-03             |                                  |                      |                                        |                      |                              |                      |
| TNFSF11                                    | Positive Regulator of Microfold Cell Differentiation (22778137); TH1-Associated (14607948); TNF SF   |                                |                      |                                  |                      |                                        |                      | -4.0                         | 1.83E-03             |
| TNFSF13B                                   | (+) Regulator of B Cell Activation (16797504); Th1-Associated (15843552); TNF SF                     |                                |                      |                                  |                      |                                        |                      | -2.5                         | 2.69E-04             |
| XCL1                                       | Th1-associated (14573634); XCR1 Receptor Ligand                                                      | -5.2                           | 1.96E-06             |                                  |                      | -2.7                                   | 5.72E-03             | -3.3                         | 3.63E-03             |
| <b>Extracellular Matrix and Remodeling</b> |                                                                                                      |                                |                      |                                  |                      |                                        |                      |                              |                      |
| ADAM1A                                     | Matelloprotease; Pep M12B Propep SF; ZnMc SF; Reprolysin SF; Disintegrin SF; ADAM CR SF              |                                |                      |                                  |                      |                                        |                      | -52.9                        | 1.87E-02             |
| ADAMTS19                                   | Matelloprotease; TSP 1 SF                                                                            |                                |                      |                                  |                      |                                        |                      | -2.6                         | 1.33E-02             |
| ADAMTS5                                    | Matelloprotease; Pep M12B Propep SF; ZnMc SF; TSP 1 SF; ADAM Spacer1 SF                              |                                |                      |                                  |                      |                                        |                      | -2.2                         | 1.84E-02             |
| ADAMTS8                                    | Matelloprotease; TSP 1 SF                                                                            |                                |                      |                                  |                      | -1.9                                   | 1.07E-02             |                              |                      |
| ADAMTSL5                                   | Matelloprotease; TSP 1 SF                                                                            | -2.1                           | 3.76E-02             |                                  |                      |                                        |                      |                              |                      |
| ANPEP                                      | Aminopeptidase; GluZincin SF                                                                         | -5.2                           | 3.11E-04             | -2.5                             | 4.13E-02             |                                        |                      |                              |                      |
| ASTL                                       | Matelloprotease (15087446); ZnMc SF                                                                  | -37.2                          | 2.34E-02             |                                  |                      |                                        |                      | -49.0                        | 2.75E-02             |
| BSG                                        | Extracellular Matrix Remodeling (26084217); Treg-associated (23665204); Ig SF; KU SF                 |                                |                      |                                  |                      | -1.5                                   | 2.27E-02             |                              |                      |
| COL1A1                                     | Collagen SF                                                                                          |                                |                      |                                  |                      |                                        |                      | -1.7                         | 3.72E-02             |
| COL22A1                                    | Collagen SF                                                                                          |                                |                      |                                  |                      |                                        |                      | -56.8                        | 1.34E-02             |
| COL25A1                                    | Collagen SF                                                                                          |                                |                      |                                  |                      |                                        |                      | -5.6                         | 7.28E-04             |
| COL4A3                                     | Collagen SF                                                                                          | -2.4                           | 4.44E-02             |                                  |                      |                                        |                      |                              |                      |
| COL4A6                                     | Collagen SF                                                                                          | -1.6                           | 3.19E-02             |                                  |                      | -1.6                                   | 4.50E-02             |                              |                      |
| COL6A5                                     | Collagen SF                                                                                          |                                |                      |                                  |                      |                                        |                      | -2.0                         | 1.50E-02             |
| COL6A6                                     | Collagen SF                                                                                          | -7.8                           | 1.07E-07             |                                  |                      | -5.7                                   | 3.03E-06             | -5.7                         | 3.51E-08             |
| CST3                                       | Cysteine Protease Inhibitor; Extracellular Matrix Formation/Degradation (19468292); Cystatin (CY) SF |                                |                      |                                  |                      | -1.9                                   | 7.80E-03             | -2.3                         | 3.93E-04             |
| CSTA                                       | Protease Inhibitor; CY SF                                                                            | -1.9                           | 2.56E-02             |                                  |                      |                                        |                      |                              |                      |
| CTBS                                       | Asn-linked Glycoprotein Catabolism; GH18 Chitinase-like SF                                           | -3.6                           | 8.38E-03             |                                  |                      | -2.9                                   | 4.10E-02             |                              |                      |







|           |                                                                                                      |       |          |  |  |  |  |       |          |      |          |
|-----------|------------------------------------------------------------------------------------------------------|-------|----------|--|--|--|--|-------|----------|------|----------|
| IFI27     | Type 1 IFN Induced (20939681); Antiviral Response (27194766); Ifi-6-16 SF                            | -5.8  | 7.91E-04 |  |  |  |  | -3.9  | 1.12E-02 |      |          |
| IFI44     | Type 1 IFN Induced (7925411); Antiviral Immune Response (22896602); TLD SF                           | -2.9  | 1.80E-02 |  |  |  |  | -2.7  | 2.55E-02 |      |          |
| IFI44L    | Type 1 IFN Induced (21478870); Antigen Processing and Presentation (11021531); Ras-like GTPase SF    | -2.3  | 3.75E-03 |  |  |  |  | -2.0  | 1.59E-02 |      |          |
| IFITM1    | Type 1 IFN Induced (14980080); Antiviral Immune Response (22344284); CD225 SF                        | -2.6  | 1.45E-02 |  |  |  |  |       |          |      |          |
| IFITM1L2* | CD225 SF                                                                                             | -2.3  | 6.10E-05 |  |  |  |  | -1.7  | 8.91E-03 |      |          |
| IRF8      | Type 1 IFN-Induced; Type 1 IFN Signaling (15864272); IRF SF; IRF4 Subfamily (11997525)               | -1.6  | 1.94E-02 |  |  |  |  |       |          |      |          |
| MAP2K6    | Type 1 IFN Induced (15644321); Antiviral Response (15229216); PKC-like SF                            | -1.8  | 3.77E-02 |  |  |  |  | -1.8  | 4.90E-02 |      |          |
| MOV10     | Type 1 IFN Induced (21478870); Antiviral Response (26842467); AAA 11 SF; UvrD C 2 SF                 | -1.7  | 1.22E-03 |  |  |  |  | -1.5  | 1.20E-02 |      |          |
| MPEG1     | Type 1 and 2 IFN Induced (23257510); Antibacterial Responses (23257510); MACPF SF                    | -2.2  | 4.93E-03 |  |  |  |  | -2.1  | 5.72E-03 | -2.1 | 7.99E-03 |
| OASL      | Type 1 IFN-Induced (10087211); Antiviral Response (22531715); NT Pol-beta-like SF; OAS1 C SF; UBQ SF | -14.4 | 5.68E-03 |  |  |  |  | -12.1 | 1.20E-02 |      |          |
| PARP9     | Type 2 IFN Induced (16809771); Antiviral Response (26479788); Macro SF; ADP Ribosyl SF               |       |          |  |  |  |  | -1.9  | 1.04E-03 |      |          |
| RNF213    | Type 1 IFN Induced (10547268); RING Ubox SF                                                          | -1.8  | 4.61E-02 |  |  |  |  | -1.8  | 3.66E-02 |      |          |
| RSAD2     | Type 1 IFN-induced (9391139); Antiviral Immune Response (20308629, 22377585); Viperin SF             | -4.4  | 2.06E-02 |  |  |  |  | -4.3  | 2.28E-02 |      |          |
| THAP12    | Type 1 IFN Induced (21910972); Antiviral Response (21910972); THAP SF; Dimer Tnp hAT SF              | -10.5 | 4.27E-02 |  |  |  |  | -13.4 | 2.27E-02 |      |          |
