# Supplementary material for: Molecular and metabolomic changes in the proximal colon of pigs infected with Trichuris suis
Source: PubMed Central journal article supplement (PMC7393168; doi:10.1038/s41598-020-69462-5), 2020-07-30
Supplement: 41598_2020_69462_MOESM9_ESM.pdf [file 41598_2020_69462_MOESM9_ESM.pdf]

**Molecular and metabolomic changes in the proximal colon of pigs infected with *Trichuris suis***

Harry Dawson<sup>1</sup>, Celine Chen<sup>1</sup>, Robert Li<sup>2</sup>, Lauren Nicki Bell<sup>3</sup>, Terez Shea-Donohue<sup>4</sup>, Helene Kringel<sup>5</sup>, Ethiopia Beshah<sup>1</sup>, Dolores E. Hill<sup>2</sup>, Joseph F. Urban Jr<sup>1,2</sup>.

<sup>1</sup>United States Department of Agriculture, Agricultural Research Service, Northeast Area, Beltsville Human Nutrition Research Center, Diet Genomics and Immunology Laboratory, <sup>2</sup> Beltsville Agricultural Research Center, Animal Parasitology Disease Laboratory, Beltsville, MD; <sup>3</sup>Metabolon, Inc., Morrisville, NC; <sup>4</sup>University of Maryland School of Medicine, Baltimore, MD, USA; <sup>5</sup>Department of Veterinary Disease Biology, Faculty of Health and Medical Sciences, University of Copenhagen, Copenhagen, Denmark

Supplemental Table S9

Supplemental Table S9: Clustered Metabolism Genes (DEGs) Up-regulated

| Gene                                        | Functional Categorization                                                                        | S2 DPI w<br>vs Control<br>Fold | EDGE<br>FDR Adj p<br>value | S2 DPI w/o<br>worms vs Control<br>Fold | EDGE FDR<br>Adj p<br>value | (S2 DPI Inf<br>w/o worms<br>vs Worms<br>Fold | EDGE FDR<br>Adj p<br>value | (21 DPI Inf<br>vs Control)<br>Fold | EDGE FDR<br>Adj p value |
|---------------------------------------------|--------------------------------------------------------------------------------------------------|--------------------------------|----------------------------|----------------------------------------|----------------------------|----------------------------------------------|----------------------------|------------------------------------|-------------------------|
| <b>Amino Acid Metabolism or Transport</b>   |                                                                                                  |                                |                            |                                        |                            |                                              |                            |                                    |                         |
| ARG1                                        | Arginine Metabolism (3540966); M2-associated (5879104); Arginase HDAC SF                         | 122.6                          | 4.56E-05                   |                                        |                            | 16.6                                         | 8.41E-04                   |                                    |                         |
| ARG2                                        | Arginine Metabolism (16128822); Arginase HDAC SF                                                 | 1.7                            | 3.31E-02                   |                                        |                            | 1.6                                          | 2.16E-02                   |                                    |                         |
| BCAT1                                       | BCAA Catabolism (6933702); Glycolysis (28699638); PRK13357 SF                                    | 2.4                            | 4.81E-04                   |                                        |                            | 1.9                                          | 5.18E-03                   |                                    |                         |
| CBS                                         | Cysteine Metabolism (19010420); Serine Metabolism; Trp-synth-beta II SF; CBS Pair SF             | 3.4                            | 1.61E-03                   |                                        |                            | 3.5                                          | 7.42E-05                   | 5.5                                | 7.18E-05                |
| GNMT                                        | Homocysteine Metabolism (21411609); AdoMet MTases SF                                             |                                |                            |                                        |                            |                                              |                            | 4.3                                | 2.10E-02                |
| IL4I1L                                      | Putative L-amino acid oxidase; SDR SF                                                            | 161.2                          | 3.98E-05                   |                                        |                            | 26.0                                         | 1.39E-04                   | 437.7                              | 1.59E-14                |
| ODC1                                        | M2-associated (19726720); Ornithine Metabolism (2317811); Polyamine Metabolism; PLPDE III SF     |                                |                            | -1.5                                   | 1.27E-02                   | 1.6                                          | 4.12E-03                   |                                    |                         |
| PHGDH                                       | Serine Biosynthesis (27110680); SerA SF                                                          | 5.1                            | 3.92E-05                   |                                        |                            | 3.3                                          | 5.01E-04                   | 5.0                                | 9.01E-04                |
| PSAT1                                       | Serine Biosynthesis (12633500); AAT I SF                                                         | 7.2                            | 3.12E-04                   |                                        |                            | 3.9                                          | 3.89E-03                   | 20.6                               | 4.69E-11                |
| SDSL                                        | Serine Metabolism (16580895); Threonine Metabolism (16580895); Trp Synth beta II SF              | 39.6                           | 1.38E-02                   |                                        |                            |                                              |                            |                                    |                         |
| SHMT2                                       | Glycine Biosynthesis (25619277); Folate Biosynthesis; Serine Biosynthesis                        | 2.0                            | 2.65E-05                   |                                        |                            | 1.5                                          | 1.06E-02                   |                                    |                         |
| SLC12A8                                     | Amino Acid Transport (19472210); Polyamine Transport (19472210); Solute Carrier SF               | 3.5                            | 7.40E-04                   |                                        |                            | 3.1                                          | 3.65E-04                   |                                    |                         |
| SLC16A10                                    | Phenylalanine/Tryptophan/Tyrosine Transport (23045339); Solute Carrier SF                        | 1.8                            | 3.61E-02                   |                                        |                            |                                              |                            |                                    |                         |
| SLC1A2                                      | Glutamate Transport (7521911); SDF SF; Solute Carrier SF                                         | 3.0                            | 2.04E-03                   |                                        |                            | 2.1                                          | 2.44E-02                   |                                    |                         |
| SLC1A4                                      | Alanine/Cysteine/Proline Transport (8101838, 11824937; 14502423); Solute Carrier SF              | 2.5                            | 1.36E-03                   |                                        |                            |                                              |                            |                                    |                         |
| SLC1A5                                      | Glutamate/Glutamine Transport (21757002); Solute Carrier SF                                      | 1.8                            | 8.53E-04                   |                                        |                            | 1.6                                          | 5.72E-03                   |                                    |                         |
| SLC38A2                                     | Alanine/Asparagine/Cysteine/Glutamine Transport (12845534); Solute Carrier SF                    | 1.8                            | 2.90E-02                   |                                        |                            |                                              |                            |                                    |                         |
| SLC3A2                                      | BCAA Transport (9751058); Tryptophan Transport; Tyrosine Transport; Solute Carrier SF            | 1.8                            | 1.83E-03                   |                                        |                            |                                              |                            |                                    |                         |
| SLC6A9                                      | Glycine Transport (8183239); Solute Carrier SF                                                   | 1.8                            | 1.29E-02                   |                                        |                            |                                              |                            |                                    |                         |
| SLC7A1                                      | Arginine Transport (21302286); Lysine Transport (21302286); Solute Carrier SF                    | 1.6                            | 1.25E-02                   |                                        |                            | 1.5                                          | 3.05E-02                   |                                    |                         |
| SLC7A11                                     | Cystine Transport (10206947); Glutamate Transport (10206947); Solute Carrier SF                  |                                |                            |                                        |                            | 3.7                                          | 3.60E-02                   | 4.3                                | 6.75E-07                |
| SLC7A2                                      | Arginine Transport (8954799); M2-associated (16670299); Solute Carrier SF                        | 1.9                            | 4.15E-02                   |                                        |                            |                                              |                            |                                    |                         |
| SLC7A311*                                   | Putative Amino Acid Transporter; Solute Carrier SF                                               |                                |                            |                                        |                            |                                              |                            | 188.2                              | 1.59E-03                |
| SLC7A5                                      | BCAA Transport (9751058); Solute Carrier SF                                                      | 2.7                            | 7.21E-06                   |                                        |                            | 1.9                                          | 1.40E-03                   | 3.3                                | 1.30E-03                |
| SLC7A6                                      | Arginine Transport (19562367); Solute Carrier SF                                                 | 1.7                            | 2.15E-03                   |                                        |                            |                                              |                            |                                    |                         |
| SLC9C1                                      | Sodium-hydrogen Exchanger (14634667); Solute Carrier SF                                          |                                |                            |                                        |                            |                                              |                            | 4.1                                | 7.81E-04                |
| TAT                                         | Bioconversion of L-Tyrosine into p-Hydroxyphenylpyruvate; AAT I SF                               | 4.2                            | 4.00E-02                   |                                        |                            |                                              |                            | 6.9                                | 3.49E-02                |
| <b>Carbohydrate Metabolism or Transport</b> |                                                                                                  |                                |                            |                                        |                            |                                              |                            |                                    |                         |
| AACS                                        | Biosynthesis of Acetyl-Coenzyme A (20102333); AFD Class I SF                                     | 2.0                            | 4.99E-05                   |                                        |                            | 1.8                                          | 1.18E-04                   |                                    |                         |
| ACAT2                                       | Biosynthesis of Acetyl-Coenzyme A; Thiolase N SF                                                 | 3.5                            | 1.27E-10                   |                                        |                            | 2.5                                          | 4.51E-08                   |                                    |                         |
| ACLY                                        | Glycolysis; Lipid Biosynthesis (23932781); TCA Cycle; CCL SF                                     | 2.2                            | 5.17E-06                   |                                        |                            | 1.9                                          | 1.76E-05                   |                                    |                         |
| ALDOC                                       | Fructose Metabolism; Glycolysis; Aldolase Class I SF                                             | 1.6                            | 5.08E-02                   |                                        |                            | 1.7                                          | 1.06E-02                   |                                    |                         |
| BCAT1                                       | Glycolysis (28699638); PRK13357 SF                                                               | 2.4                            | 4.81E-04                   |                                        |                            | 1.9                                          | 5.18E-03                   |                                    |                         |
| DERL3                                       | Negative Regulator of SLC2A1 Expression (24699711); DER1 SF                                      | 2.2                            | 2.74E-04                   |                                        |                            | 1.7                                          | 7.70E-03                   |                                    |                         |
| GFPT1                                       | Biosynthesis of Glucosamine 6-phosphate (1460020); Gn AT II SF; SIS SF                           | 2.2                            | 1.21E-05                   |                                        |                            | 1.7                                          | 3.70E-03                   |                                    |                         |
| GS2                                         | Glycogen Synthase SF                                                                             |                                |                            |                                        |                            | 6.0                                          | 4.66E-02                   | 11.9                               | 5.62E-03                |
| PKC2                                        | Gluconeogenesis; Biosynthesis of Phosphoenolpyruvate (4291786); TCA Cycle; PEPCk HprK SF         | 2.0                            | 1.77E-03                   |                                        |                            | 2.0                                          | 3.22E-04                   |                                    |                         |
| HK2                                         | Glycolysis; Biosynthesis of Glucose-6-phosphate (19558793); NBD Sugar Kinase SF; Hexokinase 2 SF | 8.6                            | 2.40E-06                   |                                        |                            | 4.2                                          | 1.78E-04                   | 3.3                                | 1.33E-05                |
| PFKFB2                                      | Biosynthesis of Fructose-2,6-bisphosphate; Glycolysis; P-loop NTPase SF; HP SF                   | 1.9                            | 3.58E-02                   |                                        |                            |                                              |                            |                                    |                         |
| PFKFB3                                      | Biosynthesis of Fructose-2,6-bisphosphate; Glycolysis; P-loop NTPase SF; HP SF                   | 3.2                            | 4.64E-06                   |                                        |                            | 2.2                                          | 5.86E-04                   | 2.5                                | 7.15E-03                |
| PGK1                                        | Biosynthesis of 3-phosphoglycerate; Glycolysis; Phosphoglycerate Kinase SF                       | 1.8                            | 1.24E-03                   |                                        |                            | 1.5                                          | 1.73E-02                   |                                    |                         |
| PGM2                                        | Biosynthesis of Ribose 5-phosphate; Glycolysis (17804405); Phosphohexomutase SF                  | 1.6                            | 7.93E-03                   |                                        |                            |                                              |                            |                                    |                         |
| PGM3                                        | Biosynthesis of UDP-N-acetylglucosamine (11004509); Phosphohexomutase SF                         | 2.1                            | 7.37E-05                   |                                        |                            | 1.8                                          | 9.17E-04                   |                                    |                         |
| PKM                                         | Biosynthesis of Pyruvate; Glycolysis (12843653); Pyruvate Kinase SF                              | 1.9                            | 3.11E-04                   |                                        |                            | 1.7                                          | 1.40E-03                   | 2.2                                | 2.62E-02                |
| SDS                                         | Biosynthesis of Pyruvate; Glycolysis; Serine/Threonine Catabolism; Trp Synth Beta II SF          | 5.6                            | 1.53E-02                   |                                        |                            |                                              |                            | 5.7                                | 8.06E-05                |
| SLC25A35                                    | Isopropylmalate Transport (18682385); Solute Carrier SF                                          |                                |                            |                                        |                            | 2.0                                          | 9.64E-03                   |                                    |                         |
| SLC2A3                                      | Glucose Transport (20209635); Solute Carrier SF                                                  | 3.4                            | 1.42E-12                   | 2.7                                    | 1.71E-10                   |                                              |                            |                                    |                         |
| SLC37A3                                     | Glucose-6-phosphate Transport (21949678); Solute Carrier SF                                      | 1.5                            | 7.96E-03                   |                                        |                            |                                              |                            |                                    |                         |
| SLC50A1                                     | Glucose Transport (23506865); Solute Carrier SF                                                  |                                |                            |                                        |                            | 1.8                                          | 9.18E-04                   |                                    |                         |
| SLC5A1                                      | Glucose/Fructose/Mannose Transport (22212718); Solute Carrier SF                                 | 2.2                            | 2.73E-04                   |                                        |                            | 1.7                                          | 6.38E-03                   |                                    |                         |
| TKTL1                                       | Glycolysis (26273330)                                                                            |                                |                            | 6.4                                    | 1.49E-02                   |                                              |                            |                                    |                         |
| <b>Lipid Metabolism or Transport</b>        |                                                                                                  |                                |                            |                                        |                            |                                              |                            |                                    |                         |
| ABCA12                                      | Cholesterol Transport (23931754); ABC ATPase SF                                                  | 4.1                            | 1.91E-03                   |                                        |                            |                                              |                            | 2.3                                | 4.40E-02                |
| ABCA5                                       | Macrophage Cholesterol Metabolism (20382126); ABC ATPase SF                                      | 2.0                            | 4.93E-03                   |                                        |                            |                                              |                            |                                    |                         |
| ACACA                                       | Fatty Acid Biosynthesis (20457939); Acetyl-CoA Carboxylase SF; Biotinyl-lipoyl Domains SF        | 1.6                            | 4.83E-03                   |                                        |                            |                                              |                            |                                    |                         |
| ACSL3                                       | Fatty Acyl-CoA Ester Biosynthesis; AFD Class I SF; Acyl-CoA Synthetase SF                        | 2.0                            | 8.07E-05                   |                                        |                            | 1.7                                          | 2.03E-03                   |                                    |                         |
| ACSL4                                       | Fatty Acyl-CoA Ester Biosynthesis; AFD Class I SF; Acyl-CoA Synthetase SF                        | 1.5                            | 3.29E-02                   |                                        |                            |                                              |                            |                                    |                         |
| AOAH                                        | Lipid Metabolism (1883828); SGNH Hydrolase SF; SapB 2 SF                                         | 1.6                            | 5.28E-02                   | 1.7                                    | 2.02E-02                   |                                              |                            |                                    |                         |
| APOBR                                       | Lipoprotein Receptor; Neuromodulin N SF; Na Ca Ex SF                                             |                                |                            | 1.7                                    | 3.48E-02                   |                                              |                            |                                    |                         |
| CYP51A1                                     | Cholesterol Metabolism (12464255); Cytochrome P450                                               | 2.1                            | 1.08E-04                   |                                        |                            | 1.6                                          | 5.76E-03                   |                                    |                         |
| CYP7A1                                      | Cholesterol Metabolism (19965590); Cytochrome P450                                               | 12.7                           | 4.64E-02                   |                                        |                            |                                              |                            |                                    |                         |
| DGAT2                                       | Triglyceride Synthesis (11481335); NAT SF Superfamily                                            |                                |                            |                                        |                            | 1.8                                          | 3.05E-02                   |                                    |                         |
| DHCR7                                       | Cholesterol Biosynthesis (9465114); PEMT SF                                                      | 1.9                            | 3.19E-04                   |                                        |                            | 1.6                                          | 1.99E-03                   |                                    |                         |
| EBP                                         | Cholesterol Biosynthesis (17498944); EBP SF                                                      | 2.6                            | 1.17E-05                   |                                        |                            | 2.3                                          | 4.62E-06                   |                                    |                         |
| ELOVL6                                      | Fatty Acid Metabolism (19259639); ELO SF                                                         |                                |                            |                                        |                            | 2.4                                          | 1.46E-05                   |                                    |                         |
| FABP3                                       | Long-chain Fatty Acid Transport (3421901); Lipocalin SF                                          |                                |                            |                                        |                            | 2.3                                          | 1.30E-03                   | 3.3                                | 3.51E-08                |
| FADS1                                       | Fatty Acid Desaturase; Cyt-b5 SF; Membrane-FADS-like SF                                          | 2.4                            | 6.98E-08                   |                                        |                            | 1.8                                          | 8.80E-05                   |                                    |                         |
| FADS2                                       | Fatty Acid Desaturase; Cyt-b5 SF; Membrane-FADS-like SF                                          | 2.8                            | 2.38E-06                   |                                        |                            | 2.3                                          | 1.63E-05                   |                                    |                         |
| FASN                                        | Fatty Acid Biosynthesis (7835891); Acyl Transf 1 SF; NADB Rossmann SF                            | 2.1                            | 1.09E-04                   |                                        |                            | 1.7                                          | 3.60E-03                   |                                    |                         |
| FDFT1                                       | Cholesterol Biosynthesis (19054015); Isoprenoid Biosynthesis C1 SF                               | 1.9                            | 3.52E-04                   |                                        |                            | 1.9                                          | 1.14E-05                   |                                    |                         |
| FDPS                                        | Cholesterol Biosynthesis (8188698); Isoprenoid Biosyn C1 SF                                      | 2.2                            | 8.28E-05                   |                                        |                            | 1.8                                          | 2.52E-03                   | 2.0                                | 3.53E-02                |
| FFAR2                                       | Acetate/Butyrate/Propionate Receptor (12711604, 27966553, 19574715); GPCR SF                     | 3.0                            | 5.18E-04                   | 3.6                                    | 1.18E-05                   |                                              |                            |                                    |                         |
| FFAR4                                       | Fatty Acid Receptor (20813258); GPCR SF                                                          | 2.3                            | 1.81E-02                   |                                        |                            | 2.3                                          | 5.35E-03                   | 2.3                                | 2.68E-02                |
| GPAT3                                       | Triglyceride Biosynthesis (20181984); LPLAT SF                                                   | 2.8                            | 1.40E-04                   |                                        |                            | 2.5                                          | 7.03E-05                   |                                    |                         |
| HDLBP                                       | Cholesterol Metabolism; KH-I SF                                                                  |                                |                            |                                        |                            |                                              |                            | 2.1                                | 1.81E-02                |
| HMGCR                                       | Cholesterol Biosynthesis; MMPL SF; HMG-CoA Reductase SF                                          | 1.9                            | 1.25E-03                   |                                        |                            |                                              |                            | 1.9                                | 1.78E-04                |
| HMGCS1                                      | Cholesterol Metabolism (7913309); HMG CoA Synth C SF                                             | 3.9                            | 7.11E-09                   |                                        |                            |                                              |                            | 2.8                                | 3.97E-07                |
| HSD17B7                                     | Cholesterol Biosynthesis; NADB Rossmann SF; SDR SF                                               | 2.7                            | 9.57E-06                   |                                        |                            |                                              |                            | 1.9                                | 1.22E-03                |
| ID1                                         | Cholesterol Metabolism; Nudix Hydrolase SF                                                       | 3.1                            | 3.39E-06                   |                                        |                            |                                              |                            | 2.2                                | 2.17E-04                |
| IFRD1                                       | Lipid Metabolism (16085642); IFRD SF                                                             | 1.8                            | 2.25E-03                   |                                        |                            |                                              |                            |                                    |                         |
| INSIG1                                      | Cholesterol Metabolism (12242342); INSIG SF                                                      | 3.1                            | 6.97E-07                   |                                        |                            | 2.9                                          | 1.64E-08                   |                                    |                         |
| LDLR                                        | Cholesterol Metabolism; LDLa SF; EGF CA SF; LDL Receptor B SF                                    | 2.8                            | 1.77E-06                   |                                        |                            | 2.1                                          | 2.26E-04                   |                                    |                         |
| LIPG                                        | Lipid Metabolism; Lipase SF; PLAT SF                                                             | 4.0                            | 1.77E-03                   |                                        |                            | 2.3                                          | 4.46E-02                   |                                    |                         |
| LIPH                                        | Lipid Metabolism; Lipase SF                                                                      | 2.2                            | 2.78E-04                   |                                        |                            | 1.7                                          | 8.88E-03                   | 2.4                                | 1.88E-04                |
| LPCAT2                                      | Biosynthesis of Phosphatidylcholine (21498505); LPLAT SF; Efh SF                                 |                                |                            | 1.9                                    | 2.33E-03                   |                                              |                            |                                    |                         |
| LRP2                                        | Lipoprotein Metabolism (7642623); LDLa SF; EGF CA SF                                             | 4.3                            | 1.38E-02                   |                                        |                            | 3.6                                          | 1.26E-02                   |                                    |                         |
