# Supplementary material for: Molecular and metabolomic changes in the proximal colon of pigs infected with Trichuris suis
Source: PubMed Central journal article supplement (PMC7393168; doi:10.1038/s41598-020-69462-5), 2020-07-30
Supplement: 41598_2020_69462_MOESM10_ESM.pdf [file 41598_2020_69462_MOESM10_ESM.pdf]

**Molecular and metabolomic changes in the proximal colon of pigs infected with *Trichuris suis***

Harry Dawson<sup>1</sup>, Celine Chen<sup>1</sup>, Robert Li<sup>2</sup>, Lauren Nicki Bell<sup>3</sup>, Terez Shea-Donohue<sup>4</sup>, Helene Kringel<sup>5</sup>, Ethiopia Beshah<sup>1</sup>, Dolores E. Hill<sup>2</sup>, Joseph F. Urban Jr<sup>1,2</sup>.

<sup>1</sup>United States Department of Agriculture, Agricultural Research Service, Northeast Area, Beltsville Human Nutrition Research Center, Diet Genomics and Immunology Laboratory, <sup>2</sup> Beltsville Agricultural Research Center, Animal Parasitology Disease Laboratory, Beltsville, MD; <sup>3</sup>Metabolon, Inc., Morrisville, NC; <sup>4</sup>University of Maryland School of Medicine, Baltimore, MD, USA; <sup>5</sup>Department of Veterinary Disease Biology, Faculty of Health and Medical Sciences, University of Copenhagen, Copenhagen, Denmark

Supplemental Table S10

Supplemental Table S10: Clustered Metabolism Genes (DEGs) - Down-regulated

| Gene                                         | Functional Categorization                                                                  | 52 DPI w worms vs Control Fold | EDGE FDR Adj p value | 52 DPI w/o worms vs Control Fold | EDGE FDR Adj p value | (52 DPI Inf w/o worms vs Worms Fold | EDGE FDR Adj p value | (21 DPI Inf vs Control) Fold | EDGE FDR Adj p value |
|----------------------------------------------|--------------------------------------------------------------------------------------------|--------------------------------|----------------------|----------------------------------|----------------------|-------------------------------------|----------------------|------------------------------|----------------------|
| <b>Amino Acid Metabolism or Transport</b>    |                                                                                            |                                |                      |                                  |                      |                                     |                      |                              |                      |
| ACADSB                                       | BCAA Metabolism (21430231); Leucine Metabolism (21430231); ACAD SF                         | -1.6                           | 1.66E-03             |                                  |                      |                                     |                      |                              |                      |
| AHCYL2                                       | Homocysteine Metabolism; FDH GDH-like SF                                                   | -2.4                           | 5.80E-06             |                                  |                      |                                     |                      |                              |                      |
| AC01                                         | Arginine Metabolism; Tryptophan Metabolism; Cu Amine Oxid SF                               |                                |                      |                                  |                      | -2.1                                | 5.97E-05             | -1.8                         | 2.15E-02             |
| ASPA                                         | Aspartate Metabolism (9407392); Peptidase M14-like SF                                      | -2.9                           | 4.20E-03             |                                  |                      |                                     |                      | -2.8                         | 1.01E-02             |
| IVD                                          | Branched-chain Amino Acid Metabolism (25287287); ACAD SF                                   | -1.6                           | 2.32E-02             |                                  |                      |                                     |                      |                              |                      |
| PIPOX                                        | Lysine Catabolism (10642506); NAD Binding 8 SF                                             | -4.9                           | 6.45E-03             |                                  |                      |                                     |                      |                              |                      |
| SLC25A34                                     | Isopropylmalate Transporter (18682385); Solute Carrier SF                                  | -7.8                           | 1.41E-09             |                                  |                      | -4.2                                | 1.12E-05             |                              |                      |
| SLC25A38                                     | Glycine Transporter (26821380); Solute Carrier SF                                          | -1.9                           | 4.57E-04             |                                  |                      |                                     |                      |                              |                      |
| SLC38A4                                      | Arginine/Glycine/Histidine/Lysine Transporter (11342143); Solute Carrier SF                | -7.7                           | 3.14E-09             | -2.6                             | 5.46E-04             | -3.0                                | 3.10E-03             |                              |                      |
| SLC43A2                                      | BCAA/Methionine/Phenylalanine Transporter (15653393); Solute Carrier SF                    | -1.8                           | 2.00E-03             | -1.6                             | 2.36E-02             |                                     |                      |                              |                      |
| SLC6A6                                       | Taurine Transporter (8010975); SLC5-6-like SBD SF; Solute Carrier SF                       | -1.6                           | 5.12E-02             |                                  |                      |                                     |                      |                              |                      |
| SLC7A3L2*                                    | Orphan Transporter; Spore Permease SF; Solute Carrier SF                                   | -1.8                           | 4.24E-04             |                                  |                      |                                     |                      |                              |                      |
| SLC7A3L4*                                    | Orphan Transporter; Spore Permease SF; Solute Carrier SF                                   | -2.6                           | 4.44E-03             |                                  |                      | -2.1                                | 4.13E-02             |                              |                      |
| SLC7A3L6*                                    | Orphan Transporter; Spore Permease SF; Solute Carrier SF                                   | -2.8                           | 1.70E-02             |                                  |                      |                                     |                      |                              |                      |
| SLC7A3L7*                                    | Orphan Transporter; Spore Permease SF; Solute Carrier SF                                   | -2.4                           | 3.11E-02             |                                  |                      | -2.3                                | 4.90E-02             | -3.6                         | 4.06E-04             |
| SLC7A3L8*                                    | Orphan Transporter; Spore Permease SF; Solute Carrier SF                                   | -1.7                           | 1.79E-02             |                                  |                      |                                     |                      |                              |                      |
| SLC7A8                                       | Alanine/Phenylalanine Transporter; Solute Carrier SF                                       | -3.1                           | 2.76E-05             |                                  |                      | -2.1                                | 5.64E-03             |                              |                      |
| THNSL2                                       | O-phospho-homoserine Catabolism (17034760); Trp-synth-beta II SF                           |                                |                      | -2.2                             | 2.04E-04             |                                     |                      |                              |                      |
| <b>Carbohydrate Metabolism or Transport</b>  |                                                                                            |                                |                      |                                  |                      |                                     |                      |                              |                      |
| AKR1E2                                       | Fructose Metabolism (9504428); Aldo Ket Red SF                                             | -1.9                           | 3.20E-03             |                                  |                      | -1.8                                | 4.12E-03             |                              |                      |
| ALDOB                                        | Fructose Metabolism; Glycolysis; Aldolase Class I SF                                       | -27.7                          | 2.35E-07             |                                  |                      |                                     |                      | -10.6                        | 8.40E-19             |
| FBP2                                         | Fructose Metabolism (16213487); Gluconeogenesis (18780768); FIG SF                         | -1.6                           | 1.05E-02             |                                  |                      |                                     |                      |                              |                      |
| PKC1                                         | Gluconeogenesis (20124556); PEPCk Hprk SF                                                  | -16.9                          | 1.62E-07             | -3.1                             | 1.86E-02             | -5.4                                | 1.48E-03             |                              |                      |
| PDK2                                         | Gluconeogenesis (12682057); BCDHK Adom3 SF; HATPase C SF                                   | -1.9                           | 1.11E-03             | -1.6                             | 1.50E-02             |                                     |                      |                              |                      |
| PDK4                                         | Gluconeogenesis; BCDHK Adom3 SF; HATPase C SF                                              | -7.7                           | 2.11E-04             | -3.0                             | 3.61E-02             |                                     |                      | -4.6                         | 5.99E-03             |
| PFKFB4                                       | Fructose Metabolism (10095107); Glycolysis; P-loop NTPase SF                               | -2.0                           | 4.11E-05             |                                  |                      |                                     |                      |                              |                      |
| PGM5                                         | Biosynthesis of Glucose-6-phosphate (8586438); Phosphohexomutase SF                        |                                |                      |                                  |                      |                                     |                      | -2.1                         | 8.60E-04             |
| SI                                           | Isomaltose/Sucrose Metabolism (7002920); Trefol SF; GH31 SF                                | -7.9                           | 8.57E-03             |                                  |                      | -6.1                                | 2.79E-02             |                              |                      |
| SLC22A4                                      | Ascorbic Acid/Class I Glucose Transporter Family Member (23177992); Solute Carrier SF      | -1.8                           | 1.06E-03             |                                  |                      |                                     |                      |                              |                      |
| SLC45A3                                      | Glucose Transporter (22521588); Solute Carrier SF                                          |                                |                      |                                  |                      | -1.6                                | 2.17E-02             |                              |                      |
| <b>Lipid Metabolism or Transport</b>         |                                                                                            |                                |                      |                                  |                      |                                     |                      |                              |                      |
| A1CF                                         | Lipid Metabolism (29083408); RNA Recognition Motif (RRM) SF; DSRM SF                       |                                |                      | -1.6                             | 1.73E-02             |                                     |                      |                              |                      |
| ABCA1                                        | Cholesterol Metabolism; Lipid Metabolism; ABC ATPase SF                                    |                                |                      |                                  |                      | -1.7                                | 5.31E-02             | -1.9                         | 5.62E-03             |
| ABCA6                                        | Macrophage Cholesterol Metabolism (11478798); ABC ATPase SF                                | -6.5                           | 3.05E-06             |                                  |                      | -4.4                                | 1.88E-04             | -6.4                         | 3.40E-08             |
| ABCA8                                        | Bile Acid Transporter (12379217); ABC ATPase SF                                            | -4.1                           | 3.01E-03             |                                  |                      | -2.7                                | 4.77E-02             | -6.8                         | 4.42E-10             |
| ABCA9                                        | Macrophage Cholesterol Transport (12150964); ABC ATPase SF                                 | -2.2                           | 2.05E-03             |                                  |                      | -2.7                                | 5.24E-02             | -5.5                         | 3.06E-08             |
| ABCB4                                        | Bile Acid Phospholipid Transport; ABC ATPase SF                                            | -2.7                           | 2.10E-02             |                                  |                      |                                     |                      |                              |                      |
| ABCC6                                        | Cholesterol Transport (25064003); ABC ATPase SF                                            | -2.1                           | 2.65E-05             |                                  |                      |                                     |                      |                              |                      |
| ACAD10                                       | Fatty Acid Oxidation (21237653); ACAD SF                                                   | -1.6                           | 1.02E-02             |                                  |                      |                                     |                      |                              |                      |
| ACADS                                        | Fatty Acid Beta Oxidation; Mitochondrial Lipid Metabolism (18977676); ACAD SF              | -1.7                           | 2.86E-03             |                                  |                      |                                     |                      |                              |                      |
| ACSBG1                                       | Very Long-chain Fatty Acid Oxidation (10954728); Acyl-CoA Synthetase SF (17762044)         | -2.8                           | 4.00E-02             |                                  |                      |                                     |                      |                              |                      |
| ACSL6                                        | Lipid Metabolism; Long-chain ACS Family; AFD Class I SF; Acyl-CoA Synthetase SF (17762044) |                                |                      |                                  |                      |                                     |                      | -3.7                         | 9.52E-03             |
| APOE                                         | Cholesterol Metabolism; Apolipoprotein A1/A4/E SF                                          | -1.7                           | 3.18E-02             |                                  |                      |                                     |                      |                              |                      |
| APOL2                                        | Apol SF                                                                                    | -2.4                           | 1.75E-04             |                                  |                      | -1.7                                | 3.42E-02             |                              |                      |
| BDH1                                         | Fatty Acid Catabolism (8679568); NADB Rossmann SF                                          |                                |                      | -1.7                             | 5.79E-03             | -1.7                                | 7.89E-03             |                              |                      |
| CES1B*                                       | Cholesterol Metabolism; Lipid Metabolism; Carboxylesterase Family                          | -2.1                           | 5.66E-04             | -1.7                             | 7.07E-03             |                                     |                      |                              |                      |
| CYP4V2                                       | Fatty Acid Metabolism (19661213); Cytochrome P450 SF                                       |                                |                      |                                  |                      |                                     |                      | -2.0                         | 1.52E-02             |
| CYP7B1                                       | Bile Acid Synthesis (2492729); Cytochrome p450 SF                                          |                                |                      |                                  |                      | -2.0                                | 1.59E-02             | -1.7                         | 4.83E-02             |
| FAAH                                         | Lipid Metabolism; Amidase SF                                                               | -2.7                           | 8.61E-04             |                                  |                      |                                     |                      |                              |                      |
| FABP1                                        | Lipid Metabolism (17449472); Lipocalin SF                                                  | -3.7                           | 5.00E-05             |                                  |                      | -2.4                                | 1.03E-02             |                              |                      |
| FABP3L2*                                     | Lipocalin SF                                                                               |                                |                      |                                  |                      |                                     |                      | -44.6                        | 1.84E-04             |
| FABP4                                        | Lipid Metabolism (11891416); Lipocalin SF                                                  | -2.7                           | 1.86E-02             |                                  |                      |                                     |                      |                              |                      |
| GPIHBP1                                      | Lipoprotein Metabolism (17997385); LU SF                                                   | -5.3                           | 6.94E-04             | -2.5                             | 3.06E-02             |                                     |                      |                              |                      |
| HADHA                                        | Long Chain Fatty Acid Beta Oxidation (8135828); Crotonase-like SF; AdoMet MTases SF        | -1.7                           | 1.84E-04             | -1.5                             | 1.16E-03             |                                     |                      |                              |                      |
| LIPA                                         | Lipid Metabolism (16131527); Abhydro Lipase SF                                             | -1.5                           | 3.68E-02             |                                  |                      |                                     |                      |                              |                      |
| LIPE                                         | Lipid Metabolism; HSL N SF                                                                 | -1.7                           | 3.48E-02             |                                  |                      |                                     |                      |                              |                      |
| LIPM                                         | Abhydro Lipase SF                                                                          |                                |                      |                                  |                      |                                     |                      | -19.0                        | 2.62E-02             |
| MOGAT2                                       | Triglyceride Biosynthesis (25164810); LPLAT SF                                             | -9.2                           | 1.14E-03             |                                  |                      | -4.9                                | 2.97E-02             | -5.4                         | 8.78E-03             |
| OSBPL10                                      | Cholesterol Metabolism (19554302); H-like SF; Oxysterol BP SF                              | -1.9                           | 6.89E-03             |                                  |                      |                                     |                      |                              |                      |
| PLIN1                                        | Inhibition of Lipolysis (17353653); Penlipin SF                                            | -4.0                           | 3.06E-02             |                                  |                      |                                     |                      | -4.3                         | 4.50E-05             |
| PLTP                                         | Lipoprotein Metabolism; B1 SF                                                              | -1.7                           | 1.75E-02             |                                  |                      |                                     |                      |                              |                      |
| PNPLA2                                       | Lipid Metabolism (18445677); Patatin and cPLA2 SF                                          | -2.4                           | 1.05E-02             |                                  |                      |                                     |                      |                              |                      |
| PNPLA6                                       | Phosphatidylcholine Catabolism (15044461); CAP ED SF; Patatin and cPLA2 SF                 | -1.6                           | 2.08E-02             | -1.6                             | 1.01E-02             | -1.5                                | 3.42E-02             |                              |                      |
| PNPLA7                                       | Lysophospholipase (18088666); CAP ED SF; Patatin and cPLA2 SF                              | -1.6                           | 4.92E-03             |                                  |                      | -1.6                                | 6.03E-03             |                              |                      |
| PON1                                         | Lipid Metabolism (19550323); Str Synth SF                                                  |                                |                      | -4.5                             | 4.13E-02             |                                     |                      |                              |                      |
| PPAP2B                                       | Sphingosine-1-phosphate (S1P) Metabolism (12471011); PAP2-like SF                          |                                |                      |                                  |                      |                                     |                      | -1.8                         | 1.44E-02             |
| SCARB2                                       | Cholesterol Metabolism (14570588); SRCR SF                                                 | -1.6                           | 1.71E-03             |                                  |                      | -1.6                                | 5.21E-04             |                              |                      |
| SCARF1                                       | Lipid Metabolism (15145948); EGF Lam SF                                                    | -1.5                           | 4.78E-02             |                                  |                      |                                     |                      |                              |                      |
| SLC10A2                                      | Bile Acid Transporter; Lipid Metabolism; Solute Carrier SF                                 | -1285.8                        | 8.30E-08             | -4.3                             | 4.13E-02             | -297.1                              | 1.18E-04             |                              |                      |
| SLC16A1                                      | Short-chain Fatty Acid Transporter; Solute Carrier SF                                      | -5.7                           | 0.00E+00             |                                  |                      | -4.4                                | 0.00E+00             | -2.2                         | 1.59E-03             |
| SLC25A20                                     | Carbonyl Transporter; Fatty Acid Metabolism; Solute Carrier SF                             | -2.1                           | 1.13E-04             |                                  |                      |                                     |                      |                              |                      |
| SLC25A29                                     | Mitochondrial Carnitine Transporter (12882971, 19287344); Solute Carrier SF                | -1.9                           | 1.01E-02             |                                  |                      |                                     |                      |                              |                      |
| SLC25A42                                     | Coenzyme A Transporter (19429682); Solute Carrier SF                                       |                                |                      |                                  |                      | -2.1                                | 7.36E-03             |                              |                      |
| SLC27A1                                      | Fatty Acid Transporter; Lipid Metabolism; Solute Carrier SF                                | -1.7                           | 3.17E-02             |                                  |                      |                                     |                      |                              |                      |
| TM6SF2                                       | Lipid Metabolism (24927523); DUF2781 SF                                                    | -6.3                           | 2.26E-14             |                                  |                      | -4.0                                | 1.95E-09             |                              |                      |
| <b>Mineral Metabolism or Transport</b>       |                                                                                            |                                |                      |                                  |                      |                                     |                      |                              |                      |
| ABCG2                                        | Heme Transport (16487711); ABC ATPase SF                                                   | -7.6                           | 6.40E-07             |                                  |                      | -3.4                                | 2.49E-03             | -3.5                         | 9.73E-07             |
| CLCA4                                        | Chloride Ion Transport; CLCA N SF; vWFA SF                                                 | -27.9                          | 1.34E-07             |                                  |                      |                                     |                      |                              |                      |
| FTL                                          | Iron Storage; Ferritin-like SF                                                             | -1.6                           | 4.64E-02             |                                  |                      |                                     |                      |                              |                      |
| PHEX                                         | Phosphate Metabolism (2239660); Glu/Zincin SF                                              |                                |                      |                                  |                      |                                     |                      | -6.8                         | 1.81E-02             |
| SCARA5                                       | Ferritin Receptor (19154717); Iron Metabolism (19154717); SRCR SF                          | -2.4                           | 2.08E-02             |                                  |                      |                                     |                      |                              |                      |
| SELENBP1                                     | Selenium Containing Protein; BP56 SF                                                       | -4.4                           | 1.11E-11             |                                  |                      | -3.0                                | 1.73E-07             |                              |                      |
| SELENOP                                      | Selenoprotein (12423375); Selenoprotein P SF                                               | -3.3                           | 2.97E-08             |                                  |                      | -2.3                                | 5.83E-05             |                              |                      |
| SLC25A3                                      | Mitochondrial Phosphate Transporter (23266187); Solute Carrier SF                          |                                |                      |                                  |                      |                                     |                      | -1.9                         | 2.19E-02             |
| SLC26A3                                      | Chloride Ion Transport (16715296); Solute Carrier SF                                       | -12.7                          | 8.30E-08             |                                  |                      | -12.0                               | 9.62E-08             | -2.5                         | 8.05E-03             |
| SLC30A10                                     | Mg Transporter (22341972); Zn Transporter (22706290); Solute Carrier SF                    | -10.2                          | 3.00E-03             |                                  |                      | -6.3                                | 2.38E-02             | -9.4                         | 2.71E-13             |
| SLC30A3                                      | Zn Transporter; Solute Carrier SF                                                          | -3.1                           | 8.38E-03             |                                  |                      |                                     |                      |                              |                      |
| SLC31A2                                      | Copper Transporter (9207117); Solute Carrier SF                                            | -1.8                           | 2.06E-02             |                                  |                      |                                     |                      |                              |                      |
| SLC39A5                                      | Zn Transporter (15322118); Solute Carrier SF                                               | -2.3                           | 3.63E-02             |                                  |                      |                                     |                      |                              |                      |
| SLC8A1                                       | Intestinal Calcium Transport (26109800); Solute Carrier SF                                 |                                |                      |                                  |                      | -1.6                                | 5.29E-02             | -2.1                         | 2.28E-03             |
| <b>Vitamin Metabolism or Transport</b>       |                                                                                            |                                |                      |                                  |                      |                                     |                      |                              |                      |
| ALDH1A3                                      | Retinoic Acid Synthesis; Vitamin A Metabolism; ALDH-SF SF                                  |                                |                      |                                  |                      | -2.0                                | 1.10E-02             |                              |                      |
| CYP26B1                                      | Retinoic Acid Catabolism; Vitamin A Metabolism; Cytochrome P450 SF                         | -5.0                           | 2.61E-08             |                                  |                      | -4.6                                | 4.16E-08             | -4.8                         | 9.76E-03             |
| CYP27A1                                      | Vitamin D Metabolism (15353333); Cytochrome P450 SF                                        | -1.8                           | 3.99E-02             |                                  |                      |                                     |                      |                              |                      |
| MTHFR                                        | Folic Acid Metabolism; MTHFR SF                                                            | -1.8                           | 7.98E-03             |                                  |                      |                                     |                      |                              |                      |
| NADK                                         | NADPH Metabolism (17855339); nadF SF                                                       |                                |                      |                                  |                      | -1.6                                | 4.96E-03             |                              |                      |
| RBP5                                         | Vitamin A Metabolism (11274389); Lipocalin SF                                              | -2.4                           | 5.79E-03             |                                  |                      |                                     |                      |                              |                      |
| RDH10                                        | Retinol Dehydrogenase; Vitamin A Metabolism; NADB Rossmann SF; SDR SF                      |                                |                      |                                  |                      |                                     |                      | -2.0                         | 2.25E-02             |
| RDH16                                        | Retinol Dehydrogenase; Vitamin A Metabolism; NADB Rossmann SF; SDR SF                      | -6.1                           | 3.20E-03             | -2.8                             | 4.89E-02             |                                     |                      |                              |                      |
| RETSAT                                       | Vitamin A Metabolism (15358783); NADB Rossmann SF; COG1233 SF                              | -2.2                           | 4.10E-06             |                                  |                      | -1.6                                | 7.89E-03             |                              |                      |
| SDR9C7                                       | Retinoid Dehydrogenase (19703561); NADB Rossmann SF; SDR SF                                | -9.3                           | 8.99E-03             | -4.2                             | 2.26E-02             |                                     |                      |                              |                      |
| SLC26A32                                     | Folate Transporter (10978331); Solute Carrier SF                                           |                                |                      |                                  |                      |                                     |                      |                              |                      |
| TCN2                                         | Vitamin B12 Transporter; Cobalamin Bind SF; DUF4430 SF                                     | -1.5                           | 3.88E-02             |                                  |                      |                                     |                      |                              |                      |
| VDR                                          | Vitamin D3 Signaling; Transcription Factor; NR-DBD SF                                      | -1.7                           | 7.90E-03             |                                  |                      |                                     |                      |                              |                      |
| <b>Miscellaneous Metabolism or Transport</b> |                                                                                            |                                |                      |                                  |                      |                                     |                      |                              |                      |
| ABCB1                                        | ATP-dependent Xenobiotic Efflux; ABC Membrane SF; P-loop NTPase SF                         |                                |                      |                                  |                      | -2.0                                | 7.10E-03             |                              |                      |
| ABCB6                                        | Coproporphyrinogen III Transporter (23792964); ABC Membrane SF                             |                                |                      |                                  |                      | -1.6                                | 5.08E-03             |                              |                      |
| ABCC4L2*                                     | Orphan Transporter; ABC Membrane SF; P-loop NTPase SF                                      |                                |                      |                                  |                      |                                     |                      | -3.4                         | 2.05E-10             |
