# Supplementary material for: Molecular and metabolomic changes in the proximal colon of pigs infected with Trichuris suis
Source: PubMed Central journal article supplement (PMC7393168; doi:10.1038/s41598-020-69462-5), 2020-07-30
Supplement: 41598_2020_69462_MOESM11_ESM.pdf [file 41598_2020_69462_MOESM11_ESM.pdf]

**Molecular and metabolomic changes in the proximal colon of pigs infected with *Trichuris suis***

Harry Dawson<sup>1</sup>, Celine Chen<sup>1</sup>, Robert Li<sup>2</sup>, Lauren Nicki Bell<sup>3</sup>, Terez Shea-Donohue<sup>4</sup>, Helene Kringel<sup>5</sup>, Ethiopia Beshah<sup>1</sup>, Dolores E. Hill<sup>2</sup>, Joseph F. Urban Jr<sup>1,2</sup>.

<sup>1</sup>United States Department of Agriculture, Agricultural Research Service, Northeast Area, Beltsville Human Nutrition Research Center, Diet Genomics and Immunology Laboratory, <sup>2</sup> Beltsville Agricultural Research Center, Animal Parasitology Disease Laboratory, Beltsville, MD; <sup>3</sup>Metabolon, Inc., Morrisville, NC; <sup>4</sup>University of Maryland School of Medicine, Baltimore, MD, USA; <sup>5</sup>Department of Veterinary Disease Biology, Faculty of Health and Medical Sciences, University of Copenhagen, Copenhagen, Denmark

Supplemental Table S11
